# Supplementary material for: Enantio- and diastereodivergent synthesis of fused indolizines enabled by synergistic Cu/Ir catalysis
Source: Royal Society of Chemistry journal article supplement (doi:10.1039/d3sc00118k), 2023-01-01
Supplement: d3sc00118k1.pdf [file d3sc00118k1.pdf]

Electronic Supplementary Information

## Enantio- and Diastereodivergent Synthesis of Fused Indolizines Enabled by Synergistic Cu/Ir Catalysis

Bing-Ke Zhu,<sup>ab§</sup> Hui Xu,<sup>c§</sup> Lu Xiao,<sup>a</sup> Xin Chang,<sup>a</sup> Liang Wei,<sup>a</sup> Huailong Teng,<sup>d</sup> Yanfeng Dang,<sup>c\*</sup>  
Xiu-Qin Dong,<sup>a\*</sup> and Chun-Jiang Wang<sup>ab\*</sup>

a

<sup>a</sup> College of Chemistry and Molecular Sciences, Engineering Research Center of Organosilicon Compounds & Materials, Ministry of Education, Wuhan University, Wuhan, Hubei, 430072, P. R. China.

<sup>b</sup> State Key Laboratory of Organometallic Chemistry, Shanghai Institute of Organic Chemistry, Shanghai 230021, China.

<sup>c</sup> Tianjin Key Laboratory of Molecular Optoelectronic Sciences, Department of Chemistry, Tianjin University, Tianjin 300072, China.

<sup>d</sup> College of Science, Huazhong Agricultural University, Wuhan, 430070, P. R. China.

§ These two authors contributed equally.

E-mail: yanfeng.dang@tju.edu.cn, xiuqindong@whu.edu.cn, cjwang@whu.edu.cn

### Table of Contents

|                                                                                           |      |
|-------------------------------------------------------------------------------------------|------|
| 1. General Remarks.....                                                                   | S2   |
| 2. Synthetic Procedures and Characterization for Substituted 2-Indolizine Carbonates..... | S2   |
| 3. General Procedures and Characterization for Fused Indolizine.....                      | S7   |
| 4. Experimental Procedures and Characterization for Synthetic Applications.....           | S28  |
| 5. Hammett Plot Studies.....                                                              | S31  |
| 6. X-ray Structure of (1 <i>S</i> , 3 <i>R</i> , 4 <i>R</i> )- <b>3k</b> .....            | S33  |
| 7. References.....                                                                        | S34  |
| 8. NMR and HPLC Spectra.....                                                              | S35  |
| 9. Computational Details.....                                                             | S166 |

## 1. General Remarks

Unless otherwise stated, all reactions were set up under nitrogen atmosphere in oven-dried glassware using standard Schlenk techniques, monitored by TLC with silica-gel coated plates and purified by flash column chromatography. Commercially available reagents were used without further purification. Solvents were purified prior to use according to the standard methods. Aldimine esters<sup>1</sup>, chiral ligands **L1-L4**,<sup>2</sup> **L6**,<sup>3</sup> and 2-indolizine carbaldehyde<sup>4</sup> and 2-indolizine carbonates<sup>5</sup> were prepared according to the literature procedure. <sup>1</sup>H NMR spectra were recorded on a Bruker 400 MHz spectrometer in CDCl<sub>3</sub> (or DMSO). Chemical shifts are reported in ppm with the internal TMS signal at 0.0 ppm as a standard. The data are reported as (s = single, d = double, t = triple, q = quarte, m = multiple or unresolved, coupling constant(s) in Hz, integration). <sup>13</sup>C NMR spectra were recorded on a Bruker 100 MHz spectrometer in CDCl<sub>3</sub>. Chemical shifts are reported in ppm with the internal chloroform signal at 77.0 ppm as a standard. Enantiomeric excess values were determined by HPLC analysis employing AS-H, AD-H, IA, IC, ID, IE and OD-H chiral columns, using hexane and *i*-propanol as solvents. The racemic products were obtained by running reactions with racemic catalysts or blending equal amount of two enantiomers. The absolute configuration of compound **3k** was determined unequivocally according to the X-ray diffraction analysis.

## 2. Synthetic Procedures and Characterization for Substituted 2-Indolizine Carbonates

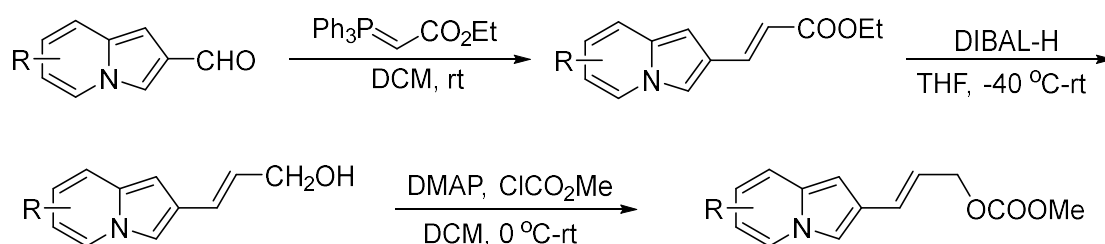

To a solution of indolizine-2-carbaldehyde (2.6 g, 18.1 mmol) in CH<sub>2</sub>Cl<sub>2</sub> (60 mL) was added phosphorus ylide (7.3 g, 21.7 mmol) in one portion at 25 °C. The reaction was then stirred at 25 °C until complete consumption of starting material (detected by TLC). The mixture was concentrated under reduced pressure, and the residue was purified by a flash column chromatography (PE/EA = 5/1, with 1% Et<sub>3</sub>N) to provide ethyl (*E*)-3-(indolizin-2-yl)acrylate (3.3 g, 90% yield) as a light yellow solid.

Under nitrogen atmosphere, to a solution of ethyl (*E*)-3-(indolizin-2-yl)acrylate (3.3 g, 16.3 mmol)

in anhydrous THF (50 mL) was added DIBAL-H (1.5 M, 16.3 mL, 24.5 mmol) dropwise at -40 °C. After stirring at -40 °C for 30 min, the reaction was then moved into 25 °C and continuously stirred until complete consumption of starting material (detected by TLC). The reaction mixture was quenched with H<sub>2</sub>O, extracted with EA (× 3) and filtered through celite to remove the colloid. The organic layer was combined, washed with brine, dried over anhydrous Na<sub>2</sub>SO<sub>4</sub> before evaporation. Then the residue was purified by a flash column chromatography (PE/EA = 3/1, with 1% Et<sub>3</sub>N) to afford (*E*)-3-(indolizin-2-yl)prop-2-en-1-ol (2.7 g, 95% yield) as a yellow solid.

(*E*)-3-(1-methyl-1*H*-indol-2-yl)prop-2-en-1-ol (2.7 g, 15.5 mmol) and DMAP (2.8 g, 23.3 mmol) were dissolved in CH<sub>2</sub>Cl<sub>2</sub> (70 mL) before cooled to 0 °C. Then methyl chlorocarbonate (1.4 mL, 18.6 mmol) was added dropwise *via* syringe at the same temperature. After stirring at 0 °C for 30 min, the reaction was then moved into 25 °C and continuously stirred until complete consumption of starting material (detected by TLC). Then the reaction mixture was quenched with a saturated solution of NaHCO<sub>3</sub> and extracted with CH<sub>2</sub>Cl<sub>2</sub> (× 3). The organic layer was combined, washed with brine and dried over anhydrous Na<sub>2</sub>SO<sub>4</sub>. After filtration and evaporation, the residue was purified by a flash column chromatography (PE/EA = 5/1, with 1% Et<sub>3</sub>N) to provide (*E*)-3-(indolizin-2-yl)allyl methyl carbonate **2a** (3.2 g, 90% yield) as a white solid.

## Characterization for Carbonates 2:

### Ethyl (*E*)-3-(indolizin-2-yl)acrylate (**2ac**)

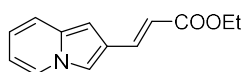

Yield (90%); Yellow solid. <sup>1</sup>H NMR (400 MHz, Chloroform-*d*) δ 7.82 – 7.78 (m, 1H), 7.74 (d, *J* = 16.0 Hz, 1H), 7.43 (s, 1H), 7.29 (d, *J* = 9.2 Hz, 1H), 6.67 – 6.61 (m, 1H), 6.57 (s, 1H), 6.47 – 6.41 (m, 1H), 6.33 (d, *J* = 15.6 Hz, 1H), 4.25 (q, *J* = 7.2 Hz, 2H), 1.33 (t, *J* = 7.2 Hz, 3H). <sup>13</sup>C NMR (100 MHz, Chloroform-*d*) δ 167.5, 138.5, 133.8, 125.1, 124.2, 119.4, 118.2, 116.8, 114.0, 111.3, 97.1, 60.2, 14.3.

### (*E*)-3-(indolizin-2-yl)prop-2-en-1-ol (**2ad**)

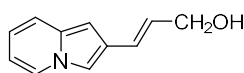

Yield (95%); Yellow solid. <sup>1</sup>H NMR (400 MHz, Chloroform-*d*) δ 7.81 – 7.76 (m, 1H), 7.28 – 7.25 (m, 2H), 6.66 – 6.58 (m, 2H), 6.47 (s, 1H), 6.42 – 6.37 (m, 1H), 6.28 (dt, *J* = 16.0, 6.0 Hz, 1H), 4.29 (d, *J*

= 6.0 Hz, 2H).  $^{13}\text{C}$  NMR (100 MHz, Chloroform-*d*)  $\delta$  133.4, 127.5, 126.3, 124.93, 124.89, 118.9, 117.5, 111.2, 110.3, 96.1, 64.0.

**(*E*)-3-(indolizin-2-yl)allyl methyl carbonate (2a)**

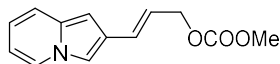

Yield (90%); White solid, m.p. = 103 °C.  $^1\text{H}$  NMR (400 MHz, Chloroform-*d*)  $\delta$  7.78 (d,  $J$  = 7.2 Hz, 1H), 7.29 – 7.24 (m, 2H), 6.72 (d,  $J$  = 16.0 Hz, 1H), 6.64 – 6.58 (m, 1H), 6.47 (s, 1H), 6.42 – 6.36 (m, 1H), 6.25 – 6.15 (m, 1H), 4.77 (d,  $J$  = 6.0 Hz, 2H), 3.79 (s, 3H).  $^{13}\text{C}$  NMR (100 MHz, Chloroform-*d*)  $\delta$  155.7, 133.4, 128.7, 125.7, 124.9, 121.2, 118.9, 117.6, 111.6, 110.5, 96.3, 68.8, 54.7.

**Ethyl (*E*)-3-(8-methylindolizin-2-yl)acrylate (2bc)**

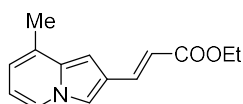

Yield (80%); Yellow solid.  $^1\text{H}$  NMR (400 MHz, Chloroform-*d*)  $\delta$  7.75 (d,  $J$  = 16.0 Hz, 1H), 7.71 (d,  $J$  = 6.8 Hz, 1H), 7.44 (s, 1H), 6.56 (s, 1H), 6.48 – 6.44 (m, 1H), 6.42 – 6.37 (m, 1H), 6.37 – 6.32 (m, 1H), 4.25 (q,  $J$  = 7.2 Hz, 2H), 2.36 (s, 3H), 1.33 (t,  $J$  = 7.2 Hz, 3H).  $^{13}\text{C}$  NMR (100 MHz, Chloroform-*d*)  $\delta$  167.6, 138.6, 135.0, 128.5, 123.8, 123.0, 117.2, 116.5, 114.6, 111.4, 95.7, 60.2, 18.0, 14.4.

**(*E*)-3-(8-methylindolizin-2-yl)prop-2-en-1-ol (2bd)**

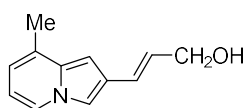

Yield (85%); Yellow solid.  $^1\text{H}$  NMR (400 MHz, Chloroform-*d*)  $\delta$  7.68 (d,  $J$  = 6.8 Hz, 1H), 7.27 – 7.25 (m, 1H), 6.64 (d,  $J$  = 16.0 Hz, 1H), 6.47 – 6.41 (m, 2H), 6.37 – 6.32 (m, 1H), 6.33 – 6.25 (m, 1H), 4.29 (d,  $J$  = 6.0 Hz, 2H), 2.36 (s, 3H).  $^{13}\text{C}$  NMR (100 MHz, Chloroform-*d*)  $\delta$  134.5, 127.9, 127.2, 125.8, 125.0, 122.9, 116.6, 111.7, 110.4, 94.7, 64.0, 18.0.

**(*E*)-methyl (3-(8-methylindolizin-2-yl)allyl) carbonate (2b)**

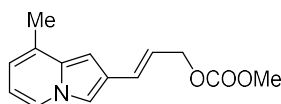

Yield (80%); White solid, m.p. = 87 °C. <sup>1</sup>H NMR (400 MHz, Chloroform-*d*) δ 7.69 (d, *J* = 6.8 Hz, 1H), 7.28 (s, 1H), 6.73 (d, *J* = 16.0 Hz, 1H), 6.46 (s, 1H), 6.45 – 6.40 (m, 1H), 6.39 – 6.32 (m, 1H), 6.22 (dt, *J* = 16.0, 6.8 Hz, 1H), 4.78 (d, *J* = 6.8 Hz, 2H), 3.80 (s, 3H), 2.35 (s, 3H). <sup>13</sup>C NMR (100 MHz, Chloroform-*d*) δ 155.7, 134.5, 128.9, 128.0, 125.2, 123.0, 120.9, 116.7, 112.2, 110.6, 94.9, 68.9, 54.7, 18.0.

#### Ethyl (*E*)-3-(7-chloroindolizin-2-yl)acrylate (2cc)

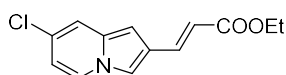

Yield (75%); Yellow solid. <sup>1</sup>H NMR (400 MHz, Chloroform-*d*) δ 7.75 – 7.72 (m, 1H), 7.70 (d, *J* = 16.0 Hz, 1H), 7.41 (s, 1H), 7.28 (s, 1H), 6.52 (s, 1H), 6.44 – 6.40 (m, 1H), 6.32 (d, *J* = 16.0 Hz, 1H), 4.25 (q, *J* = 7.2 Hz, 2H), 1.33 (t, *J* = 7.2 Hz, 3H). <sup>13</sup>C NMR (100 MHz, Chloroform-*d*) δ 167.3, 137.8, 133.4, 125.7, 125.3, 124.4, 117.7, 117.5, 114.3, 112.8, 97.3, 60.3, 14.3.

#### (*E*)-3-(7-chloroindolizin-2-yl)prop-2-en-1-ol (2cd)

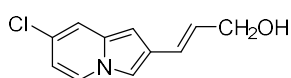

Yield (89%); Yellow solid. <sup>1</sup>H NMR (400 MHz, DMSO-*d*<sub>6</sub>) δ 8.18 (d, *J* = 7.2 Hz, 1H), 7.59 (s, 1H), 7.44 – 7.41 (m, 1H), 6.56 – 6.50 (m, 1H), 6.51 – 6.48 (m, 1H), 6.48 (s, 1H), 6.24 – 6.17 (m, 1H), 4.80 (t, *J* = 5.6 Hz, 1H), 4.12 – 4.06 (m, 2H). <sup>13</sup>C NMR (100 MHz, DMSO-*d*<sub>6</sub>) δ 133.5, 131.4, 128.7, 128.2, 123.6, 123.2, 117.9, 113.3, 112.0, 97.7, 62.8.

#### (*E*)-3-(7-chloroindolizin-2-yl)allyl methyl carbonate (2c)

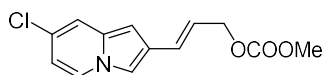

Yield (84%); White solid, m.p. = 120 °C. <sup>1</sup>H NMR (400 MHz, DMSO-*d*<sub>6</sub>) δ 8.20 (d, *J* = 7.2 Hz, 1H), 7.66 (s, 1H), 7.45 (s, 1H), 6.71 (d, *J* = 15.6 Hz, 1H), 6.53 (s, 1H), 6.53 – 6.49 (m, 1H), 6.24 – 6.15 (m, 1H), 4.73 (d, *J* = 6.0 Hz, 2H), 3.72 (s, 3H). <sup>13</sup>C NMR (100 MHz, DMSO-*d*<sub>6</sub>) δ 156.3, 133.6, 129.0, 128.3, 127.5, 124.0, 123.4, 118.1, 114.3, 112.4, 97.9, 69.4, 55.9.

#### Ethyl (*E*)-3-(6-bromoindolizin-2-yl)acrylate (2dc)

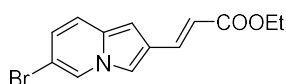

Yield (93%); Yellow solid.  $^1\text{H}$  NMR (400 MHz, Chloroform-*d*)  $\delta$  7.98 (s, 1H), 7.70 (d,  $J = 15.6$  Hz, 1H), 7.40 (s, 1H), 7.22 – 7.17 (m, 1H), 6.73 – 6.68 (m, 1H), 6.61 (s, 1H), 6.33 (d,  $J = 15.6$  Hz, 1H), 4.26 (q,  $J = 7.2$  Hz, 2H), 1.33 (t,  $J = 7.2$  Hz, 3H).  $^{13}\text{C}$  NMR (100 MHz, Chloroform-*d*)  $\delta$  167.3, 137.8, 132.0, 124.9, 124.8, 121.7, 120.0, 117.5, 114.1, 106.3, 98.6, 60.3, 14.4.

**(*E*)-3-(6-bromoindolizin-2-yl)prop-2-en-1-ol (2dd)**

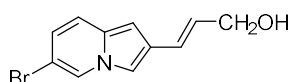

Yield (70%); Yellow solid.  $^1\text{H}$  NMR (400 MHz, DMSO-*d*<sub>6</sub>)  $\delta$  8.50 (s, 1H), 7.57 (s, 1H), 7.31 (d,  $J = 9.6$  Hz, 1H), 6.75 – 6.68 (m, 1H), 6.56 (s, 1H), 6.52 (d,  $J = 16.0$  Hz, 1H), 6.21 (dt,  $J = 16.0, 5.2$  Hz, 1H), 4.09 (d,  $J = 5.2$  Hz, 2H).  $^{13}\text{C}$  NMR (100 MHz, DMSO-*d*<sub>6</sub>)  $\delta$  132.2, 131.4, 128.3, 126.5, 123.2, 121.4, 120.7, 113.4, 105.3, 98.7, 62.9.

**(*E*)-3-(6-bromoindolizin-2-yl)allyl methyl carbonate (2d)**

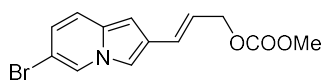

Yield (88%); White solid, m.p. = 120 °C.  $^1\text{H}$  NMR (400 MHz, DMSO-*d*<sub>6</sub>)  $\delta$  8.51 (s, 1H), 7.63 (s, 1H), 7.32 (d,  $J = 9.6$  Hz, 1H), 6.77 – 6.72 (m, 1H), 6.73 – 6.68 (m, 1H), 6.62 (s, 1H), 6.21 (dt,  $J = 16.0, 6.4$  Hz, 1H), 4.73 (d,  $J = 6.4$  Hz, 2H), 3.72 (s, 3H).  $^{13}\text{C}$  NMR (100 MHz, DMSO-*d*<sub>6</sub>)  $\delta$  156.3, 132.3, 129.0, 127.1, 126.7, 123.4, 121.8, 120.9, 114.2, 105.7, 99.0, 69.4, 55.9.

**Ethyl (*E*)-3-(6-phenylindolizin-2-yl)acrylate (2ec)**

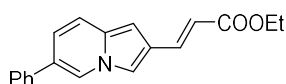

Yield (92%); Yellow solid.  $^1\text{H}$  NMR (400 MHz, Chloroform-*d*)  $\delta$  8.03 (s, 1H), 7.76 (d,  $J = 15.6$  Hz, 1H), 7.57 – 7.47 (m, 3H), 7.47 – 7.41 (m, 2H), 7.40 – 7.33 (m, 2H), 6.99 – 6.94 (m, 1H), 6.61 (s, 1H), 6.35 (d,  $J = 15.6$  Hz, 1H), 4.26 (q,  $J = 7.2$  Hz, 2H), 1.34 (t,  $J = 7.2$  Hz, 3H).  $^{13}\text{C}$  NMR (100 MHz, Chloroform-*d*)  $\delta$  167.5, 138.4, 137.8, 133.0, 128.9, 127.5, 126.5, 125.5, 124.8, 122.3, 119.3, 119.2, 116.9, 114.5, 97.3, 60.2, 14.4.

### (*E*)-3-(6-phenylindolizin-2-yl)prop-2-en-1-ol (2ed)

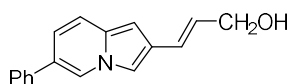

Yield (90%); Yellow solid.  $^1\text{H}$  NMR (400 MHz,  $\text{DMSO-}d_6$ )  $\delta$  8.53 (s, 1H), 7.67 – 7.60 (m, 3H), 7.48 – 7.39 (m, 3H), 7.36 – 7.31 (m, 1H), 7.04 – 6.99 (m, 1H), 6.57 (d,  $J = 16.0$  Hz, 1H), 6.52 (s, 1H), 6.22 (dt,  $J = 16.0, 5.2$  Hz, 1H), 4.81 (t,  $J = 5.6$  Hz, 1H), 4.14 – 4.07 (m, 2H).  $^{13}\text{C}$  NMR (100 MHz,  $\text{DMSO-}d_6$ )  $\delta$  138.8, 133.0, 130.8, 130.2, 128.4, 128.2, 127.2, 124.1, 124.0, 123.7, 119.8, 118.8, 113.4, 97.4, 63.0.

### (*E*)-methyl (3-(6-phenylindolizin-2-yl)allyl) carbonate (2e)

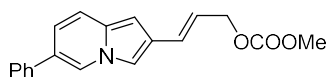

Yield (83%); Yellow solid, m.p. = 105 °C.  $^1\text{H}$  NMR (400 MHz,  $\text{DMSO-}d_6$ )  $\delta$  8.55 (s, 1H), 7.68 – 7.63 (m, 3H), 7.48 – 7.41 (m, 3H), 7.37 – 7.31 (m, 1H), 7.06 – 7.01 (m, 1H), 6.75 (d,  $J = 16.0$  Hz, 1H), 6.58 (s, 1H), 6.21 (dt,  $J = 16.0, 6.4$  Hz, 1H), 4.75 (d,  $J = 6.4$  Hz, 2H), 3.72 (s, 3H).  $^{13}\text{C}$  NMR (100 MHz,  $\text{DMSO-}d_6$ )  $\delta$  156.4, 138.7, 133.1, 130.2, 129.5, 128.4, 127.3, 127.1, 124.4, 124.2, 122.8, 120.0, 119.2, 114.3, 97.6, 69.5, 55.9.

## 3. General Procedures and Characterization for Fused Indolizine

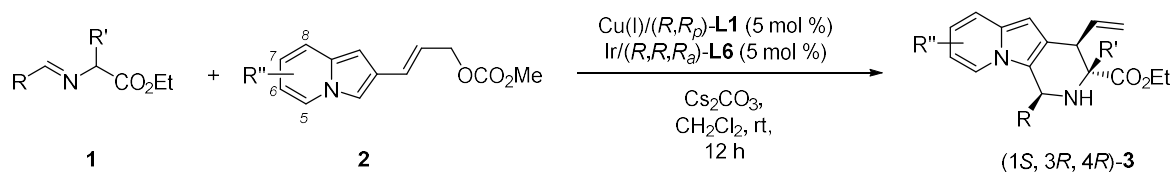

A flame dried Schlenk tube **A** was cooled to room temperature and filled with  $\text{N}_2$ . To this flask were added  $[\text{Ir}(\text{COD})\text{Cl}]_2$  (0.005 mmol), (*S,S,S*)-**L6** (0.010 mmol), degassed THF (0.5 mL) and degassed *n*-propylamine (0.5 mL). The reaction mixture was heated at 50 °C for 30 min and then the volatile solvents were removed under vacuum to gain a pale-yellow solid. Meanwhile,  $\text{Cu}(\text{MeCN})_4\text{BF}_4$  (0.01 mmol) and (*R,R\_p*)-*i*-Pr-Phosferrox-**L1** (0.011 mmol, 5.5 mol %) were dissolved in 1.0 mL of DCM in a Schlenk tube **B**, and stirred at room temperature for about 30 min. Aldimine esters (0.30 mmol), indolizine derived allylic carbonates (0.20 mmol), Ir complexes (0.01 mmol, 5 mol %), base (0.20 mmol)

and DCM (1.0 mL) were added into the Schlenk tube **A** and filled with N<sub>2</sub>. The Cu/**L1** complex solution was then transferred from the Schlenk tube **B** to the Schlenk tube **A** *via* syringe. The reaction mixture was continuously stirred at room temperature under N<sub>2</sub> atmosphere. While the substrate was consumed (monitored by TLC), the reaction was purified by flash column chromatography to give the pure product. The dr value was determined by the crude <sup>1</sup>H NMR spectrum, and the enantiomeric excess was recorded by HPLC analysis in comparison with the racemic sample.

**Ethyl (1*S*,3*R*,4*R*)-1-(4-chlorophenyl)-3-methyl-4-vinyl-1,2,3,4-tetrahydropyrido[4,3-*b*]indolizine-3-carboxylate (1*S*,3*R*,4*R*)-3a**

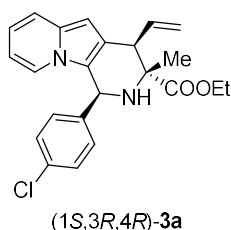

Yield (93%); >20:1 dr; yellow oil.  $[\alpha]_D^{20} = -175.0$  (*c* 0.2, CH<sub>2</sub>Cl<sub>2</sub>); <sup>1</sup>H NMR (400 MHz, Chloroform-*d*) δ 7.32 – 7.27 (m, 3H), 7.25 – 7.20 (m, 2H), 7.02 – 6.98 (m, 1H), 6.56 (m, 1H), 6.31 (s, 1H), 6.21 – 6.16 (m, 1H), 6.17 – 6.08 (m, 1H), 5.45 (s, 1H), 5.25 (dd, *J* = 17.2, 2.0 Hz, 1H), 5.16 (dd, *J* = 10.0, 2.0 Hz, 1H), 4.10 – 4.08 (m, 2H), 4.05 – 3.98 (m, 1H), 1.34 (s, 3H), 1.12 (t, *J* = 7.2 Hz, 3H). <sup>13</sup>C NMR (100 MHz, Chloroform-*d*) δ 175.7, 140.3, 139.1, 133.8, 133.1, 129.8, 129.2, 126.4, 122.2, 118.8, 117.1, 116.4, 116.3, 109.4, 97.1, 62.1, 60.9, 54.9, 45.4, 25.0, 14.1. HRMS (ESI+) Calcd. For C<sub>23</sub>H<sub>23</sub>ClN<sub>2</sub>O<sub>2</sub> ([M+Na]<sup>+</sup>): 417.1340, found: 417.1340. The product was analyzed by HPLC to determine the enantiomeric excess: 99% ee (Chiralpak AD-H, *i*-propanol/hexane = 10/90, flow rate 1.0 mL/min, λ = 254 nm); *t<sub>r</sub>* = 6.41 and 10.82 min.

**Ethyl (1*R*,3*S*,4*S*)-1-(4-chlorophenyl)-3-methyl-4-vinyl-1,2,3,4-tetrahydropyrido[4,3-*b*]indolizine-3-carboxylate (1*R*,3*S*,4*S*)-3a**

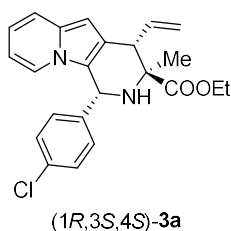

Yield (92%); >20:1 dr; yellow oil.  $[\alpha]_D^{20} = +171.5$  (*c* 0.2, CH<sub>2</sub>Cl<sub>2</sub>). The product was analyzed by



HPLC to determine the enantiomeric excess: 99% ee (Chiralpak AD-H, *i*-propanol/hexane = 10/90, flow rate 1.0 mL/min,  $\lambda = 254$  nm);  $t_r = 6.41$  and 10.82 min.

**Ethyl (1*R*,3*R*,4*S*)-1-(4-chlorophenyl)-3-methyl-4-vinyl-1,2,3,4-tetrahydropyrido[4,3-*b*]indolizine-3-carboxylate (1*R*,3*R*,4*S*)-3a**

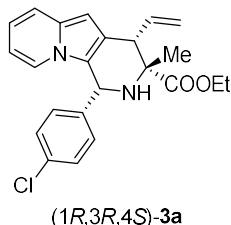

Yield (90%); >20:1 dr; yellow oil.  $[\alpha]_D^{20} = +55.0$  (*c* 0.2, CH<sub>2</sub>Cl<sub>2</sub>); <sup>1</sup>H NMR (400 MHz, Chloroform-*d*)  $\delta$  7.32 – 7.27 (m, 3H), 7.23 – 7.17 (m, 2H), 7.03 (m, 1H), 6.58 – 6.53 (m, 1H), 6.36 – 6.29 (m, 1H), 6.29 (s, 1H), 6.25 – 6.20 (m, 1H), 5.42 – 5.40 (m, 1H), 5.35 – 5.32 (m, 1H), 5.30 (s, 1H), 4.09 – 4.01 (m, 2H), 3.76 (d, *J* = 9.6 Hz, 1H), 1.43 (s, 3H), 1.12 (t, *J* = 7.2 Hz, 3H). <sup>13</sup>C NMR (100 MHz, Chloroform-*d*)  $\delta$  174.4, 140.2, 137.5, 133.7, 132.7, 129.7, 129.2, 126.5, 121.9, 118.8, 118.7, 116.8, 115.9, 109.6, 96.4, 62.8, 60.5, 55.1, 51.1, 25.1, 14.1. HRMS (ESI<sup>+</sup>) Calcd. For C<sub>23</sub>H<sub>23</sub>ClN<sub>2</sub>O<sub>2</sub> ([M+H]<sup>+</sup>): 395.1520, found: 395.1515. The product was analyzed by HPLC to determine the enantiomeric excess: 99% ee (Chiralpak AD-H, *i*-propanol/hexane = 10/90, flow rate 1.0 mL/min,  $\lambda = 254$  nm);  $t_r = 7.20$  and 13.66 min.

**Ethyl (1*S*,3*S*,4*R*)-1-(4-chlorophenyl)-3-methyl-4-vinyl-1,2,3,4-tetrahydropyrido[4,3-*b*]indolizine-3-carboxylate (1*S*,3*S*,4*R*)-3a**

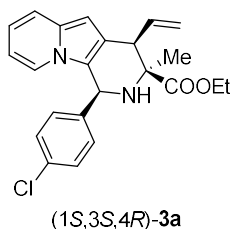

Yield (92%); >20:1 dr; yellow oil.  $[\alpha]_D^{20} = -60.5$  (*c* 0.2, CH<sub>2</sub>Cl<sub>2</sub>). The product was analyzed by HPLC to determine the enantiomeric excess: 99% ee (Chiralpak AD-H, *i*-propanol/hexane = 10/90, flow rate 1.0 mL/min,  $\lambda = 254$  nm);  $t_r = 7.20$  and 13.66 min.

**Ethyl (1*S*,3*R*,4*R*)-1-(4-bromophenyl)-3-methyl-4-vinyl-1,2,3,4-tetrahydropyrido[4,3-*b*]indolizine-3-carboxylate (1*S*,3*R*,4*R*)-3a**

### indolizine-3-carboxylate (1*S*,3*R*,4*R*)-3b

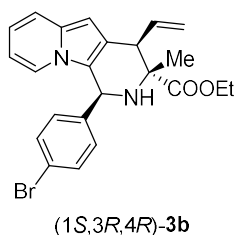

Yield (85%); >20:1 dr; yellow oil.  $[\alpha]_D^{20} = -89.5$  (*c* 1.0, CH<sub>2</sub>Cl<sub>2</sub>); <sup>1</sup>H NMR (400 MHz, Chloroform-*d*) δ 7.45 (d, *J* = 8.4 Hz, 2H), 7.27 (d, *J* = 9.2 Hz, 1H), 7.17 (d, *J* = 8.4 Hz, 2H), 6.08 - 7.02 (m, 1H), 6.58 - 6.52 (m, 1H), 6.31 (s, 1H), 6.22 - 6.16 (m, 1H), 6.17 - 6.08 (m, 1H), 5.44 (s, 1H), 5.25 (dd, *J* = 17.2, 2.0 Hz, 1H), 5.15 (dd, *J* = 10.0, 2.0 Hz, 1H), 4.12 - 4.04 (m, 2H), 4.05 - 3.99 (m, 1H), 1.33 (s, 3H), 1.12 (t, *J* = 7.2 Hz, 3H). <sup>13</sup>C NMR (100 MHz, Chloroform-*d*) δ 175.7, 140.9, 139.1, 133.1, 132.2, 130.1, 126.4, 122.2, 121.9, 118.8, 117.0, 116.4, 116.3, 109.4, 97.1, 62.1, 60.9, 54.9, 45.4, 25.0, 14.1. HRMS (ESI<sup>+</sup>) Calcd. For C<sub>23</sub>H<sub>23</sub>BrN<sub>2</sub>O<sub>2</sub> ([M+H]<sup>+</sup>): 439.1016, found: 439.1005. The product was analyzed by HPLC to determine the enantiomeric excess: 99% ee (Chiralpak AD-H, *i*-propanol/hexane = 20/80, flow rate 1.0 mL/min, λ = 254 nm); t<sub>r</sub> = 5.82 and 9.52 min.

### Ethyl (1*S*,3*R*,4*R*)-1-(4-fluorophenyl)-3-methyl-4-vinyl-1,2,3,4-tetrahydropyrido[4,3-*b*]indolizine-3-carboxylate (1*S*,3*R*,4*R*)-3c

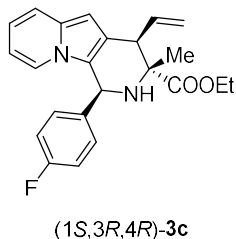

Yield (85%); >20:1 dr; yellow oil.  $[\alpha]_D^{20} = -73.6$  (*c* 0.5, CH<sub>2</sub>Cl<sub>2</sub>); <sup>1</sup>H NMR (400 MHz, Chloroform-*d*) δ 7.29 - 7.24 (m, 3H), 7.04 - 6.97 (m, 3H), 6.57 - 6.51 (m, 1H), 6.31 (s, 1H), 6.21 - 6.09 (m, 2H), 5.47 (s, 1H), 5.29 - 5.22 (m, 1H), 5.18 - 5.13 (m, 1H), 4.11 - 4.05 (m, 2H), 4.05 - 3.99 (m, 1H), 1.34 (s, 3H), 1.12 (t, *J* = 7.2 Hz, 3H). <sup>13</sup>C NMR (100 MHz, Chloroform-*d*) δ 175.7, 162.4 (d, *J* = 244.9 Hz), 139.1, 137.5 (d, *J* = 3.0 Hz), 133.0, 130.0 (d, *J* = 8.1 Hz), 126.3, 122.2, 118.8, 117.4, 116.3 (d, *J* = 2.3 Hz), 116.0, 115.8, 109.3, 97.0, 62.1, 60.8, 54.8, 45.4, 24.9, 14.1. <sup>19</sup>F NMR (376 MHz, Chloroform-*d*) δ -114.09. HRMS (ESI<sup>+</sup>) Calcd. For C<sub>23</sub>H<sub>23</sub>FN<sub>2</sub>O<sub>2</sub> ([M+H]<sup>+</sup>): 379.1816, found: 379.1810. The product was analyzed by HPLC to determine the enantiomeric excess: 99% ee (Chiralpak AD-H, *i*-propanol/hexane = 10/90, flow rate 1.0 mL/min, λ = 254 nm); t<sub>r</sub> = 4.93 and 7.49 min.

**Ethyl (1*S*,3*R*,4*R*)-3-methyl-1-phenyl-4-vinyl-1,2,3,4-tetrahydropyrido[4,3-*b*]indolizine-3-carboxylate (1*S*,3*R*,4*R*)-3d**

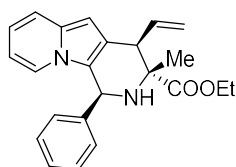

(1*S*,3*R*,4*R*)-3d

Yield (88%); >20:1 dr; yellow solid; m.p. = 106 - 108 °C.  $[\alpha]_D^{20} = -264.0$  (*c* 0.3, CH<sub>2</sub>Cl<sub>2</sub>); <sup>1</sup>H NMR (400 MHz, Chloroform-*d*)  $\delta$  7.36 – 7.26 (m, 6H), 7.04 – 6.99 (m, 1H), 6.55 – 6.50 (m, 1H), 6.31 (s, 1H), 6.22 – 6.15 (m, 1H), 6.15 – 6.11 (m, 1H), 5.47 (s, 1H), 5.26 (dd, *J* = 17.2, 2.0 Hz, 1H), 5.15 (dd, *J* = 10.0, 2.0 Hz, 1H), 4.14 – 4.05 (m, 2H), 4.06 – 3.99 (m, 1H), 1.34 (s, 3H), 1.13 (t, *J* = 7.2 Hz, 3H). <sup>13</sup>C NMR (100 MHz, Chloroform-*d*)  $\delta$  175.7, 141.6, 139.2, 132.9, 129.0, 128.4, 128.3, 128.1, 126.3, 122.40, 118.7, 117.6, 116.2, 109.2, 97.0, 62.1, 60.8, 55.6, 45.5, 25.0, 14.1. HRMS (ESI+) Calcd. For C<sub>23</sub>H<sub>24</sub>N<sub>2</sub>O<sub>2</sub> ([M+H]<sup>+</sup>): 361.1910, found: 361.1907. The product was analyzed by HPLC to determine the enantiomeric excess: 99% ee (Chiralpak AD-H, *i*-propanol/hexane = 5/95, flow rate 1.0 mL/min,  $\lambda$  = 254 nm); *t<sub>r</sub>* = 6.44 and 12.07 min.

**Ethyl (1*S*,3*R*,4*R*)-3-methyl-1-(*p*-tolyl)-4-vinyl-1,2,3,4-tetrahydropyrido[4,3-*b*]indolizine-3-carboxylate (1*S*,3*R*,4*R*)-3e**

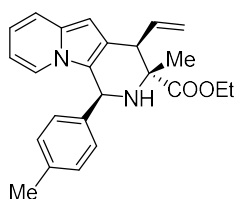

(1*S*,3*R*,4*R*)-3e

Yield (95%); >20:1 dr; yellow oil.  $[\alpha]_D^{20} = -194.4$  (*c* 0.5, CH<sub>2</sub>Cl<sub>2</sub>); <sup>1</sup>H NMR (400 MHz, Chloroform-*d*)  $\delta$  7.28 – 7.25 (m, 1H), 7.18 – 7.10 (m, 4H), 7.06 – 7.02 (m, 1H), 6.55 – 6.49 (m, 1H), 6.31 (s, 1H), 6.21 – 6.14 (m, 1H), 6.15 – 6.11 (m, 1H), 5.42 (s, 1H), 5.25 (dd, *J* = 17.2, 1.0 Hz, 1H), 5.14 (dd, *J* = 10.0, 2.0 Hz, 1H), 4.13 – 4.03 (m, 2H), 4.05 – 3.98 (m, 1H), 2.33 (s, 3H), 1.33 (s, 3H), 1.12 (t, *J* = 7.2 Hz, 3H). <sup>13</sup>C NMR (100 MHz, Chloroform-*d*)  $\delta$  175.8, 139.4, 138.7, 137.8, 132.9, 129.7, 128.2, 126.3, 122.5, 118.7, 117.8, 116.10, 116.05, 109.1, 96.9, 62.1, 60.8, 55.2, 45.5, 25.0, 21.2, 14.1. HRMS (ESI+) Calcd. For C<sub>24</sub>H<sub>26</sub>N<sub>2</sub>O<sub>2</sub> ([M+H]<sup>+</sup>): 375.2067, found: 375.2063. The product was analyzed by HPLC to determine the enantiomeric excess: 99% ee (Chiralpak AD-H, *i*-propanol/hexane = 5/95, flow rate 1.0

mL/min,  $\lambda = 254$  nm);  $t_r = 7.84$  and 11.78 min.

**Ethyl (1*S*,3*R*,4*R*)-1-(4-methoxyphenyl)-3-methyl-4-vinyl-1,2,3,4-tetrahydropyrido[4,3-*b*]indolizine-3-carboxylate (1*S*,3*R*,4*R*)-3f**

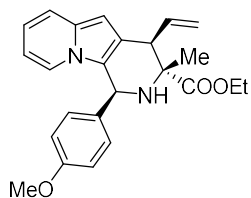

(1*S*,3*R*,4*R*)-3f

Yield (92%); >20:1 dr; yellow oil.  $[\alpha]_D^{20} = -127.2$  ( $c$  0.5,  $\text{CH}_2\text{Cl}_2$ );  $^1\text{H NMR}$  (400 MHz, Chloroform-*d*)  $\delta$  7.28 – 7.26 (m, 1H), 7.23 – 7.18 (m, 2H), 7.03 – 7.07 (m, 1H), 6.88 – 6.83 (m, 2H), 6.56 – 6.50 (m, 1H), 6.30 (s, 1H), 6.21 – 6.15 (m, 1H), 6.16 – 6.11 (m, 1H), 5.42 (s, 1H), 5.25 (dd,  $J = 17.2, 2.0$  Hz, 1H), 5.15 (dd,  $J = 10.0, 2.0$  Hz, 1H), 4.13 – 4.04 (m, 2H), 4.04 – 4.00 (m, 1H), 3.79 (s, 3H), 1.33 (s, 3H), 1.13 (t,  $J = 7.2$  Hz, 3H).  $^{13}\text{C NMR}$  (100 MHz, Chloroform-*d*)  $\delta$  175.8, 159.4, 139.3, 133.8, 132.9, 129.4, 126.3, 122.6, 122.5, 118.7, 117.9, 116.1, 114.4, 109.1, 96.9, 62.1, 60.8, 55.3, 54.9, 45.5, 25.1, 14.2. HRMS (ESI+) Calcd. For  $\text{C}_{24}\text{H}_{26}\text{N}_2\text{O}_3$  ( $[\text{M}+\text{H}]^+$ ): 391.2016, found: 391.2010. The product was analyzed by HPLC to determine the enantiomeric excess: 99% ee (Chiralpak AD-H, *i*-propanol/hexane = 20/80, flow rate 1.0 mL/min,  $\lambda = 254$  nm);  $t_r = 6.35$  and 8.56 min.

**Ethyl (1*S*,3*R*,4*R*)-3-methyl-1-(*m*-tolyl)-4-vinyl-1,2,3,4-tetrahydropyrido[4,3-*b*]indolizine-3-carboxylate (1*S*,3*R*,4*R*)-3g**

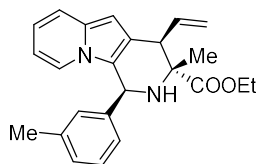

(1*S*,3*R*,4*R*)-3g

Yield (90%); >20:1 dr; yellow oil.  $[\alpha]_D^{20} = -143.2$  ( $c$  0.3,  $\text{CH}_2\text{Cl}_2$ );  $^1\text{H NMR}$  (400 MHz, Chloroform-*d*)  $\delta$  7.29 – 7.25 (m, 1H), 7.23 – 7.18 (m, 1H), 7.13 – 7.01 (m, 4H), 6.57 – 6.49 (m, 1H), 6.31 (s, 1H), 6.22 – 6.15 (m, 1H), 6.16 – 6.11 (m, 1H), 5.41 (s, 1H), 5.26 (dd,  $J = 17.2, 2.0$  Hz, 1H), 5.15 (dd,  $J = 10.0, 2.0$  Hz, 1H), 4.14 – 4.04 (m, 2H), 4.05 – 4.00 (m, 1H), 2.31 (s, 3H), 1.34 (s, 3H), 1.13 (t,  $J = 7.2$  Hz, 3H).  $^{13}\text{C NMR}$  (100 MHz, Chloroform-*d*)  $\delta$  175.7, 141.5, 139.3, 138.7, 132.92, 129.0, 128.90, 128.87, 126.3, 125.3, 122.5, 118.7, 117.7, 116.2, 116.1, 109.1, 96.9, 62.1, 60.8, 55.6, 45.5, 25.1, 21.4,

14.1. HRMS (ESI+) Calcd. For C<sub>24</sub>H<sub>26</sub>N<sub>2</sub>O<sub>2</sub> ([M+H]<sup>+</sup>): 375.2067, found: 375.2063. The product was analyzed by HPLC to determine the enantiomeric excess: 99% ee (Chiralpak AD-H, *i*-propanol/hexane = 5/95, flow rate 1.0 mL/min, λ = 254 nm); t<sub>r</sub> = 5.93 and 11.13 min.

**Ethyl (1*S*,3*R*,4*R*)-1-(3-methoxyphenyl)-3-methyl-4-vinyl-1,2,3,4-tetrahydropyrido[4,3-*b*]indolizine-3-carboxylate (1*S*,3*R*,4*R*)-3h**

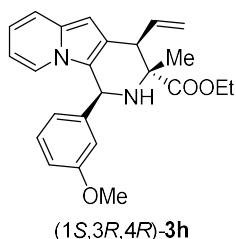

Yield (91%); >20:1 dr; yellow oil. [α]<sup>20</sup><sub>D</sub> = -146.5 (*c* 0.15, CH<sub>2</sub>Cl<sub>2</sub>); <sup>1</sup>H NMR (400 MHz, Chloroform-*d*) δ 7.29 – 7.25 (m, 1H), 7.25 – 7.21 (m, 1H), 7.08 – 7.04 (m, 1H), 6.89 – 6.82 (m, 3H), 6.56 – 6.50 (m, 1H), 6.30 (s, 1H), 6.22 – 6.16 (m, 1H), 6.17 – 6.11 (m, 1H), 5.43 (s, 1H), 5.25 (dd, *J* = 17.2, 2.0 Hz, 1H), 5.15 (dd, *J* = 10.0, 2.0 Hz, 1H), 4.13 – 4.04 (m, 2H), 4.05 – 3.99 (m, 1H), 3.75 (s, 3H), 1.35 (s, 3H), 1.12 (t, *J* = 7.2 Hz, 3H). <sup>13</sup>C NMR (100 MHz, Chloroform-*d*) δ 175.8, 160.1, 143.4, 139.2, 133.0, 130.0, 126.2, 122.5, 120.6, 118.7, 117.5, 116.22, 116.19, 113.9, 113.5, 109.2, 97.0, 62.1, 60.8, 55.6, 55.2, 45.5, 25.0, 14.1. HRMS (ESI+) Calcd. For C<sub>24</sub>H<sub>26</sub>N<sub>2</sub>O<sub>3</sub> ([M+H]<sup>+</sup>): 391.2016, found: 391.2008. The product was analyzed by HPLC to determine the enantiomeric excess: 99% ee (Chiralpak AD-H, *i*-propanol/hexane = 80/20, flow rate 1.0 mL/min, λ = 254 nm); t<sub>r</sub> = 4.48 and 6.22 min.

**Ethyl (1*S*,3*R*,4*R*)-3-methyl-1-(*o*-tolyl)-4-vinyl-1,2,3,4-tetrahydropyrido[4,3-*b*]indolizine-3-carboxylate (1*S*,3*R*,4*R*)-3i**

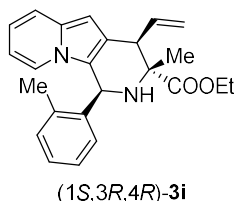

Yield (87%); >20:1 dr; yellow oil. [α]<sup>20</sup><sub>D</sub> = -175.0 (*c* 0.1, CH<sub>2</sub>Cl<sub>2</sub>); <sup>1</sup>H NMR (400 MHz, Chloroform-*d*) δ 7.31 – 7.24 (m, 2H), 7.21 – 7.16 (m, 1H), 7.08 – 7.00 (m, 1H), 6.87 – 6.78 (m, 2H), 6.56 – 6.48 (m, 1H), 6.33 (s, 1H), 6.19 – 6.13 (m, 1H), 6.14 – 6.08 (m, 1H), 5.74 (s, 1H), 5.24 (dd, *J* = 17.0 Hz,

2.0, 1H), 5.13 (dd,  $J = 10.0, 2.0$  Hz, 1H), 4.16 – 4.06 (m, 2H), 4.07 – 3.99 (m, 1H), 2.67 (s, 3H), 1.34 (s, 3H), 1.17 (t,  $J = 7.2$  Hz, 3H).  $^{13}\text{C}$  NMR (100 MHz, Chloroform-*d*)  $\delta$  175.7, 139.2, 138.7, 136.1, 132.8, 130.8, 127.8, 127.7, 127.0, 126.7, 122.4, 118.7, 117.9, 116.1, 116.0, 109.2, 97.1, 62.0, 60.8, 50.9, 45.4, 25.1, 18.9, 14.2. HRMS (ESI+) Calcd. For  $\text{C}_{24}\text{H}_{26}\text{N}_2\text{O}_2$  ( $[\text{M}+\text{H}]^+$ ): 375.2067, found: 375.2063. The product was analyzed by HPLC to determine the enantiomeric excess: 99% ee (Chiralpak AD-H, *i*-propanol/hexane = 5/95, flow rate 1.0 mL/min,  $\lambda = 254$  nm);  $t_{\text{r}} = 4.06$  and 4.63 min.

**Ethyl (1*S*,3*R*,4*R*)-3-methyl-1-(naphthalen-1-yl)-4-vinyl-1,2,3,4-tetrahydropyrido[4,3-*b*]indolizine-3-carboxylate (1*S*,3*R*,4*R*)-3j**

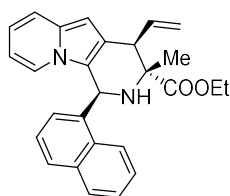

(1*S*,3*R*,4*R*)-3j

Yield (86%); >20:1 dr; yellow oil.  $[\alpha]_{\text{D}}^{20} = -346.0$  ( $c$  0.05,  $\text{CH}_2\text{Cl}_2$ );  $^1\text{H}$  NMR (400 MHz, Chloroform-*d*)  $\delta$  8.57 (d,  $J = 8.4$  Hz, 1H), 7.93 (d,  $J = 8.0$  Hz, 1H), 7.80 (d,  $J = 8.0$  Hz, 1H), 7.70 - 7.63 (m, 1H), 7.60 - 7.52 (m, 1H), 7.35 - 7.27 (m, 2H), 6.95 (d,  $J = 7.2$  Hz, 1H), 6.82 (d,  $J = 7.2$  Hz, 1H), 6.58 - 6.51 (m, 1H), 6.39 (s, 1H), 6.39 - 6.34 (m, 1H), 6.16 - 6.08 (m, 1H), 6.09 - 6.03 (m, 1H), 5.25 (dd,  $J = 17.2, 2.0$  Hz, 1H), 5.14 (dd,  $J = 10.0, 2.0$  Hz, 1H), 4.21 - 4.11 (m, 2H), 4.12 - 4.04 (m, 1H), 1.34 (s, 3H), 1.20 (t,  $J = 7.2$  Hz, 3H).  $^{13}\text{C}$  NMR (100 MHz, Chloroform-*d*)  $\delta$  175.8, 139.0, 135.9, 134.3, 133.1, 131.9, 129.1, 128.3, 127.2, 126.8, 126.1, 125.8, 124.8, 123.0, 118.7, 117.1, 116.4, 116.1, 115.8, 109.1, 97.2, 62.3, 60.9, 50.3, 45.6, 25.0, 14.2. HRMS (ESI+) Calcd. For  $\text{C}_{27}\text{H}_{26}\text{N}_2\text{O}_2$  ( $[\text{M}+\text{H}]^+$ ): 411.2067, found: 411.2066. The product was analyzed by HPLC to determine the enantiomeric excess: 99% ee (Chiralpak AD-H, *i*-propanol/hexane = 5/95, flow rate 1.0 mL/min,  $\lambda = 254$  nm);  $t_{\text{r}} = 4.64$  and 6.20 min.

**Ethyl (1*S*,3*R*,4*R*)-3-methyl-1-(naphthalen-2-yl)-4-vinyl-1,2,3,4-tetrahydropyrido[4,3-*b*]indolizine-3-carboxylate (1*S*,3*R*,4*R*)-3k**

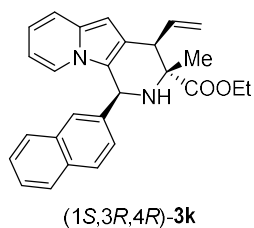

Yield (95%); >20:1 dr; yellow solid; m.p. = 154- 156 °C.  $[\alpha]_D^{20} = -42.4$  (*c* 0.2, CH<sub>2</sub>Cl<sub>2</sub>); <sup>1</sup>H NMR (400 MHz, Chloroform-*d*) δ 7.88 (s, 1H), 7.85 – 7.79 (m, 2H), 7.77 – 7.73 (m, 1H), 7.50 – 7.44 (m, 2H), 7.31 – 7.25 (m, 2H), 7.09 – 7.04 (m, 1H), 6.53 – 6.46 (m, 1H), 6.35 (s, 1H), 6.29 – 6.18 (m, 1H), 6.09 – 6.04 (m, 1H), 5.64 (s, 1H), 5.31 (dd, *J* = 17.2, 2.0 Hz, 1H), 5.18 (dd, *J* = 10.0, 2.0 Hz, 1H), 4.16 – 4.08 (m, 2H), 4.09 – 4.03 (m, 1H), 1.35 (s, 3H), 1.15 (t, *J* = 7.2 Hz, 3H). <sup>13</sup>C NMR (100 MHz, Chloroform-*d*) δ 175.8, 139.31, 139.29, 133.5, 133.3, 133.0, 129.1, 127.8, 127.7, 127.4, 126.5, 126.1, 126.0, 125.9, 122.4, 118.7, 117.4, 116.3, 116.1, 109.3, 97.0, 62.1, 60.8, 55.8, 45.6, 25.0, 14.2. HRMS (ESI+) Calcd. For C<sub>27</sub>H<sub>26</sub>N<sub>2</sub>O<sub>2</sub> ([M+H]<sup>+</sup>): 411.2067, found: 411.2062. The product was analyzed by HPLC to determine the enantiomeric excess: 99% ee (Chiralpak IE, *i*-propanol/hexane = 5/95, flow rate 1.0 mL/min, λ = 250 nm); t<sub>r</sub> = 6.65 and 7.10 min.

**Ethyl (1R,3S,4S)-3-methyl-1-(naphthalen-2-yl)-4-vinyl-1,2,3,4-tetrahydropyrido[4,3-*b*]indolizine-3-carboxylate (1R,3S,4S)-3k**

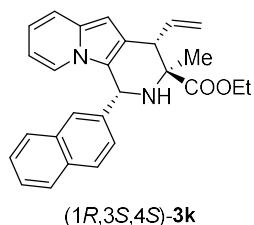

Yield (93%); >20:1 dr; yellow oil.  $[\alpha]_D^{20} = +43.5$  (*c* 0.2, CH<sub>2</sub>Cl<sub>2</sub>). The product was analyzed by HPLC to determine the enantiomeric excess: 99% ee (Chiralpak IE, *i*-propanol/hexane = 5/95, flow rate 1.0 mL/min, λ = 250 nm); t<sub>r</sub> = 6.65 and 7.10 min.

**Ethyl (1R,3R,4S)-3-methyl-1-(naphthalen-2-yl)-4-vinyl-1,2,3,4-tetrahydropyrido[4,3-*b*]indolizine-3-carboxylate (1R,3R,4S)-3k**

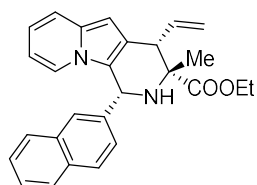

(1R,3R,4S)-3k

Yield (92%); >20:1 dr; yellow oil.  $[\alpha]_D^{20} = +143.0$  (*c* 0.2, CH<sub>2</sub>Cl<sub>2</sub>); <sup>1</sup>H NMR (400 MHz, Chloroform-*d*) δ 7.84 – 7.78 (m, 3H), 7.78 – 7.74 (m, 1H), 7.50 – 7.44 (m, 2H), 7.33 - 7.26 (m, 2H), 7.12 – 7.07 (m, 1H), 6.55 – 6.48 (m, 1H), 6.40 – 6.31 (m, 1H), 6.33 (s, 1H), 6.14 – 6.09 (m, 1H), 5.60 (s, 1H), 5.39 – 5.34 (m, 1H), 5.34 – 5.31 (m, 1H), 4.13 – 4.04 (m, 2H), 3.84 (d, *J* = 10.0 Hz, 1H), 1.46 (s, 3H), 1.15 (t, *J* = 7.2 Hz, 3H). <sup>13</sup>C NMR (100 MHz, Chloroform-*d*) δ 174.4, 139.2, 137.6, 133.5, 133.3, 132.7, 129.1, 127.9, 127.7, 127.3, 126.5, 126.1, 126.04, 126.02, 122.0, 118.73, 118.65, 117.2, 115.8, 109.5, 96.3, 62.8, 60.5, 56.0, 51.2, 25.2, 14.2. HRMS (ESI+) Calcd. For C<sub>27</sub>H<sub>26</sub>N<sub>2</sub>O<sub>2</sub> ([M+H]<sup>+</sup>): 411.2067, found: 411.2061. The product was analyzed by HPLC to determine the enantiomeric excess: 99% ee (Chiralpak IE, *i*-propanol/hexane = 5/95, flow rate 0.5 mL/min, λ = 254 nm); *t<sub>r</sub>* = 13.66 and 14.48 min.

**Ethyl (1S,3S,4R)-3-methyl-1-(naphthalen-2-yl)-4-vinyl-1,2,3,4-tetrahydropyrido[4,3-*b*]indolizine-3-carboxylate (1S,3S,4R)-3k**

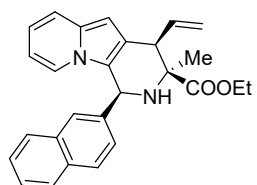

(1S,3S,4R)-3k

Yield (93%); >20:1 dr; yellow oil.  $[\alpha]_D^{20} = -149.0$  (*c* 0.2, CH<sub>2</sub>Cl<sub>2</sub>). The product was analyzed by HPLC to determine the enantiomeric excess: 99% ee (Chiralpak IE, *i*-propanol/hexane = 5/95, flow rate 0.5 mL/min, λ = 254 nm); *t<sub>r</sub>* = 13.66 and 14.48 min.

**Ethyl (1S,3R,4R)-3-methyl-1-(thiophen-2-yl)-4-vinyl-1,2,3,4-tetrahydropyrido[4,3-*b*]indolizine-3-carboxylate (1S,3R,4R)-3l**

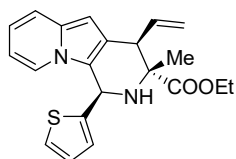

(1S,3R,4R)-3l



Yield (82%); >20:1 dr; yellow oil.  $[\alpha]_D^{20} = -192.5$  (*c* 0.2, CH<sub>2</sub>Cl<sub>2</sub>); <sup>1</sup>H NMR (400 MHz, Chloroform-*d*) δ 7.30 – 7.26 (m, 2H), 7.24 – 7.21 (m, 1H), 7.17 – 7.14 (m, 1H), 6.94 – 6.98 (m, 1H), 6.59 – 6.53 (m, 1H), 6.28 (s, 1H), 6.27 – 6.22 (m, 1H), 6.21 – 6.11 (m, 1H), 5.84 (s, 1H), 5.23 (dd, *J* = 17.2, 2.0 Hz, 1H), 5.16 (dd, *J* = 10.0, 2.0 Hz, 1H), 4.11 – 4.02 (m, 2H), 4.03 – 3.96 (m, 1H), 1.35 (s, 3H), 1.09 (t, *J* = 7.2 Hz, 3H). <sup>13</sup>C NMR (100 MHz, Chloroform-*d*) δ 175.7, 146.7, 138.9, 133.1, 126.3, 126.1, 126.0, 125.7, 122.2, 118.7, 117.5, 116.5, 116.4, 109.4, 96.9, 62.2, 60.8, 50.3, 45.5, 24.8, 14.1. HRMS (ESI+) Calcd. For C<sub>21</sub>H<sub>22</sub>N<sub>2</sub>O<sub>2</sub>S ([M+H]<sup>+</sup>): 367.1474, found: 367.1470. The product was analyzed by HPLC to determine the enantiomeric excess: 99% ee (Chiralpak AD-H, *i*-propanol/hexane = 5/95, flow rate 1.0 mL/min, λ = 254 nm); t<sub>r</sub> = 8.02 and 12.30 min.

**Ethyl (1*S*,3*R*,4*R*)-1-(furan-2-yl)-3-methyl-4-vinyl-1,2,3,4-tetrahydropyrido[4,3-*b*]indolizine-3-carboxylate (1*S*,3*R*,4*R*)-3m**

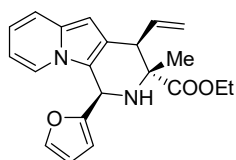

(1*S*,3*R*,4*R*)-3m

Yield (86%); >20:1 dr; yellow oil.  $[\alpha]_D^{20} = -292.0$  (*c* 0.1, CH<sub>2</sub>Cl<sub>2</sub>); <sup>1</sup>H NMR (400 MHz, Chloroform-*d*) δ 7.37 – 7.34 (m, 1H), 7.31 – 7.26 (m, 2H), 6.60 – 6.54 (m, 1H), 6.34 – 6.31 (m, 1H), 6.31 – 6.27 (m, 1H), 6.28 (s, 1H), 6.28 – 6.24 (m, 1H), 6.19 – 6.07 (m, 1H), 5.67 (s, 1H), 5.21 (dd, *J* = 17.2, 2.0 Hz, 1H), 5.15 (dd, *J* = 10.0, 2.0 Hz, 1H), 4.10 – 4.02 (m, 2H), 4.03 – 3.97 (m, 1H), 1.36 (s, 3H), 1.09 (t, *J* = 7.2 Hz, 3H). <sup>13</sup>C NMR (100 MHz, Chloroform-*d*) δ 175.6, 154.0, 142.6, 138.6, 133.1, 125.9, 122.2, 118.8, 116.7, 116.3, 115.4, 110.3, 109.5, 108.0, 97.0, 62.0, 60.9, 48.6, 45.4, 24.7, 14.1. HRMS (ESI+) Calcd. For C<sub>21</sub>H<sub>22</sub>N<sub>2</sub>O<sub>3</sub> ([M+H]<sup>+</sup>): 351.1703, found: 351.1700. The product was analyzed by HPLC to determine the enantiomeric excess: 99% ee (Chiralpak AD-H, *i*-propanol/hexane = 20/80, flow rate 1.0 mL/min, λ = 254 nm); t<sub>r</sub> = 6.22 and 7.89 min.

**Ethyl (1*S*,3*R*,4*R*)-3-methyl-1-(1-tosyl-1*H*-indol-3-yl)-4-vinyl-1,2,3,4-tetrahydropyrido[4,3-*b*]indolizine-3-carboxylate (1*S*,3*R*,4*R*)-3n**

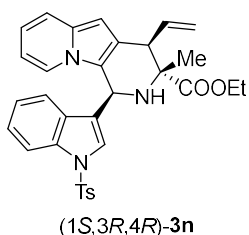

Yield (90%); >20:1 dr; yellow solid; m.p. = 80 - 82 °C.  $[\alpha]_D^{20} = -208.5$  (*c* 0.2, CH<sub>2</sub>Cl<sub>2</sub>); <sup>1</sup>H NMR (400 MHz, Chloroform-*d*) δ 7.97 (d, *J* = 8.4 Hz, 1H), 7.74 (d, *J* = 8.4 Hz, 2H), 7.51 (s, 1H), 7.29 – 7.25 (m, 2H), 7.23 – 7.19 (m, 2H), 7.13 – 7.00 (m, 3H), 6.54 – 6.48 (m, 1H), 6.34 (s, 1H), 6.18 – 6.07 (m, 1H), 6.03 – 5.97 (m, 1H), 5.76 (s, 1H), 5.29 (dd, *J* = 17.2, 2.0 Hz, 1H), 5.15 (dd, *J* = 10.0, 2.0 Hz, 1H), 4.16 – 4.06 (m, 2H), 4.07 – 4.01 (m, 1H), 2.37 (s, 3H), 1.32 (s, 3H), 1.15 (t, *J* = 7.2 Hz, 3H). <sup>13</sup>C NMR (100 MHz, Chloroform-*d*) δ 175.7, 145.0, 138.5, 135.8, 133.1, 129.9, 129.2, 127.0, 126.9, 126.0, 125.1, 125.0, 123.5, 122.5, 122.2, 120.0, 118.8, 116.3, 116.1, 116.0, 113.8, 109.2, 97.3, 61.9, 60.9, 46.9, 45.5, 25.0, 21.6, 14.2. HRMS (ESI+) Calcd. For C<sub>32</sub>H<sub>31</sub>N<sub>3</sub>O<sub>4</sub>S ([M+H]<sup>+</sup>): 554.2108, found: 554.2097. The product was analyzed by HPLC to determine the enantiomeric excess: 99% ee (Chiralpak AD-H, *i*-propanol/hexane = 20/80, flow rate 1.0 mL/min, λ = 254 nm); *t*<sub>r</sub> = 7.18 and 10.49 min.

**Ethyl (1S,3R,4R)-1-cyclohexyl-3-methyl-4-vinyl-1,2,3,4-tetrahydropyrido[4,3-*b*]indolizine-3-carboxylate (1S,3R,4R)-3o**

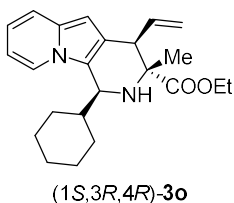

Yield (59%); 10:1 dr; yellow oil.  $[\alpha]_D^{20} = -235.0$  (*c* 0.2, CH<sub>2</sub>Cl<sub>2</sub>); <sup>1</sup>H NMR (400 MHz, Chloroform-*d*) δ 7.66 (d, *J* = 7.2 Hz, 1H), 7.27 (d, *J* = 7.6 Hz, 1H), 6.59 – 6.53 (m, 1H), 6.43 – 6.36 (m, 1H), 6.23 (s, 1H), 6.12 – 6.00 (m, 1H), 5.21 (dd, *J* = 17.2, 2.0 Hz, 1H), 5.07 (dd, *J* = 10.0, 2.0 Hz, 1H), 4.52 – 4.48 (m, 1H), 4.00 – 3.93 (m, 1H), 3.94 – 3.85 (m, 2H), 2.15 – 2.04 (m, 1H), 1.88 – 1.74 (m, 3H), 1.68 – 1.57 (m, 2H), 1.53 – 1.43 (m, 1H), 1.41 – 1.32 (m, 2H), 1.30 (s, 3H), 1.20 – 1.10 (m, 1H), 0.99 (t, *J* = 7.2 Hz, 3H), 0.85 – 0.78 (m, 1H). <sup>13</sup>C NMR (100 MHz, Chloroform-*d*) δ 176.5, 139.3, 132.9, 126.6, 122.6, 119.1, 118.5, 115.5, 115.3, 109.2, 97.1, 61.4, 60.4, 54.5, 46.1, 39.8, 29.9, 27.1, 26.5, 26.4, 26.2, 25.1, 14.1. HRMS (ESI+) Calcd. For C<sub>23</sub>H<sub>30</sub>N<sub>2</sub>O<sub>2</sub> ([M+H]<sup>+</sup>): 367.2380, found: 367.2376. The product was analyzed by HPLC to determine the enantiomeric excess: 96% ee (Chiralpak AD-H, *i*-

propanol/hexane = 5/95, flow rate 1.0 mL/min,  $\lambda = 254$  nm);  $t_r = 4.71$  and 8.48 min.

**Ethyl (1*S*,3*R*,4*R*)-1-butyl-3-methyl-4-vinyl-1,2,3,4-tetrahydropyrido[4,3-*b*]indolizine-3-carboxylate (1*S*,3*R*,4*R*)-3p**

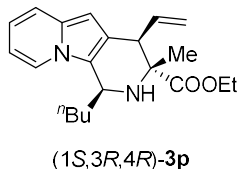

Yield (60%); >20:1 dr; yellow oil.  $[\alpha]_D^{20} = -240.0$  ( $c$  0.3,  $\text{CH}_2\text{Cl}_2$ );  $^1\text{H}$  NMR (400 MHz, Chloroform-*d*)  $\delta$  7.65 – 7.60 (m, 1H), 7.30 – 7.26 (m, 1H), 6.61 – 6.54 (m, 1H), 6.44 – 6.38 (m, 1H), 6.23 (s, 1H), 6.12 – 6.01 (m, 1H), 5.20 – 5.13 (m, 1H), 5.13 – 5.09 (m, 1H), 4.57 – 4.52 (m, 1H), 4.03 – 3.97 (m, 1H), 3.97 – 3.89 (m, 2H), 2.00 – 1.93 (m, 1H), 1.79 – 1.67 (m, 1H), 1.53 – 1.36 (m, 2H), 1.35 (s, 3H), 1.34 – 1.25 (m, 2H), 1.01 (t,  $J = 7.2$  Hz, 3H), 0.90 (t,  $J = 7.2$  Hz, 3H).  $^{13}\text{C}$  NMR (100 MHz, Chloroform-*d*)  $\delta$  176.0, 138.9, 132.7, 125.4, 122.1, 119.5, 119.1, 116.2, 115.5, 109.3, 97.0, 61.7, 60.6, 49.7, 45.8, 34.0, 27.3, 24.8, 22.8, 14.06, 14.04. HRMS (ESI+) Calcd. For  $\text{C}_{21}\text{H}_{28}\text{N}_2\text{O}_2$  ( $[\text{M}+\text{H}]^+$ ): 341.2223, found: 341.2222. The product was analyzed by HPLC to determine the enantiomeric excess: 99% ee (Chiralpak IA, *i*-propanol/hexane = 1/99, flow rate 0.3 mL/min,  $\lambda = 254$  nm);  $t_r = 26.21$  and 30.68 min.

**Ethyl (1*S*,3*R*,4*R*)-3-butyl-1-(4-chlorophenyl)-4-vinyl-1,2,3,4-tetrahydropyrido[4,3-*b*]indolizine-3-carboxylate (1*S*,3*R*,4*R*)-3q**

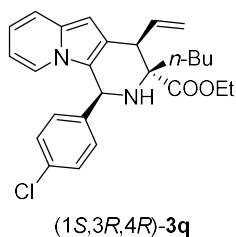

Yield (93%); >20:1 dr; yellow oil.  $[\alpha]_D^{20} = -103.0$  ( $c$  0.2,  $\text{CH}_2\text{Cl}_2$ );  $^1\text{H}$  NMR (400 MHz, Chloroform-*d*)  $\delta$  7.33 – 7.26 (m, 3H), 7.24 – 7.20 (m, 2H), 6.99 (m, 1H), 6.57 – 6.51 (m, 1H), 6.31 (s, 1H), 6.20 – 6.14 (m, 1H), 6.16 – 6.08 (m, 1H), 5.40 (s, 1H), 5.27 (dd,  $J = 17.2, 2.0$  Hz, 1H), 5.13 (dd,  $J = 10.0, 2.0$  Hz, 1H), 4.12 – 4.04 (m, 2H), 4.05 – 3.99 (m, 1H), 1.81 – 1.69 (m, 1H), 1.60 – 1.48 (m, 1H), 1.30 – 1.23 (m, 4H), 1.11 (t,  $J = 7.2$  Hz, 3H), 0.87 (t,  $J = 6.8$  Hz, 3H).  $^{13}\text{C}$  NMR (100 MHz, Chloroform-*d*)  $\delta$  174.6, 140.4, 139.2, 133.7, 133.1, 129.8, 129.2, 126.6, 122.2, 118.8, 117.3, 116.3, 115.8, 109.3, 97.0, 65.4, 60.6, 54.9, 44.5, 37.6, 25.5, 22.9, 14.3, 13.9. HRMS (ESI+) Calcd. For  $\text{C}_{26}\text{H}_{29}\text{ClN}_2\text{O}_2$  ( $[\text{M}+\text{H}]^+$ ):

437.1990, found: 437.1979. The product was analyzed by HPLC to determine the enantiomeric excess: 99% ee (Chiralpak AD-H, *i*-propanol/hexane = 5/95, flow rate 1.0 mL/min,  $\lambda$  = 254 nm);  $t_r$  = 9.50 and 13.47 min.

**Ethyl (1*S*,3*R*,4*R*)-1-(4-chlorophenyl)-3-isobutyl-4-vinyl-1,2,3,4-tetrahydropyrido[4,3-*b*]indolizine-3-carboxylate (1*S*,3*R*,4*R*)-3r**

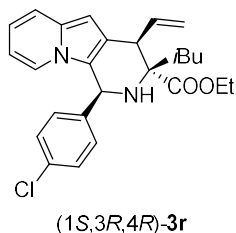

Yield (88%); >20:1 dr; yellow oil.  $[\alpha]_D^{20}$  = -115.5 (*c* 0.2, CH<sub>2</sub>Cl<sub>2</sub>); <sup>1</sup>H NMR (400 MHz, Chloroform-*d*)  $\delta$  7.32 – 7.26 (m, 3H), 7.24 – 7.19 (m, 2H), 7.02 – 6.96 (m, 1H), 6.58 – 6.51 (m, 1H), 6.30 (s, 1H), 6.21 – 6.15 (m, 1H), 6.16 – 6.08 (m, 1H), 5.42 (s, 1H), 5.25 (dd, *J* = 17.2, 2.0 Hz, 1H), 5.13 (dd, *J* = 10.0, 2.0 Hz, 1H), 4.13 – 4.09 (m, 1H), 4.02 (q, *J* = 7.2 Hz, 2H), 1.82 – 1.71 (m, 2H), 1.49 – 1.41 (m, 1H), 1.10 (t, *J* = 7.2 Hz, 3H), 0.92 – 0.87 (m, 6H). <sup>13</sup>C NMR (100 MHz, Chloroform-*d*)  $\delta$  174.7, 140.4, 139.4, 133.7, 133.0, 129.8, 129.2, 126.6, 122.2, 118.8, 117.2, 116.3, 115.9, 109.3, 96.9, 65.1, 60.6, 54.8, 46.9, 45.6, 24.4, 24.0, 23.7, 14.1. HRMS (ESI+) Calcd. For C<sub>26</sub>H<sub>29</sub>ClN<sub>2</sub>O<sub>2</sub> ([M+H]<sup>+</sup>): 437.1990, found: 437.1981. The product was analyzed by HPLC to determine the enantiomeric excess: 99% ee (Chiralpak AD-H, *i*-propanol/hexane = 5/95, flow rate 1.0 mL/min,  $\lambda$  = 254 nm);  $t_r$  = 7.83 and 10.38 min.

**Ethyl (1*S*,3*R*,4*R*)-3-benzyl-1-(4-chlorophenyl)-4-vinyl-1,2,3,4-tetrahydropyrido[4,3-*b*]indolizine-3-carboxylate (1*S*,3*R*,4*R*)-3s**

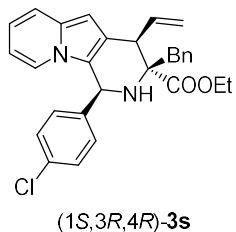

Yield (96%); >20:1 dr; yellow solid; m.p. = 62 - 64 °C.  $[\alpha]_D^{20}$  = -120.5 (*c* 0.2, CH<sub>2</sub>Cl<sub>2</sub>); <sup>1</sup>H NMR (400 MHz, Chloroform-*d*)  $\delta$  7.32 – 7.25 (m, 4H), 7.24 – 7.19 (m, 4H), 7.11 – 7.07 (m, 2H), 7.00 - 6.97 (m, 1H), 6.56 – 6.50 (m, 1H), 6.37 – 6.26 (m, 1H), 6.30 (s, 1H), 6.19 – 6.14 (m, 1H), 5.38 (dd, *J* = 17.2

Hz, 2.0 Hz, 1H), 5.36 (s, 1H), 5.23 (dd,  $J = 10.0$  Hz, 2.0 Hz, 1H), 4.20 – 4.14 (m, 1H), 3.94 – 3.82 (m, 2H), 3.08 (d,  $J = 13.6$  Hz, 1H), 2.88 (d,  $J = 13.6$  Hz, 1H), 0.97 (t,  $J = 7.2$  Hz, 3H).  $^{13}\text{C}$  NMR (100 MHz, Chloroform- $d$ )  $\delta$  173.9, 140.7, 139.6, 136.0, 133.6, 133.1, 129.9, 129.8, 129.1, 128.4, 127.0, 126.2, 122.1, 118.8, 117.5, 116.4, 116.2, 109.4, 96.7, 66.4, 60.5, 54.9, 46.1, 44.2, 14.0. HRMS (ESI+) Calcd. For  $\text{C}_{29}\text{H}_{27}\text{ClN}_2\text{O}_2$  ( $[\text{M}+\text{H}]^+$ ): 471.1833, found: 471.1816. The product was analyzed by HPLC to determine the enantiomeric excess: 99% ee (Chiralpak AD-H, *i*-propanol/hexane = 5/95, flow rate 1.0 mL/min,  $\lambda = 254$  nm);  $t_r = 8.41$  and 34.84 min.

**Ethyl (1*S*,3*R*,4*R*)-1-(4-chlorophenyl)-3-phenethyl-4-vinyl-1,2,3,4-tetrahydropyrido[4,3-*b*]indolizine-3-carboxylate (1*S*,3*R*,4*R*)-3t**

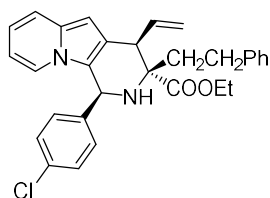

(1*S*,3*R*,4*R*)-3t

Yield (85%); >20:1 dr; yellow solid; m.p. = 61 - 62 °C.  $[\alpha]_D^{20} = -172.0$  ( $c$  0.2,  $\text{CH}_2\text{Cl}_2$ );  $^1\text{H}$  NMR (400 MHz, Chloroform- $d$ )  $\delta$  7.32 – 7.25 (m, 4H), 7.25 – 7.11 (m, 6H), 7.02 – 6.98 (m, 1H), 6.59 – 6.53 (m, 1H), 6.33 (s, 1H), 6.23 – 6.18 (m, 1H), 6.19 – 6.12 (m, 1H), 5.43 (s, 1H), 5.33 (dd,  $J = 17.2$ , 2.0 Hz, 1H), 5.17 (dd,  $J = 10.0$ , 2.0 Hz, 1H), 4.20 – 4.16 (m, 1H), 4.14 – 4.04 (m, 2H), 2.73 – 2.62 (m, 1H), 2.62 – 2.51 (m, 1H), 2.10 – 2.00 (m, 1H), 1.90 – 1.80 (m, 1H), 1.15 (t,  $J = 7.2$  Hz, 3H).  $^{13}\text{C}$  NMR (100 MHz, Chloroform- $d$ )  $\delta$  174.4, 141.3, 140.3, 139.0, 133.8, 133.1, 129.8, 129.2, 128.4, 128.3, 126.3, 126.0, 122.2, 118.8, 117.2, 116.4, 116.1, 109.4, 97.0, 65.3, 60.9, 54.9, 44.6, 39.7, 29.9, 14.4. HRMS (ESI+) Calcd. For  $\text{C}_{30}\text{H}_{29}\text{ClN}_2\text{O}_2$  ( $[\text{M}+\text{H}]^+$ ): 485.1990, found: 485.1980. The product was analyzed by HPLC to determine the enantiomeric excess: 99% ee (Chiralpak AD-H, *i*-propanol/hexane = 5/95, flow rate 1.0 mL/min,  $\lambda = 254$  nm);  $t_r = 12.45$  and 27.72 min.

**Ethyl (1*S*,3*R*,4*R*)-3-allyl-1-(4-chlorophenyl)-4-vinyl-1,2,3,4-tetrahydropyrido[4,3-*b*]indolizine-3-carboxylate (1*S*,3*R*,4*R*)-3u**

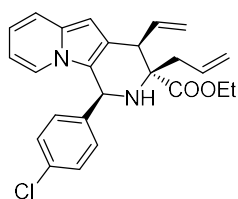

(1S,3R,4R)-3u

Yield (96%); >20:1 dr; yellow oil.  $[\alpha]_D^{20} = -328.0$  (*c* 0.05, CH<sub>2</sub>Cl<sub>2</sub>); <sup>1</sup>H NMR (400 MHz, Chloroform-*d*) δ 7.33 – 7.26 (m, 3H), 7.24 – 7.20 (m, 2H), 7.03 – 6.98 (m, 1H), 6.58 – 6.52 (m, 1H), 6.30 (s, 1H), 6.22 – 6.16 (m, 1H), 6.18 – 6.11 (m, 1H), 5.78 – 5.66 (m, 1H), 5.46 (s, 1H), 5.29 (dd, *J* = 17.2, 2.0 Hz, 1H), 5.15 (dd, *J* = 10.0, 2.0 Hz, 1H), 5.13 (s, 1H), 5.11 – 5.07 (m, 1H), 4.12 – 4.02 (m, 2H), 4.03 – 3.97 (m, 1H), 2.57 – 2.48 (m, 1H), 2.37 – 2.27 (m, 1H), 1.12 (t, *J* = 7.2 Hz, 3H). <sup>13</sup>C NMR (100 MHz, Chloroform-*d*) δ 174.2, 140.5, 139.1, 133.7, 133.1, 131.9, 129.8, 129.2, 126.2, 122.2, 119.6, 118.8, 117.4, 116.4, 116.1, 109.4, 96.9, 65.0, 60.8, 54.9, 45.1, 42.4, 14.3. HRMS (ESI+) Calcd. For C<sub>25</sub>H<sub>25</sub>ClN<sub>2</sub>O<sub>2</sub> ([M+H]<sup>+</sup>): 421.1677, found: 421.1672. The product was analyzed by HPLC to determine the enantiomeric excess: 99% ee (Chiralpak IA, *i*-propanol/hexane = 5/95, flow rate 1.0 mL/min, λ = 254 nm); *t*<sub>r</sub> = 8.59 and 9.54 min.

**Ethyl (1S,3R,4R)-1-(4-chlorophenyl)-3-cinnamyl-4-vinyl-1,2,3,4-tetrahydropyrido[4,3-*b*]indolizine-3-carboxylate (1S,3R,4R)-3v**

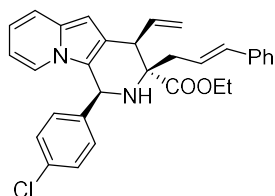

(1S,3R,4R)-3v

Yield (95%); >20:1 dr; yellow oil.  $[\alpha]_D^{20} = -7.6$  (*c* 0.25, CH<sub>2</sub>Cl<sub>2</sub>); <sup>1</sup>H NMR (400 MHz, Chloroform-*d*) δ 7.35 – 7.25 (m, 8H), 7.24 – 7.19 (m, 2H), 7.02 – 6.98 (m, 1H), 6.57 – 6.52 (m, 1H), 6.44 (d, *J* = 15.6 Hz, 1H), 6.31 (s, 1H), 6.27 – 6.17 (m, 1H), 6.19 – 6.16 (m, 1H), 6.13 – 6.03 (m, 1H), 5.46 (s, 1H), 5.33 (dd, *J* = 17.2, 2.0 Hz, 1H), 5.19 (dd, *J* = 10.0, 2.0 Hz, 1H), 4.14 (d, *J* = 8.8 Hz, 1H), 4.10 – 3.98 (m, 2H), 2.71 – 2.64 (m, 1H), 2.51 – 2.44 (m, 1H), 1.09 (t, *J* = 7.2 Hz, 3H). <sup>13</sup>C NMR (100 MHz, Chloroform-*d*) δ 174.3, 140.4, 139.2, 137.0, 134.3, 133.7, 133.1, 129.9, 129.2, 128.5, 127.4, 126.2, 126.2, 123.3, 122.2, 118.8, 117.4, 116.4, 116.2, 109.4, 96.9, 65.4, 60.8, 54.9, 45.2, 41.6, 14.3. HRMS (ESI+) Calcd. For C<sub>31</sub>H<sub>29</sub>ClN<sub>2</sub>O<sub>2</sub> ([M+H]<sup>+</sup>): 497.1990, found: 497.1982. The product was analyzed by HPLC to determine the enantiomeric excess: 99% ee (Chiralpak AD-H, *i*-propanol/hexane = 5/95, flow

rate 1.0 mL/min,  $\lambda = 254$  nm);  $t_r = 13.65$  and 16.59 min.

**Ethyl (1S,3R,4R)-1-(4-chlorophenyl)-3-(2-(methylthio)ethyl)-4-vinyl-1,2,3,4-tetrahydropyrido[4,3-b]indolizine-3-carboxylate (1S,3R,4R)-3w**

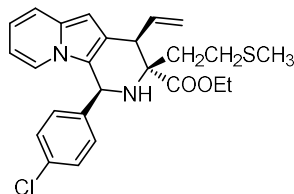

(1S,3R,4R)-3w

Yield (97%); >20:1 dr; yellow oil.  $[\alpha]_D^{20} = -104.0$  ( $c$  0.2,  $\text{CH}_2\text{Cl}_2$ );  $^1\text{H NMR}$  (400 MHz, Chloroform- $d$ )  $\delta$  7.33 – 7.26 (m, 3H), 7.24 – 7.20 (m, 2H), 7.01 – 6.97 (m, 1H), 6.60 – 6.52 (m, 1H), 6.30 (s, 1H), 6.21 – 6.17 (m, 1H), 6.18 – 6.09 (m, 1H), 5.40 (s, 1H), 5.31 (dd,  $J = 17.2, 2.0$  Hz, 1H), 5.16 (dd,  $J = 10.0, 2.0$  Hz, 1H), 4.12 – 4.04 (m, 2H), 4.06 – 4.01 (m, 1H), 2.59 – 2.40 (m, 2H), 2.06 (s, 3H), 2.07 – 2.02 (m, 1H), 1.88 – 1.79 (m, 1H), 1.12 (t,  $J = 7.2$  Hz, 3H).  $^{13}\text{C NMR}$  (100 MHz, Chloroform- $d$ )  $\delta$  174.0, 140.1, 138.7, 133.9, 133.1, 129.8, 129.2, 126.1, 122.2, 118.8, 117.0, 116.5, 116.3, 109.5, 96.9, 65.2, 61.0, 54.8, 44.6, 37.5, 28.0, 15.4, 14.3. HRMS (ESI+) Calcd. For  $\text{C}_{25}\text{H}_{27}\text{ClN}_2\text{O}_2\text{S}$  ( $[\text{M}+\text{H}]^+$ ): 455.1554, found: 455.1548. The product was analyzed by HPLC to determine the enantiomeric excess: 99% ee (Chiralpak AD-H, *i*-propanol/hexane = 5/95, flow rate 1.0 mL/min,  $\lambda = 254$  nm);  $t_r = 18.66$  and 20.08 min.

**Ethyl (1S,3R,4R)-1-(4-chlorophenyl)-3-(3-ethoxy-3-oxopropyl)-4-vinyl-1,2,3,4-tetrahydropyrido[4,3-b]indolizine-3-carboxylate (1S,3R,4R)-3x**

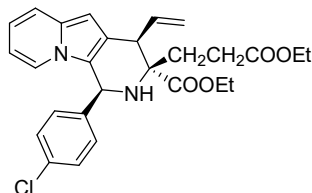

(1S,3R,4R)-3x

Yield (91%); >20:1 dr; yellow oil.  $[\alpha]_D^{20} = -115.5$  ( $c$  0.2,  $\text{CH}_2\text{Cl}_2$ );  $^1\text{H NMR}$  (400 MHz, Chloroform- $d$ )  $\delta$  7.32 – 7.26 (m, 3H), 7.24 – 7.19 (m, 2H), 7.02 – 6.97 (m, 1H), 6.59 – 6.52 (m, 1H), 6.31 (s, 1H), 6.22 – 6.17 (m, 1H), 6.18 – 6.08 (m, 1H), 5.40 (s, 1H), 5.30 (dd,  $J = 17.2, 2.0$  Hz, 1H), 5.16 (dd,  $J = 10.0, 2.0$  Hz, 1H), 4.12 – 4.07 (m, 2H), 4.08 – 4.03 (m, 2H), 4.04 – 4.00 (m, 1H), 2.43 – 2.34 (m, 2H), 2.10 – 2.04 (m, 1H), 1.97 – 1.89 (m, 1H), 1.22 (t,  $J = 7.2$  Hz, 3H), 1.11 (t,  $J = 7.2$  Hz, 3H).  $^{13}\text{C NMR}$

(100 MHz, Chloroform-*d*)  $\delta$  173.9, 172.8, 140.1, 138.6, 133.9, 133.1, 129.8, 129.2, 126.1, 122.2, 118.8, 117.1, 116.5, 116.4, 109.5, 97.0, 64.7, 61.0, 60.5, 54.8, 44.5, 32.3, 28.7, 14.2, 14.1. HRMS (ESI+) Calcd. For C<sub>27</sub>H<sub>29</sub>ClN<sub>2</sub>O<sub>4</sub> ([M+Na]<sup>+</sup>): 503.1708, found: 503.1707. The product was analyzed by HPLC to determine the enantiomeric excess: 99% ee (Chiralpak AD-H, *i*-propanol/hexane = 5/95, flow rate 1.0 mL/min,  $\lambda$  = 254 nm);  $t_r$  = 18.72 and 31.11 min.

**Ethyl (1*S*,3*R*,4*R*)-3-(4-(((benzyloxy)carbonyl)amino)butyl)-1-(4-chlorophenyl)-4-vinyl-1,2,3,4-tetrahydropyrido[4,3-*b*]indolizine-3-carboxylate (1*S*,3*R*,4*R*)-3y**

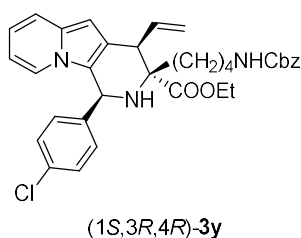

Yield (94%); >20:1 dr; yellow oil.  $[\alpha]_D^{20}$  = -66.0 (*c* 0.2, CH<sub>2</sub>Cl<sub>2</sub>); <sup>1</sup>H NMR (400 MHz, Chloroform-*d*)  $\delta$  7.35 – 7.28 (m, 8H), 7.26 – 7.20 (m, 2H), 6.99 (d, *J* = 7.2 Hz, 1H), 6.58 – 6.51 (m, 1H), 6.30 (s, 1H), 6.20 – 6.16 (m, 1H), 6.16 – 6.06 (m, 1H), 5.39 (s, 1H), 5.27 (dd, *J* = 17.2, 2.0 Hz, 1H), 5.12 (dd, *J* = 10.0, 2.0 Hz, 1H), 5.07 (s, 2H), 4.74 (br, 1H), 4.11 – 4.03 (m, 2H), 4.04 – 4.01 (m, 1H), 3.20 – 3.10 (m, 2H), 1.78 – 1.70 (m, 1H), 1.59 – 1.52 (m, 1H), 1.48 – 1.42 (m, 2H), 1.36 – 1.29 (m, 2H), 1.08 (t, *J* = 7.2 Hz, 3H). <sup>13</sup>C NMR (100 MHz, Chloroform-*d*)  $\delta$  174.4, 156.3, 140.3, 139.1, 136.5, 133.8, 133.1, 129.8, 129.2, 128.8, 128.5, 128.1, 126.3, 122.1, 118.8, 117.1, 116.4, 115.9, 109.4, 96.9, 66.6, 65.2, 60.8, 54.9, 44.5, 40.7, 37.4, 30.0, 20.5, 14.2. HRMS (ESI+) Calcd. For C<sub>34</sub>H<sub>36</sub>ClN<sub>3</sub>O<sub>4</sub> ([M+H]<sup>+</sup>): 586.2467, found: 586.2455. The product was analyzed by HPLC to determine the enantiomeric excess: 99% ee (Chiralpak ID, *i*-propanol/hexane = 20/80, flow rate 1.0 mL/min,  $\lambda$  = 242 nm);  $t_r$  = 21.32 and 33.43 min.

**Ethyl (1*S*,3*R*,4*R*)-3-((1*H*-indol-3-yl)methyl)-1-(4-chlorophenyl)-4-vinyl-1,2,3,4-tetrahydropyrido[4,3-*b*]indolizine-3-carboxylate (1*S*,3*R*,4*R*)-3z**



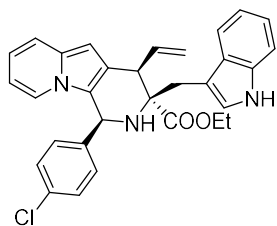

(1S,3R,4R)-3z

Yield (55%); >20:1 dr; yellow solid; m.p. = 93 °C.  $[\alpha]_D^{20} = -2.0$  (*c* 0.3, CH<sub>2</sub>Cl<sub>2</sub>); <sup>1</sup>H NMR (400 MHz, Chloroform-*d*) δ 8.13 (s, 1H), 7.50 – 7.46 (m, 1H), 7.30 – 7.25 (m, 4H), 7.18 – 7.10 (m, 3H), 7.05 – 6.96 (m, 3H), 6.56– 6.49 (m, 1H), 6.42 – 6.32 (m, 1H), 6.32 (s, 1H), 6.19 – 6.12 (m, 1H), 5.40 (dd, *J* = 17.2, 2.0 Hz, 1H), 5.37 (s, 1H), 5.24 (dd, *J* = 10.0, 2.0 Hz, 1H), 4.26 (d, *J* = 10.0 Hz, 1H), 3.74 (q, *J* = 7.2 Hz, 2H), 3.29 – 3.07 (m, 2H), 0.83 (t, *J* = 7.2 Hz, 3H). <sup>13</sup>C NMR (100 MHz, Chloroform-*d*) δ 174.6, 140.9, 139.7, 136.0, 133.5, 133.1, 129.9, 129.0, 128.0, 126.3, 123.1, 122.2, 122.0, 119.4, 118.84, 118.75, 117.6, 116.3, 116.1, 111.1, 110.0, 109.3, 96.8, 65.8, 60.7, 54.9, 46.0, 33.7, 13.8. HRMS (ESI+) Calcd. For C<sub>31</sub>H<sub>28</sub>ClN<sub>3</sub>O<sub>2</sub> ([M+H]<sup>+</sup>): 510.1943, found: 510.1939. The product was analyzed by HPLC to determine the enantiomeric excess: 99% ee (Chiralpak ID, *i*-propanol/hexane = 10/90, flow rate 1.0 mL/min, λ = 254 nm); t<sub>r</sub> = 7.85 and 14.34 min.

**Ethyl (1S,3R,4R)-1-(4-methoxyphenyl)-4-vinyl-1,2,3,4-tetrahydropyrido[4,3-b]indolizine-3-carboxylate (1S,3R,4R)-3A**

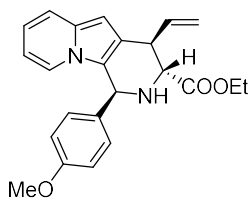

(1S, 3R, 4R)-3A

Yield (69%); 6:1 dr; yellow oil.  $[\alpha]_D^{20} = -13.2$  (*c* 0.5, CH<sub>2</sub>Cl<sub>2</sub>); <sup>1</sup>H NMR (400 MHz, Chloroform-*d*) δ 7.35 – 7.31 (m, 1H), 7.18 – 7.14 (m, 2H), 7.02 – 6.98 (m, 1H), 6.90 – 6.85 (m, 2H), 6.61 – 6.55 (m, 1H), 6.33 (s, 1H), 6.24 – 6.19 (m, 1H), 5.85 – 5.73 (m, 1H), 5.33 – 5.27 (m, 1H), 5.27 – 5.21 (m, 2H), 4.18 (q, *J* = 7.2 Hz, 2H), 3.85 – 3.81 (m, 1H), 3.80 (s, 3H), 3.54 (d, *J* = 10.0 Hz, 1H), 1.26 (t, *J* = 7.2 Hz, 3H). <sup>13</sup>C NMR (100 MHz, Chloroform-*d*) δ 172.1, 159.6, 137.3, 132.5, 131.7, 129.3, 126.3, 122.7, 118.7, 118.2, 117.7, 116.3, 114.6, 109.6, 96.9, 62.2, 60.8, 56.6, 55.3, 45.8, 14.2. HRMS (ESI+) Calcd. For C<sub>23</sub>H<sub>24</sub>N<sub>2</sub>O<sub>3</sub> ([M+H]<sup>+</sup>): 377.1860, found: 377.1857. The product was analyzed by HPLC to determine the enantiomeric excess: 99% ee (Chiralpak AD-H, *i*-propanol/hexane = 20/80, flow rate

1.0 mL/min,  $\lambda = 254$  nm);  $t_r = 7.30$  and  $9.25$  min.

**Ethyl (1*S*,3*R*,4*R*)-1-(4-chlorophenyl)-3,6-dimethyl-4-vinyl-1,2,3,4-tetrahydropyrido[4,3-*b*]indolizine-3-carboxylate (1*S*,3*R*,4*R*)-3B**

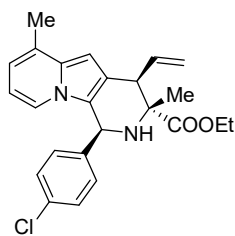

(1*S*,3*R*,4*R*)-3B

Yield (83%); >20:1 dr; yellow oil.  $[\alpha]_D^{20} = -120.0$  ( $c$  0.2, CH<sub>2</sub>Cl<sub>2</sub>); <sup>1</sup>H NMR (400 MHz, Chloroform-*d*)  $\delta$  7.31 – 7.26 (m, 2H), 7.24 – 7.19 (m, 2H), 6.92 – 6.88 (m, 1H), 6.39 – 6.35 (m, 1H), 6.30 (s, 1H), 6.20 – 6.13 (m, 1H), 6.14 – 6.10 (m, 1H), 5.45 (s, 1H), 5.28 (dd,  $J = 17.2, 2.0$  Hz, 1H), 5.16 (dd,  $J = 10.0, 2.0$  Hz, 1H), 4.14 – 4.04 (m, 2H), 4.06 – 3.98 (m, 1H), 2.35 (s, 3H), 1.34 (s, 3H), 1.13 (t,  $J = 7.2$  Hz, 3H). <sup>13</sup>C NMR (100 MHz, Chloroform-*d*)  $\delta$  175.7, 140.5, 139.2, 134.0, 133.7, 129.8, 129.2, 127.8, 125.9, 120.3, 117.5, 116.2, 115.8, 109.5, 95.6, 62.1, 60.9, 54.9, 45.5, 25.0, 18.1, 14.1. HRMS (ESI+) Calcd. For C<sub>24</sub>H<sub>25</sub>ClN<sub>2</sub>O<sub>2</sub> ([M+H]<sup>+</sup>): 409.1677, found: 409.1670. The product was analyzed by HPLC to determine the enantiomeric excess: 99% ee (Chiralpak AD-H, *i*-propanol/hexane = 10/90, flow rate 1.0 mL/min,  $\lambda = 254$  nm);  $t_r = 4.91$  and  $18.32$  min.

**Ethyl (1*S*,3*R*,4*R*)-7-chloro-1-(4-chlorophenyl)-3-methyl-4-vinyl-1,2,3,4-tetrahydropyrido[4,3-*b*]indolizine-3-carboxylate (1*S*,3*R*,4*R*)-3C**

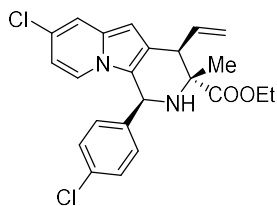

(1*S*,3*R*,4*R*)-3C

Yield (82%); >20:1 dr; yellow oil.  $[\alpha]_D^{20} = -206.0$  ( $c$  0.2, CH<sub>2</sub>Cl<sub>2</sub>); <sup>1</sup>H NMR (400 MHz, Chloroform-*d*)  $\delta$  7.33 – 7.29 (m, 2H), 7.25 – 7.14 (m, 3H), 6.94 – 6.90 (m, 1H), 6.27 (s, 1H), 6.17 – 6.13 (m, 1H), 6.14 – 6.06 (m, 1H), 5.43 (s, 1H), 5.25 (dd,  $J = 17.2, 2.0$  Hz, 1H), 5.16 (dd,  $J = 10.0, 2.0$  Hz, 1H), 4.14 – 4.06 (m, 1H), 4.07 – 3.99 (m, 2H), 1.33 (s, 3H), 1.12 (t,  $J = 7.2$  Hz, 3H). <sup>13</sup>C NMR (100 MHz, Chloroform-*d*)  $\delta$  175.6, 139.9, 138.7, 134.0, 132.7, 129.7, 129.3, 127.5, 122.78, 122.76, 117.7, 117.2,

116.5, 110.8, 97.4, 62.0, 60.9, 54.7, 45.3, 24.8, 14.1. HRMS (ESI+) Calcd. For  $C_{23}H_{22}Cl_2N_2O_2$  ( $[M+H]^+$ ): 429.1131, found: 429.1126. The product was analyzed by HPLC to determine the enantiomeric excess: 99% ee (Chiralpak AD-H, *i*-propanol/hexane = 20/80, flow rate 1.0 mL/min,  $\lambda$  = 254 nm);  $t_r$  = 5.46 and 12.81 min.

**Ethyl (1*S*,3*R*,4*R*)-8-bromo-1-(4-chlorophenyl)-3-methyl-4-vinyl-1,2,3,4-tetrahydropyrido[4,3-*b*]indolizine-3-carboxylate (1*S*,3*R*,4*R*)-3D**

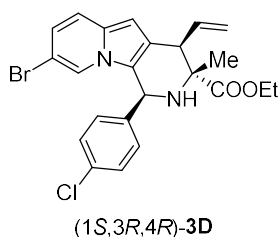

Yield (75%); >20:1 dr; yellow oil.  $[\alpha]_D^{20} = -266.5$  (*c* 0.2,  $CH_2Cl_2$ );  $^1H$  NMR (400 MHz, Chloroform-*d*)  $\delta$  7.34 – 7.30 (m, 2H), 7.24 – 7.14 (m, 4H), 6.64 – 6.58 (m, 1H), 6.35 (s, 1H), 6.17 – 6.06 (m, 1H), 5.42 (s, 1H), 5.25 (dd,  $J = 17.2, 2.0$  Hz, 1H), 5.17 (dd,  $J = 10.0, 2.0$  Hz, 1H), 4.10 – 4.05 (m, 1H), 4.06 – 4.00 (m, 2H), 1.33 (s, 3H), 1.12 (t,  $J = 7.2$  Hz, 3H).  $^{13}C$  NMR (100 MHz, Chloroform-*d*)  $\delta$  175.5, 139.7, 138.8, 134.1, 131.4, 129.7, 129.3, 127.1, 122.0, 119.8, 119.4, 118.0, 116.6, 104.5, 98.6, 62.0, 60.9, 54.8, 45.4, 24.9, 14.2. HRMS (ESI+) Calcd. For  $C_{23}H_{22}BrClN_2O_2$  ( $[M+H]^+$ ): 473.0626, found: 473.0613. The product was analyzed by HPLC to determine the enantiomeric excess: 99% ee (Chiralpak IE, *i*-propanol/hexane = 5/95, flow rate 1.0 mL/min,  $\lambda$  = 250 nm);  $t_r$  = 4.85 and 5.22 min.

**Ethyl (1*S*,3*R*,4*R*)-1-(4-chlorophenyl)-3-methyl-8-phenyl-4-vinyl-1,2,3,4-tetrahydropyrido[4,3-*b*]indolizine-3-carboxylate (1*S*,3*R*,4*R*)-3E**

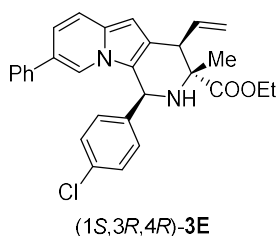

Yield (83%); >20:1 dr; yellow solid; m.p. = 74 °C.  $[\alpha]_D^{20} = -389.0$  (*c* 0.5,  $CH_2Cl_2$ );  $^1H$  NMR (400 MHz, Chloroform-*d*)  $\delta$  7.36 – 7.30 (m, 5H), 7.27 – 7.16 (m, 6H), 6.88 – 6.81 (m, 1H), 6.34 (s, 1H), 6.21 – 6.10 (m, 1H), 5.50 (s, 1H), 5.27 (dd,  $J = 17.2, 2.0$  Hz, 1H), 5.17 (dd,  $J = 10.0, 2.0$  Hz, 1H), 4.13 – 4.05 (m, 2H), 4.06 – 3.99 (m, 1H), 1.35 (s, 3H), 1.13 (t,  $J = 7.2$  Hz, 3H).  $^{13}C$  NMR (100 MHz,

Chloroform-*d*)  $\delta$  175.7, 140.3, 139.0, 138.4, 133.9, 132.2, 129.8, 129.2, 128.8, 127.0, 126.9, 126.3, 123.4, 119.7, 118.7, 117.8, 117.1, 116.4, 97.2, 62.1, 60.9, 54.9, 45.4, 25.0, 14.1. HRMS (ESI+) Calcd. For  $C_{29}H_{27}ClN_2O_2$  ( $[M+H]^+$ ): 471.1834, found: 471.1825. The product was analyzed by HPLC to determine the enantiomeric excess: 99% ee (Chiralpak AD-H, *i*-propanol/hexane = 5/95, flow rate 1.0 mL/min,  $\lambda$  = 254 nm);  $t_r$  = 11.83 and 21.13 min.

#### 4. Experimental Procedures and Characterization for Synthetic Applications

##### Ethyl (1*S*,3*R*,4*R*)-1-(4-chlorophenyl)-5-formyl-3-methyl-4-vinyl-1,2,3,4-tetrahydropyrido[4,3-*b*]indolizine-3-carboxylate<sup>4</sup> (1*S*,3*R*,4*R*)-4

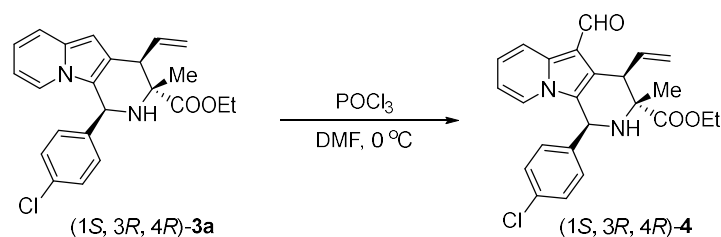

(1*S*,3*R*,4*R*)-3a (78.8 mg, 0.2 mmol) was dissolved in DMF (0.5 mL). A solution of distilled POCl<sub>3</sub> (36.8 mg, 0.24 mmol) in DMF (0.1 mL) was added to the solution at 0 °C. After stirring for 20 minutes in 0 °C, the reaction mixture was carefully quenched with cold water and extracted with EA. The organic phase was reextracted with water, washed with brine and dried over Na<sub>2</sub>SO<sub>4</sub>. The solvent was removed under reduced pressure to afford the product (1*S*,3*R*,4*R*)-4.

Yield (72%); >20:1 dr; yellow oil.  $[\alpha]_D^{20}$  = -9.0 (*c* 0.3, CH<sub>2</sub>Cl<sub>2</sub>); <sup>1</sup>H NMR (400 MHz, Chloroform-*d*)  $\delta$  10.13 (s, 1H), 8.24 (d, *J* = 8.8 Hz, 1H), 7.35 – 7.31 (m, 2H), 7.28 – 7.21 (m, 3H), 7.15 – 7.08 (m, 1H), 6.62 – 6.56 (m, 1H), 6.19 – 6.09 (m, 1H), 5.48 (s, 1H), 5.38 (dd, *J* = 17.2, 2.0 Hz, 1H), 5.27 (dd, *J* = 10.0, 2.0 Hz, 1H), 4.56 – 4.50 (m, 1H), 4.06 (q, *J* = 7.2 Hz, 2H), 1.38 (s, 3H), 1.10 (t, *J* = 7.2 Hz, 3H). <sup>13</sup>C NMR (100 MHz, Chloroform-*d*)  $\delta$  182.7, 175.3, 139.1, 137.5, 137.0, 134.3, 129.6, 129.5, 129.1, 124.4, 123.6, 120.0, 119.2, 118.1, 113.5, 110.2, 61.9, 61.1, 54.4, 43.2, 24.6, 14.1. For  $C_{24}H_{23}ClN_2O_3$  ( $[M+H]^+$ ): 423.1469, found: 423.1462. The product was analyzed by HPLC to determine the enantiomeric excess: 99% ee (Chiralpak AD-H, *i*-propanol/hexane = 20/80, flow rate 1.0 mL/min,  $\lambda$  = 254 nm);  $t_r$  = 8.70 and 11.94 min.

##### Ethyl (1*S*,3*R*,4*R*)-1-(4-chlorophenyl)-4-cyclopropyl-3-methyl-1,2,3,4-tetrahydropyrido[4,3-

### *b*]indolizine-3-carboxylate<sup>5</sup> (1*S*,3*R*,4*R*)-5

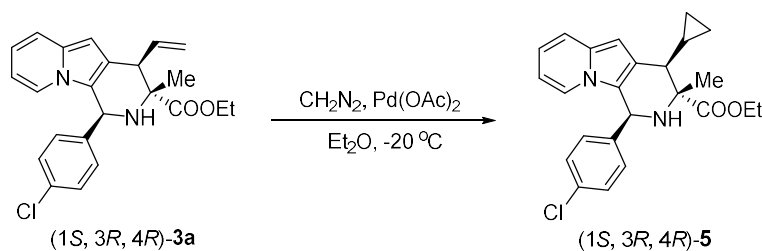

Fresh prepared diazomethane solution (0.5 M in Et<sub>2</sub>O, 2 mL) and (1*S*,3*R*,4*R*)-**3a** (78.8 mg, 0.2 mmol) were added into a Schlenk tube. Under a positive nitrogen pressure, the reaction was cooled to -20 °C, and Pd(OAc)<sub>2</sub> (1.5 mg, 1 mol %) was added in one portion with gas evolution. After stirring for 1 hour in -20 °C, the reaction was moved to room temperature and stirred overnight. While the reaction was partly completed, the solvent was removed under reduced pressure and the residue was purified by a flash column chromatography (PE/EA = 8/1) to afford the product (1*S*,3*R*,4*R*)-**5**.

Yield (43%); >20:1 dr; yellow oil.  $[\alpha]_D^{20} = -74.0$  (*c* 0.2, CH<sub>2</sub>Cl<sub>2</sub>); <sup>1</sup>H NMR (400 MHz, Chloroform-*d*) δ 7.31 – 7.28 (m, 3H), 7.25 – 7.23 (m, 2H), 7.01 (d, *J* = 7.2 Hz, 1H), 6.58 – 6.53 (m, 1H), 6.33 (s, 1H), 6.20 – 6.16 (m, 1H), 5.45 (s, 1H), 4.06 – 3.96 (m, 2H), 2.64 (d, *J* = 10.0 Hz, 1H), 1.53 (s, 3H), 1.24 – 1.18 (m, 1H), 1.08 (t, *J* = 7.2 Hz, 3H), 0.89 – 0.84 (m, 1H), 0.73 – 0.68 (m, 1H), 0.56 – 0.52 (m, 1H), 0.51 – 0.50 (m, 1H). <sup>13</sup>C NMR (100 MHz, Chloroform-*d*) δ 176.2, 140.7, 133.7, 132.8, 129.8, 129.2, 128.3, 122.1, 118.8, 116.9, 116.2, 109.3, 97.0, 63.5, 60.7, 55.0, 45.1, 24.8, 14.6, 14.1, 7.6, 2.2. HRMS (ESI+) Calcd. For C<sub>24</sub>H<sub>25</sub>ClN<sub>2</sub>O<sub>2</sub> ([M+H]<sup>+</sup>): 409.1677, found: 409.1678. The product was analyzed by HPLC to determine the enantiomeric excess: 99% ee (Chiralpak AD-H, *i*-propanol/hexane = 10/90, flow rate 1.0 mL/min, λ = 254 nm); t<sub>r</sub> = 7.12 and 12.05 min.

### Ethyl (1*S*,3*R*,4*R*)-1-(4-chlorophenyl)-4-ethyl-3-methyl-1,2,3,4-tetrahydropyrido[4,3-*b*]indolizine-3-carboxylate<sup>6</sup> (1*S*,3*R*,4*R*)-6

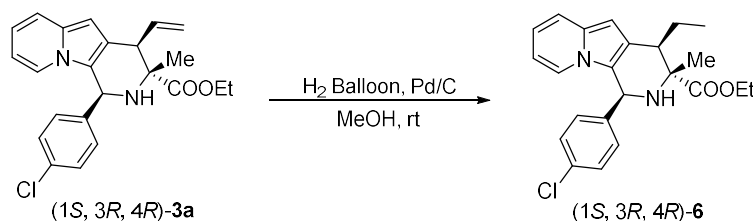

Pd/C (21.0 mg, palladium on activated carbon, 10% Pd basis, 1 mol %) was added to a solution of (1*S*,3*R*,4*R*)-**3a** (78.8 mg, 0.2 mmol) in anhydrous MeOH (4 mL). The reaction mixture was stirred under H<sub>2</sub> atmosphere (1 atm) at room temperature for 6 hours. After the reaction was completed

(monitored by TLC), the crude reaction mixture was filtrated with celite and washed with MeOH. The solvent was removed under reduced pressure, then the residue was purified by a flash column chromatography (PE/EA = 6/1) to afford the product (1*S*,3*R*,4*R*)-**6**.

Yield (93%); >20:1 dr; yellow oil.  $[\alpha]_D^{20} = -52.1$  (*c* 0.2, CH<sub>2</sub>Cl<sub>2</sub>); <sup>1</sup>H NMR (400 MHz, Chloroform-*d*) δ 7.31 - 7.25 (m, 3H), 7.23 - 7.18 (m, 2H), 7.04 - 7.00 (m, 1H), 6.58 – 6.52 (m, 1H), 6.33 (s, 1H), 6.22 – 6.16 (m, 1H), 5.45 (s, 1H), 4.00 (q, *J* = 7.2 Hz, 2H), 3.27 (dd, *J* = 10.8, 4.4 Hz, 1H), 1.96 – 1.89 (m, 1H), 1.65 – 1.53 (m, 1H), 1.38 (s, 3H), 1.11 (t, *J* = 7.2 Hz, 3H), 1.05 (t, *J* = 7.2 Hz, 3H). <sup>13</sup>C NMR (100 MHz, Chloroform-*d*) δ 176.4, 140.8, 133.6, 132.3, 129.6, 129.2, 127.9, 121.9, 118.6, 117.0, 116.0, 109.2, 98.7, 63.0, 60.6, 55.0, 41.3, 24.4, 24.1, 14.1, 12.4. HRMS (ESI+) Calcd. For C<sub>23</sub>H<sub>25</sub>ClN<sub>2</sub>O<sub>2</sub> ([M+H]<sup>+</sup>): 397.1677, found: 397.1672. The product was analyzed by HPLC to determine the enantiomeric excess: 99% ee (Chiralpak AD-H, *i*-propanol/hexane = 10/90, flow rate 1.0 mL/min, λ = 254 nm); t<sub>r</sub> = 7.09 and 11.41 min.

**Ethyl (1*S*,3*R*,4*R*)-1-(4-chlorophenyl)-3-methyl-4-(2-(4,4,5,5-tetramethyl-1,3,2-dioxaborolan-2-yl)ethyl)-1,2,3,4-tetrahydropyrido[4,3-*b*]indolizine-3-carboxylate<sup>7</sup> (1*S*,3*R*,4*R*)-**7****

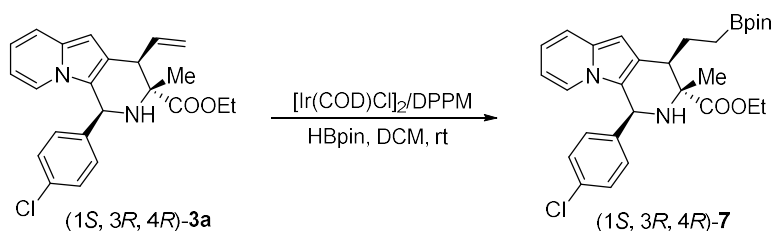

To a solution of [Ir(COD)Cl]<sub>2</sub> (6.7 mg, 5 mol %) and bis(diphenylphosphino)methane (DPPM, 7.7 mg, 10 mol %) in anhydrous DCM (2 mL) was added (1*S*,3*R*,4*R*)-**3a** (76.2 g, 0.2 mmol) in one portion under a positive argon pressure. Then 4,4,5,5-tetramethyl-1,3,2-dioxaborolane (HBpin, 58 μL, 0.4 mmol) was added at room temperature and the resulting solution was stirred overnight. The reaction mixture was quenched with MeOH (1 mL) and concentrated under reduced pressure. The residue was purified by silica-gel flash column chromatography (PE/EA = 8/1, with 1% MeOH) to afford the product (1*S*,3*R*,4*R*)-**7**.

Yield (83%); >20:1 dr; yellow oil.  $[\alpha]_D^{20} = -38.0$  (*c* 0.2, CH<sub>2</sub>Cl<sub>2</sub>); <sup>1</sup>H NMR (400 MHz, Chloroform-*d*) δ 7.29 – 7.25 (m, 5H), 7.02 (d, *J* = 7.2 Hz, 1H), 6.57 – 6.50 (m, 1H), 6.35 (s, 1H), 6.21 – 6.15 (m, 1H), 5.45 (s, 1H), 4.04 - 3.92 (m, 2H), 3.30 – 3.24 (m, 1H), 2.05 – 1.99 (m, 1H), 1.70 – 1.63 (m, 1H), 1.40 (s, 3H), 1.22 (s, 6H), 1.15 (s, 6H), 1.12 – 1.07 (m, 1H), 1.05 (t, *J* = 7.2 Hz, 3H), 1.02 – 0.95 (m, 1H).

$^{13}\text{C}$  NMR (100 MHz, Chloroform-*d*)  $\delta$  176.3, 140.7, 133.6, 132.2, 129.9, 129.1, 127.8, 121.9, 118.6, 116.9, 116.0, 109.2, 98.9, 82.9, 63.0, 60.6, 55.1, 41.7, 25.2, 24.9, 24.8, 24.4, 14.1. HRMS (ESI+) Calcd. For  $\text{C}_{29}\text{H}_{36}\text{BClN}_2\text{O}_4$  ( $[\text{M}+\text{H}]^+$ ): 523.2534, found: 523.2526. The product was analyzed by HPLC to determine the enantiomeric excess: 99% ee (Chiralpak AD-H, *i*-propanol/hexane = 5/95, flow rate 1.0 mL/min,  $\lambda$  = 254 nm);  $t_r$  = 10.0 and 20.75 min.

## 5. Hammett Plot Studies

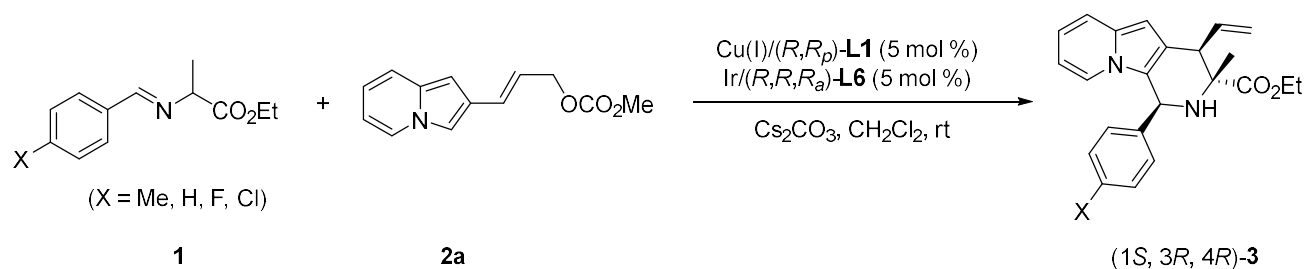

To probe the electronic effects for this cascade allylation/Friedel-Crafts type reaction, the rate of synergistic Cu/Ir-catalyzed asymmetric cascade annulation of 2-indolizinyll allyl carbonate **2a** with *p*-X-C<sub>6</sub>H<sub>4</sub>CHO derived  $\alpha$ -methyl substituted imino esters **1** containing electron-rich and electron-deficient substituted groups on the phenyl ring (X = CH<sub>3</sub>, H, F, Cl) was measured by the <sup>1</sup>H NMR spectroscopic method. The hammett-plot study on imino esters **1** was performed using the initial rates and the corresponding substituent constants. All reactions were performed using the general procedure on 0.2 mmol scale, the product formation was determined by <sup>1</sup>H NMR every three minutes. The Hammett plot resulted in the linear fit with a positive slope, which indicated that the electron-deficient substituents should accelerate this cascade asymmetric transformation.

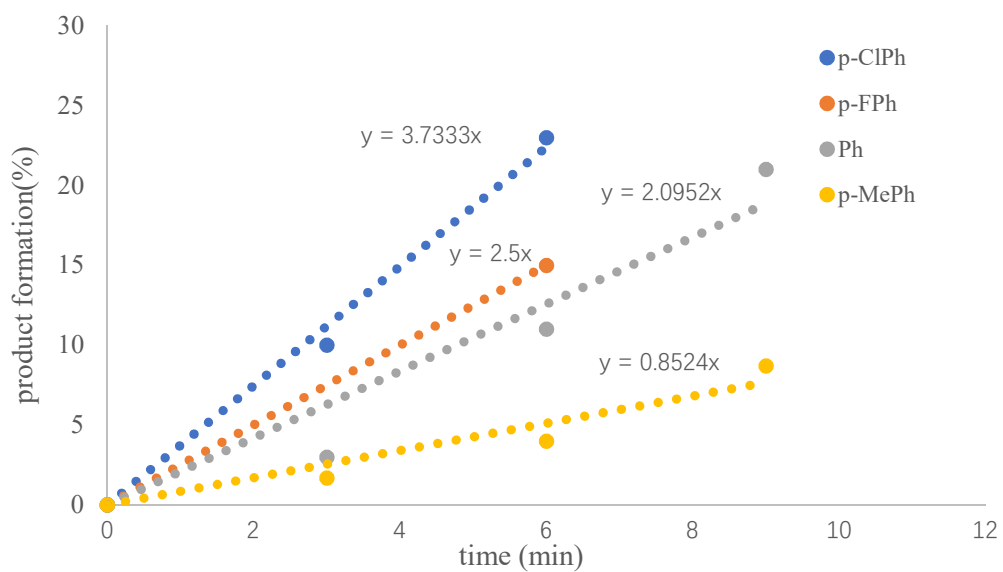

| X               | Me     | H      | F      | Cl     |
|-----------------|--------|--------|--------|--------|
| K               | 0.8524 | 2.0952 | 2.5000 | 3.7333 |
| $K_X/K_H$       | 0.41   | 1.00   | 1.19   | 1.78   |
| $\log(K_X/K_H)$ | -0.39  | 0.00   | 0.08   | 0.25   |
| $\sigma_p$      | -0.17  | 0.00   | 0.06   | 0.23   |

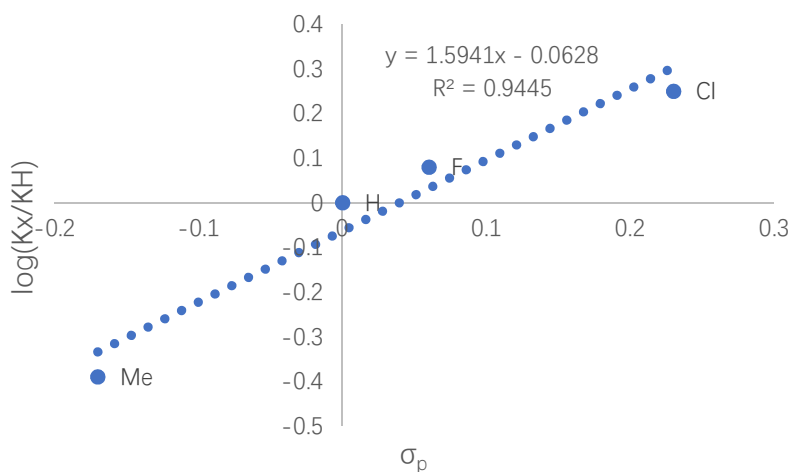

**Figure S1.** Hammett plot from synergistic Cu/Ir-catalyzed asymmetric [3 + 3] annulation of 2-indolizinyll formaldehyde derived allyl carbonate **2a** with *p*-X-C<sub>6</sub>H<sub>4</sub>CHO derived  $\alpha$ -methyl substituted imino esters (X = Me, H, F, Cl).



## 6. Absolute configuration determination of (1*S*,3*R*,4*R*)-**3k**

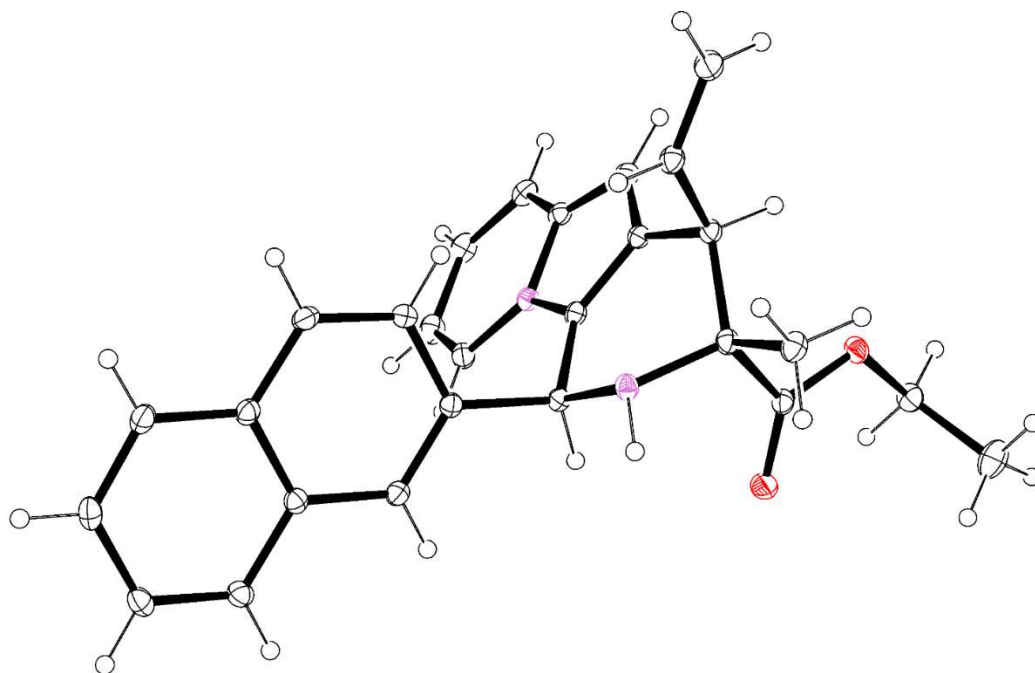

**Figure S2.** ORTEP representation of (1*S*,3*R*,4*R*)-**3k** (CCDC 2221435) at 30% probability for the drawing of thermal ellipsoids.

To a 30 mL oven-dried glass sample bottle was added 80 mg pure **3k** with 0.4 mL DCM to get clear solution, then 4 mL PE was slowly added. The mixture solution was sealed with filter paper to slowly grow crystals at room temperature. Crystal data for (1*S*,3*R*,4*R*)-**3k**:  $C_{27}H_{26}N_2O_2$ ,  $M_r = 410.50$ ,  $T = 100$  K, orthorhombic, space group P 21 21 21,  $a = 6.94728(4)$ ,  $b = 13.79687(7)$ ,  $c = 22.55057(13)$  Å,  $V = 2161.49(2)$  Å<sup>3</sup>,  $Z = 4$ , 4251 unique reflections, final  $R_1 = 0.0263$  and  $wR_2 = 0.0673$  for 4335 observed [ $I > 2\sigma(I)$ ] reflections, Flack  $\chi = 0.08(6)$ . CCDC 2221435 contains the supplementary crystallographic data for this paper. These data can be obtained free of charge via [www.ccdc.cam.ac.uk/conts/retrieving.html](http://www.ccdc.cam.ac.uk/conts/retrieving.html) (or from the Cambridge Crystallographic Data Centre, 12, Union Road, Cambridge CB21EZ, UK; fax: (+44) 1223-336-033; or [deposit@ccdc.cam.ac.uk](mailto:deposit@ccdc.cam.ac.uk)).

## 7. References

- (1) Wang, C.-J.; Liang, G.; Xue, Z.-Y.; Gao, F. Highly Enantioselective 1,3-Dipolar Cycloaddition of Azomethine Ylides Catalyzed by Copper(I)/TF-Biphosphine Complexes. *J. Am. Chem. Soc.* **2008**, *130*, 17250.
- (2) Richards, C. J.; Mulvaney, A. W. Synthesis of phosphinoferrocenyloxazolines. New ligands for asymmetric catalysis. *Tetrahedron: Asymmetry* **1996**, *7*, 1419.
- (3) Craig, R. S.; Daniel, J. M.; T. V. RajanBabu, (*R*)-2,2'-Binaphthoyl-(*S,S*)-Di(1-Phenylethyl) Aminophosphine. Scalable Protocols for the Syntheses of Phosphoramidite (Feringa) Ligands. *Org. Synth.* **2008**, 85.
- (4) Burnett, D. A.; Vacca, J. P. PCT Int. Appl., 2018119395, 28 Jun 2018.
- (5) Stanley, L. M.; Hartwig, J. F. *Angew. Chem., Int. Ed.* **2009**, *48*, 7841.

## 8. NMR and HPLC Spectra

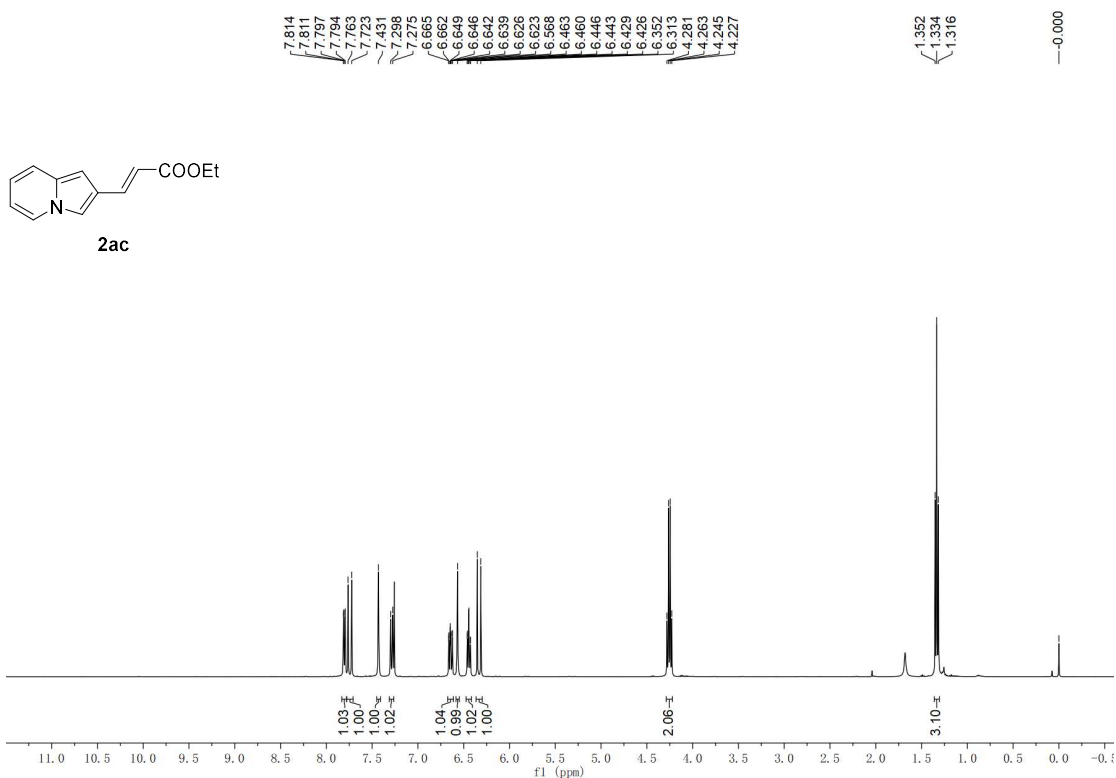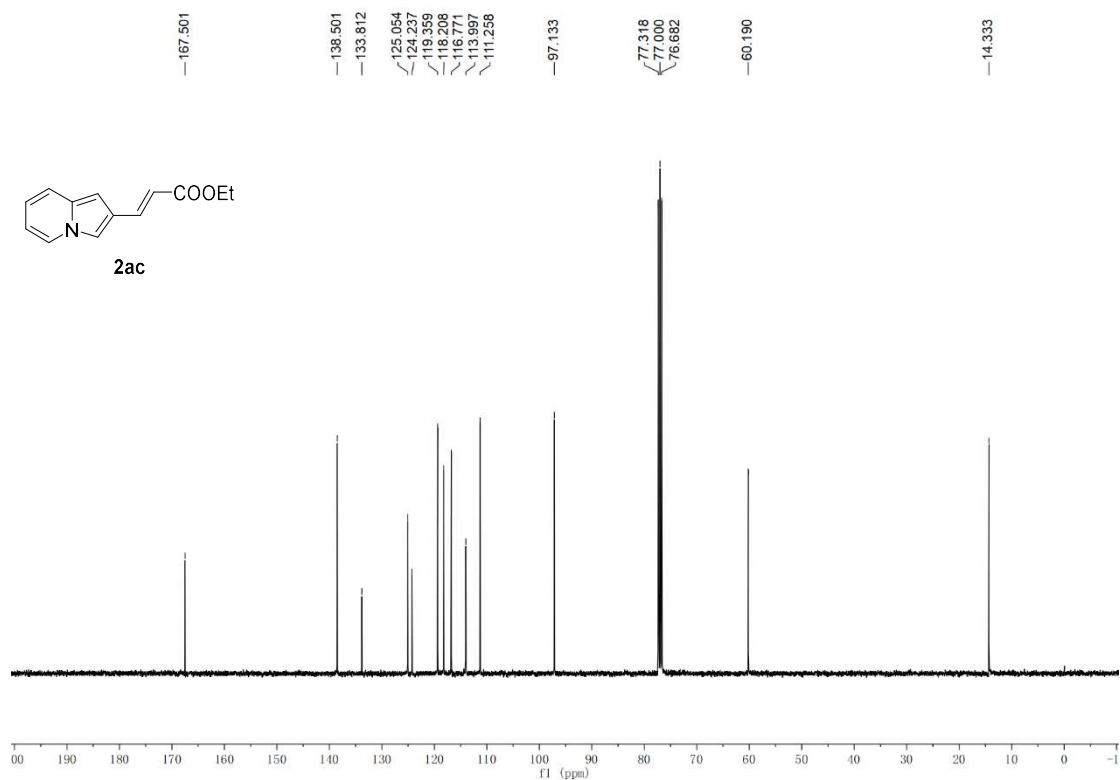

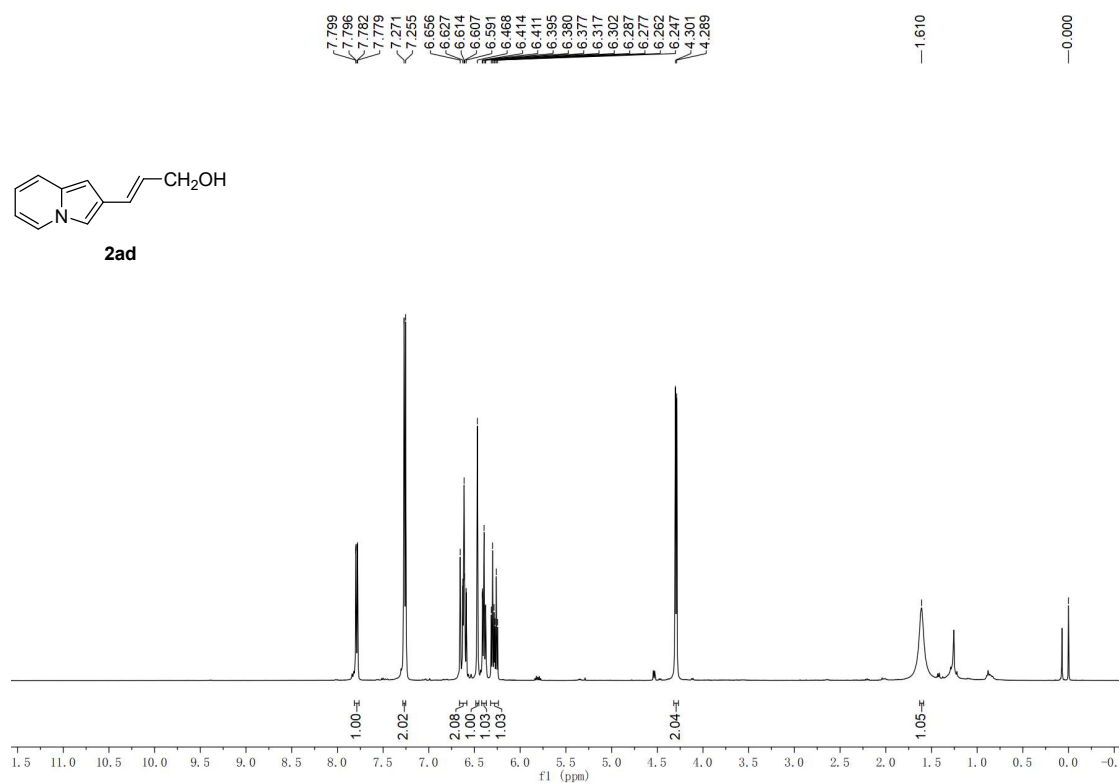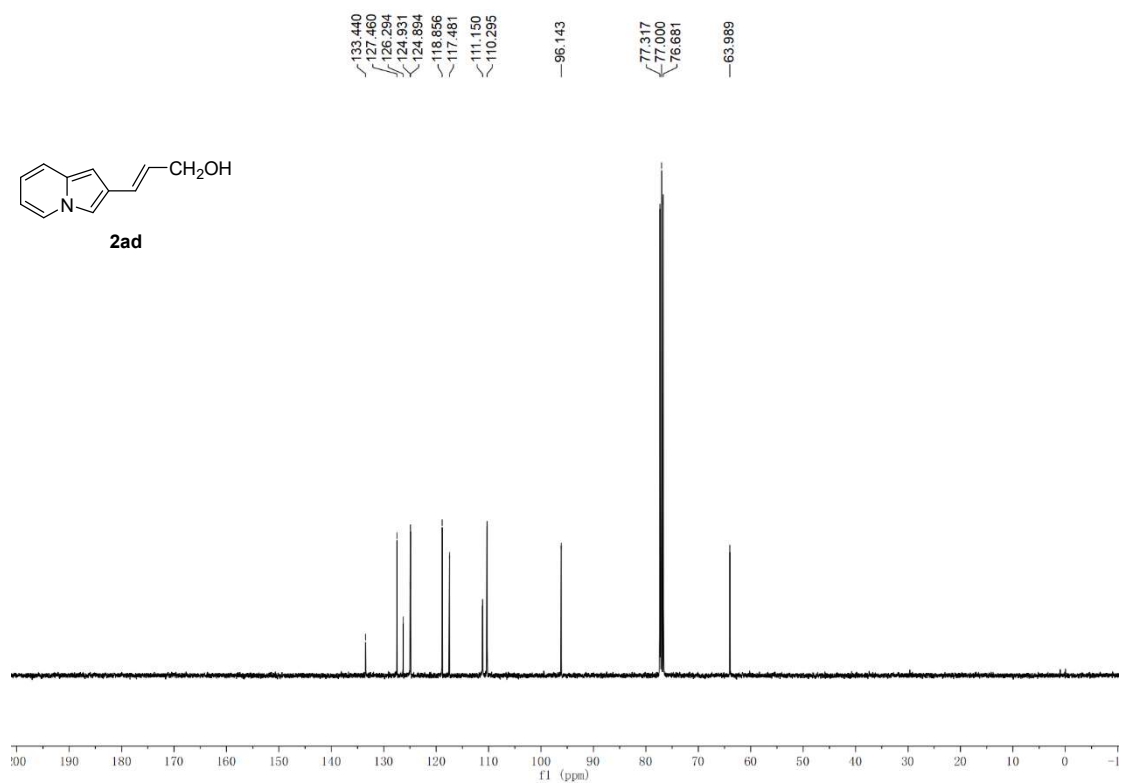

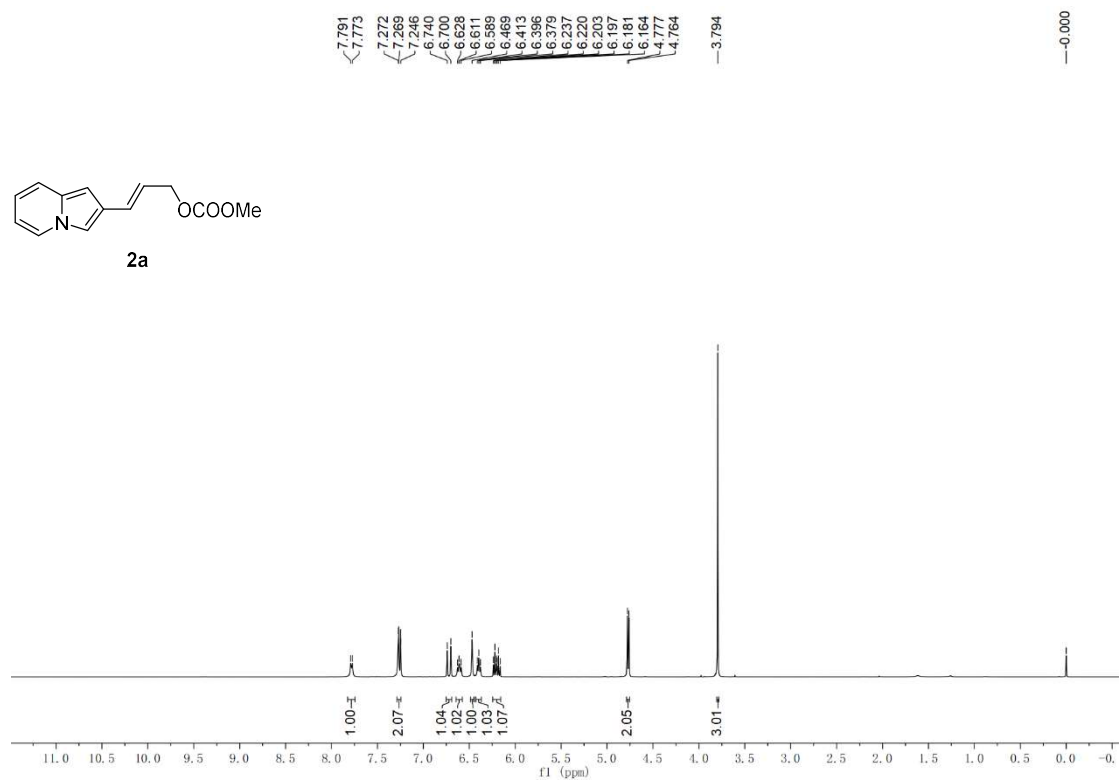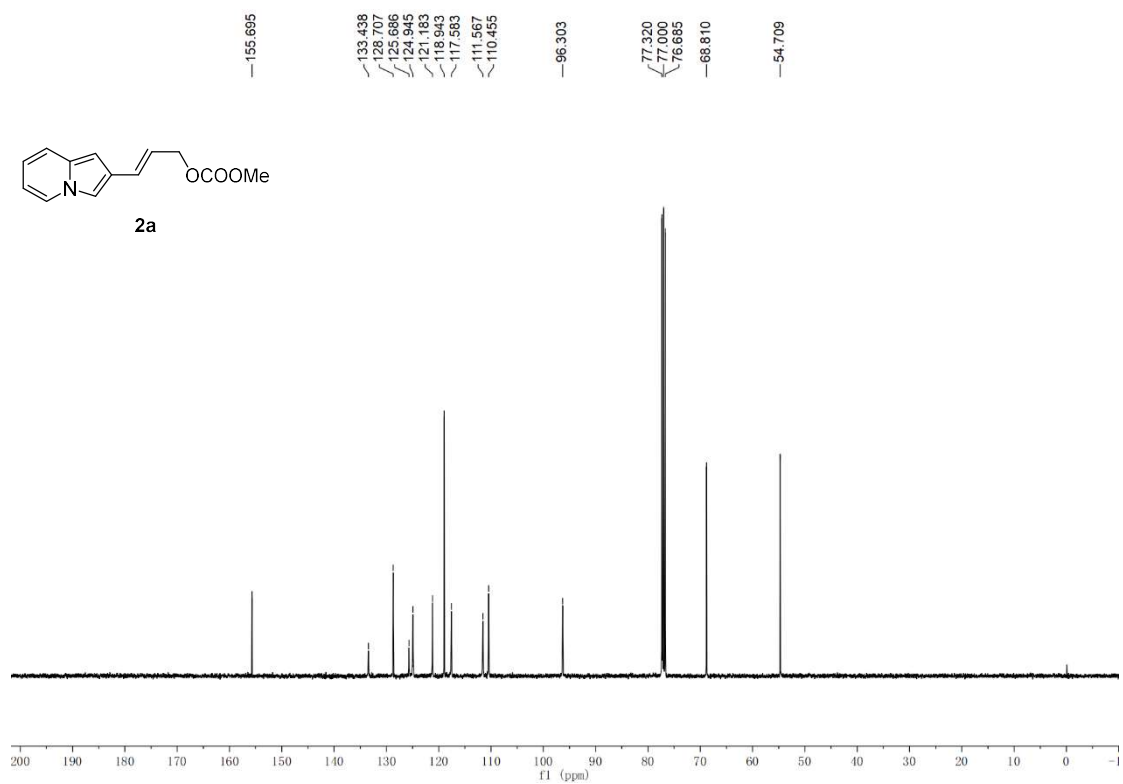

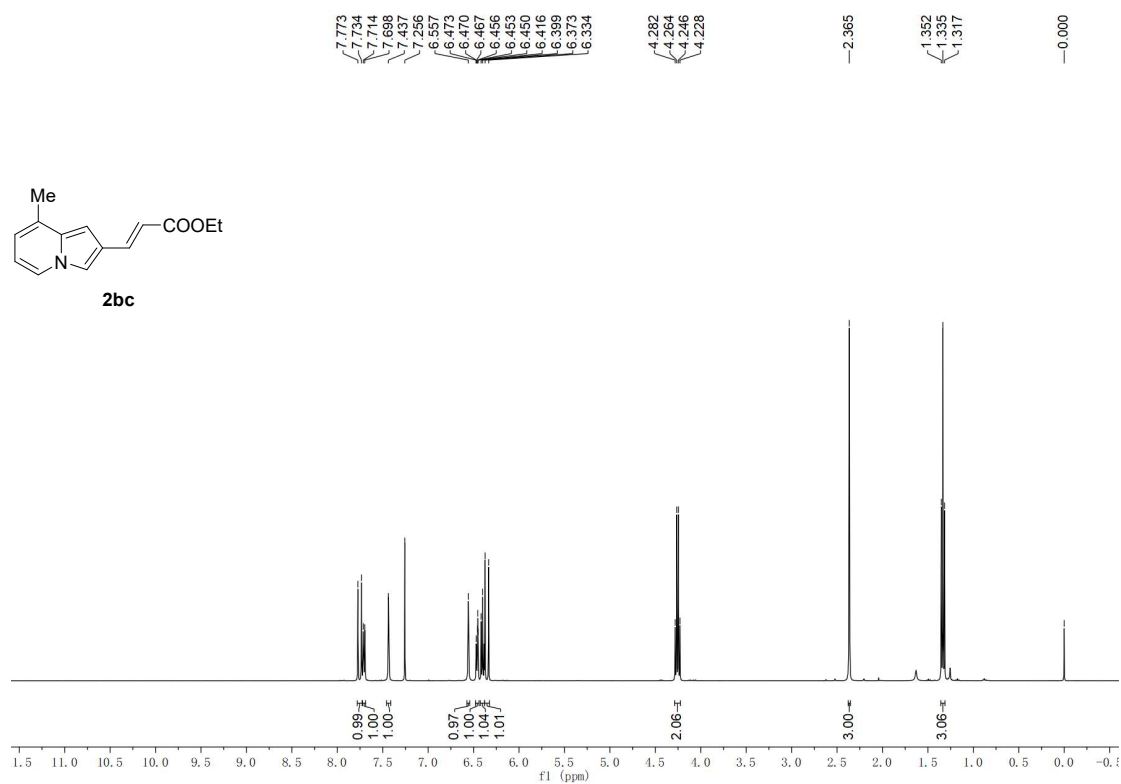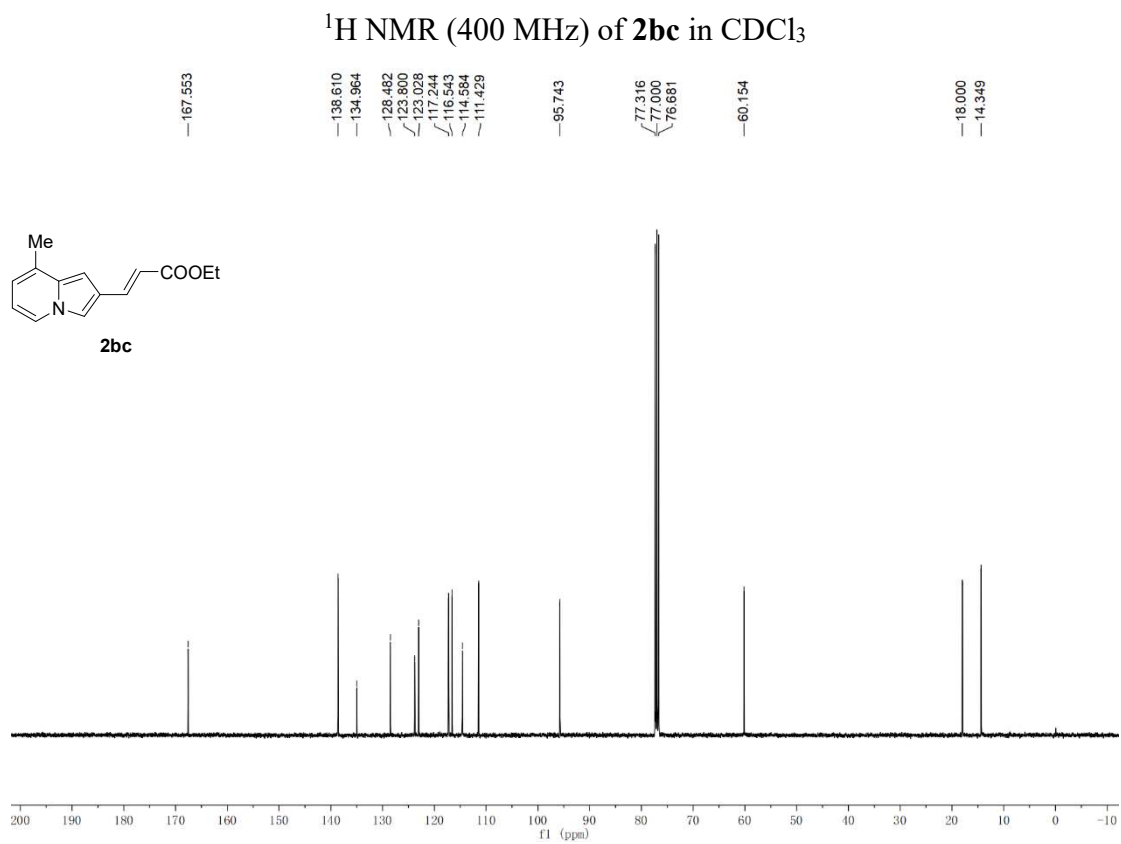

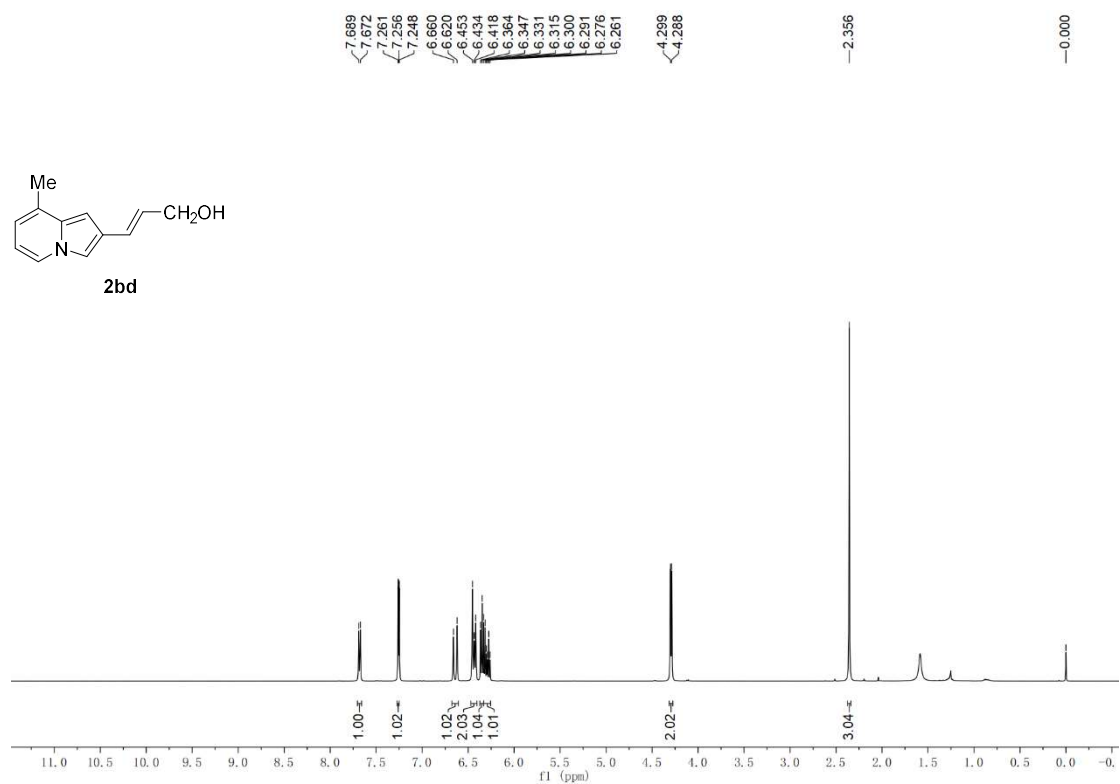

<sup>1</sup>H NMR (400 MHz) of **2bd** in CDCl<sub>3</sub>

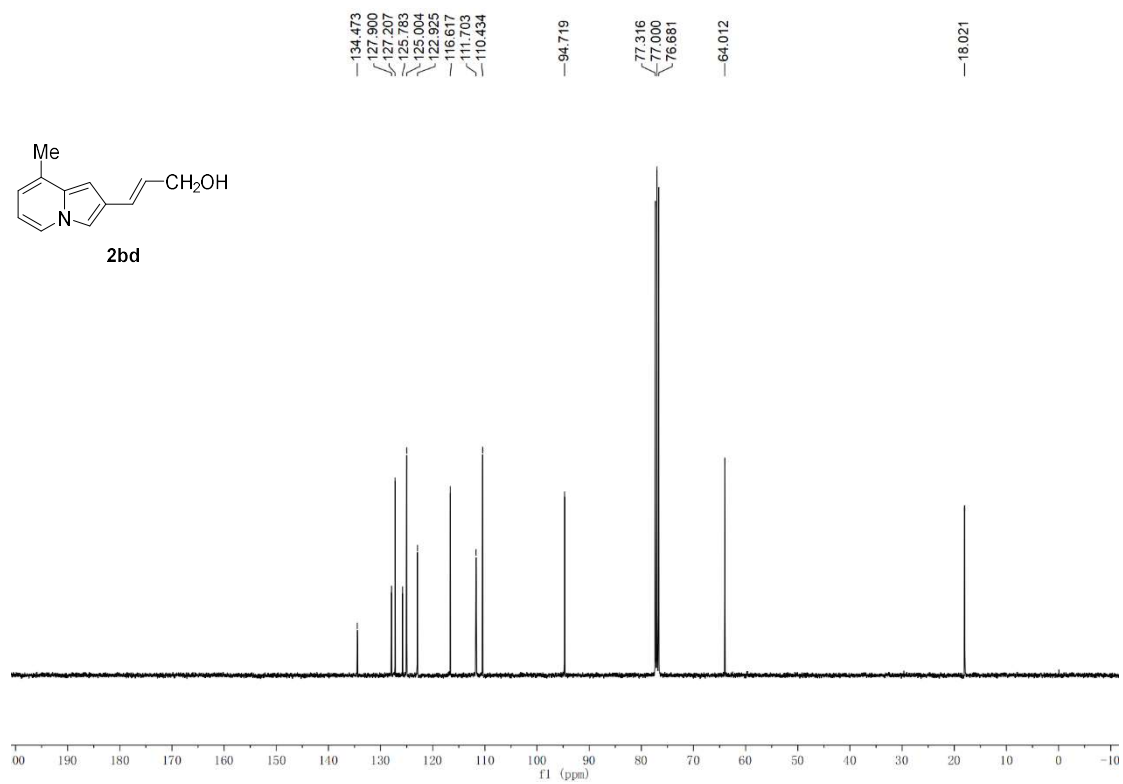

<sup>13</sup>C NMR (100 MHz) of **2bd** in CDCl<sub>3</sub>

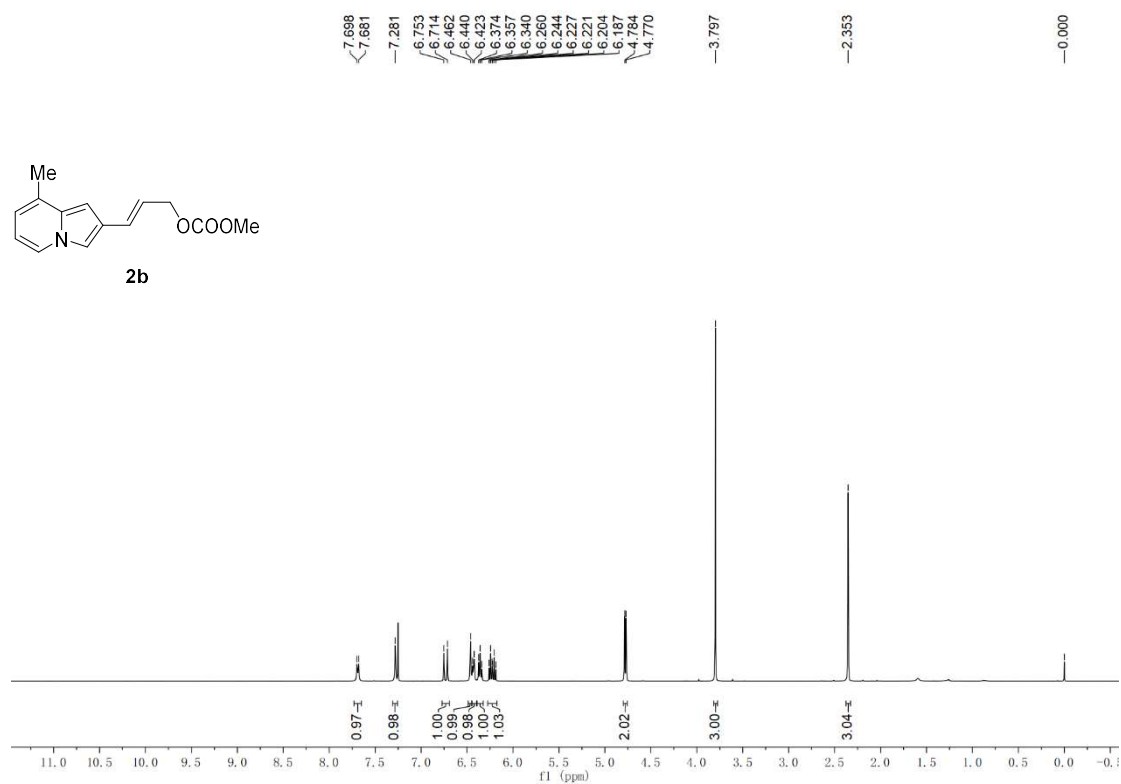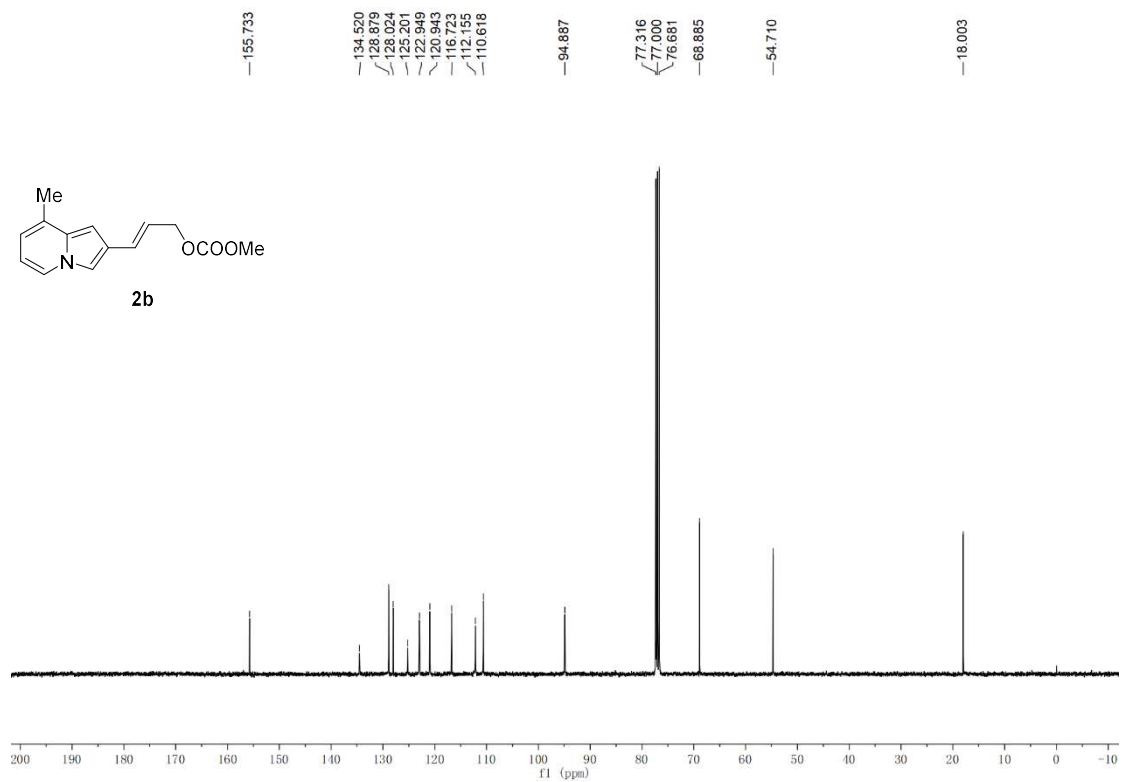



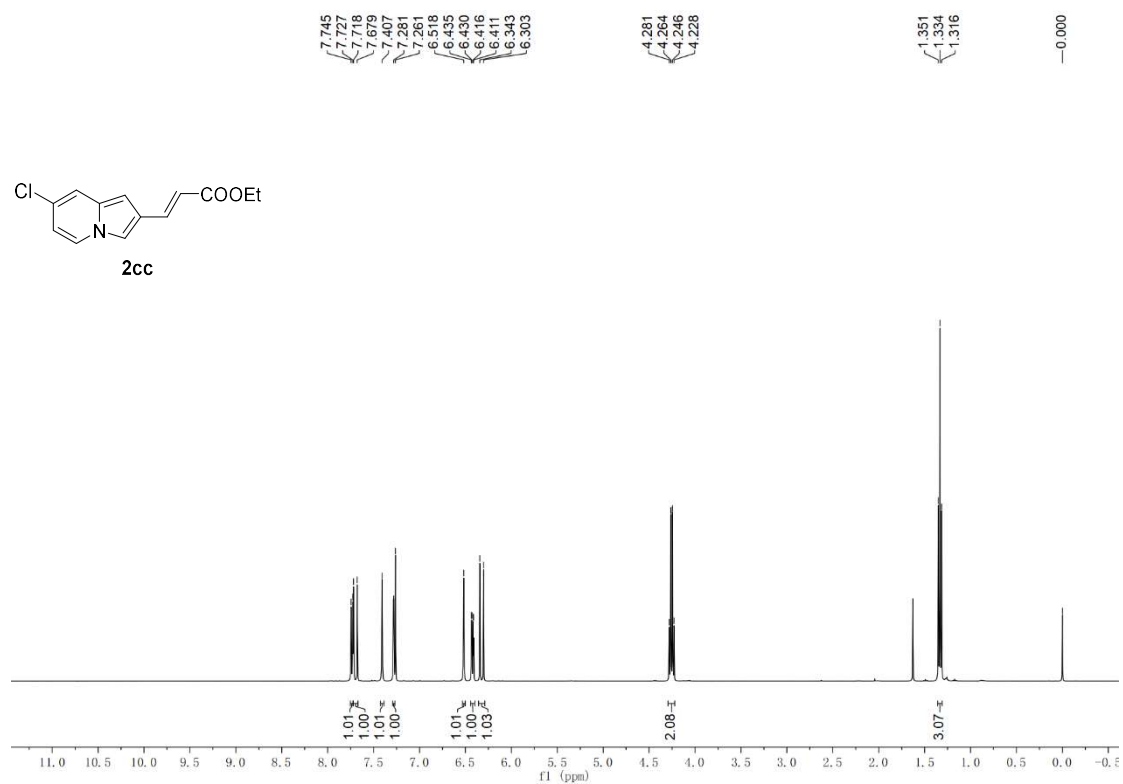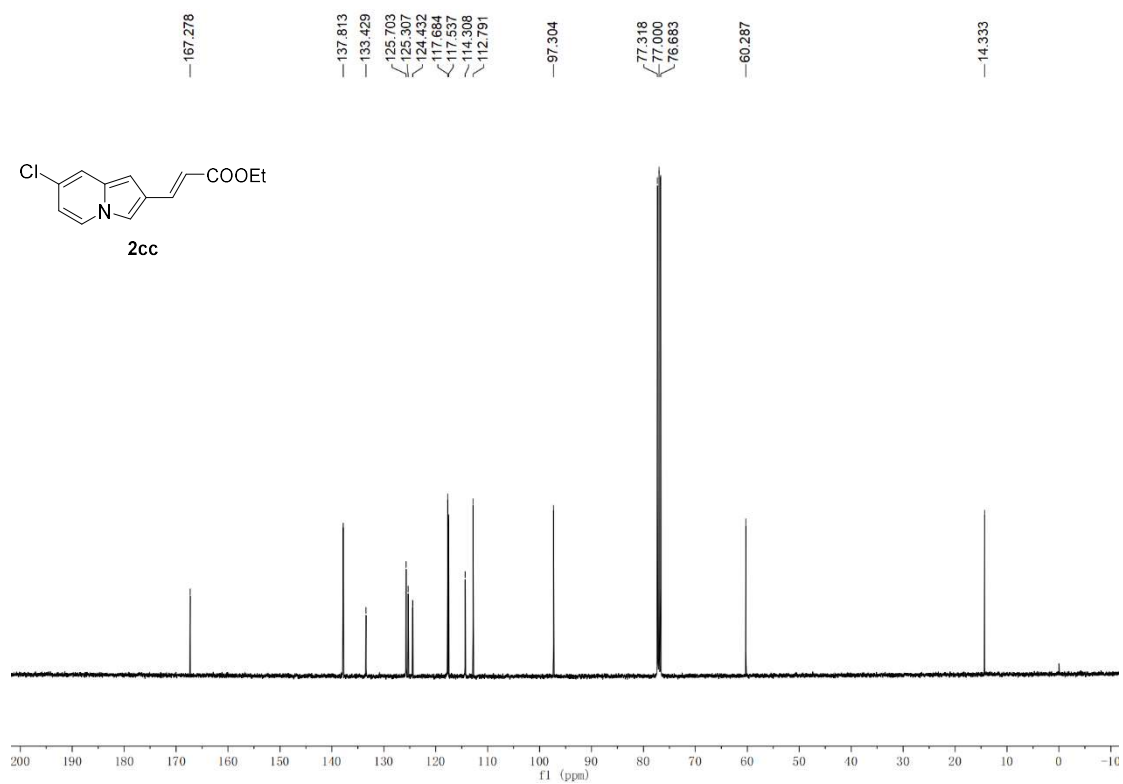

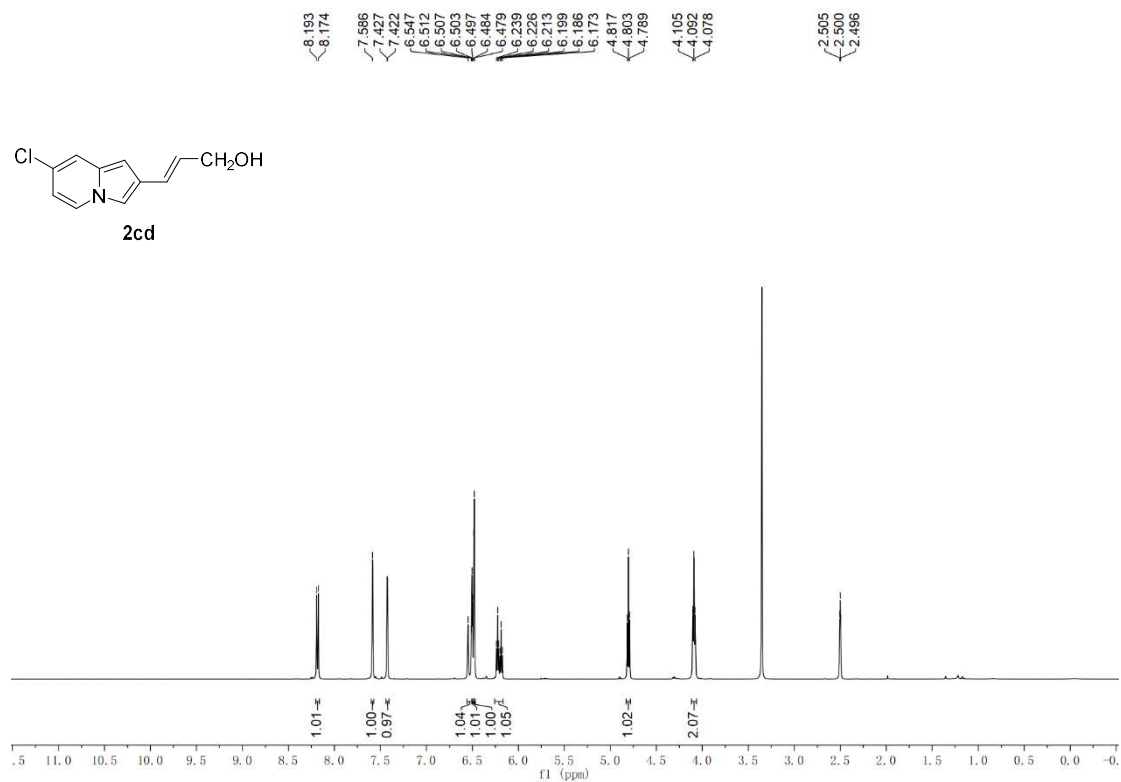

$^1\text{H}$  NMR (400 MHz) of **2cd** in DMSO

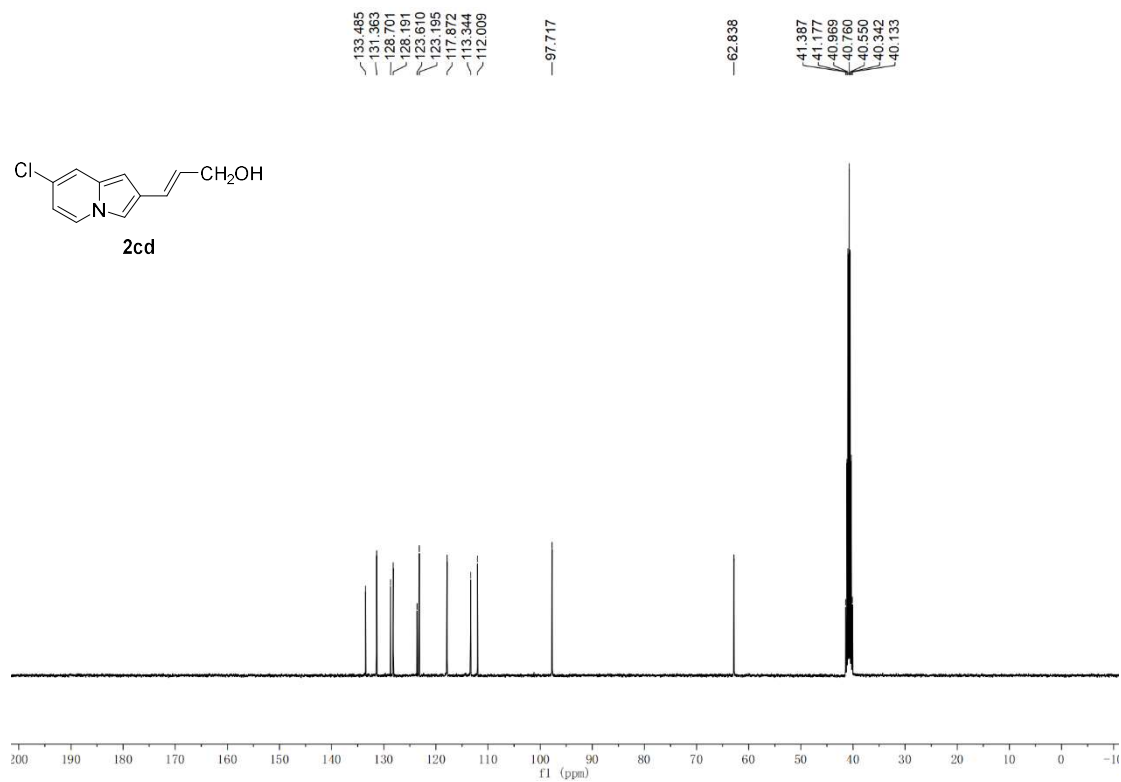

$^{13}\text{C}$  NMR (100 MHz) of **2cd** in DMSO

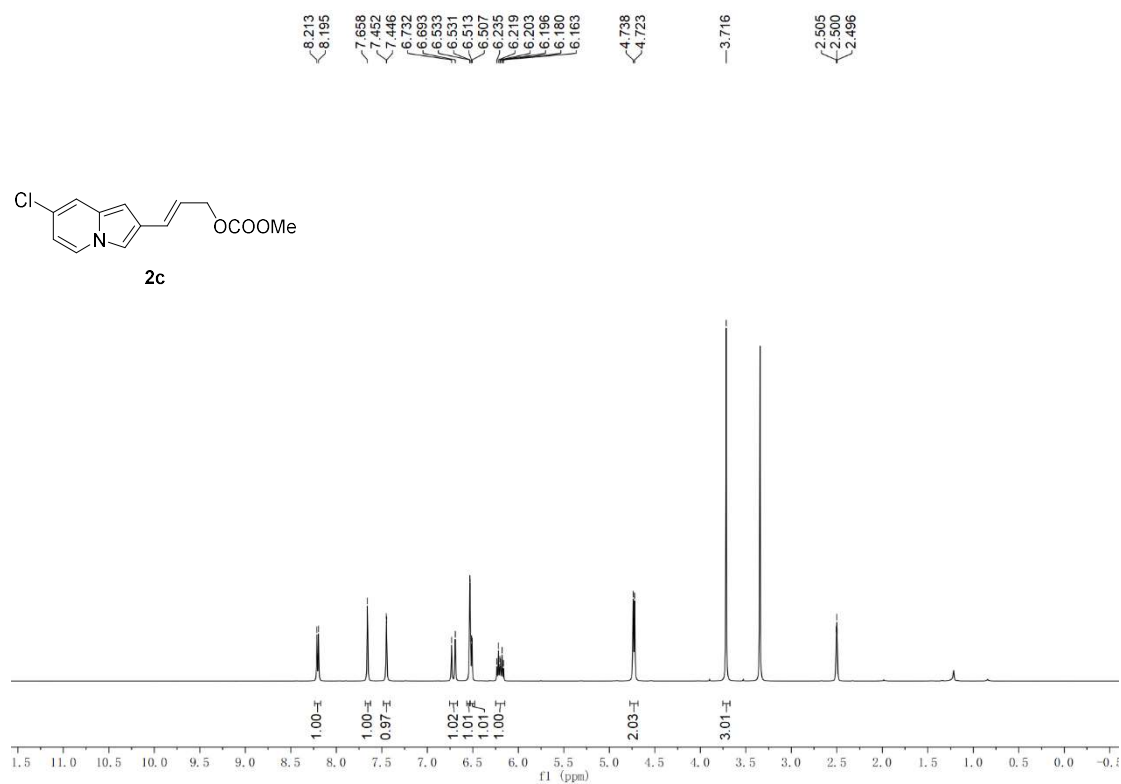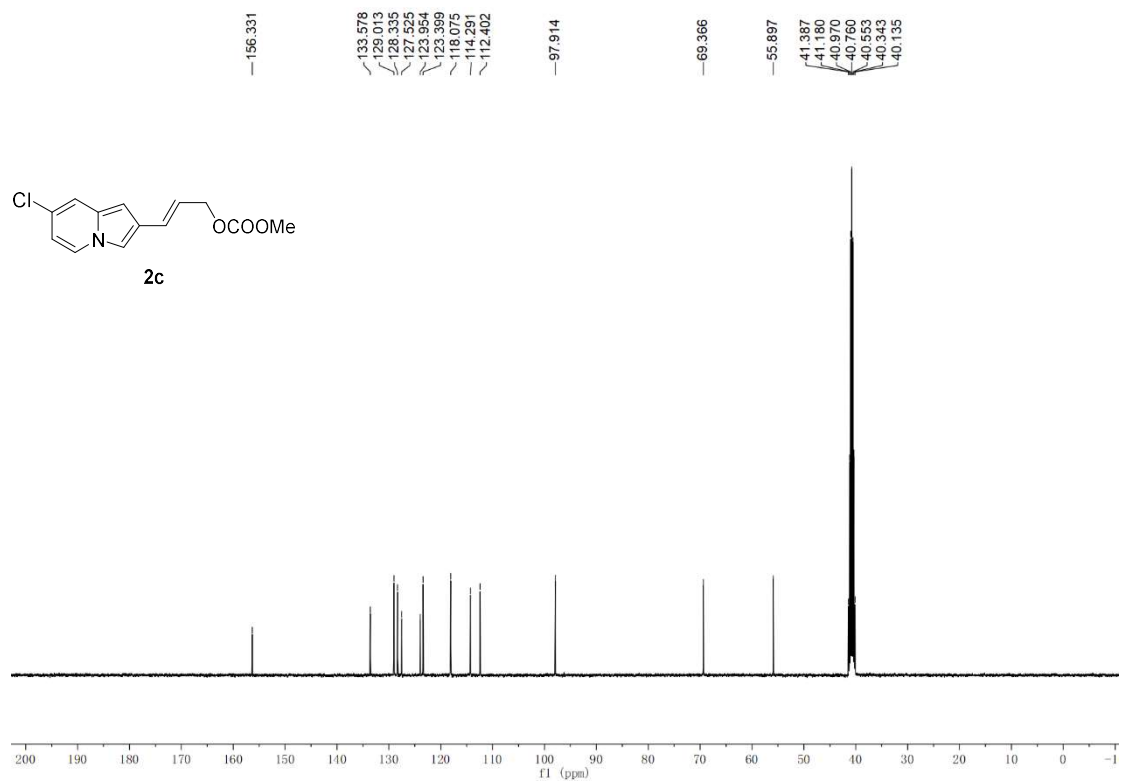

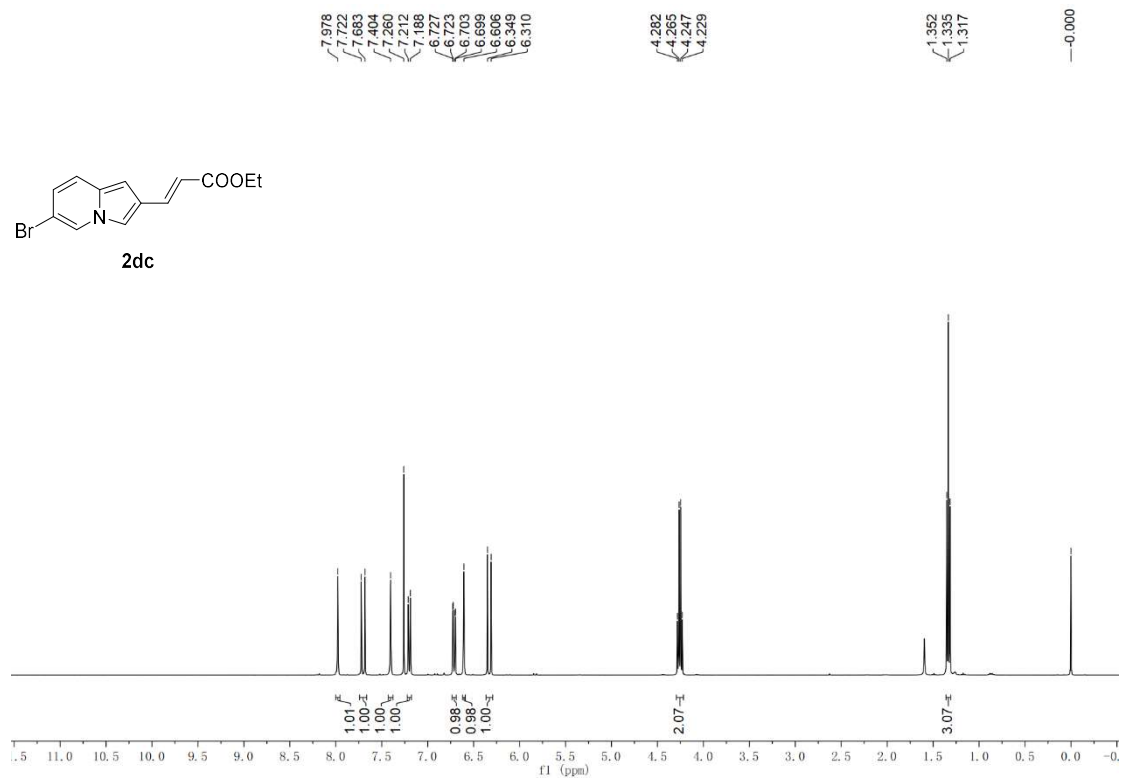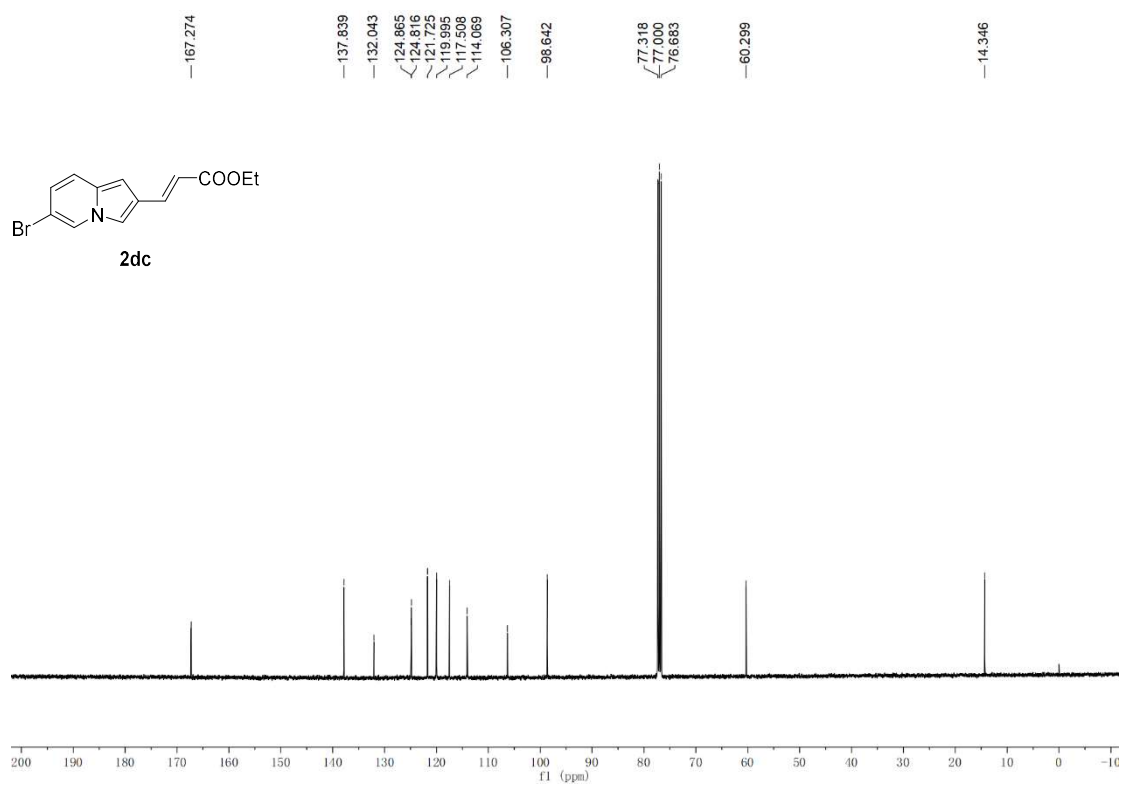

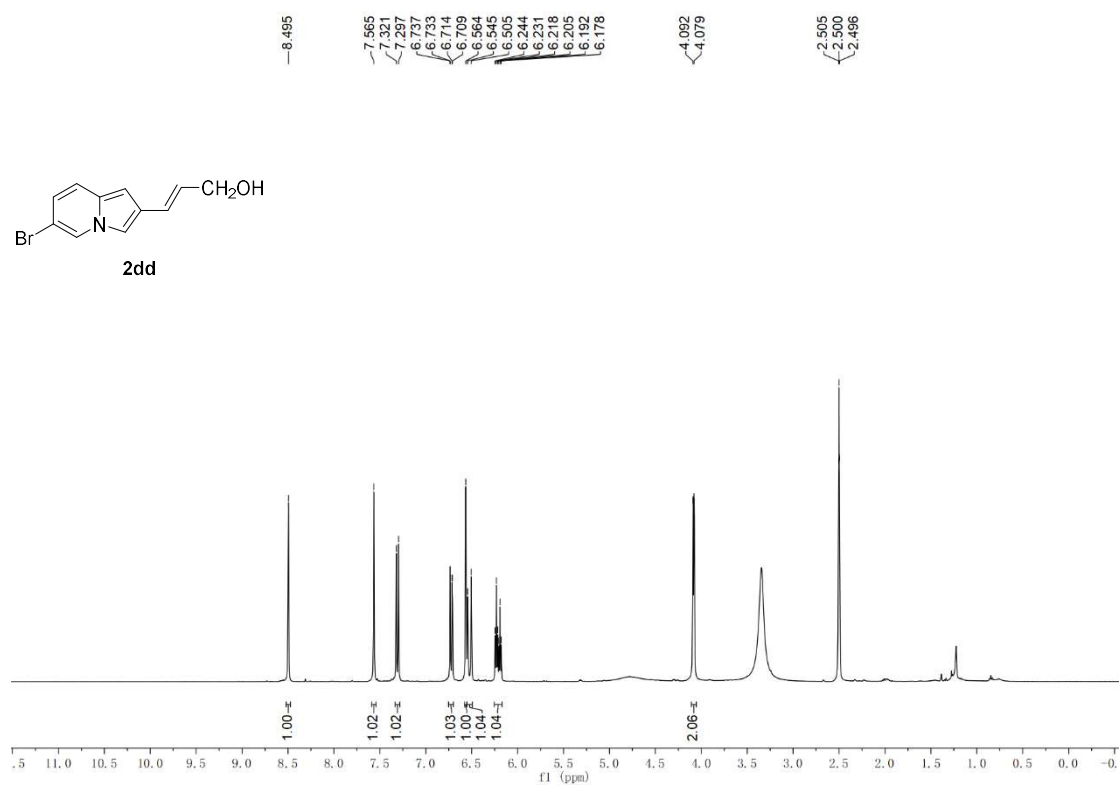

$^1\text{H}$  NMR (400 MHz) of **2dd** in DMSO

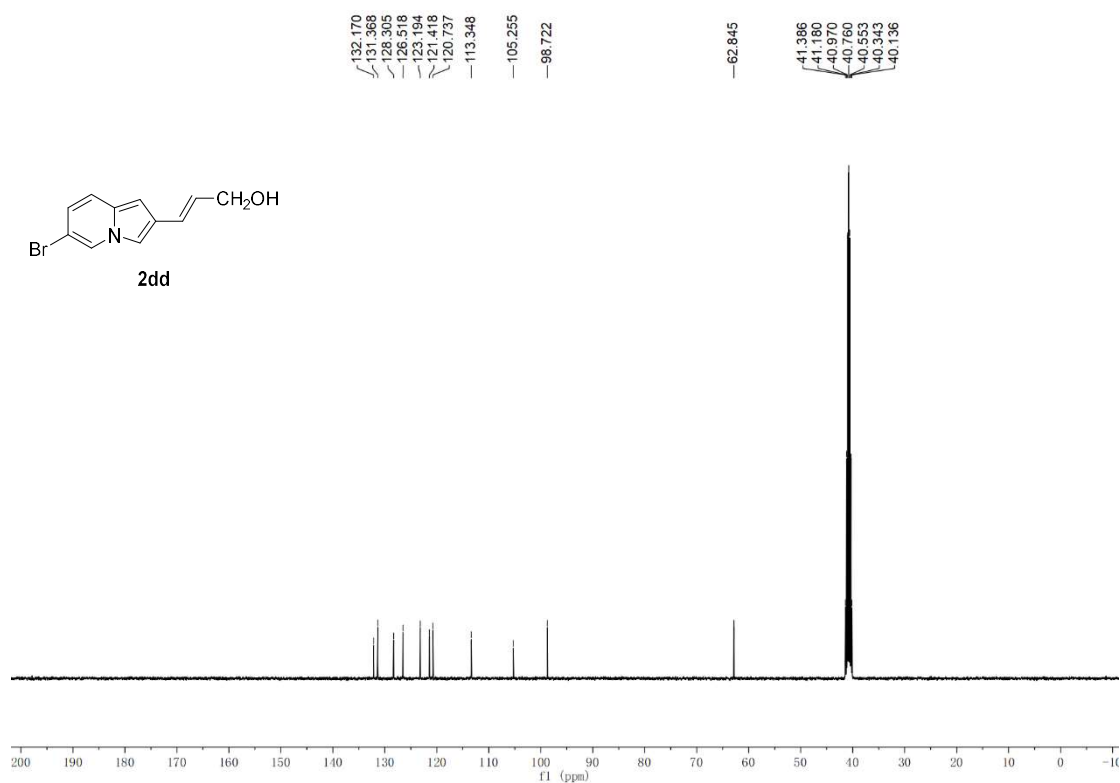

$^{13}\text{C}$  NMR (100 MHz) of **2dd** in DMSO

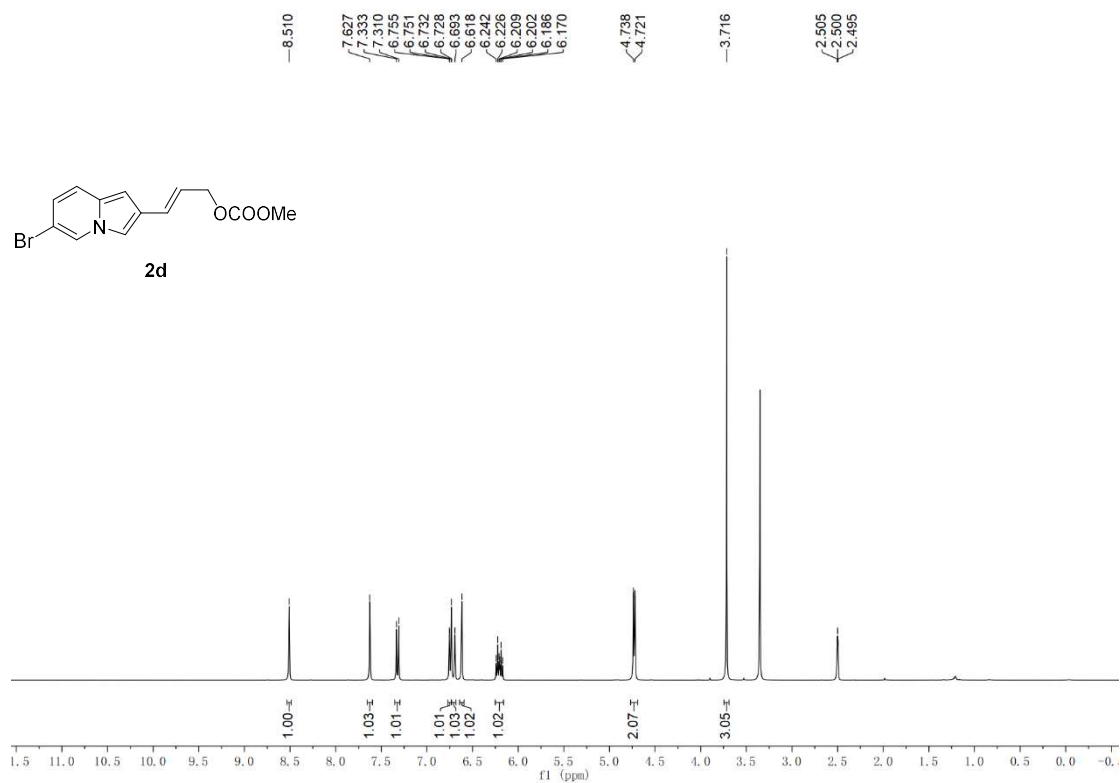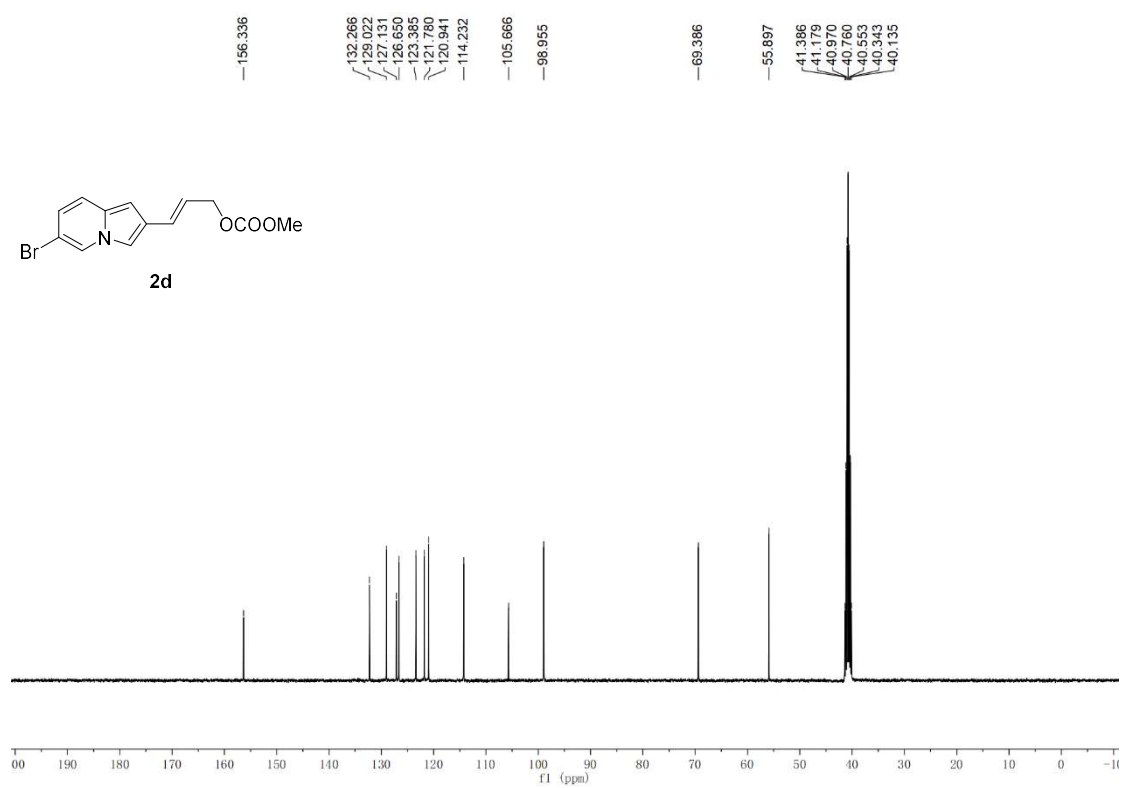

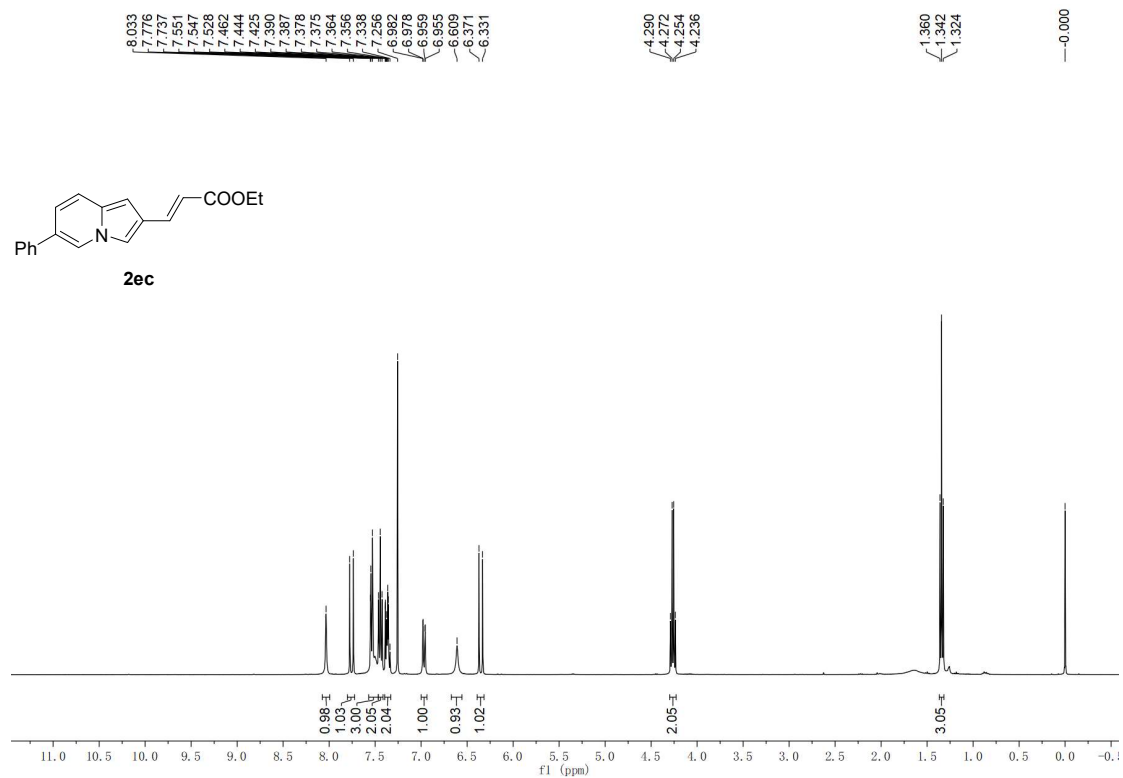

$^1\text{H}$  NMR (400 MHz) of **2ec** in  $\text{CDCl}_3$

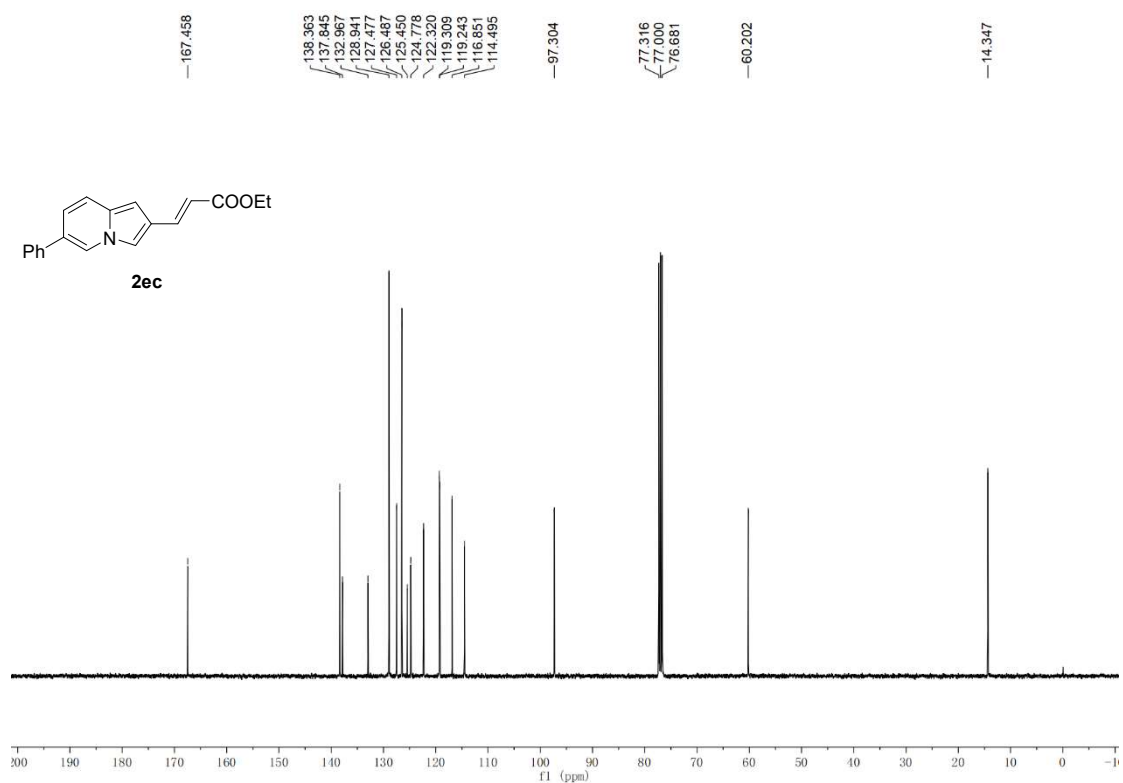

$^{13}\text{C}$  NMR (100 MHz) of **2ec** in  $\text{CDCl}_3$

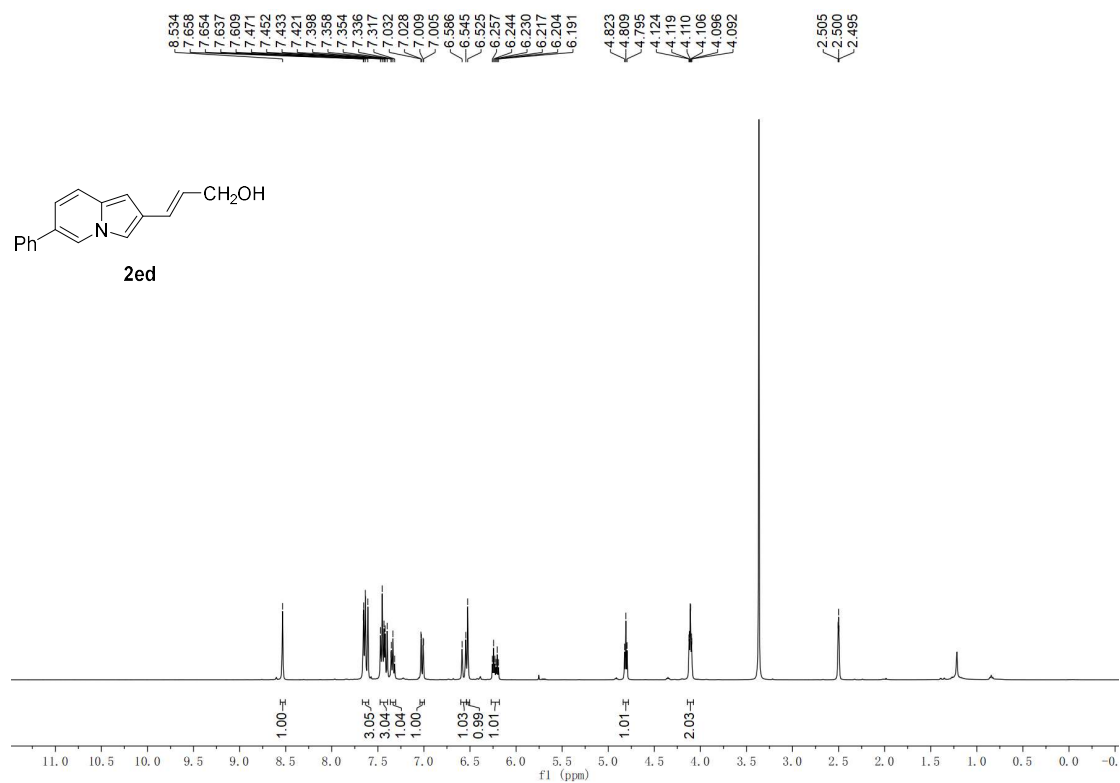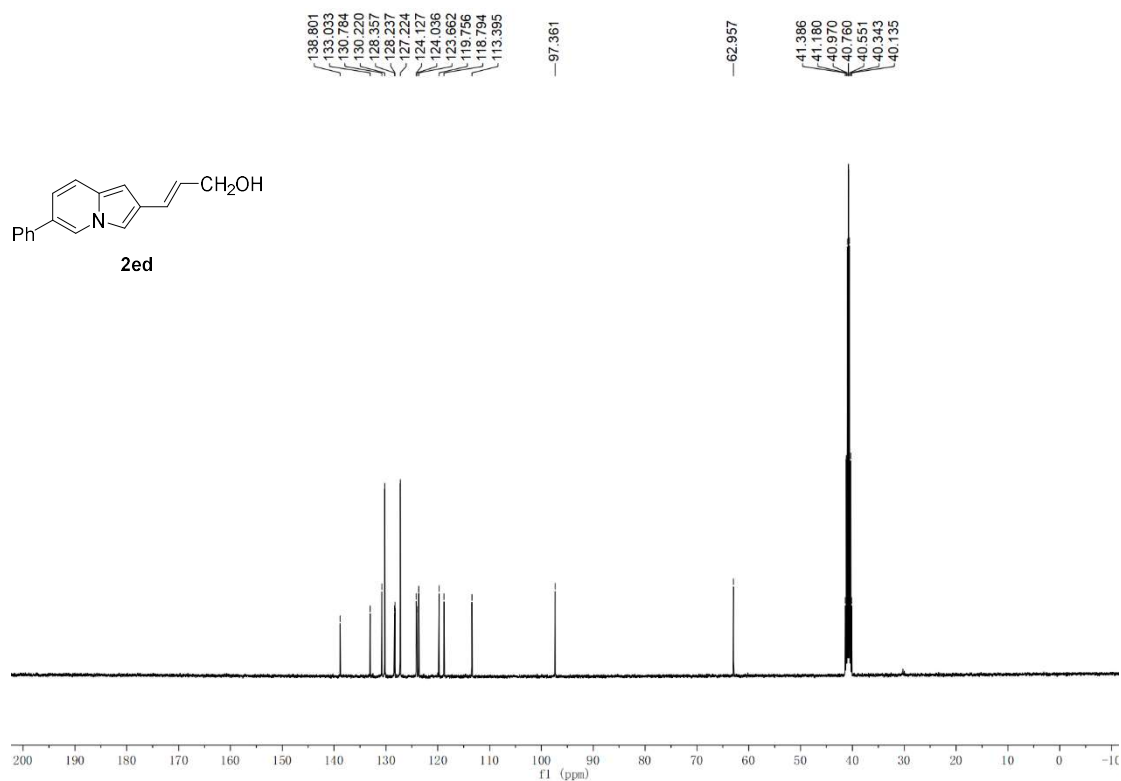



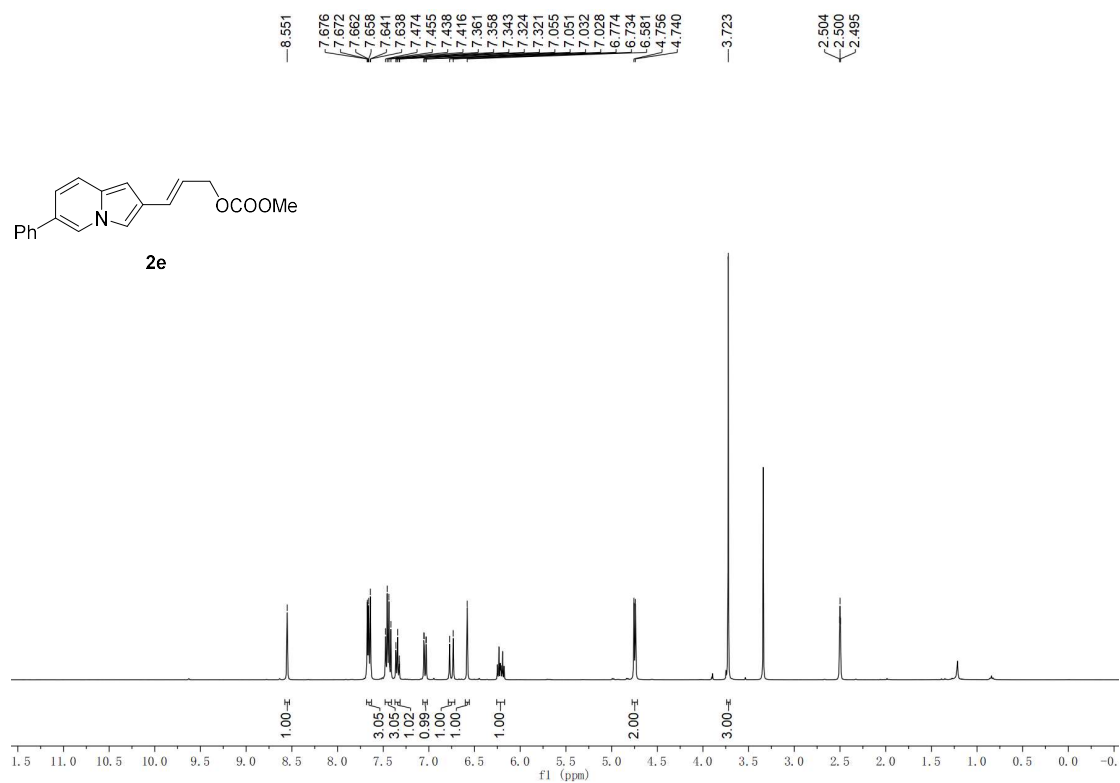

$^1\text{H}$  NMR (400 MHz) of **2e** in DMSO

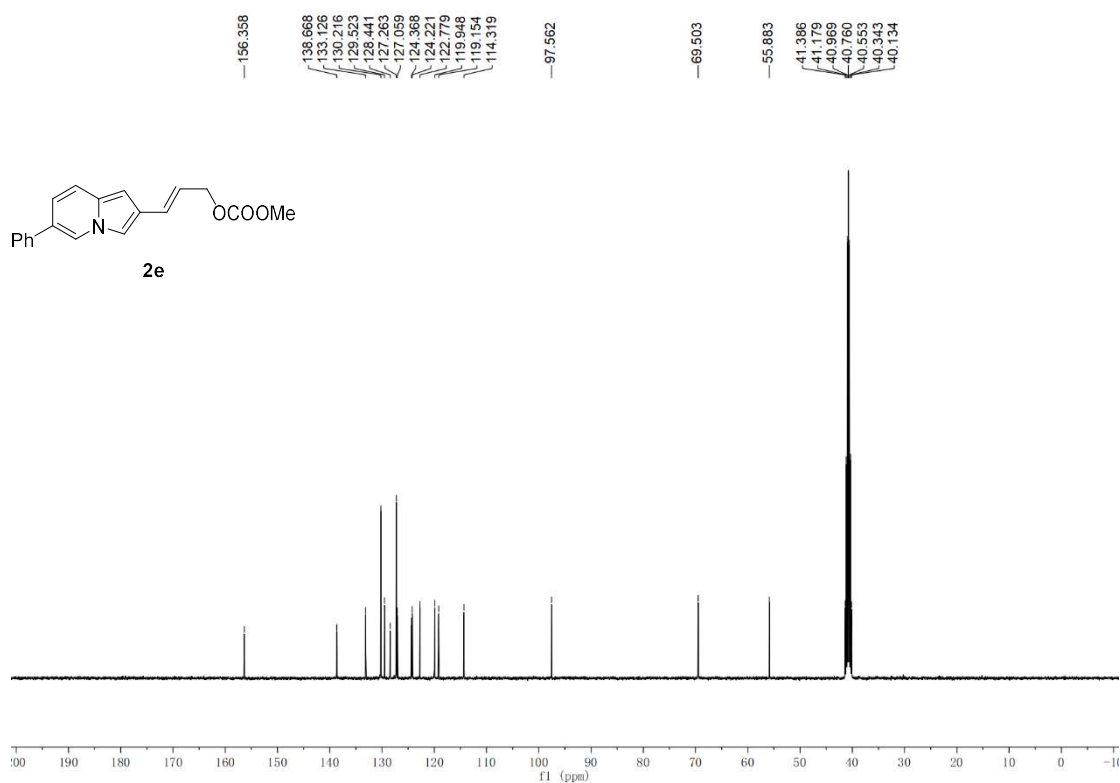

$^{13}\text{C}$  NMR (100 MHz) of **2e** in DMSO

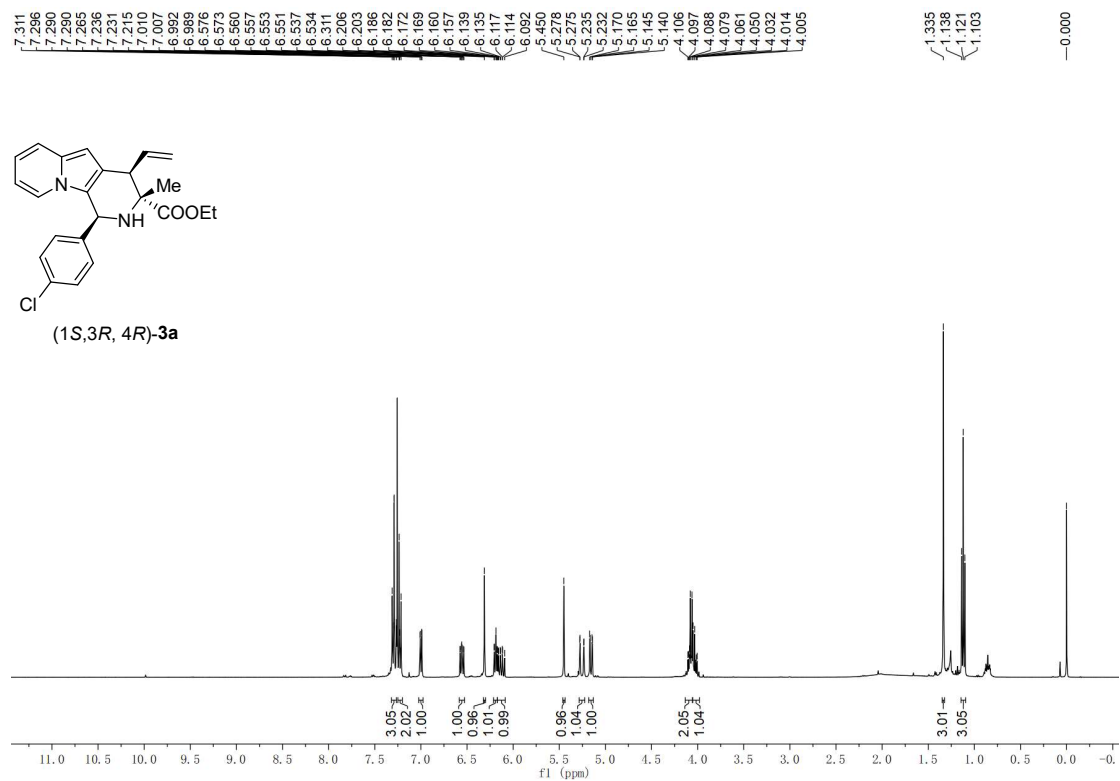

$^1\text{H NMR}$  (400 MHz) of (1*S*, 3*R*, 4*R*)-**3a** in  $\text{CDCl}_3$

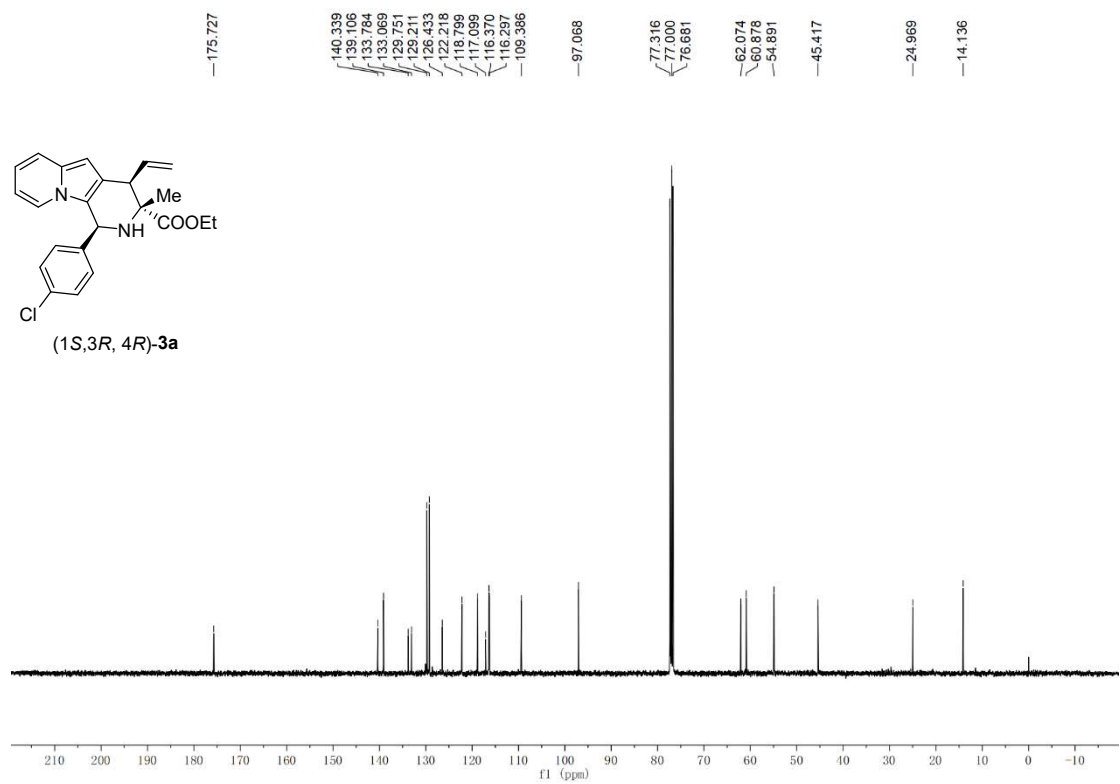

$^{13}\text{C NMR}$  (100 MHz) of (1*S*, 3*R*, 4*R*)-**3a** in  $\text{CDCl}_3$

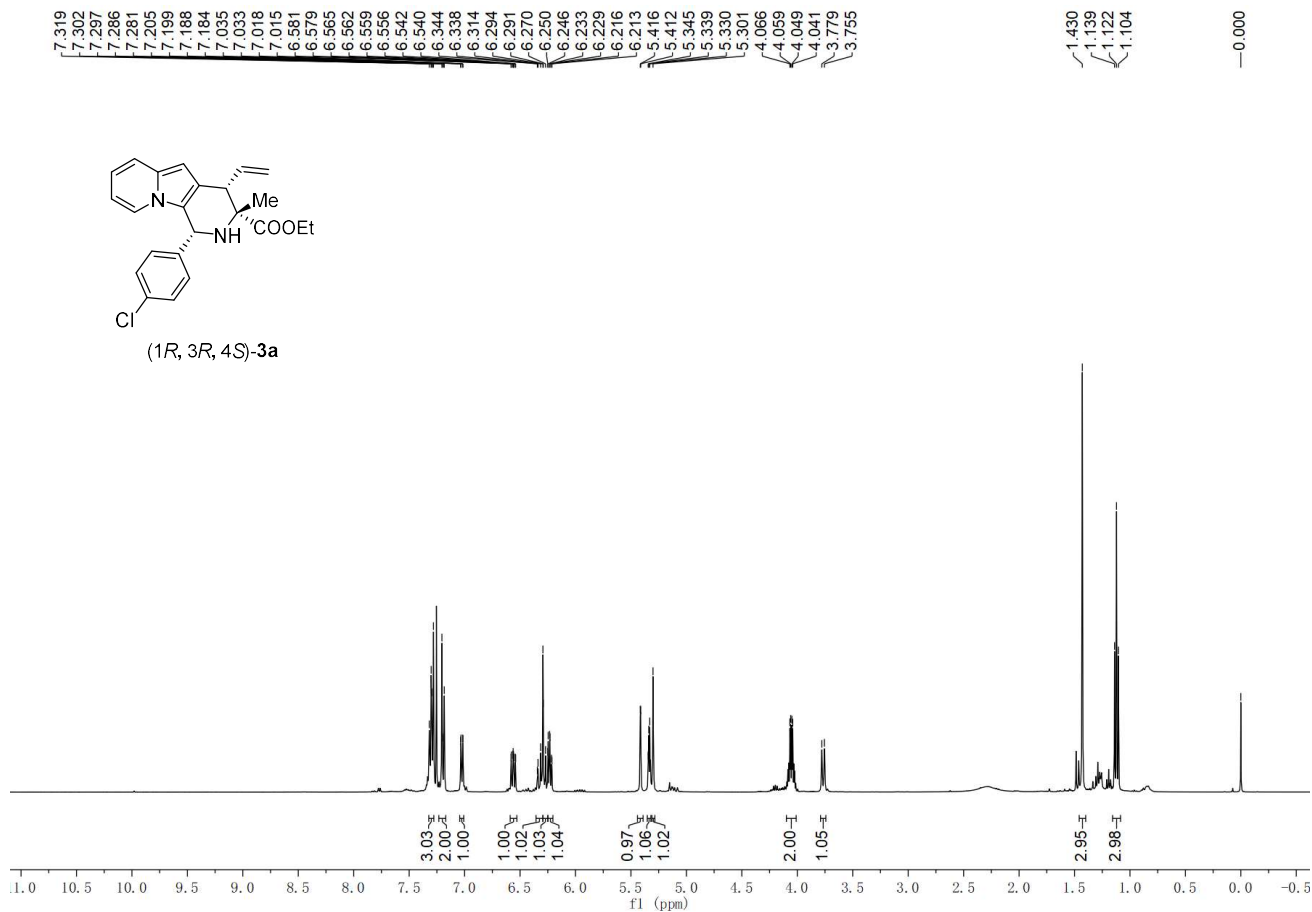

<sup>1</sup>H NMR (400 MHz) of (1*R*, 3*R*, 4*S*)-**3a** in CDCl<sub>3</sub>

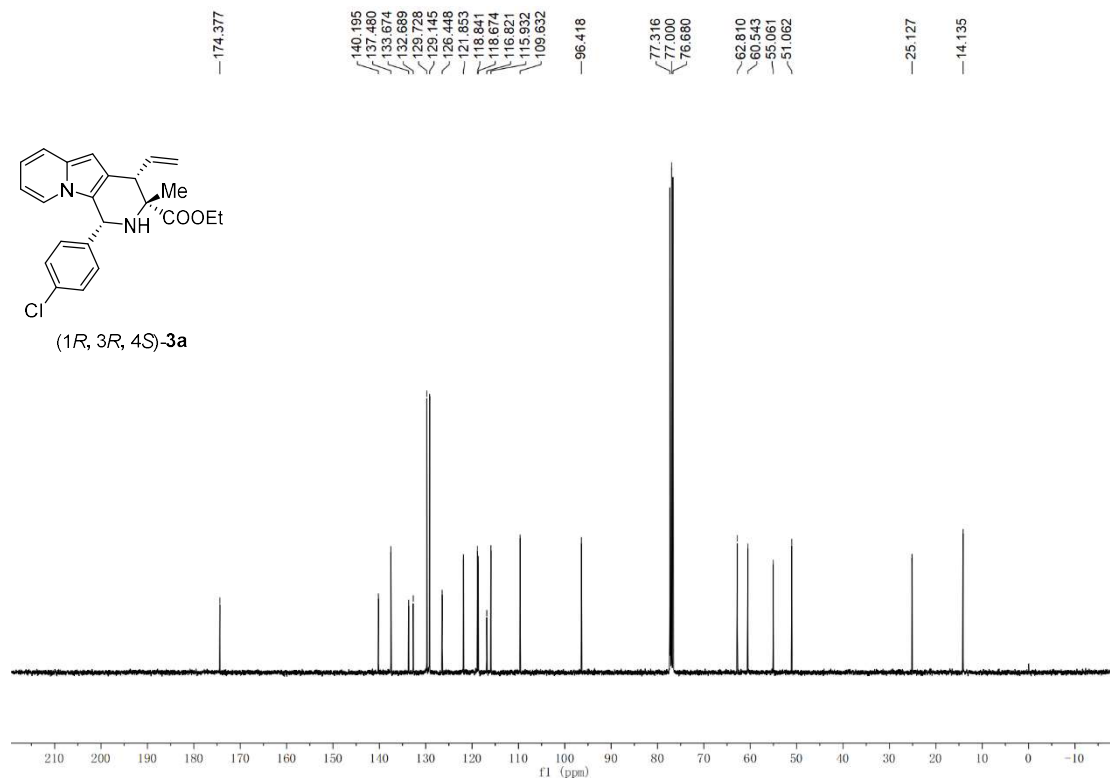

<sup>13</sup>C NMR (100 MHz) of (1*R*, 3*R*, 4*S*)-**3a** in CDCl<sub>3</sub>

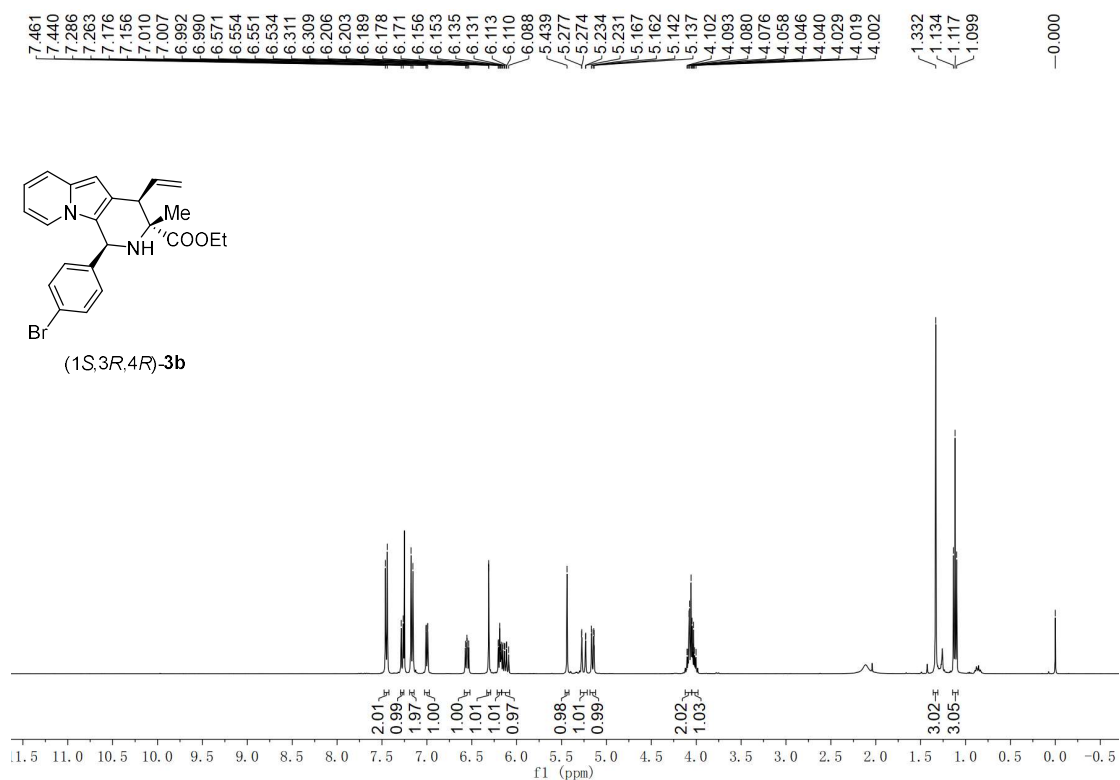

<sup>1</sup>H NMR (400 MHz) of (1*S*, 3*R*, 4*R*)-**3b** in CDCl<sub>3</sub>

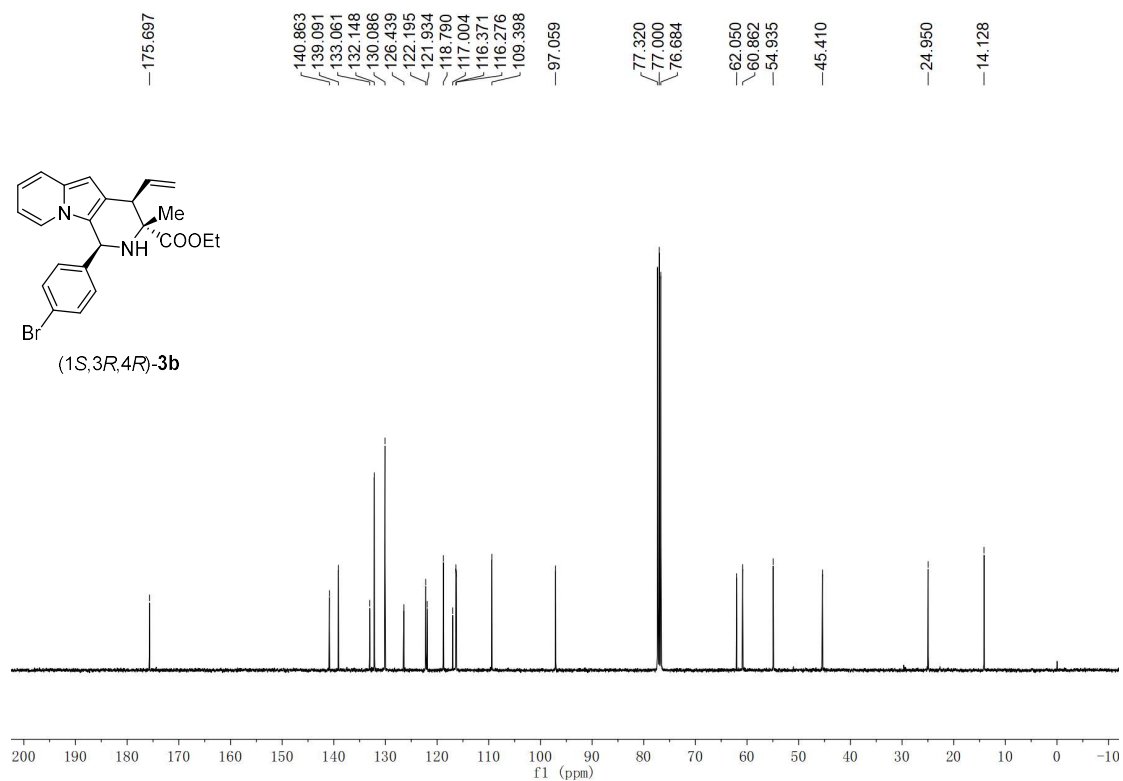

<sup>13</sup>C NMR (100 MHz) of (1*S*, 3*R*, 4*R*)-**3b** in CDCl<sub>3</sub>

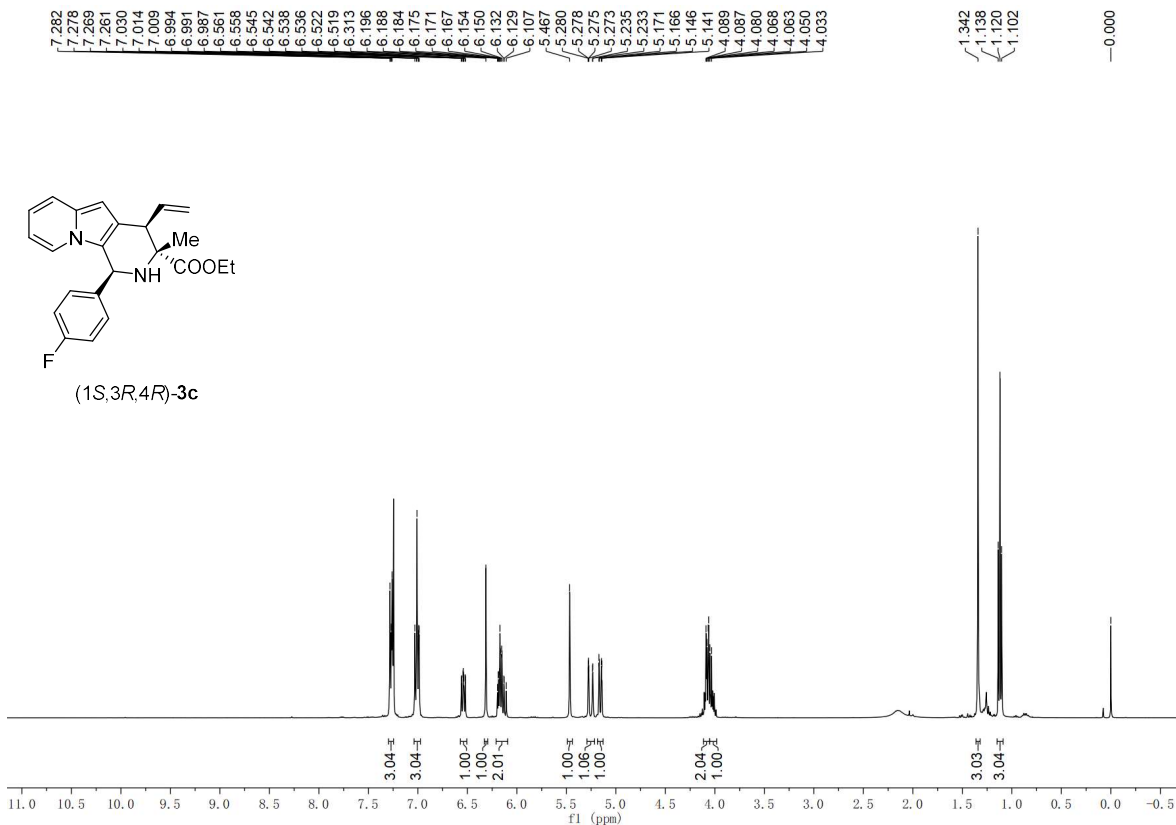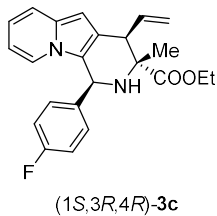

$^1\text{H NMR}$  (400 MHz) of (1*S*, 3*R*, 4*R*)-**3c** in  $\text{CDCl}_3$

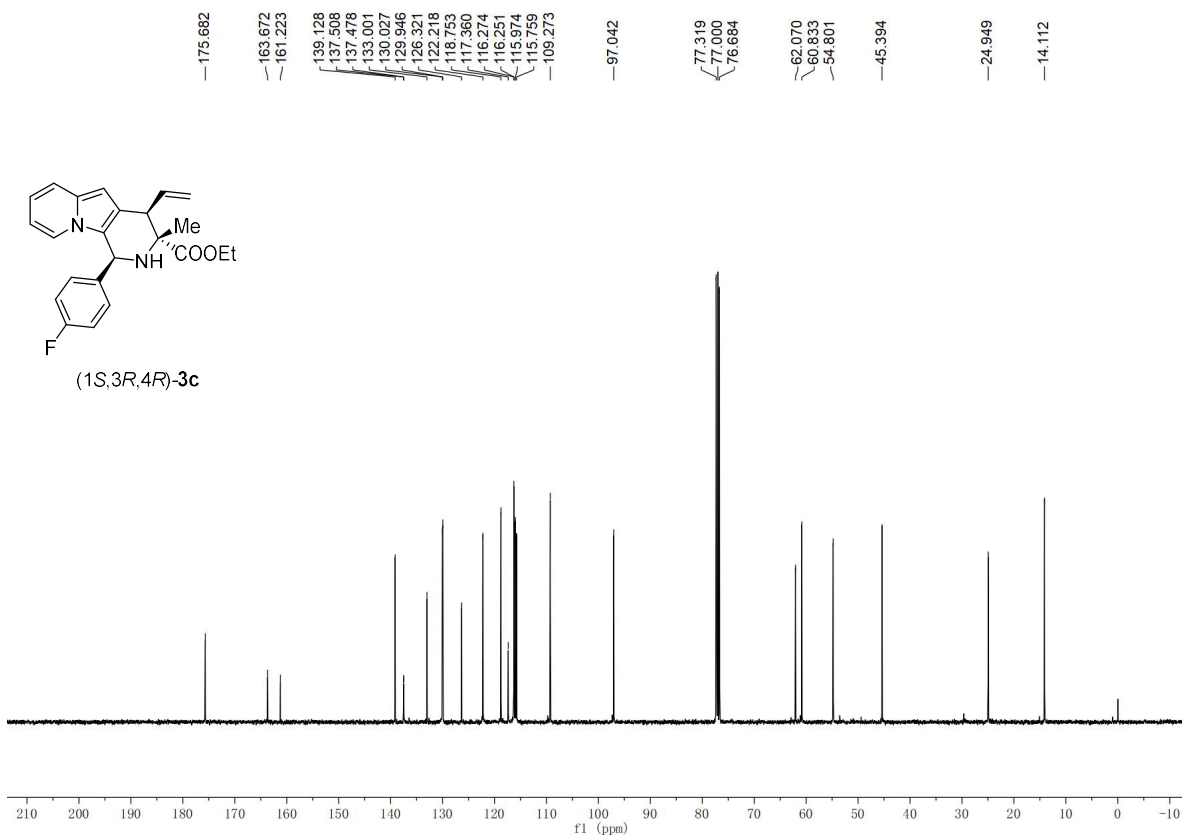

$^{13}\text{C NMR}$  (100 MHz) of (1*S*, 3*R*, 4*R*)-**3c** in  $\text{CDCl}_3$

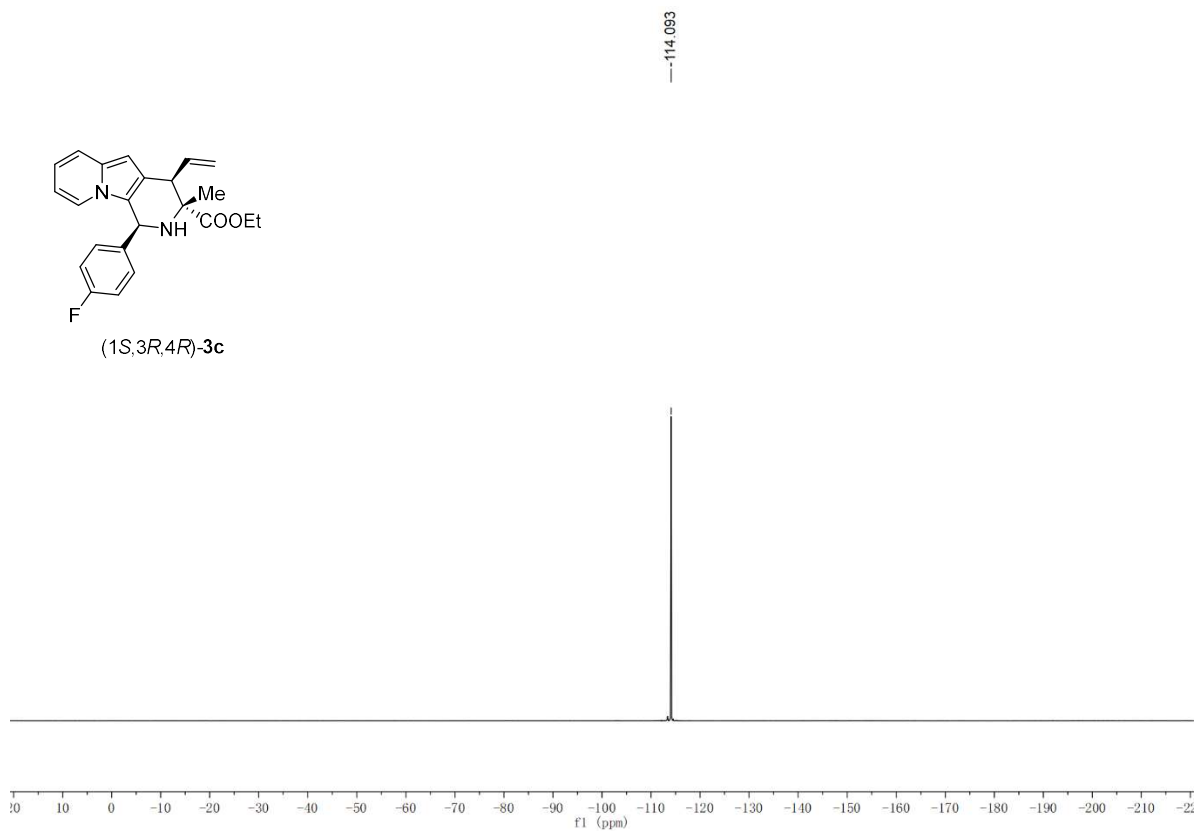

$^{19}\text{F}$  NMR (100 MHz) of (1*S*, 3*R*, 4*R*)-**3c** in  $\text{CDCl}_3$

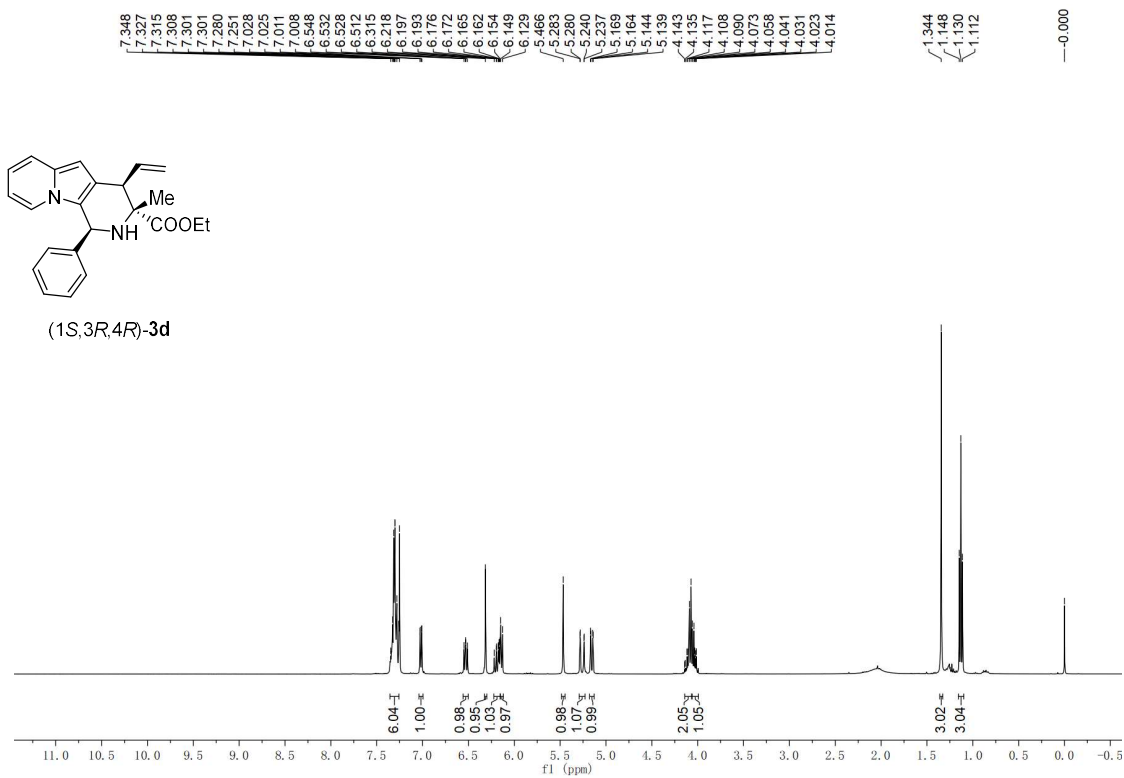

<sup>1</sup>H NMR (400 MHz) of (1*S*, 3*R*, 4*R*)-**3d** in CDCl<sub>3</sub>

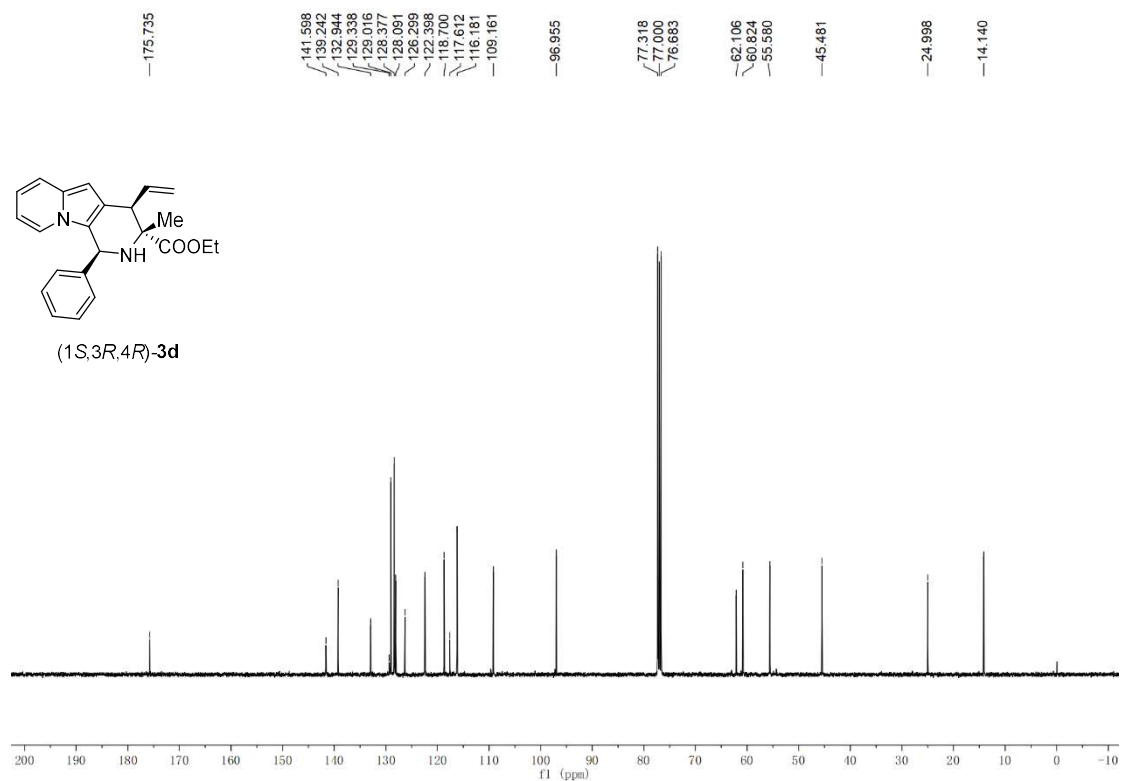

<sup>13</sup>C NMR (100 MHz) of (1*S*, 3*R*, 4*R*)-**3d** in CDCl<sub>3</sub>

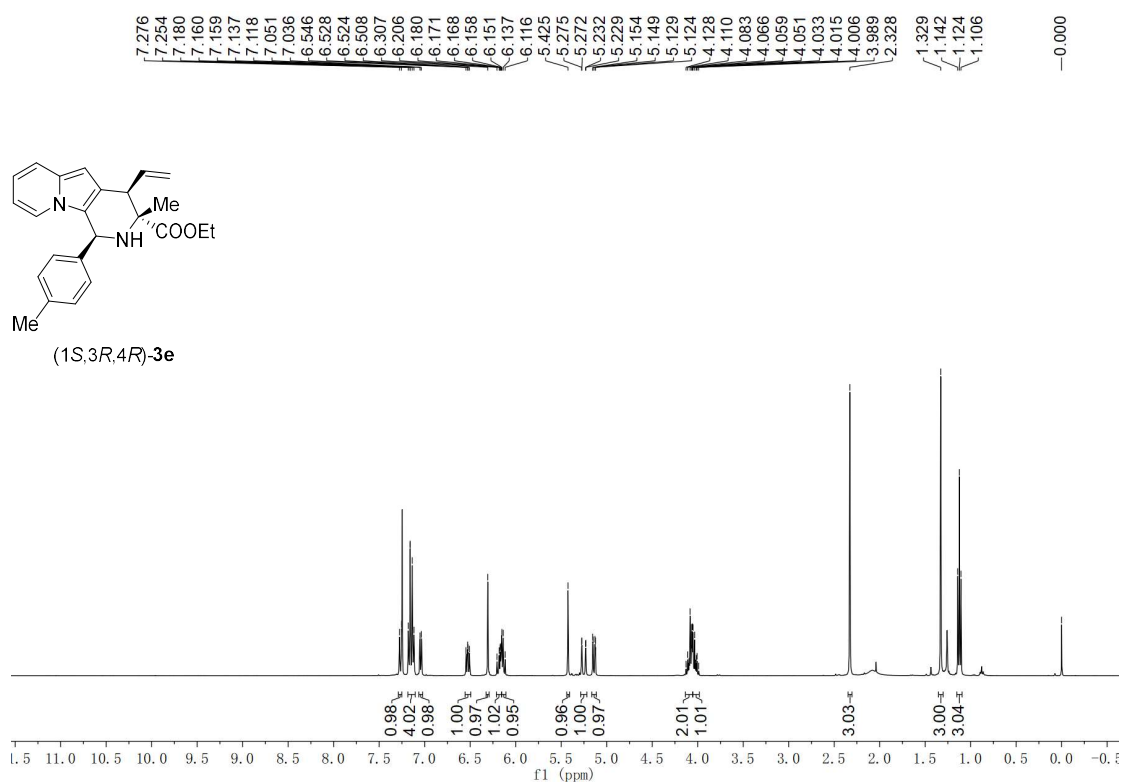

<sup>1</sup>H NMR (400 MHz) of (1*S*, 3*R*, 4*R*)-**3e** in CDCl<sub>3</sub>

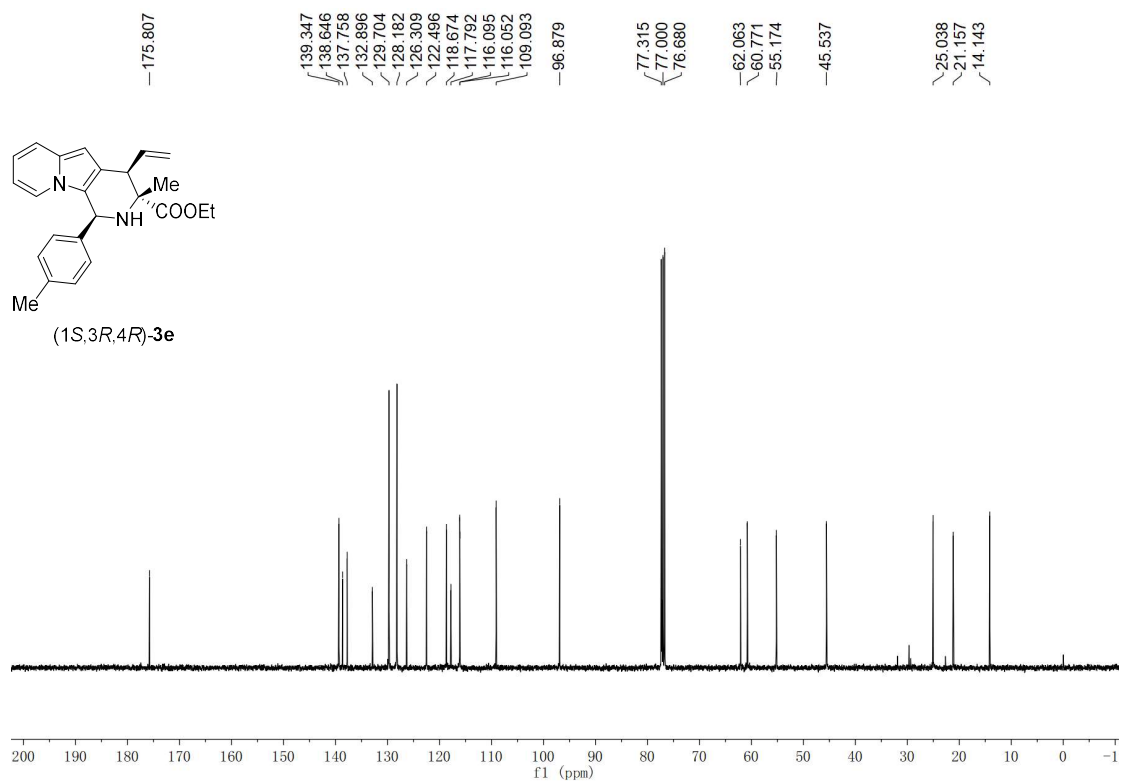

<sup>13</sup>C NMR (100 MHz) of (1*S*, 3*R*, 4*R*)-**3e** in CDCl<sub>3</sub>



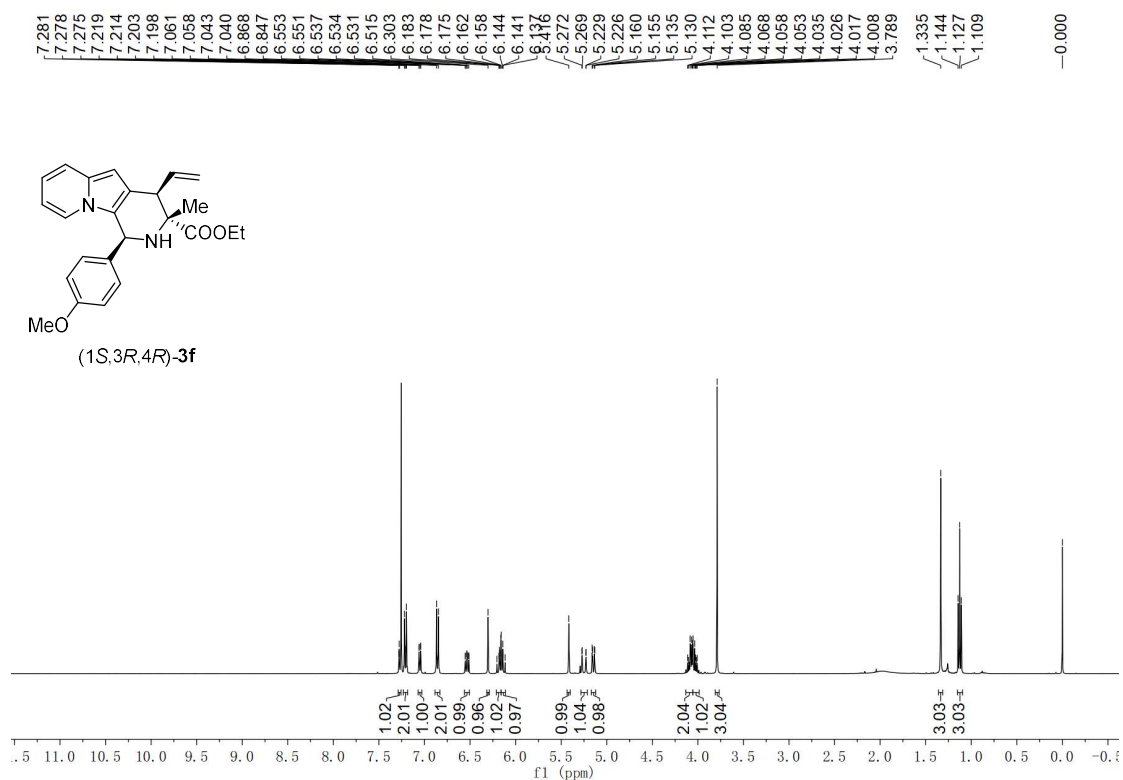

<sup>1</sup>H NMR (400 MHz) of (1*S*, 3*R*, 4*R*)-**3f** in CDCl<sub>3</sub>

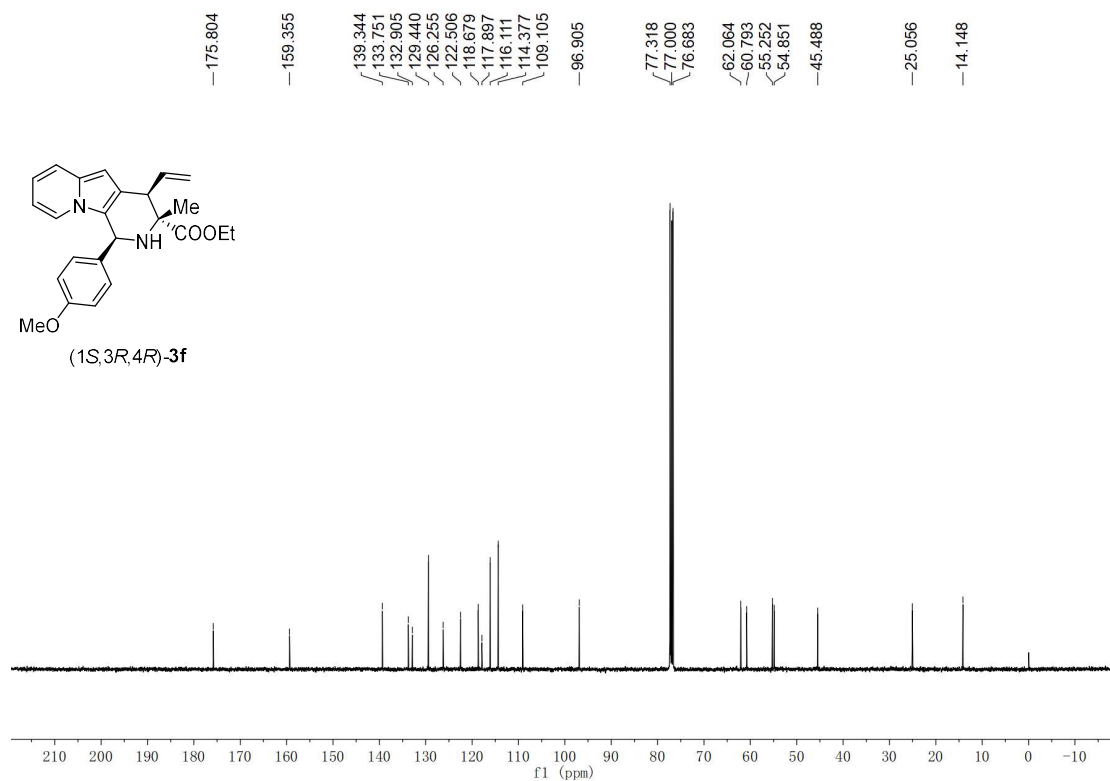

<sup>13</sup>C NMR (100 MHz) of (1*S*, 3*R*, 4*R*)-**3f** in CDCl<sub>3</sub>

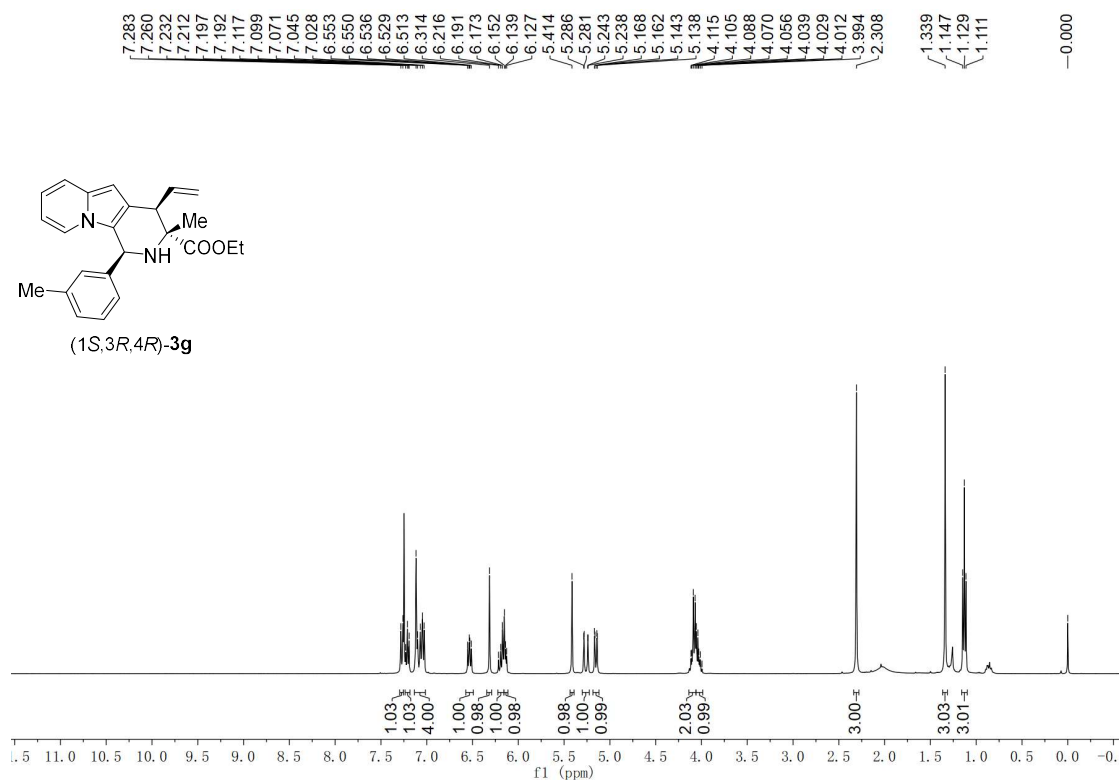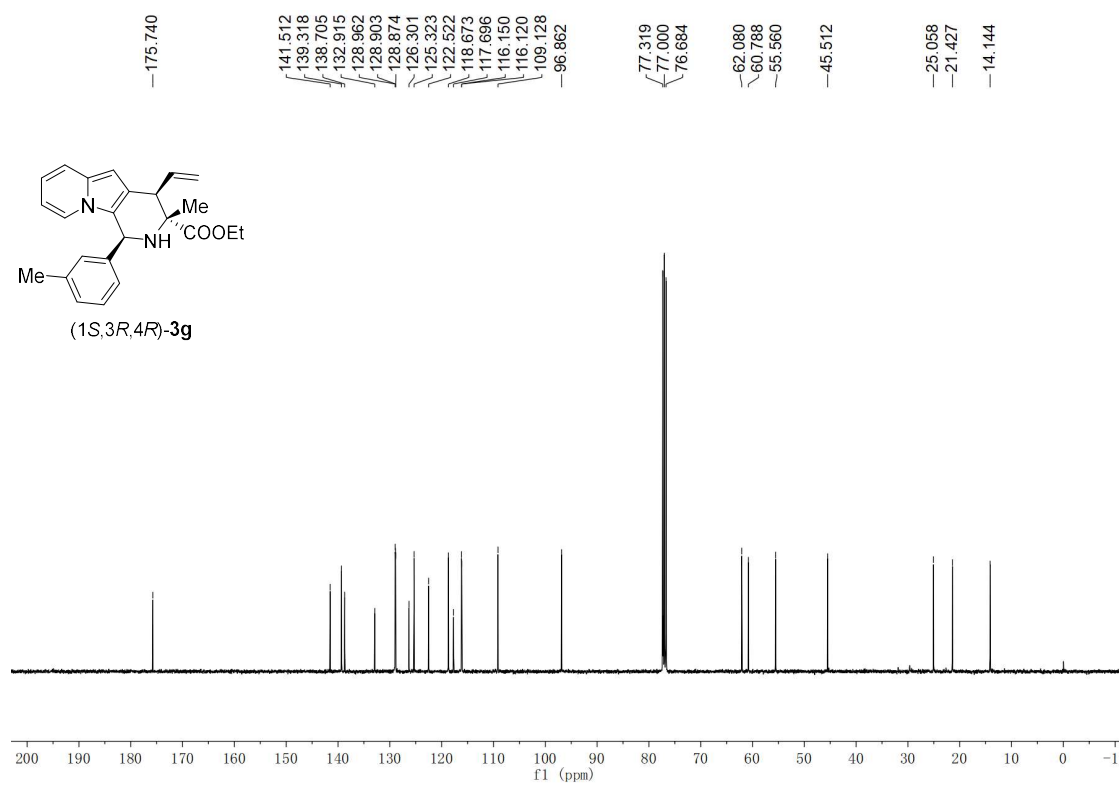

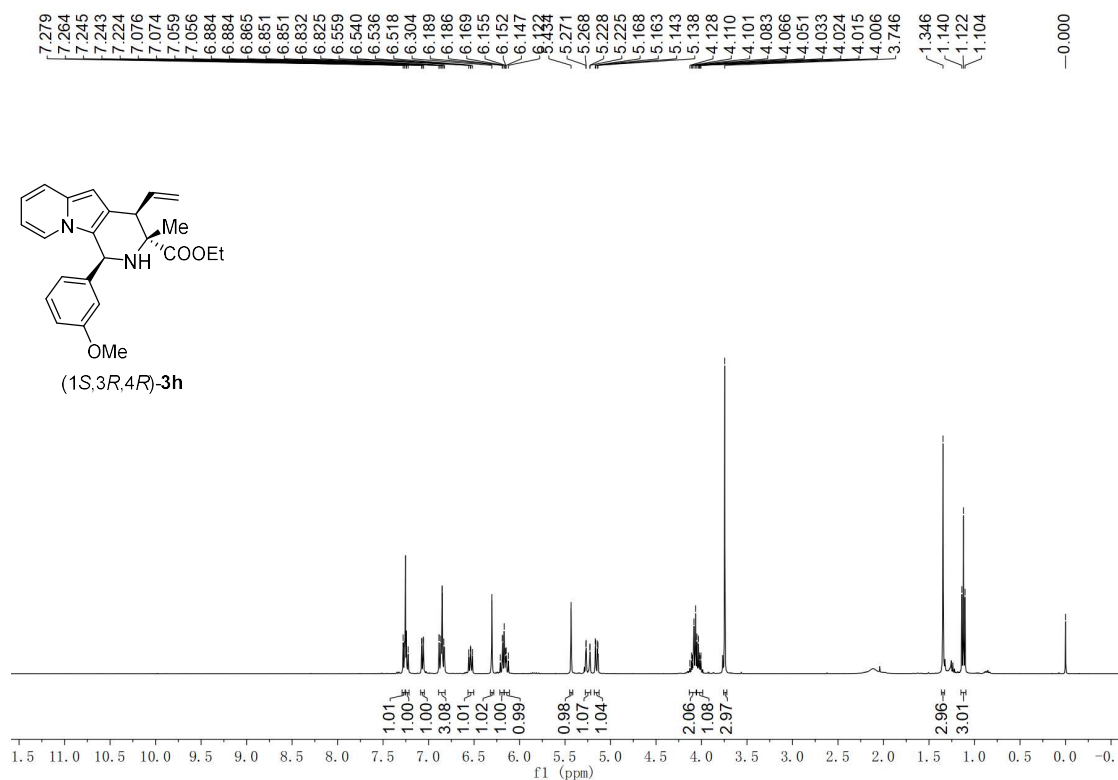

$^1\text{H}$  NMR (400 MHz) of (1*S*, 3*R*, 4*R*)-**3h** in  $\text{CDCl}_3$

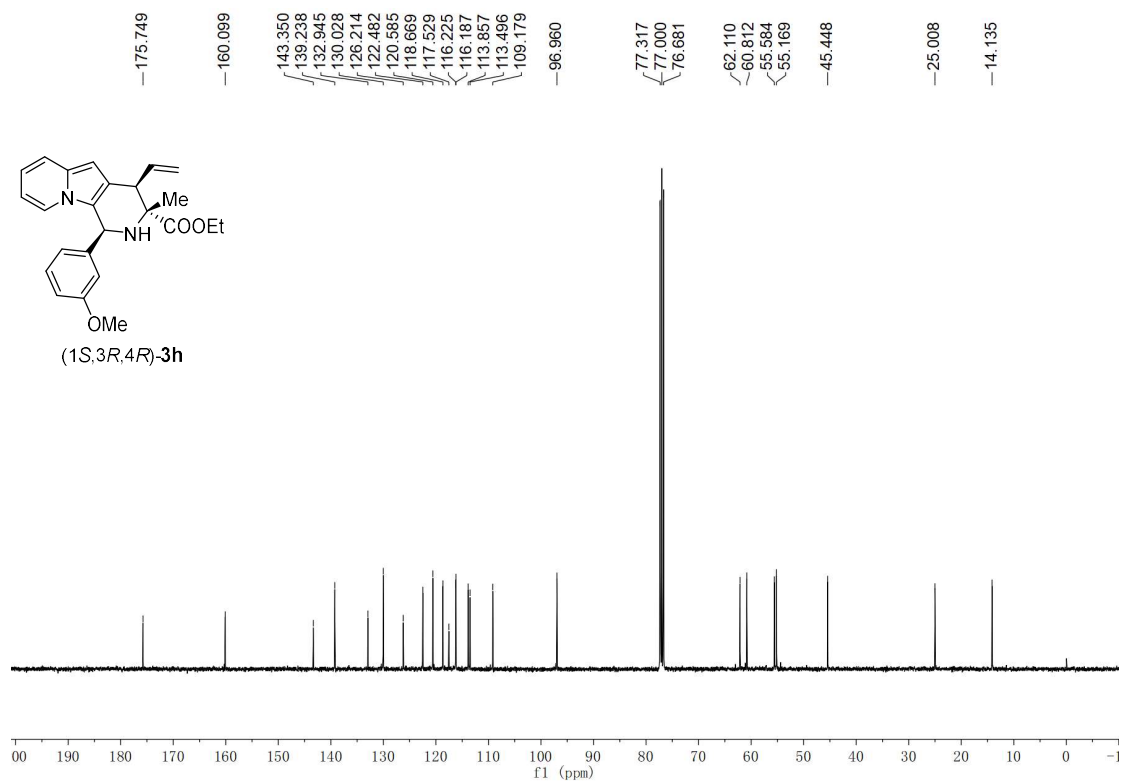

$^{13}\text{C}$  NMR (100 MHz) of (1*S*, 3*R*, 4*R*)-**3h** in  $\text{CDCl}_3$

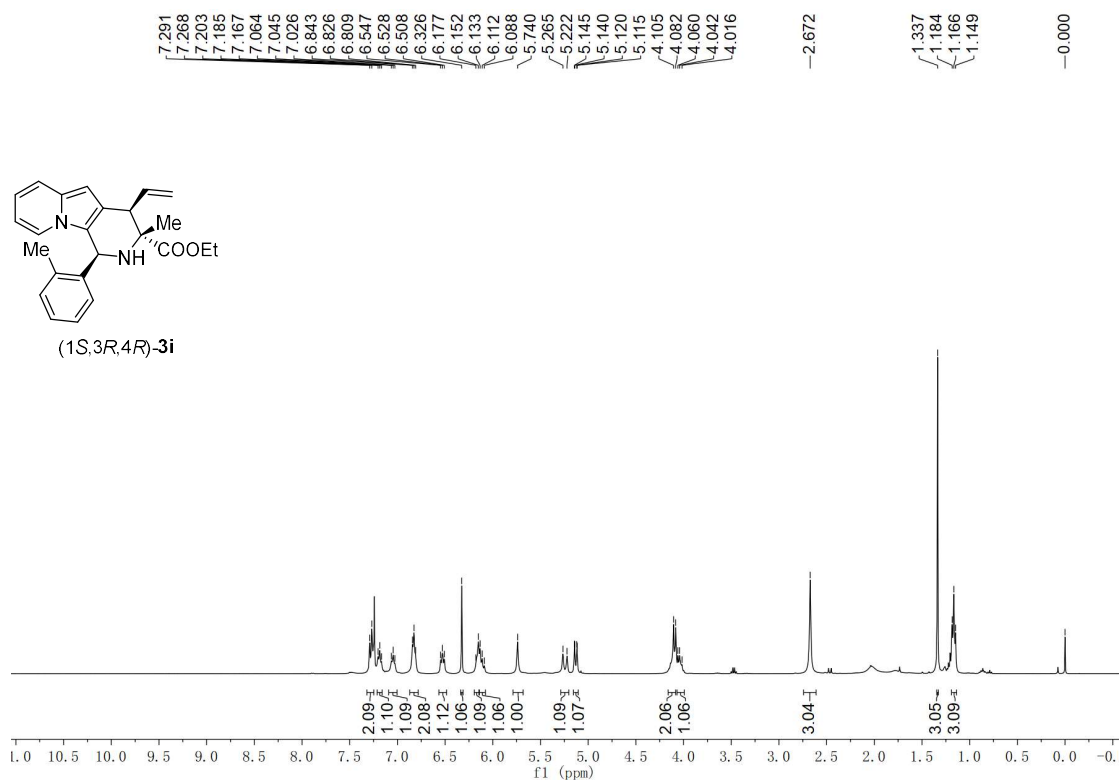

<sup>1</sup>H NMR (400 MHz) of (1*S*, 3*R*, 4*R*)-**3i** in CDCl<sub>3</sub>

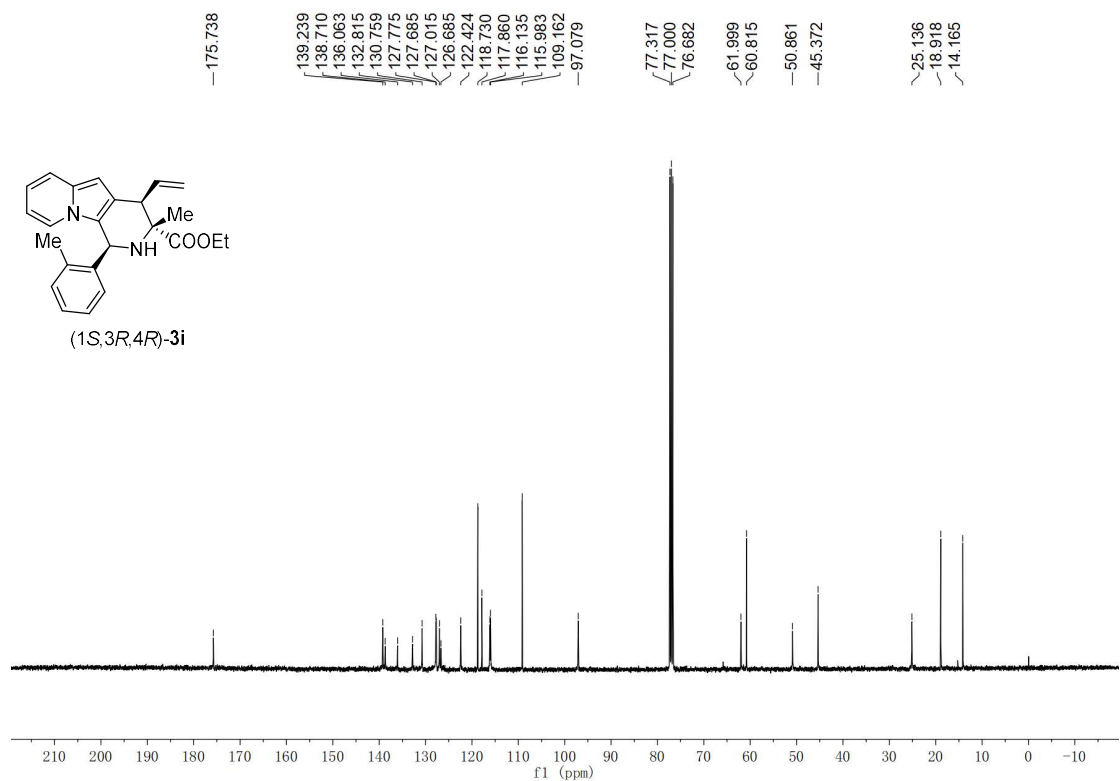

<sup>13</sup>C NMR (100 MHz) of (1*S*, 3*R*, 4*R*)-**3i** in CDCl<sub>3</sub>

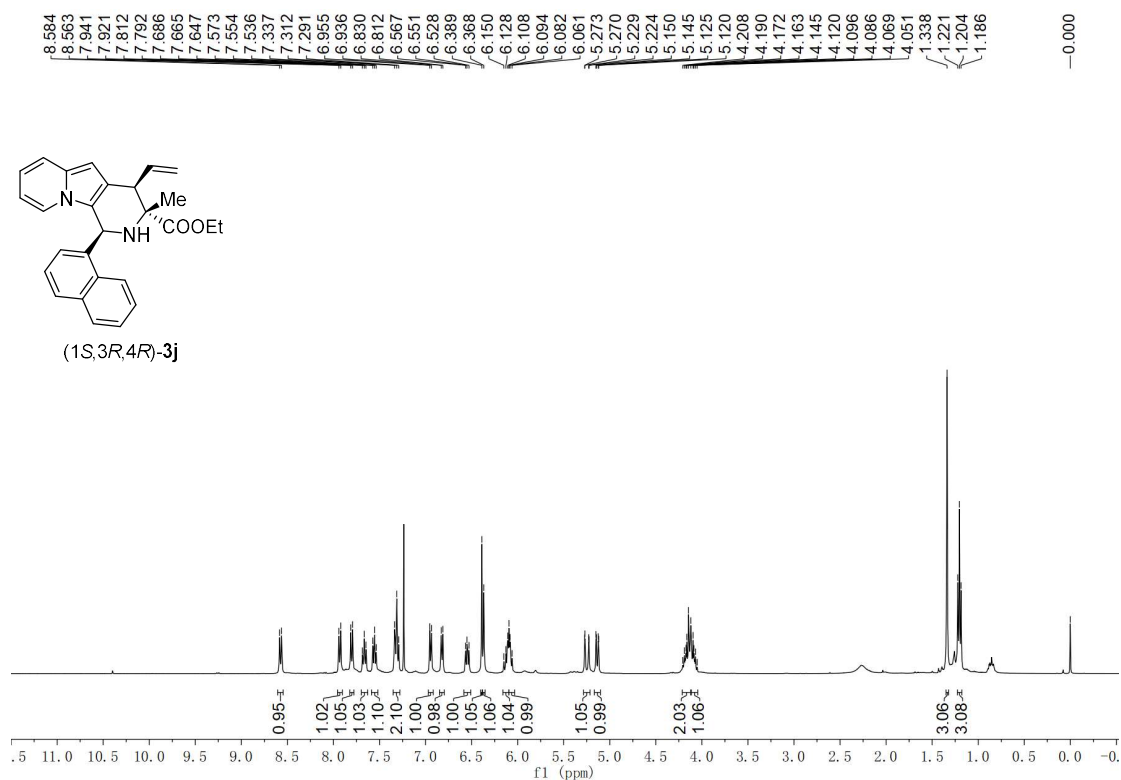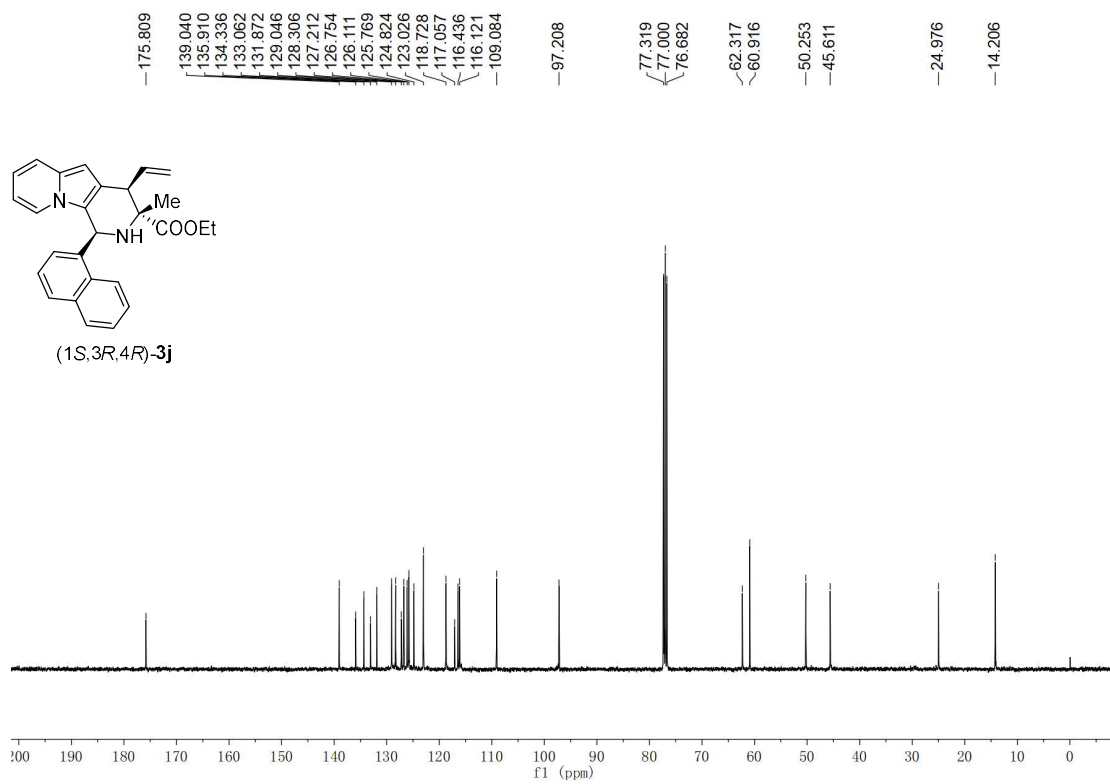

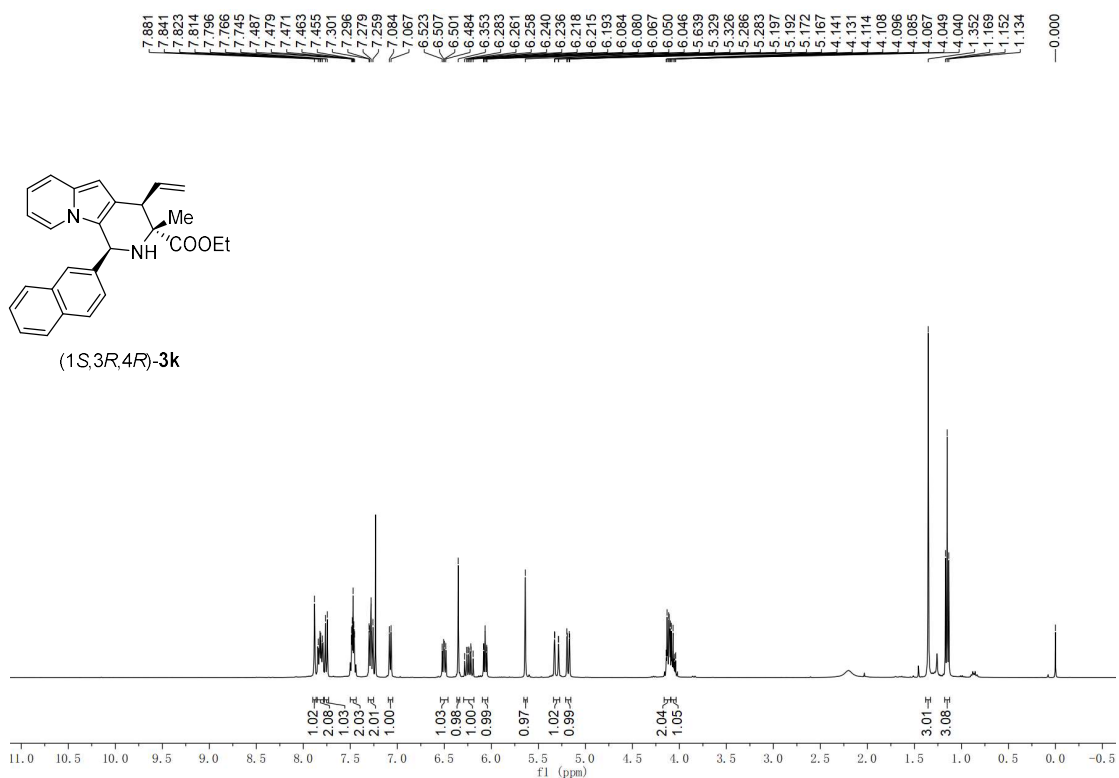

**<sup>1</sup>H NMR (400 MHz) of (1S, 3R, 4R)-3k in CDCl<sub>3</sub>**

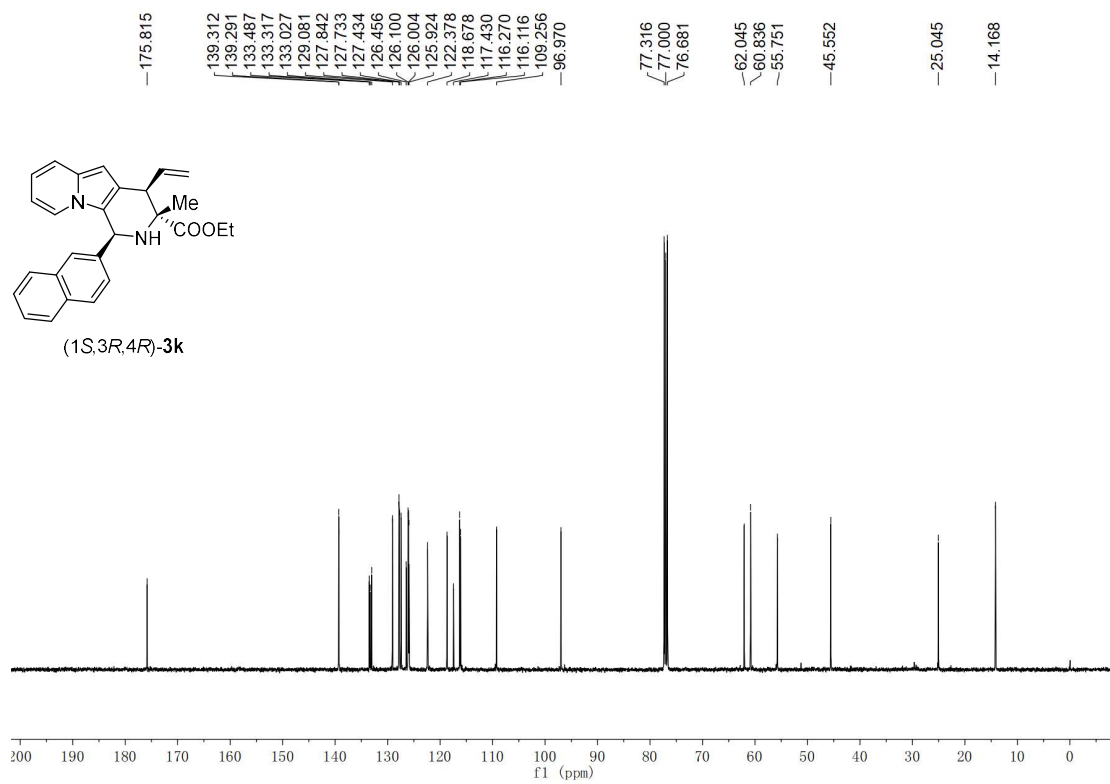

**<sup>13</sup>C NMR (100 MHz) of (1S, 3R, 4R)-3k in CDCl<sub>3</sub>**

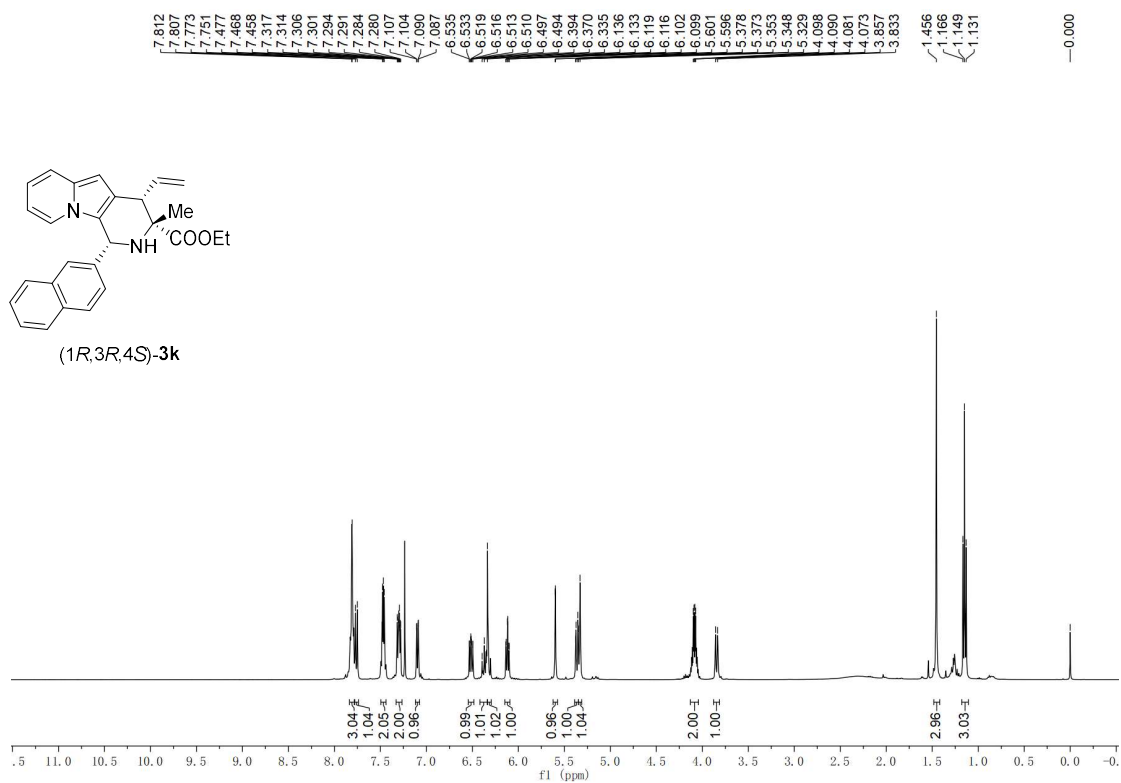

<sup>1</sup>H NMR (400 MHz) of (1R, 3R, 4S)-3k in CDCl<sub>3</sub>

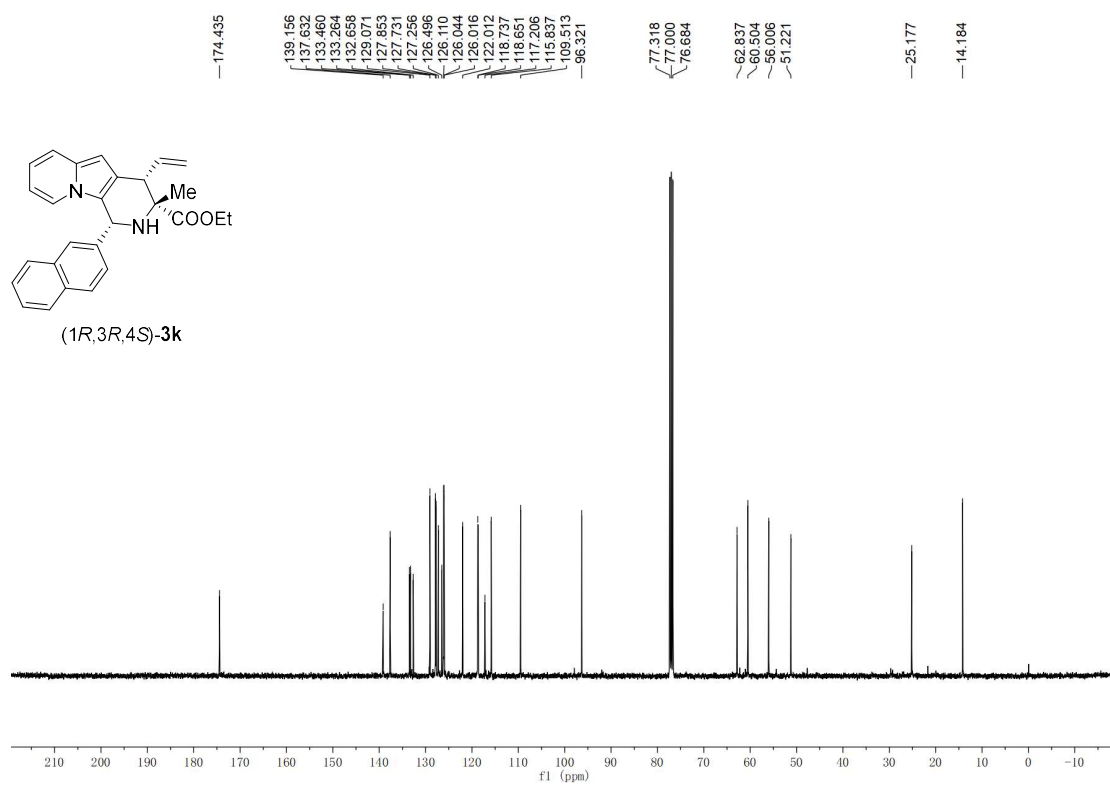

<sup>13</sup>C NMR (100 MHz) of (1R, 3R, 4S)-3k in CDCl<sub>3</sub>

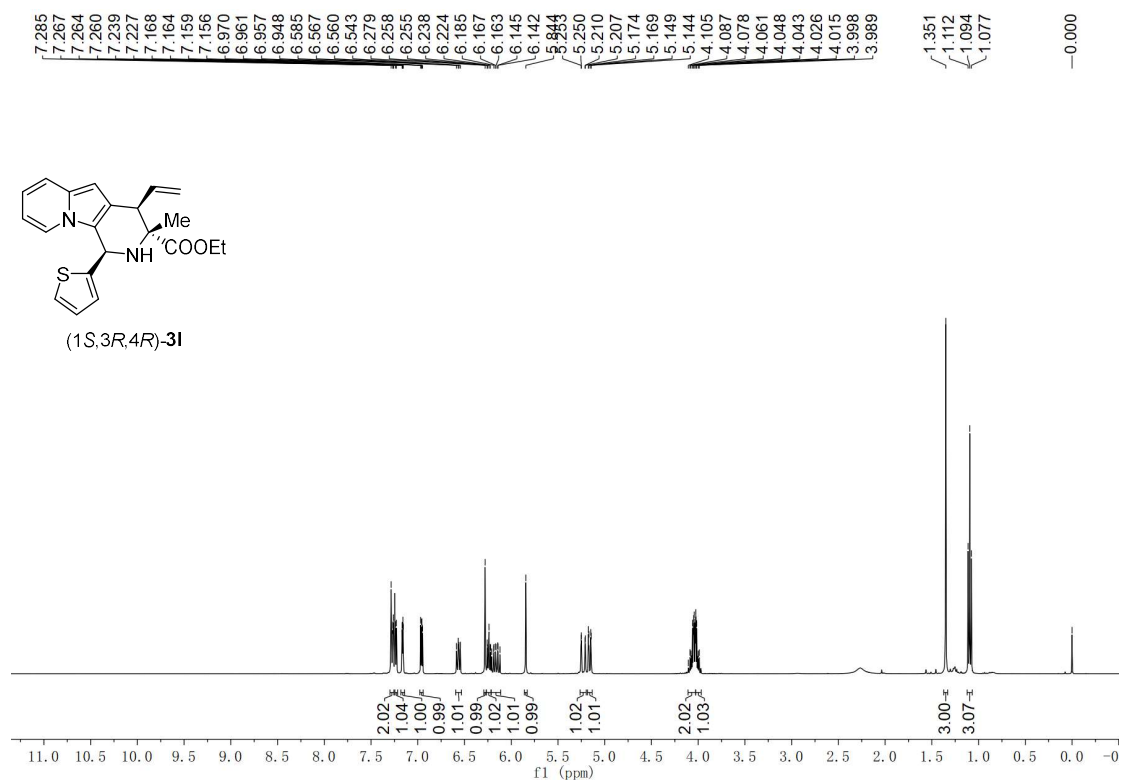

$^1\text{H}$  NMR (400 MHz) of (1*S*, 3*R*, 4*R*)-**3I** in  $\text{CDCl}_3$

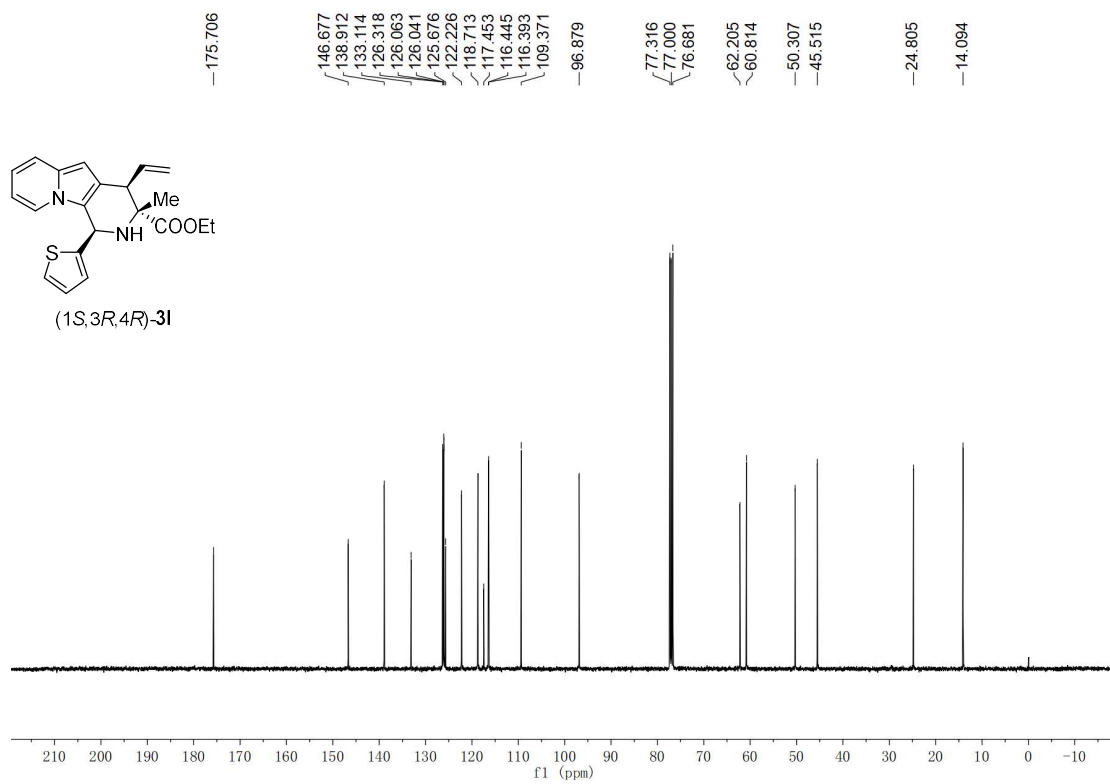

$^{13}\text{C}$  NMR (100 MHz) of (1*S*, 3*R*, 4*R*)-**3I** in  $\text{CDCl}_3$



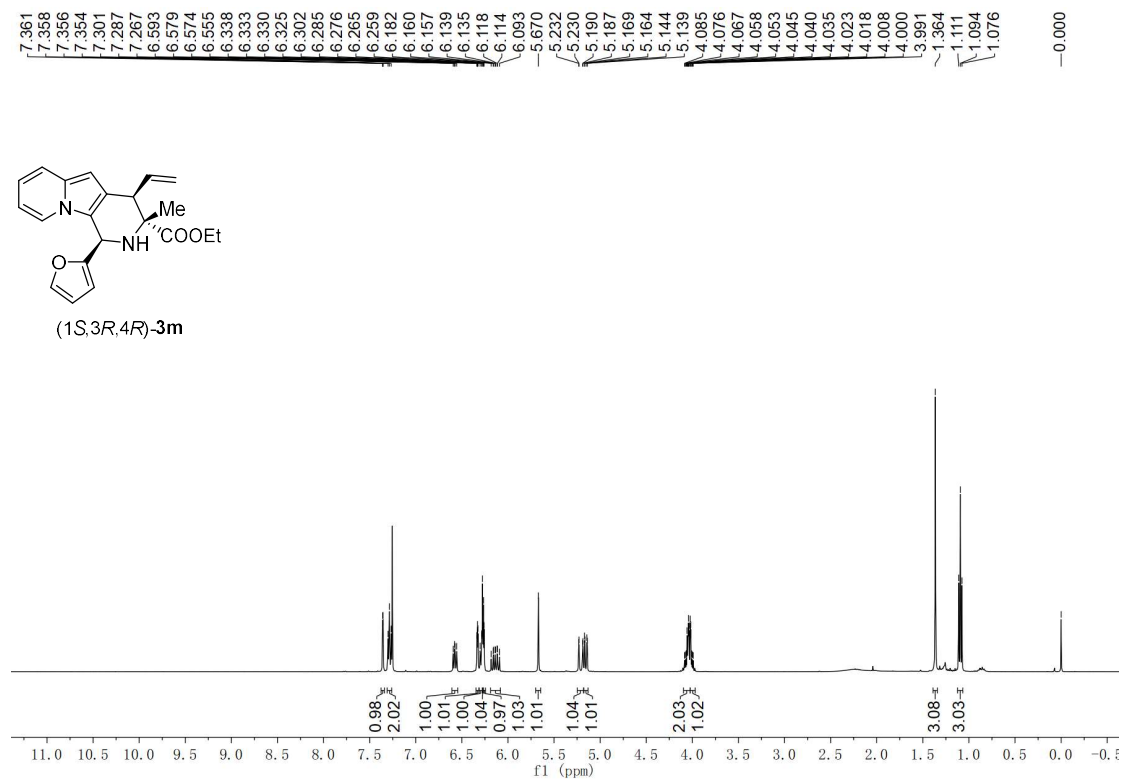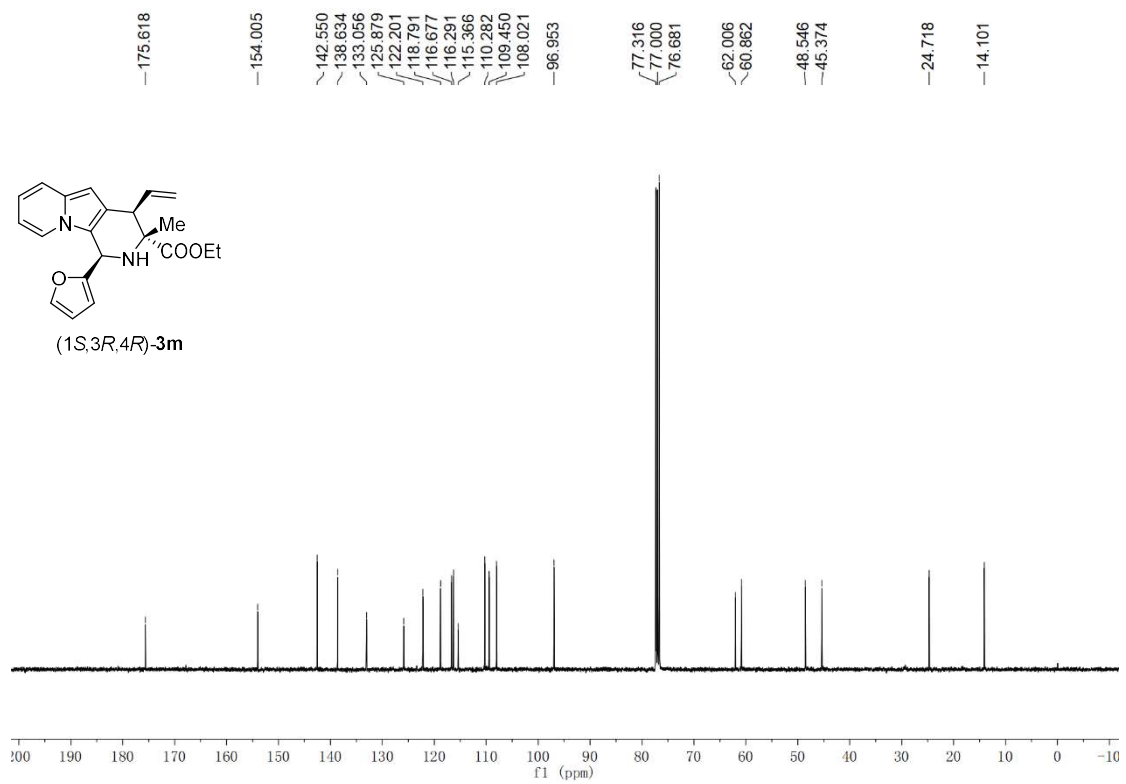

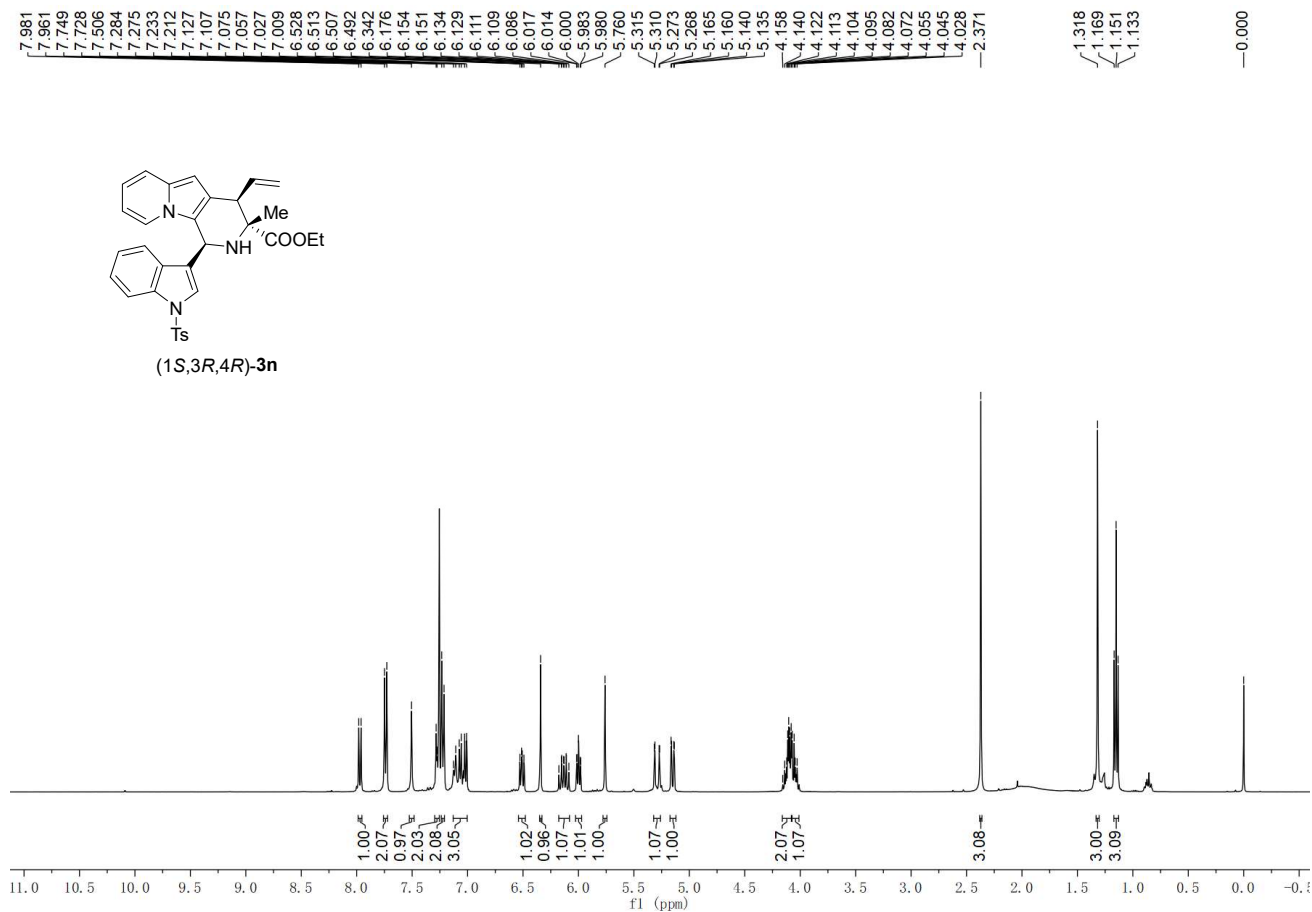

$^1\text{H}$  NMR (400 MHz) of (1*S*, 3*R*, 4*R*)-**3n** in  $\text{CDCl}_3$

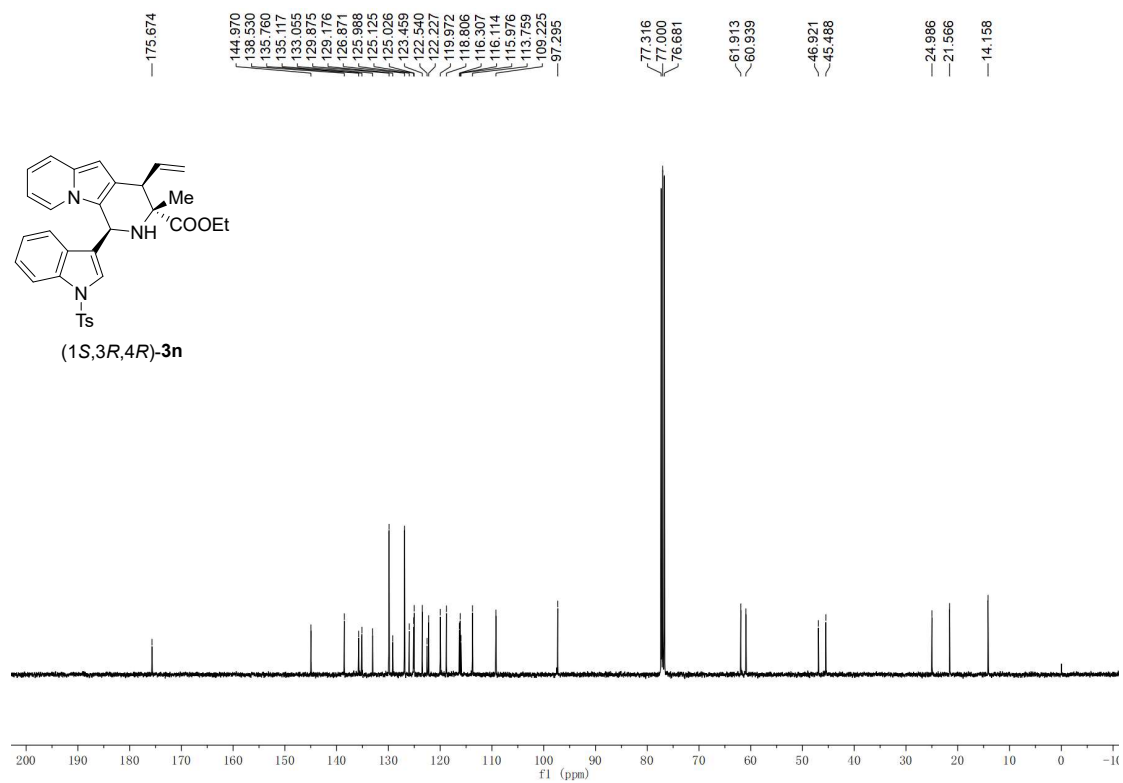

$^{13}\text{C}$  NMR (100 MHz) of (1*S*, 3*R*, 4*R*)-**3n** in  $\text{CDCl}_3$

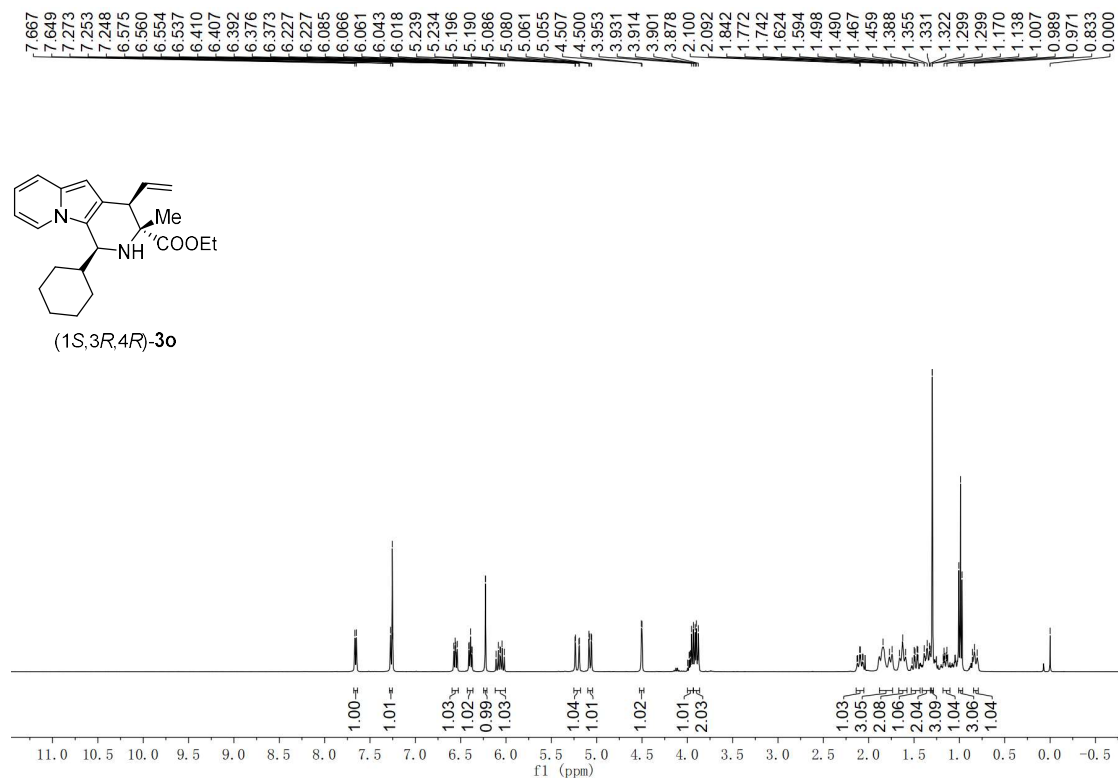

$^1\text{H}$  NMR (400 MHz) of (1*S*, 3*R*, 4*R*)-**3o** in  $\text{CDCl}_3$

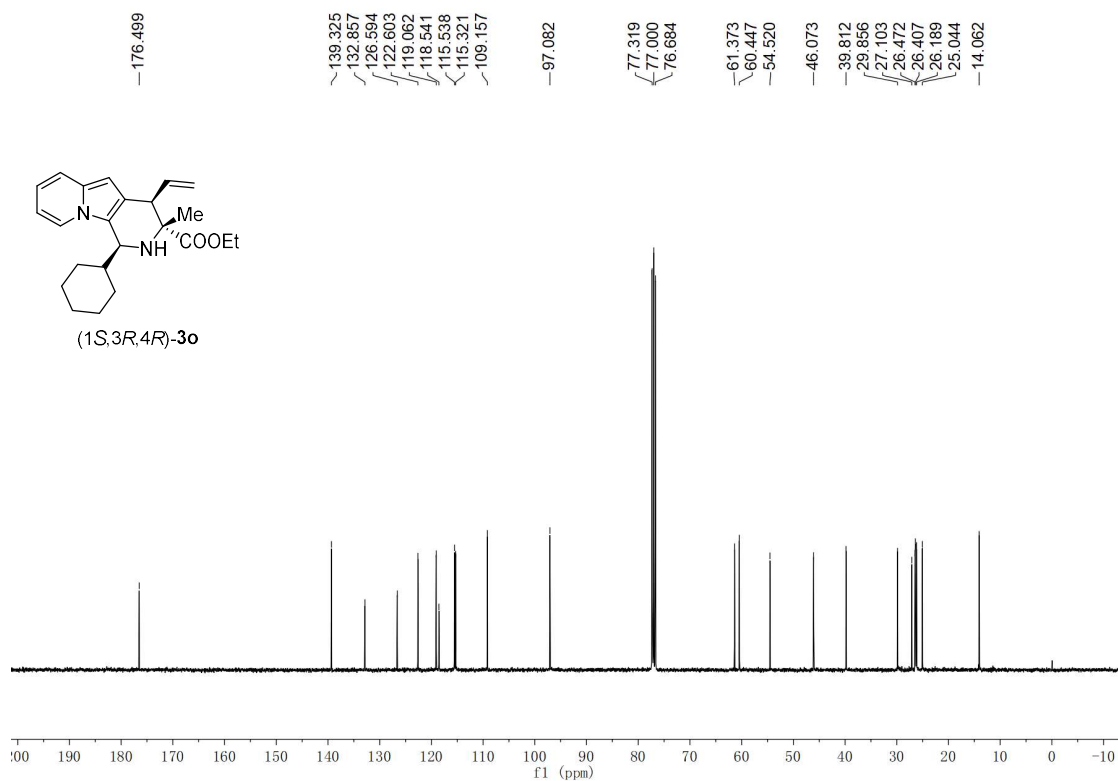

$^{13}\text{C}$  NMR (100 MHz) of (1*S*, 3*R*, 4*R*)-**3o** in  $\text{CDCl}_3$

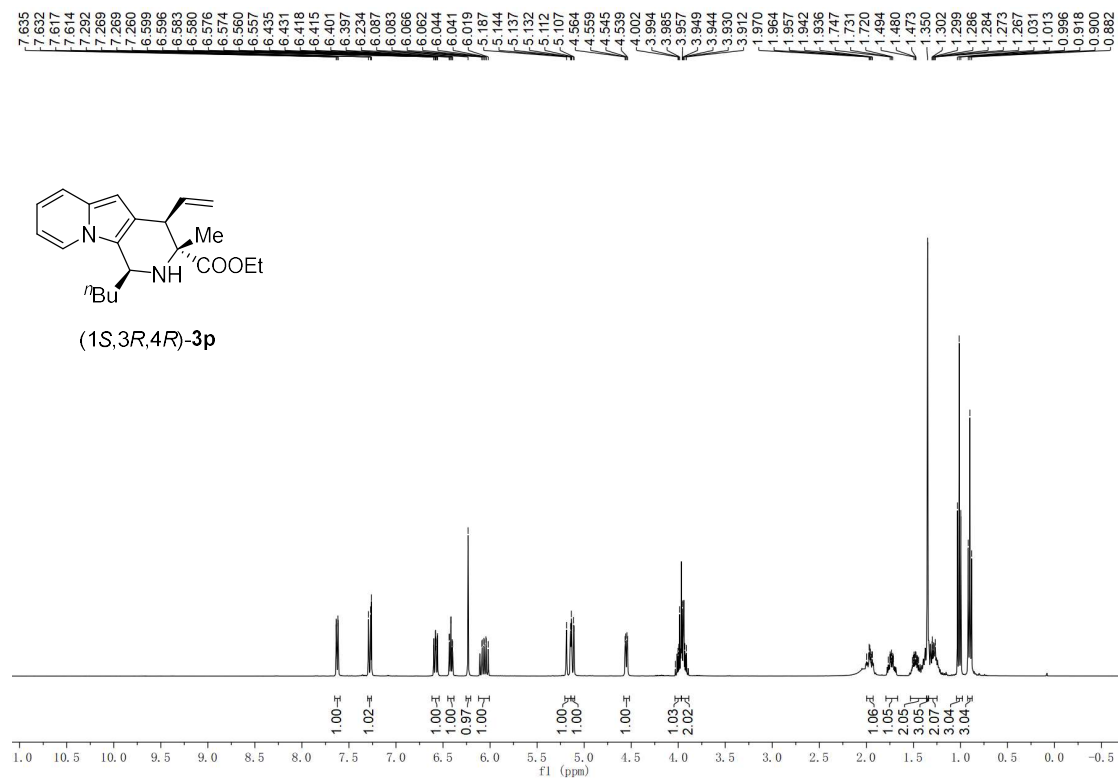

$^1\text{H}$  NMR (400 MHz) of (1*S*, 3*R*, 4*R*)-**3p** in  $\text{CDCl}_3$

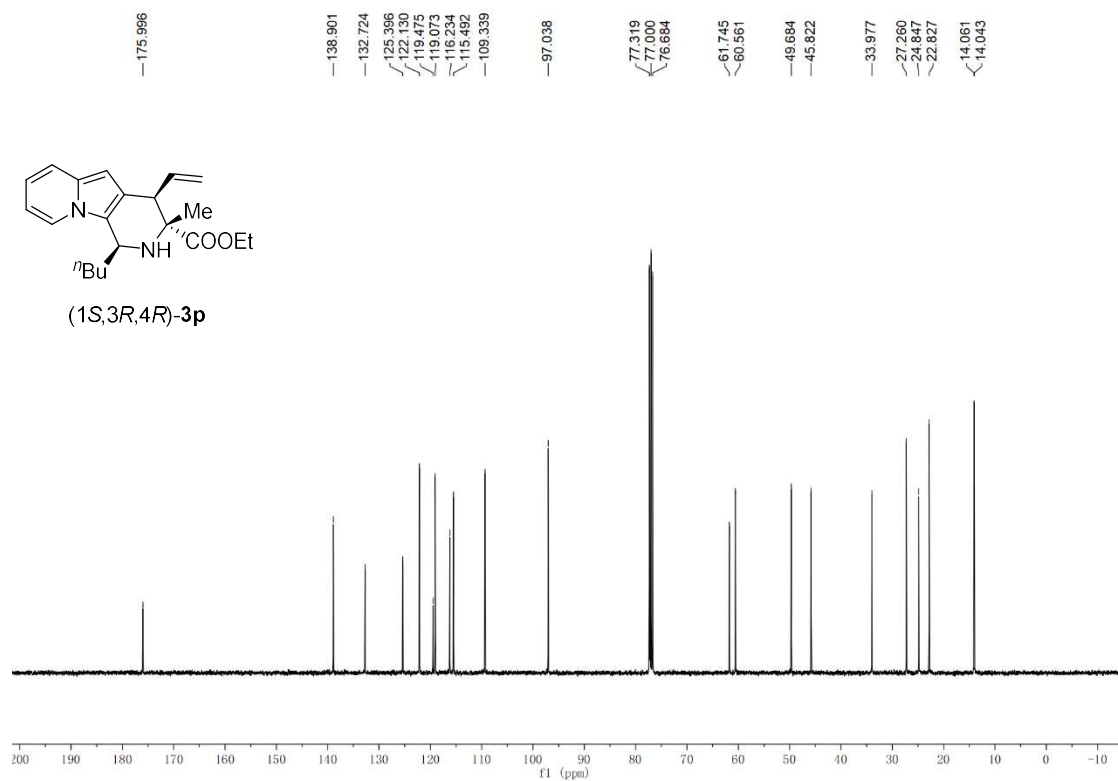

$^{13}\text{C}$  NMR (100 MHz) of (1*S*, 3*R*, 4*R*)-**3p** in  $\text{CDCl}_3$

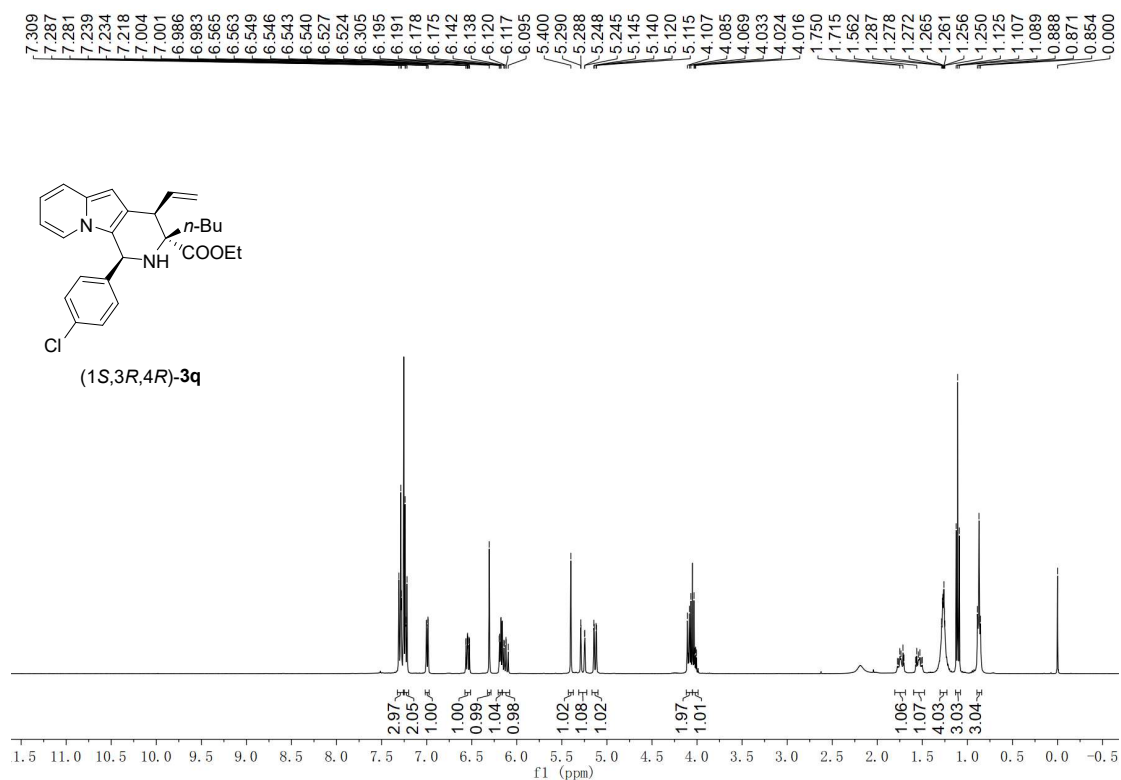

$^1\text{H}$  NMR (400 MHz) of (1*S*, 3*R*, 4*R*)-**3q** in  $\text{CDCl}_3$

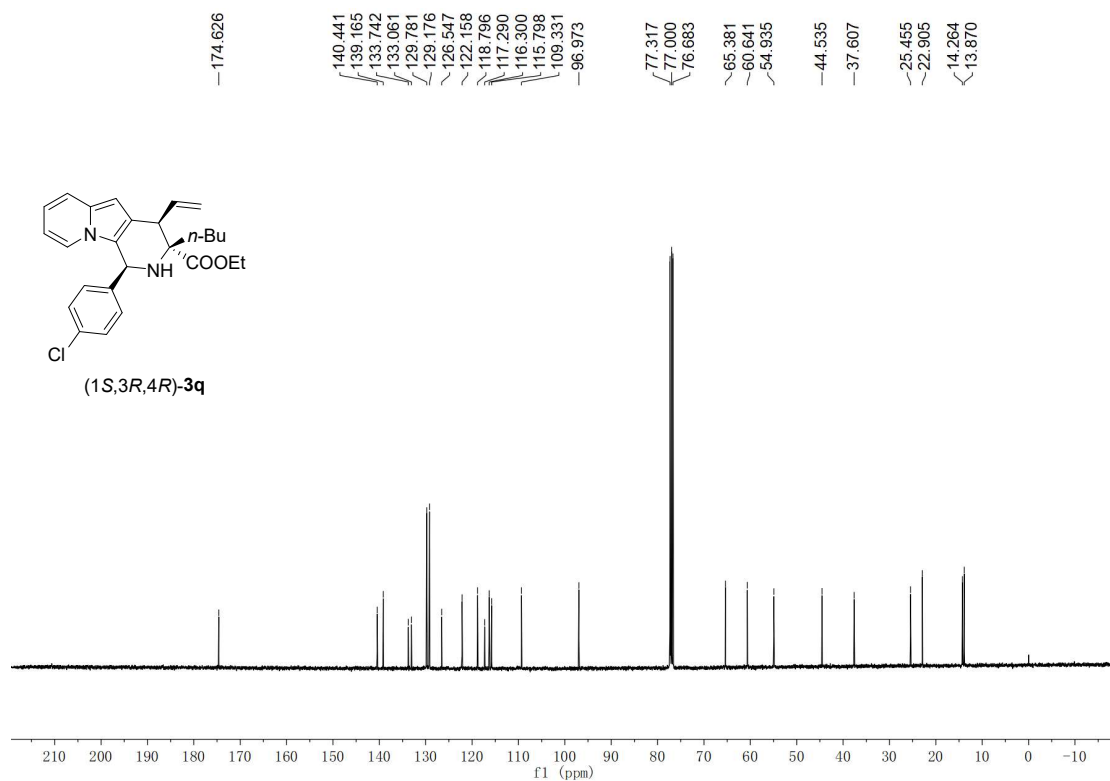

$^{13}\text{C}$  NMR (100 MHz) of (1*S*, 3*R*, 4*R*)-**3q** in  $\text{CDCl}_3$

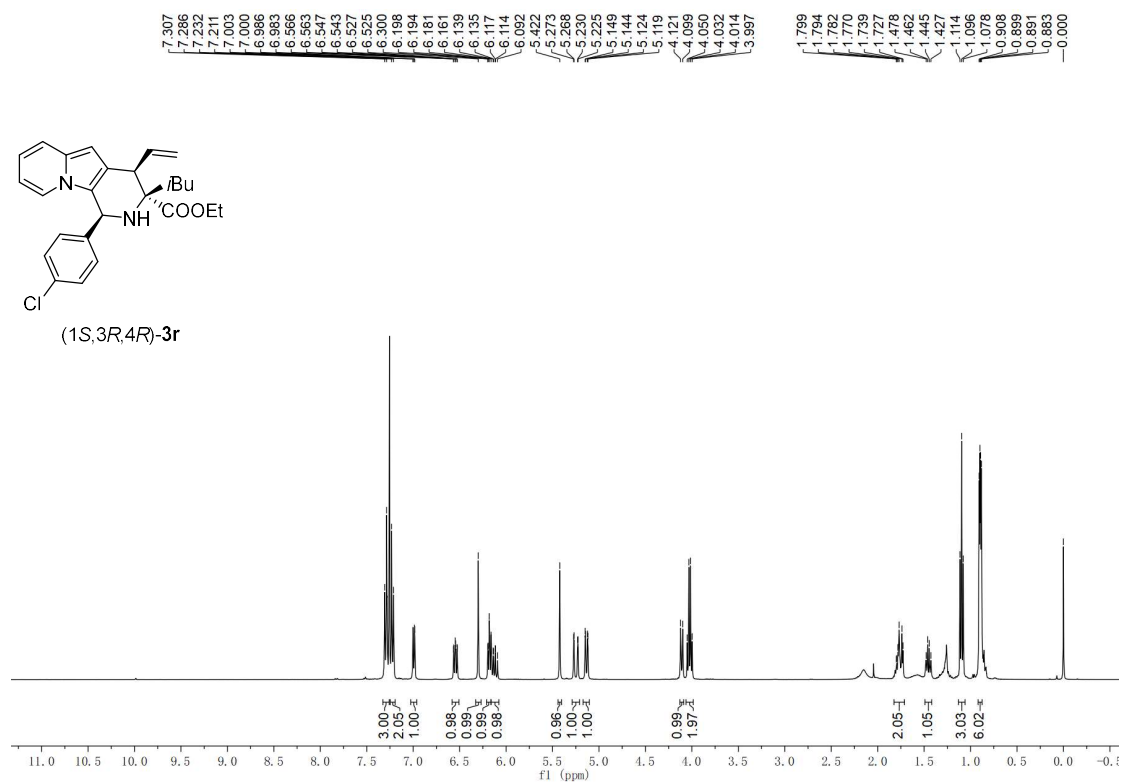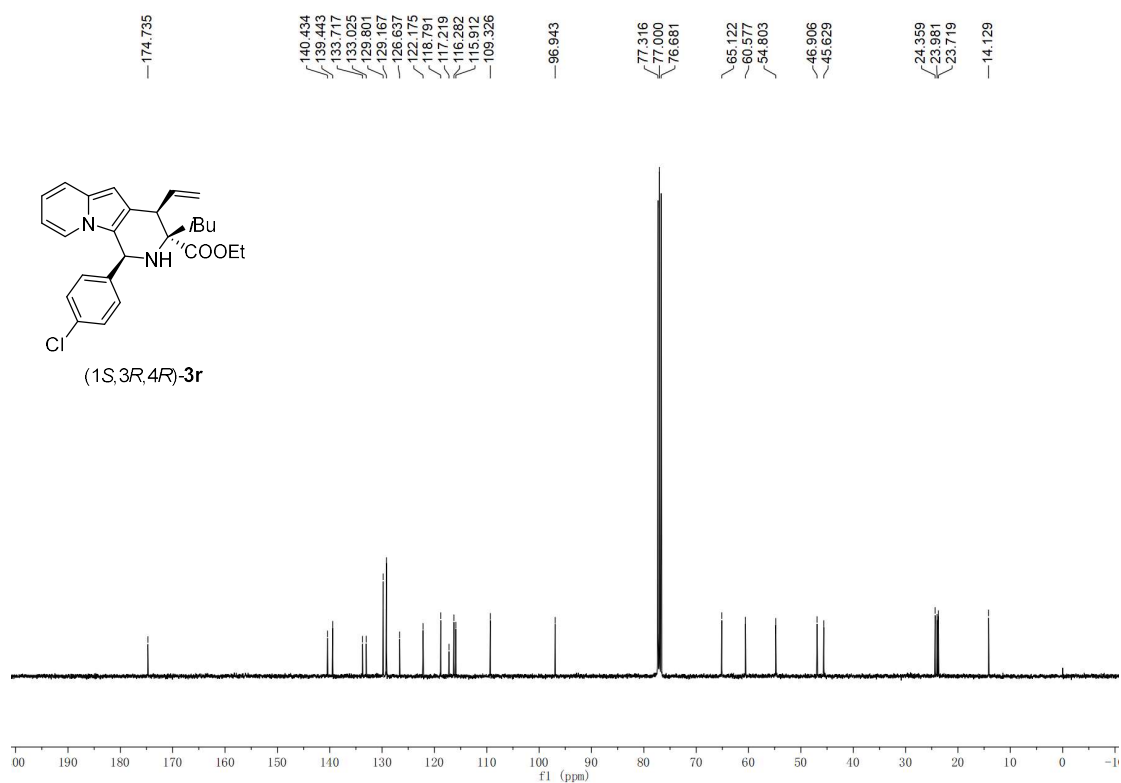

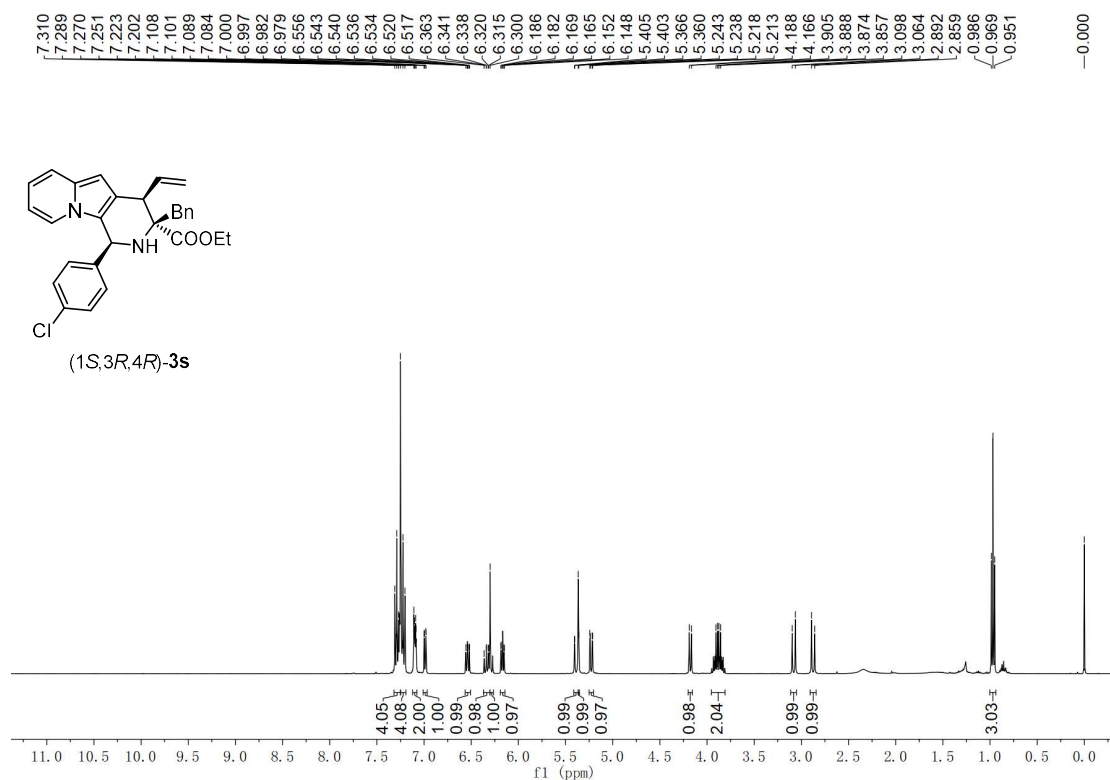

<sup>1</sup>H NMR (400 MHz) of (1*S*, 3*R*, 4*R*)-**3s** in CDCl<sub>3</sub>

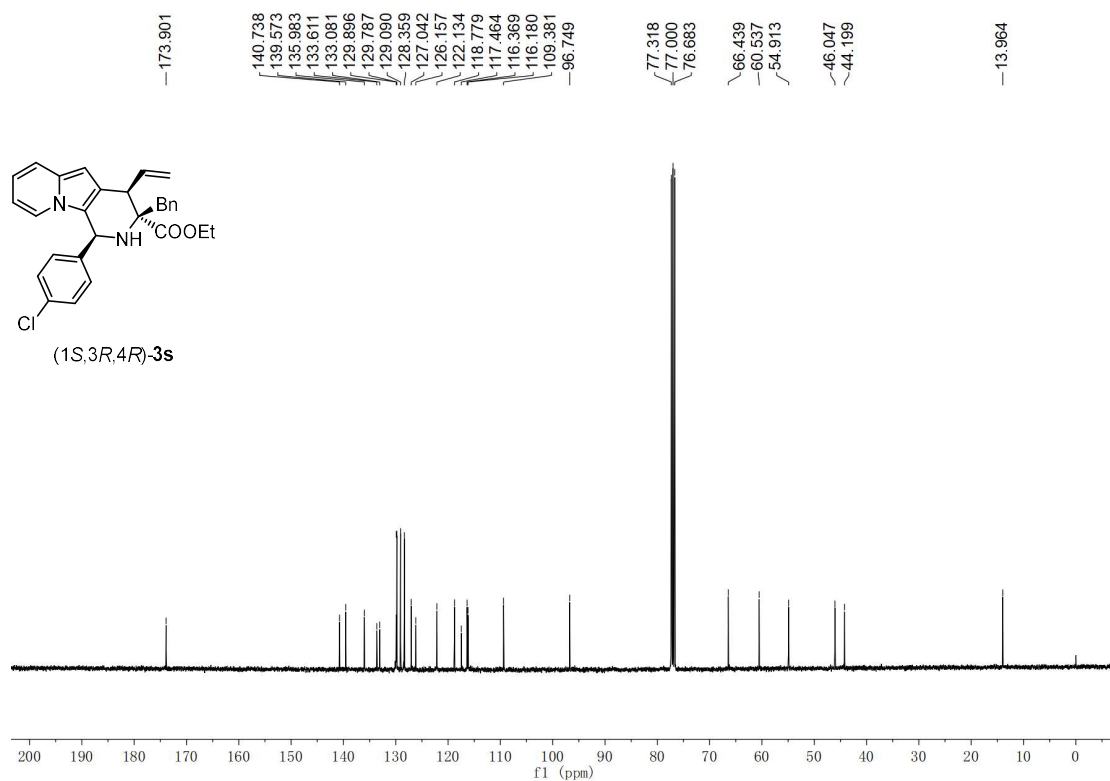

<sup>13</sup>C NMR (100 MHz) of (1*S*, 3*R*, 4*R*)-**3s** in CDCl<sub>3</sub>

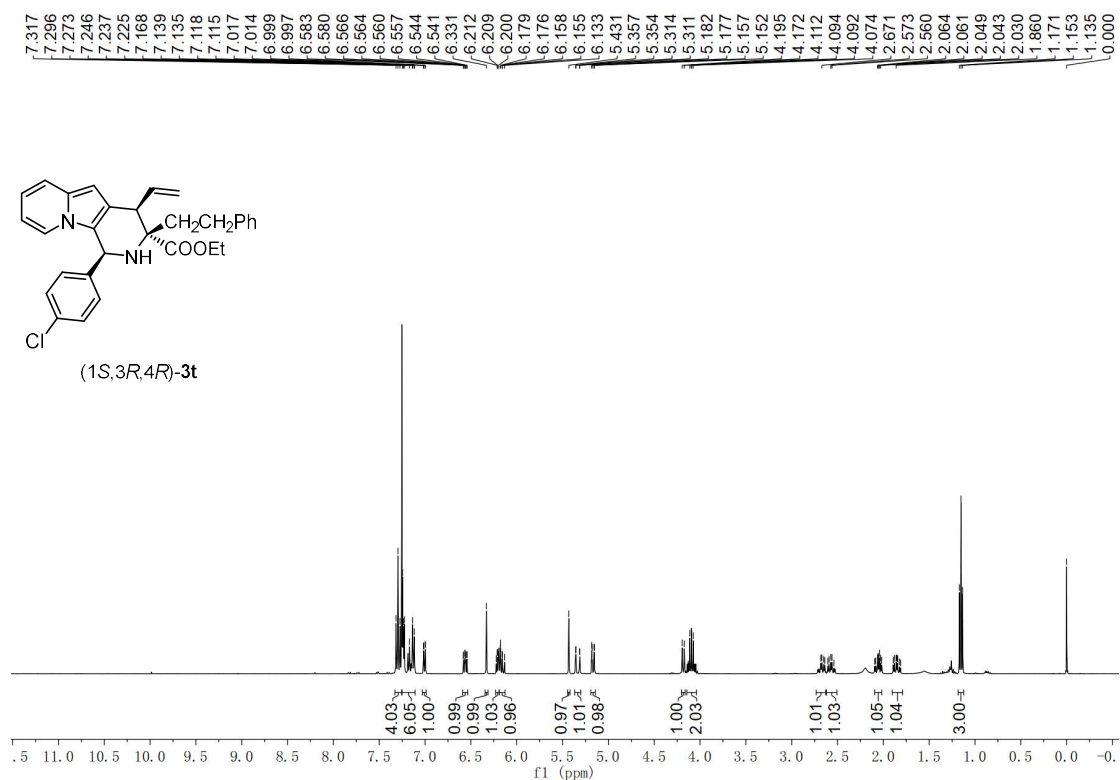

$^1\text{H}$  NMR (400 MHz) of (1*S*, 3*R*, 4*R*)-**3t** in  $\text{CDCl}_3$

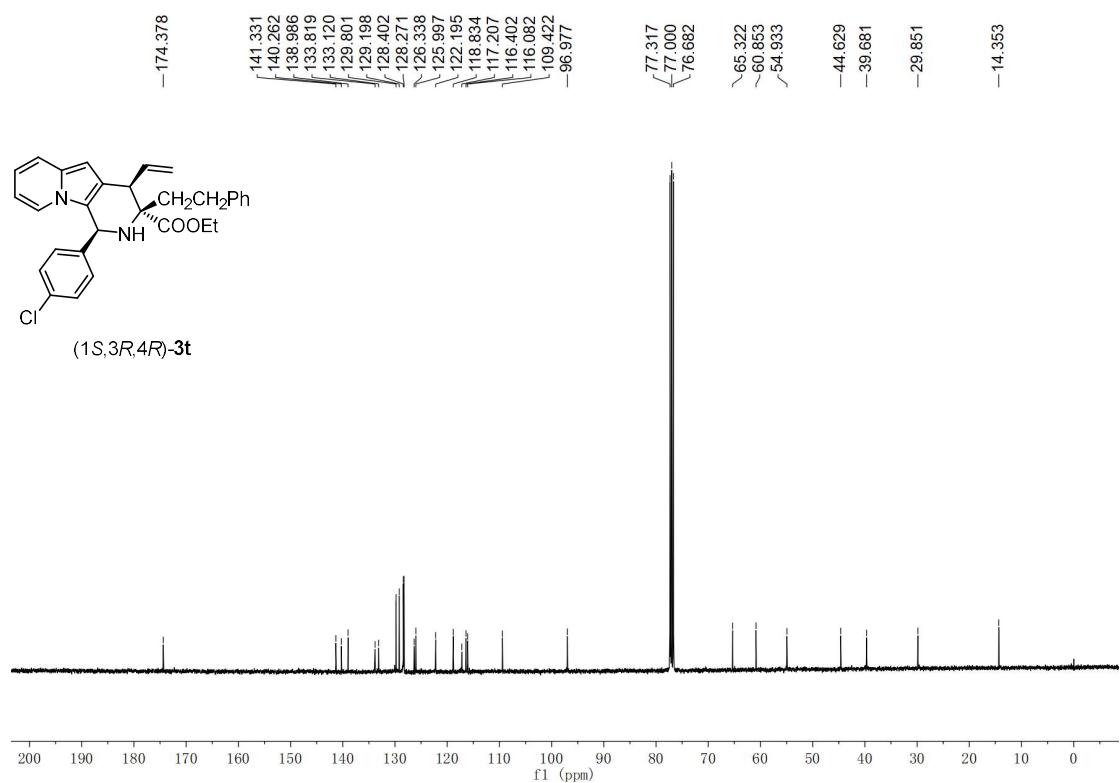

$^{13}\text{C}$  NMR (100 MHz) of (1*S*, 3*R*, 4*R*)-**3t** in  $\text{CDCl}_3$



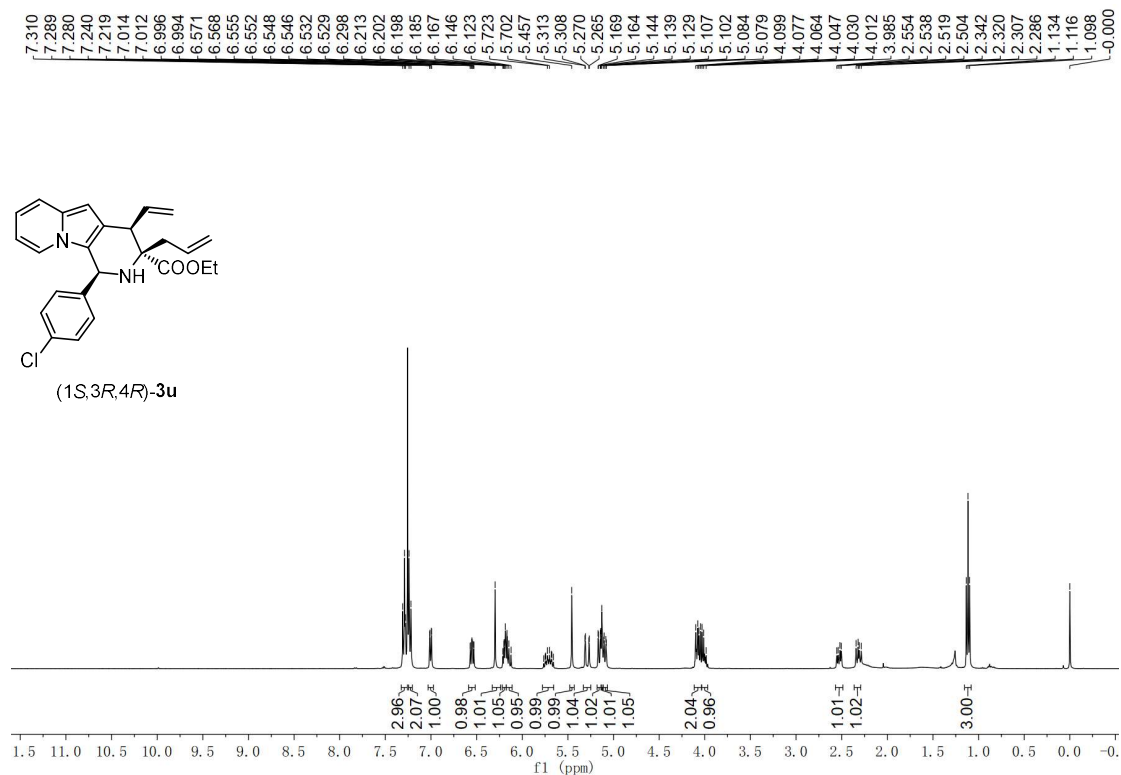

**<sup>1</sup>H NMR (400 MHz) of (1*S*, 3*R*, 4*R*)-**3u** in CDCl<sub>3</sub>**

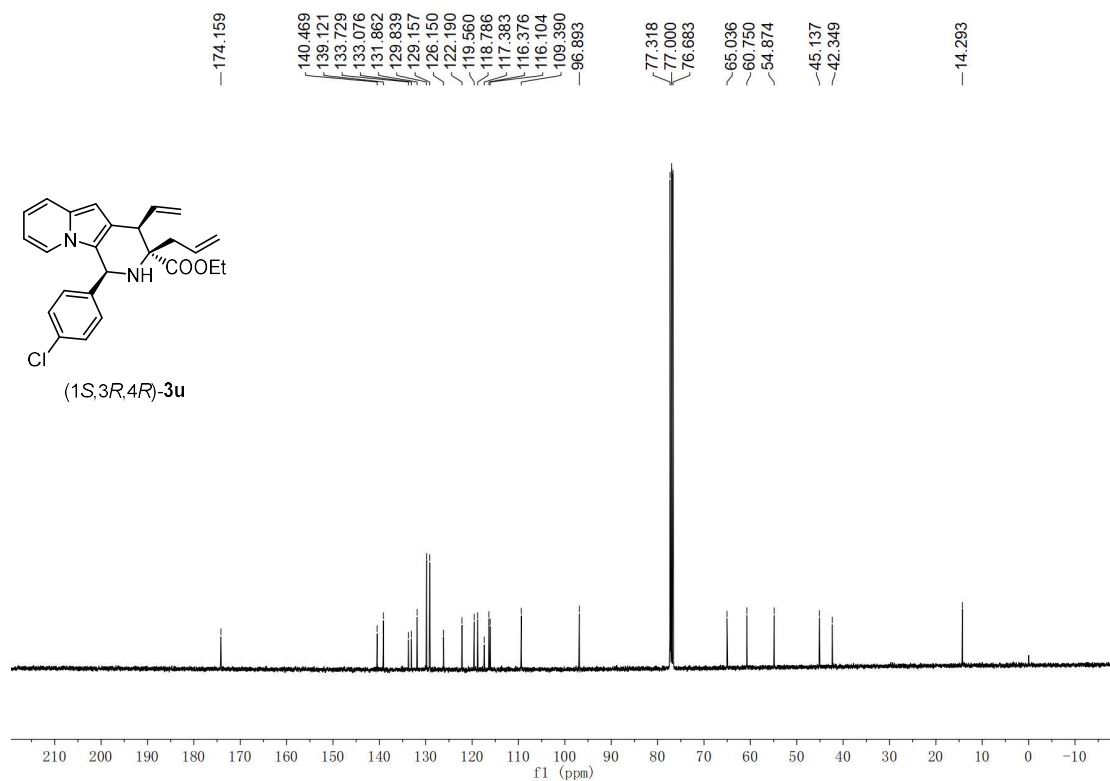

**<sup>13</sup>C NMR (100 MHz) of (1*S*, 3*R*, 4*R*)-**3u** in CDCl<sub>3</sub>**

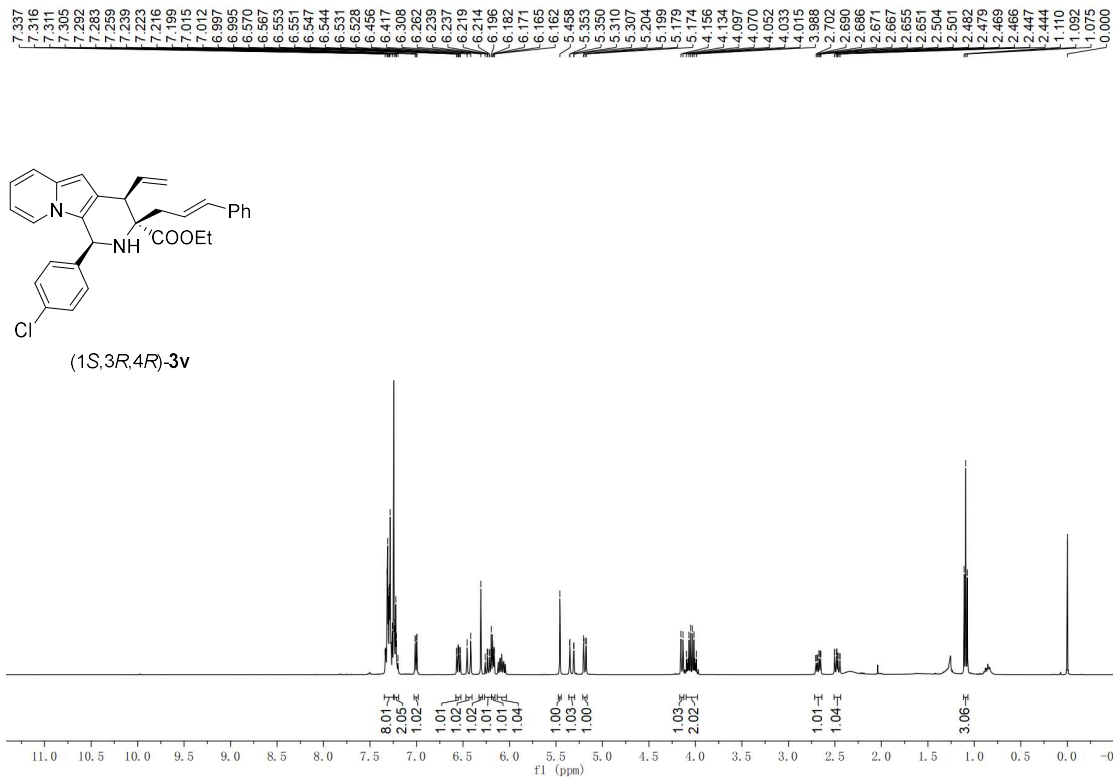

$^1\text{H}$  NMR (400 MHz) of (1*S*, 3*R*, 4*R*)-**3v** in  $\text{CDCl}_3$

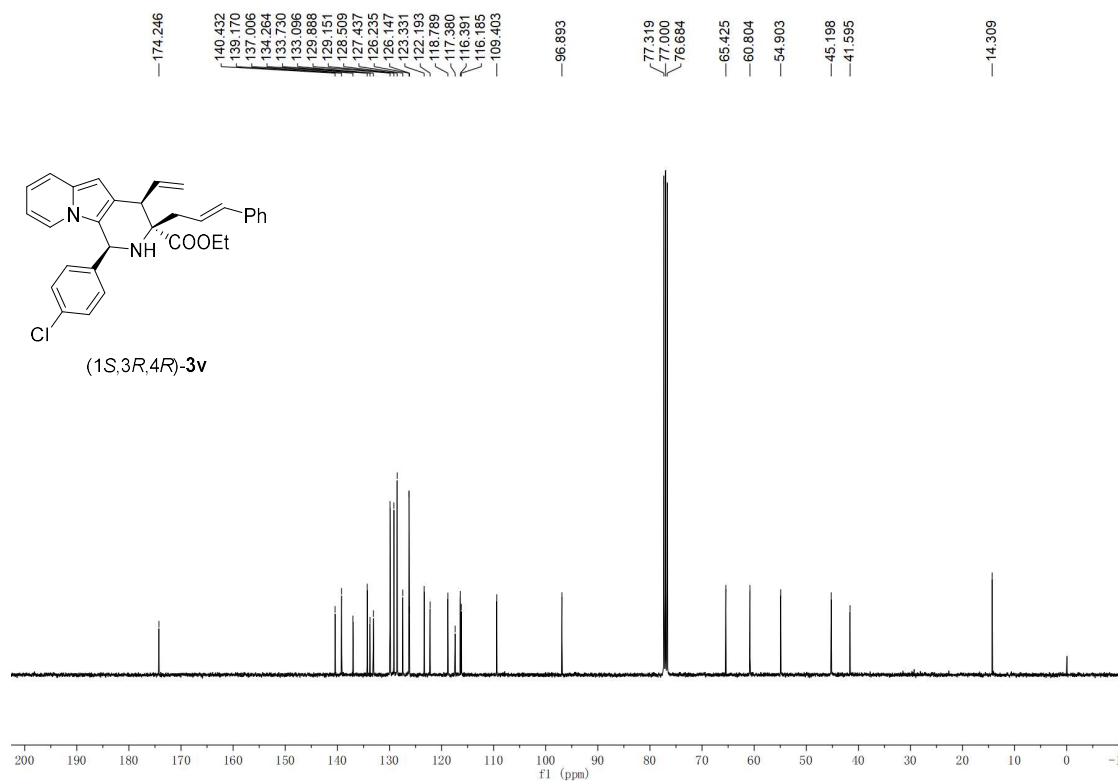

$^{13}\text{C}$  NMR (100 MHz) of (1*S*, 3*R*, 4*R*)-**3v** in  $\text{CDCl}_3$

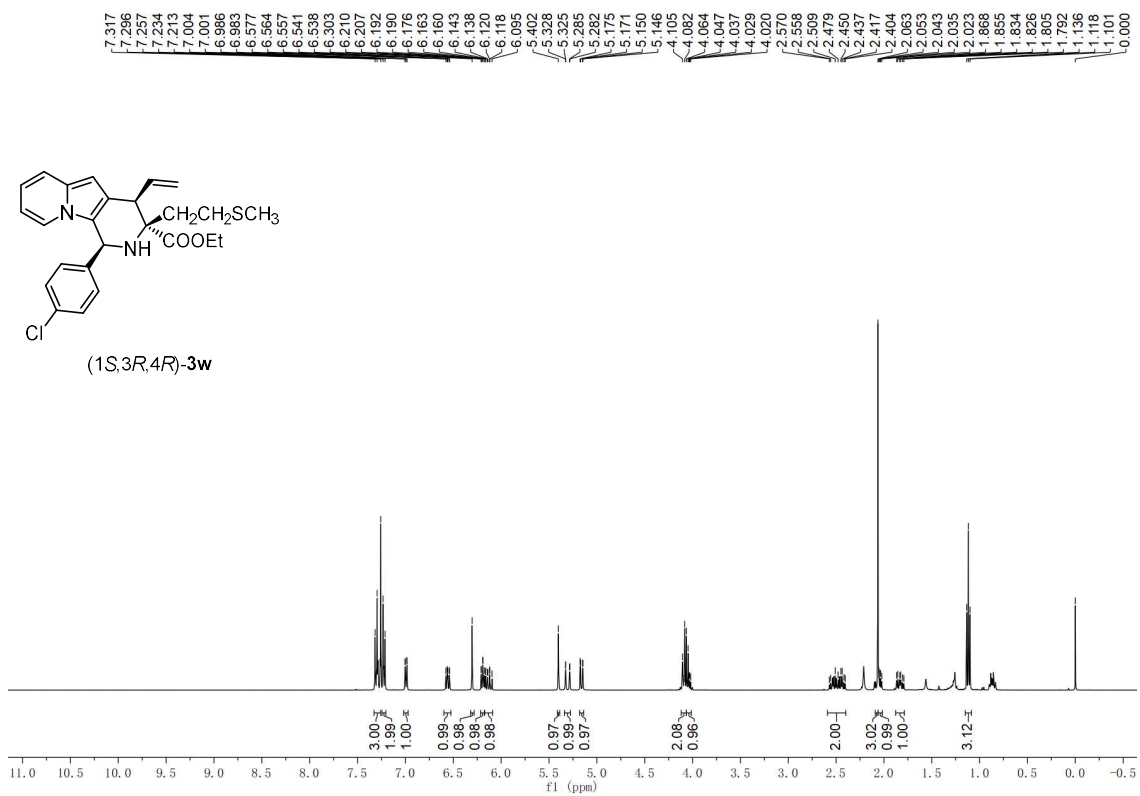

$^1\text{H}$  NMR (400 MHz) of (1*S*, 3*R*, 4*R*)-**3w** in  $\text{CDCl}_3$

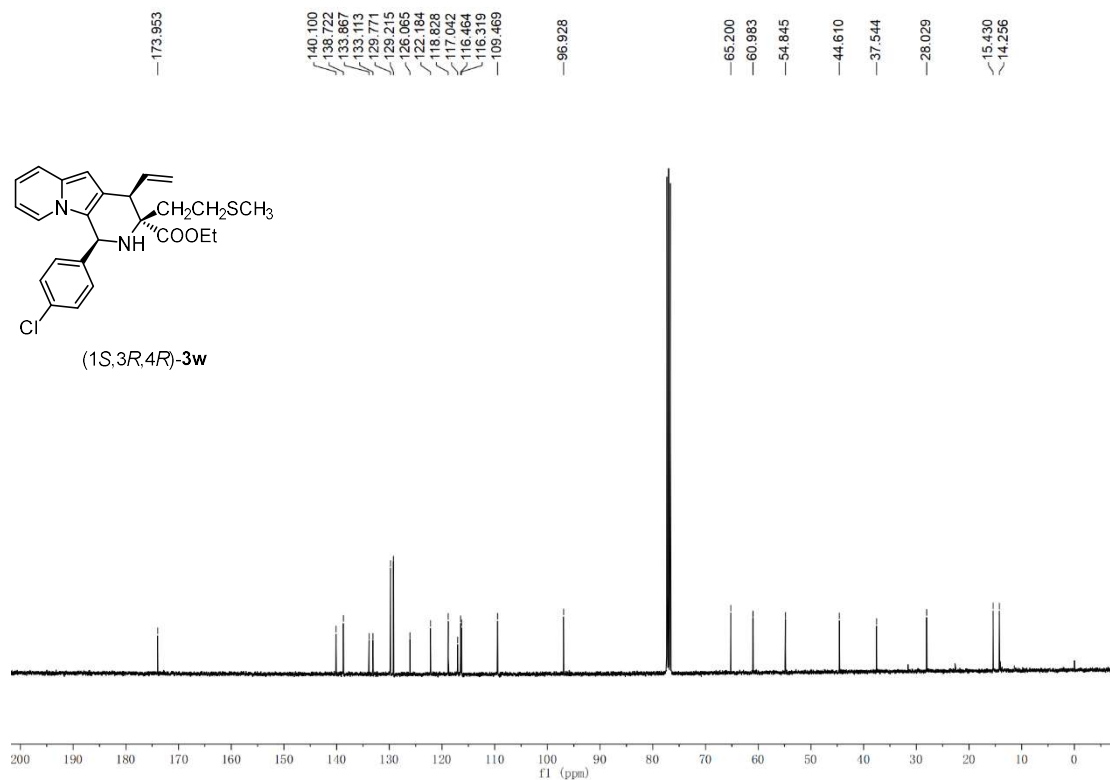

$^{13}\text{C}$  NMR (100 MHz) of (1*S*, 3*R*, 4*R*)-**3w** in  $\text{CDCl}_3$

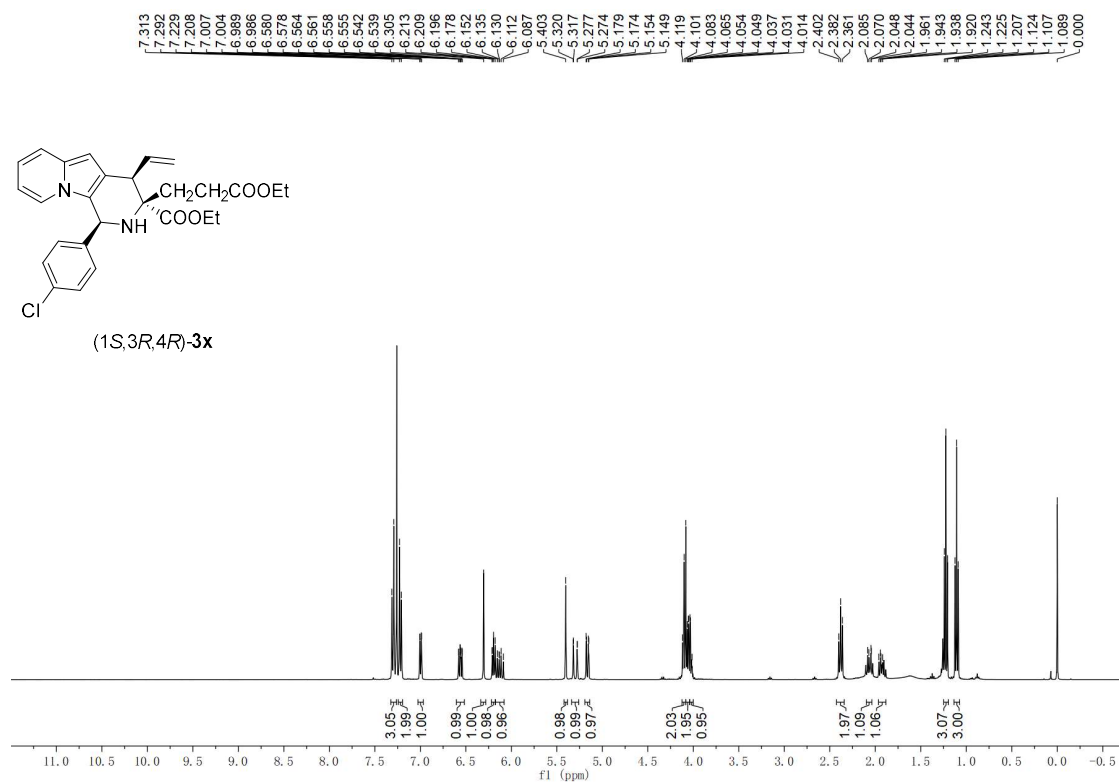

$^1\text{H}$  NMR (400 MHz) of (1*S*, 3*R*, 4*R*)-**3x** in  $\text{CDCl}_3$

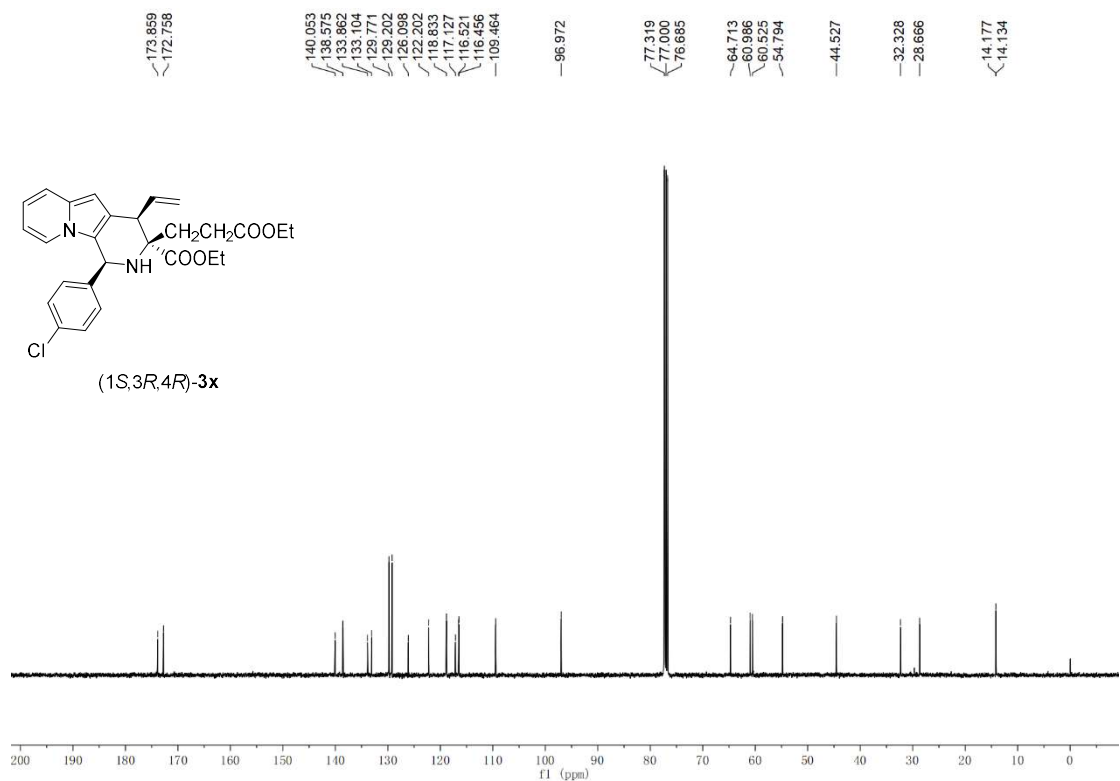

$^{13}\text{C}$  NMR (100 MHz) of (1*S*, 3*R*, 4*R*)-**3x** in  $\text{CDCl}_3$

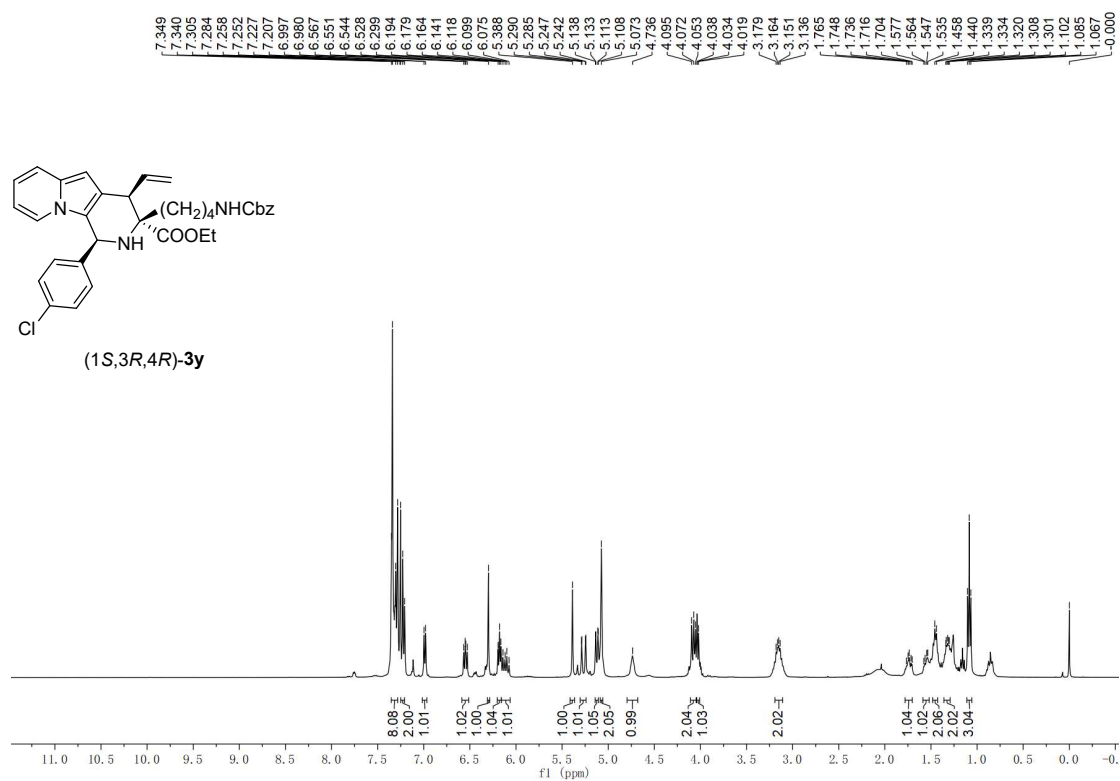

<sup>1</sup>H NMR (400 MHz) of (1S, 3R, 4R)-**3y** in CDCl<sub>3</sub>

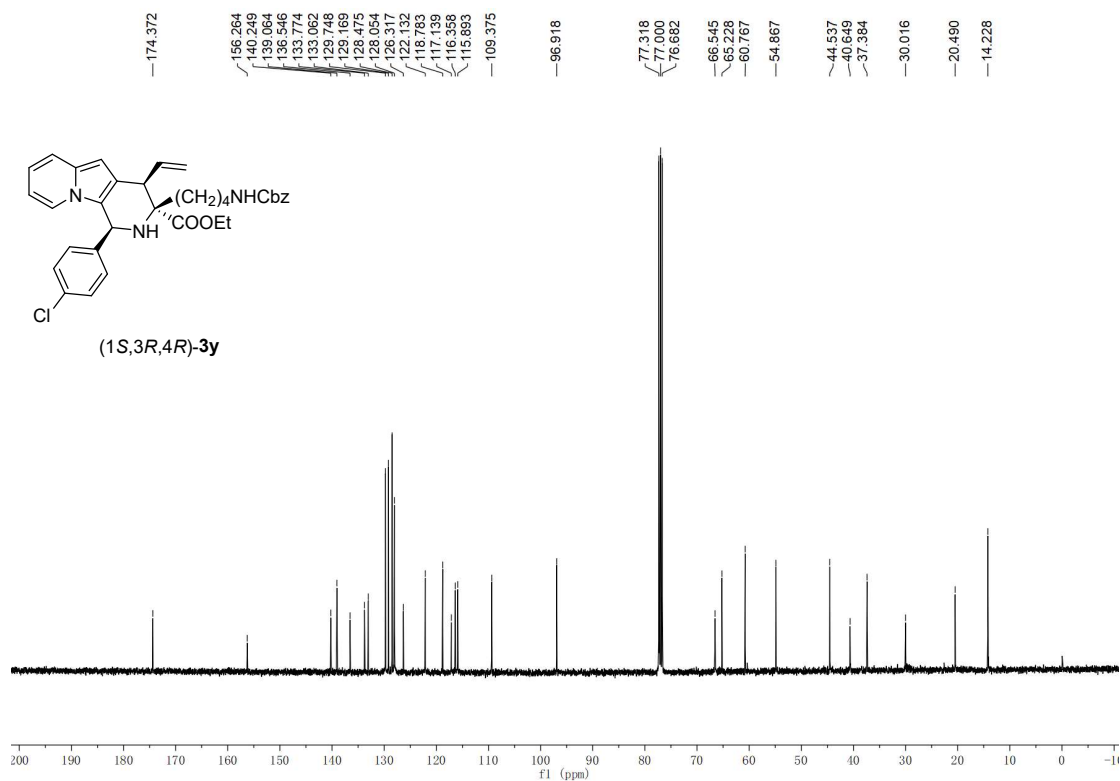

<sup>13</sup>C NMR (100 MHz) of (1S, 3R, 4R)-**3y** in CDCl<sub>3</sub>

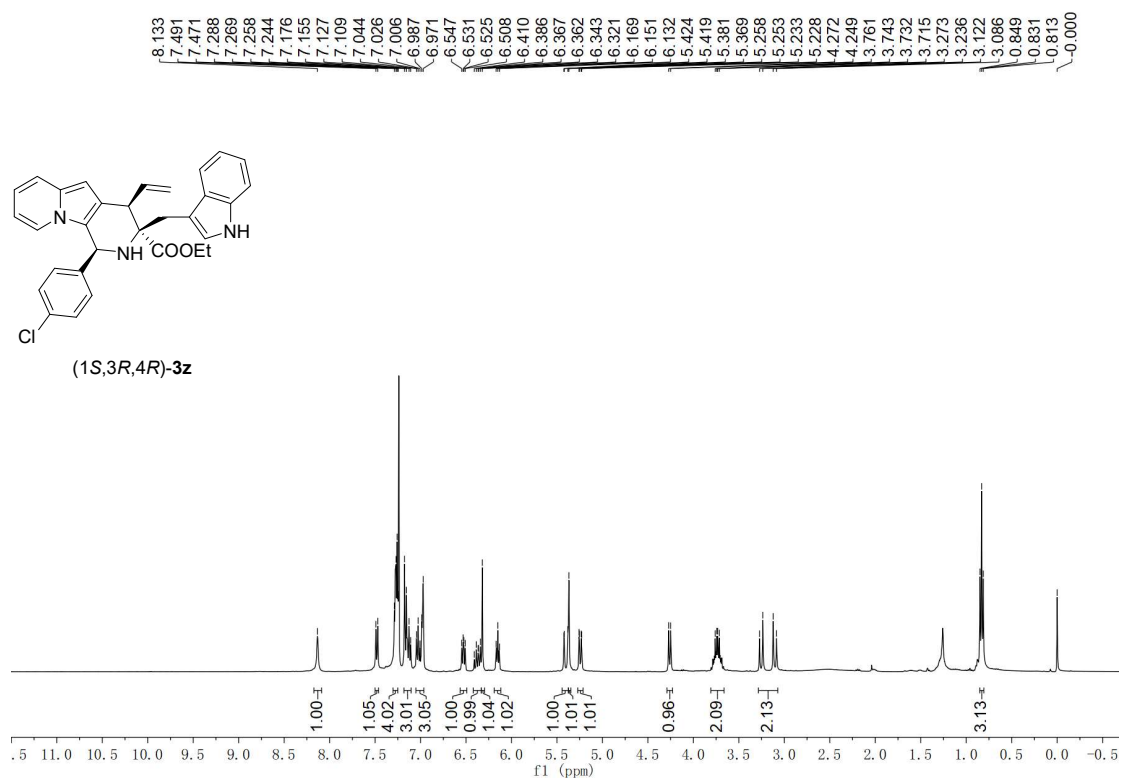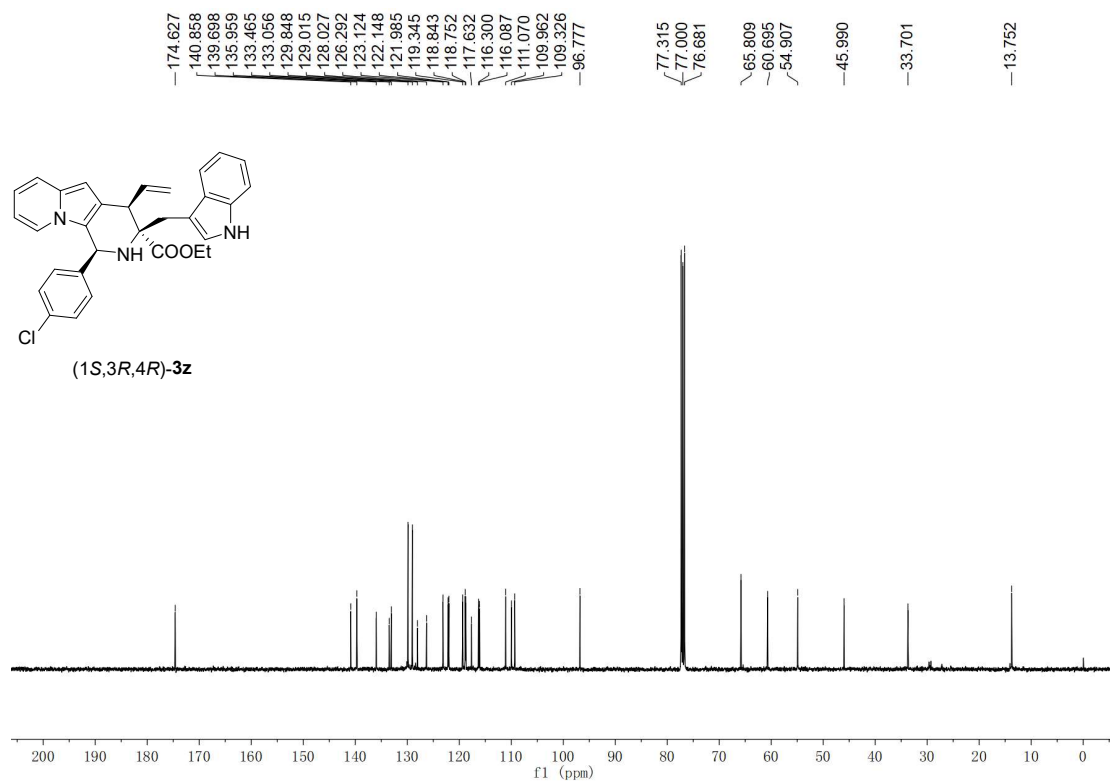

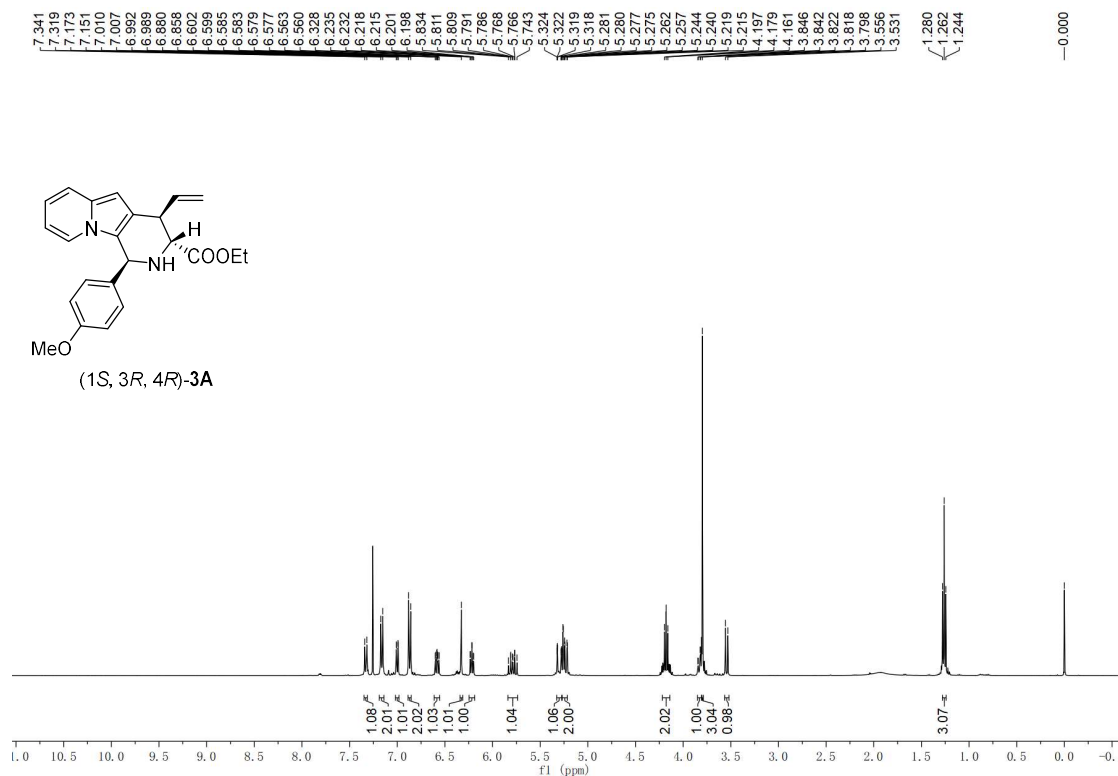

**<sup>1</sup>H NMR (400 MHz) of (1S, 3R, 4R)-3A in CDCl<sub>3</sub>**

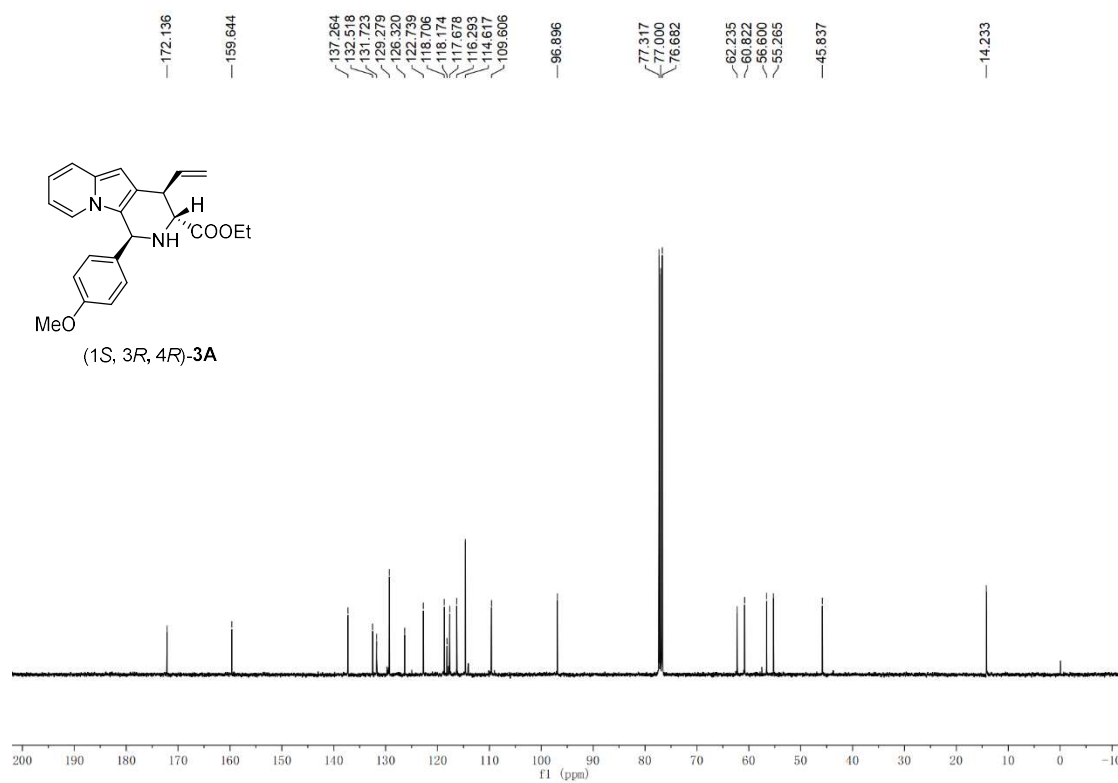

**<sup>13</sup>C NMR (100 MHz) of (1S, 3R, 4R)-3A in CDCl<sub>3</sub>**

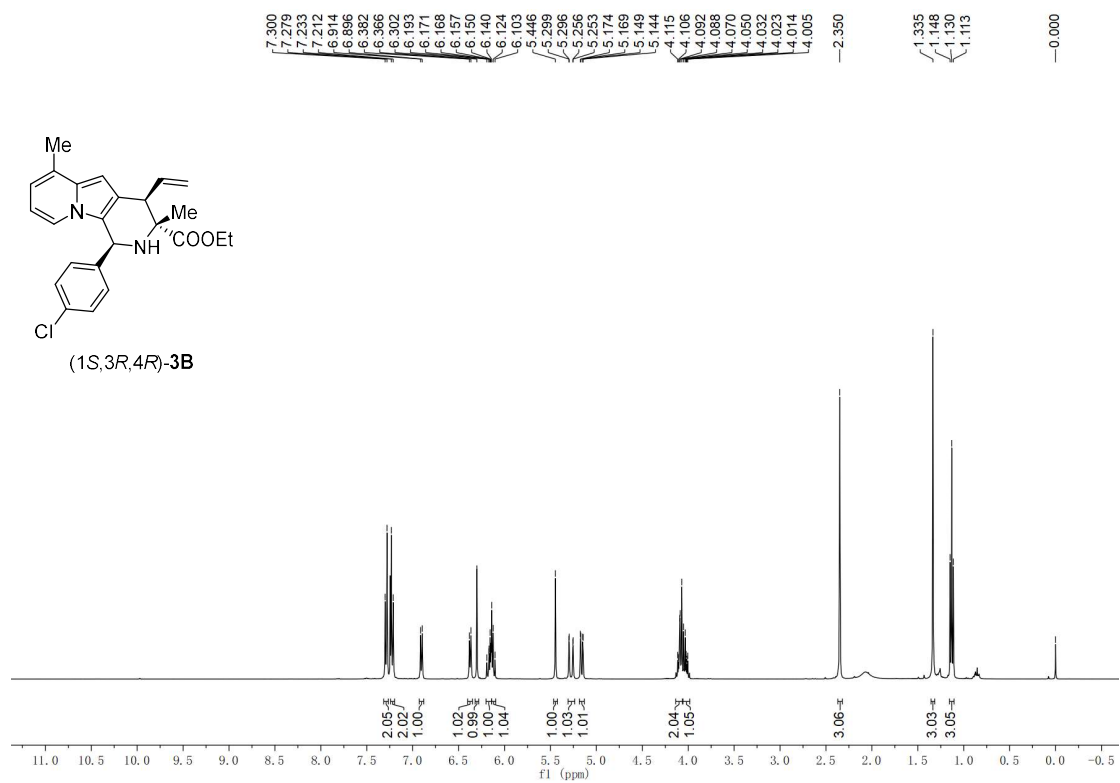

$^1\text{H}$  NMR (400 MHz) of (1*S*, 3*R*, 4*R*)-**3B** in  $\text{CDCl}_3$

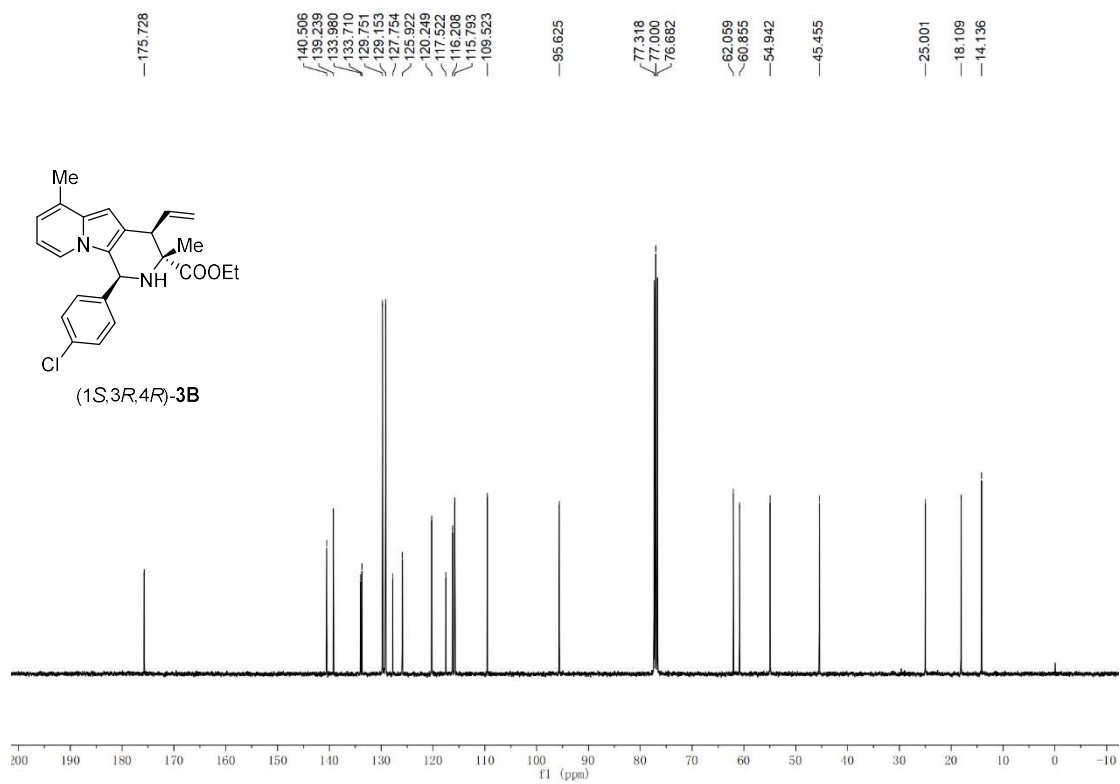

$^{13}\text{C}$  NMR (100 MHz) of (1*S*, 3*R*, 4*R*)-**3B** in  $\text{CDCl}_3$



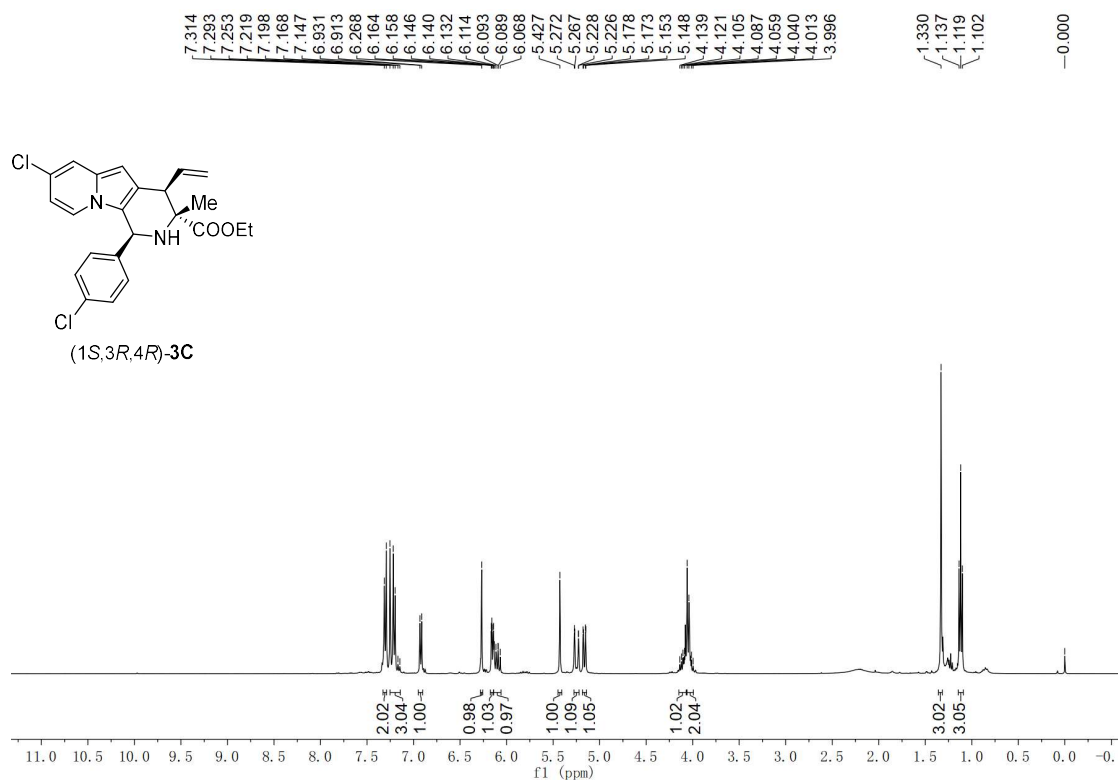

<sup>1</sup>H NMR (400 MHz) of (1*S*, 3*R*, 4*R*)-**3C** in CDCl<sub>3</sub>

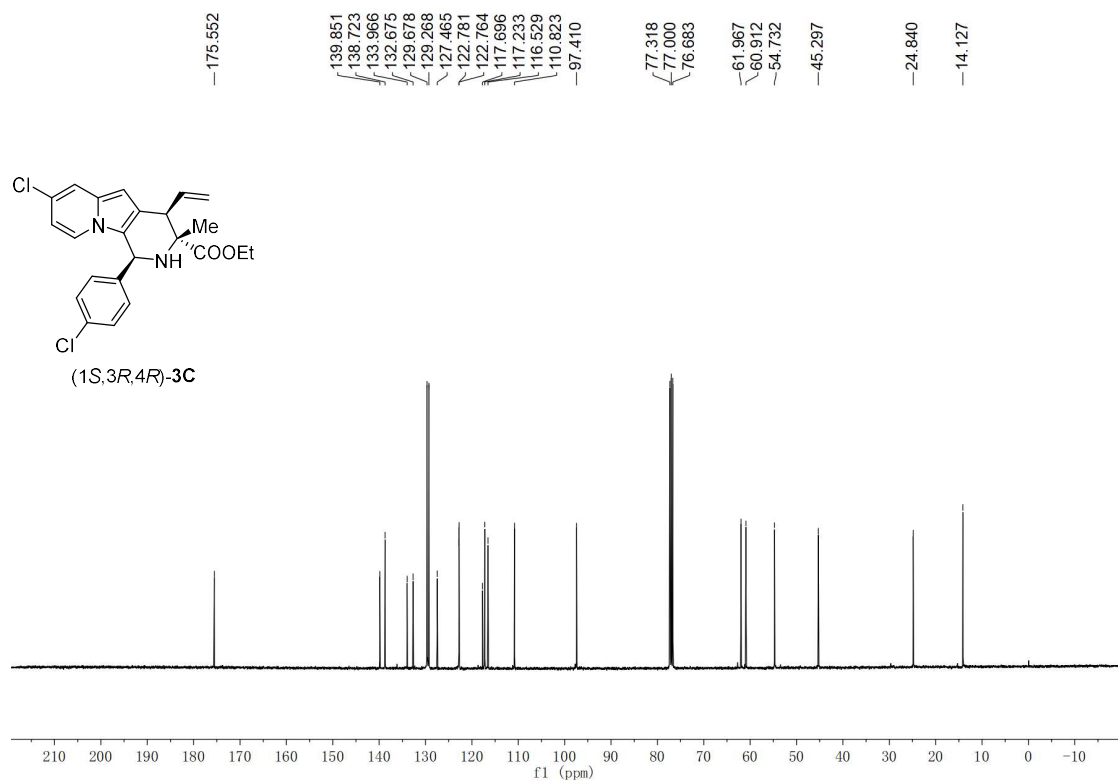

<sup>13</sup>C NMR (100 MHz) of (1*S*, 3*R*, 4*R*)-**3C** in CDCl<sub>3</sub>

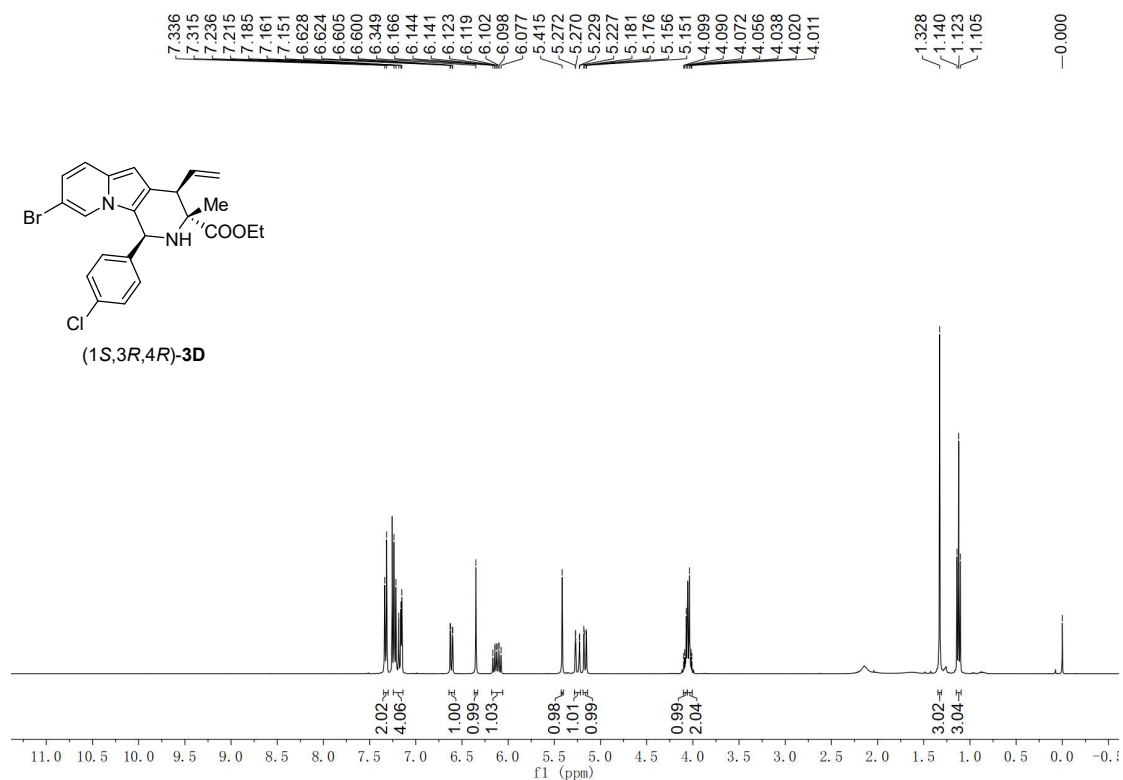

<sup>1</sup>H NMR (400 MHz) of (1*S*, 3*R*, 4*R*)-**3D** in CDCl<sub>3</sub>

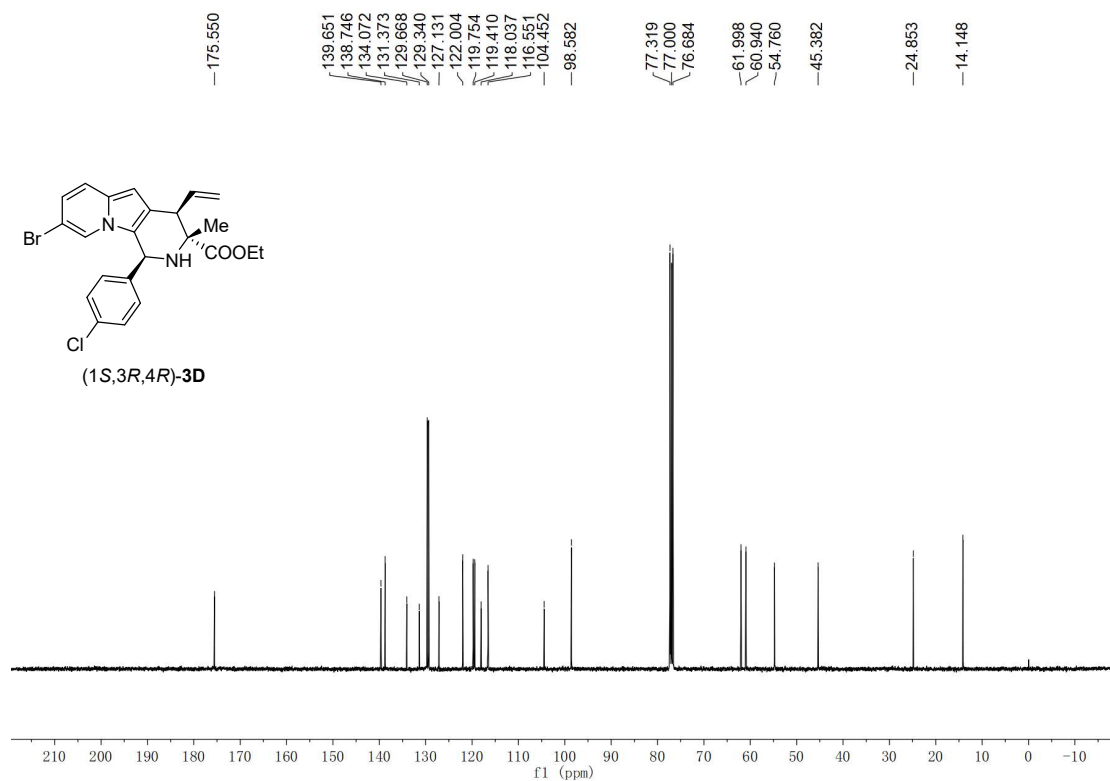

<sup>13</sup>C NMR (100 MHz) of (1*S*, 3*R*, 4*R*)-**3D** in CDCl<sub>3</sub>

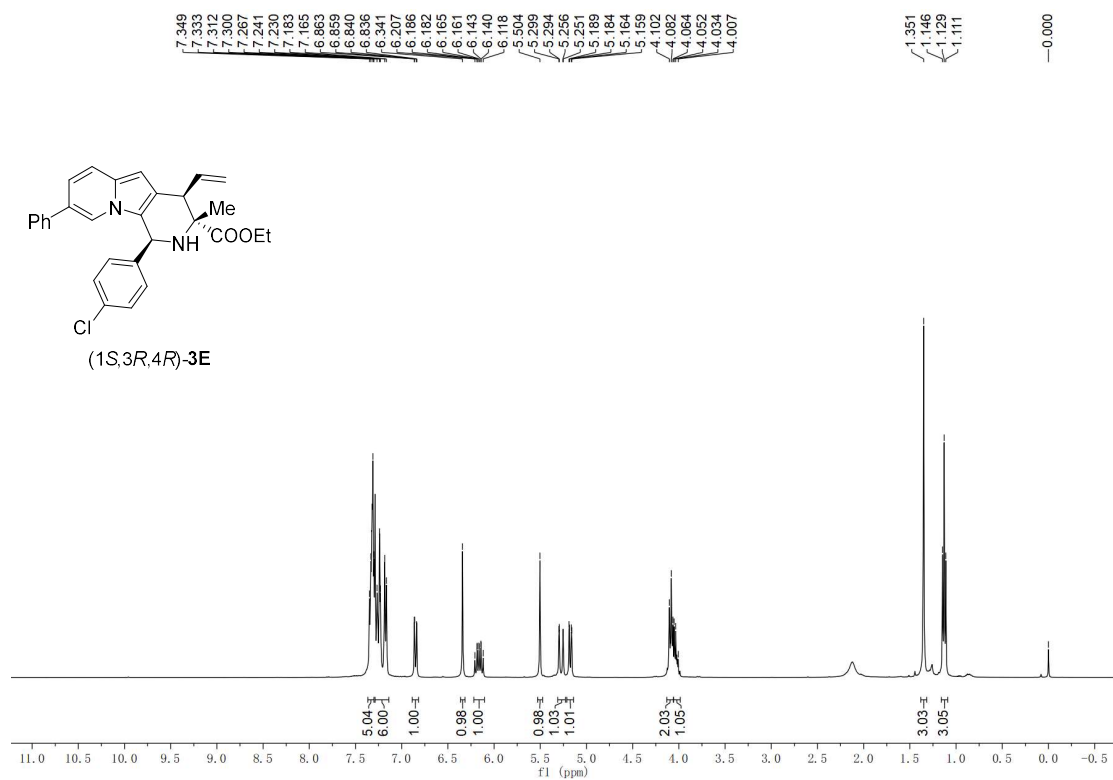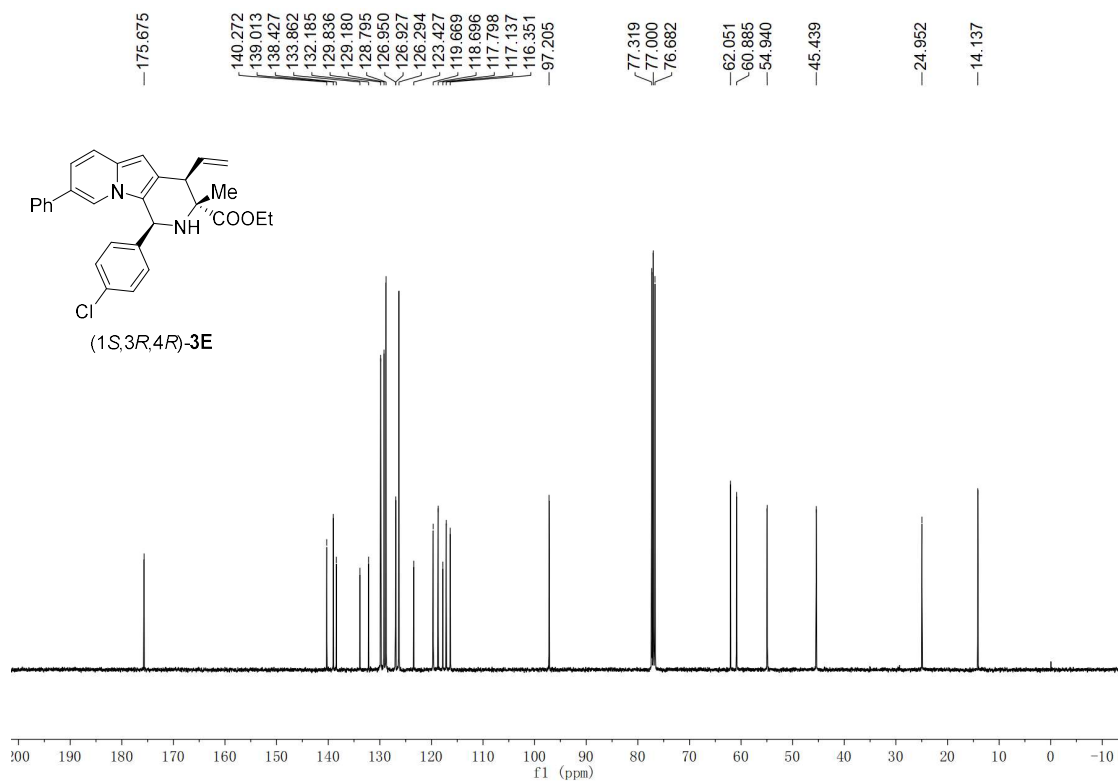

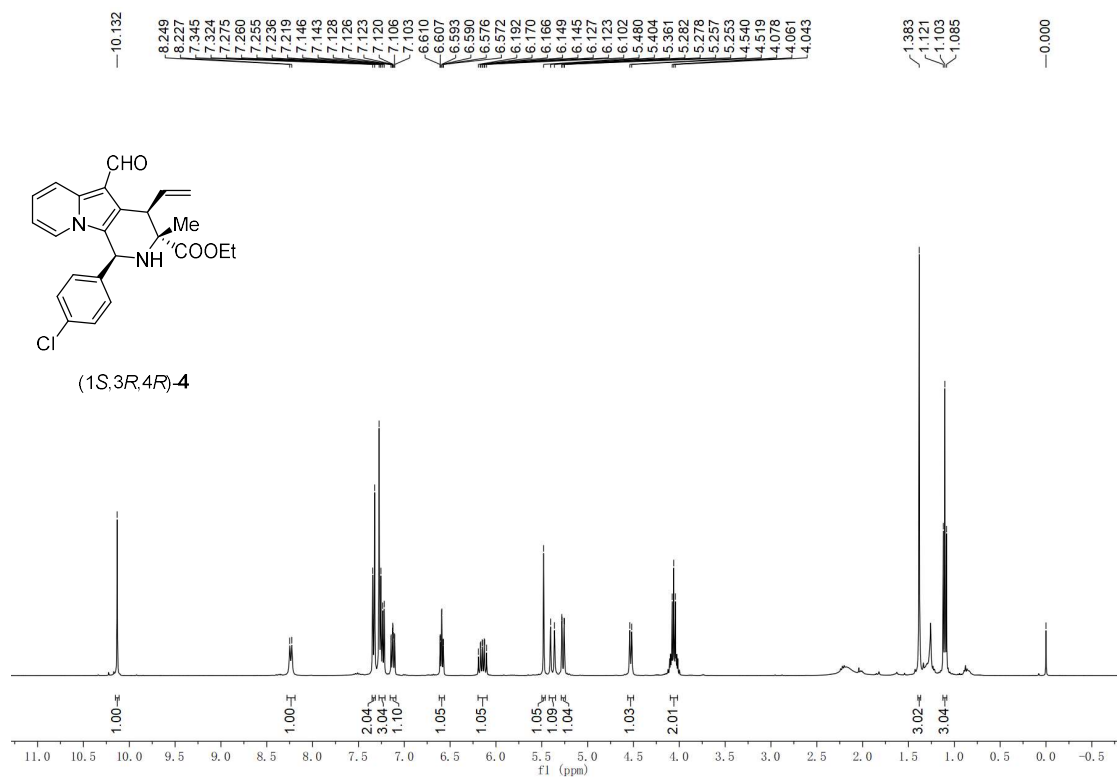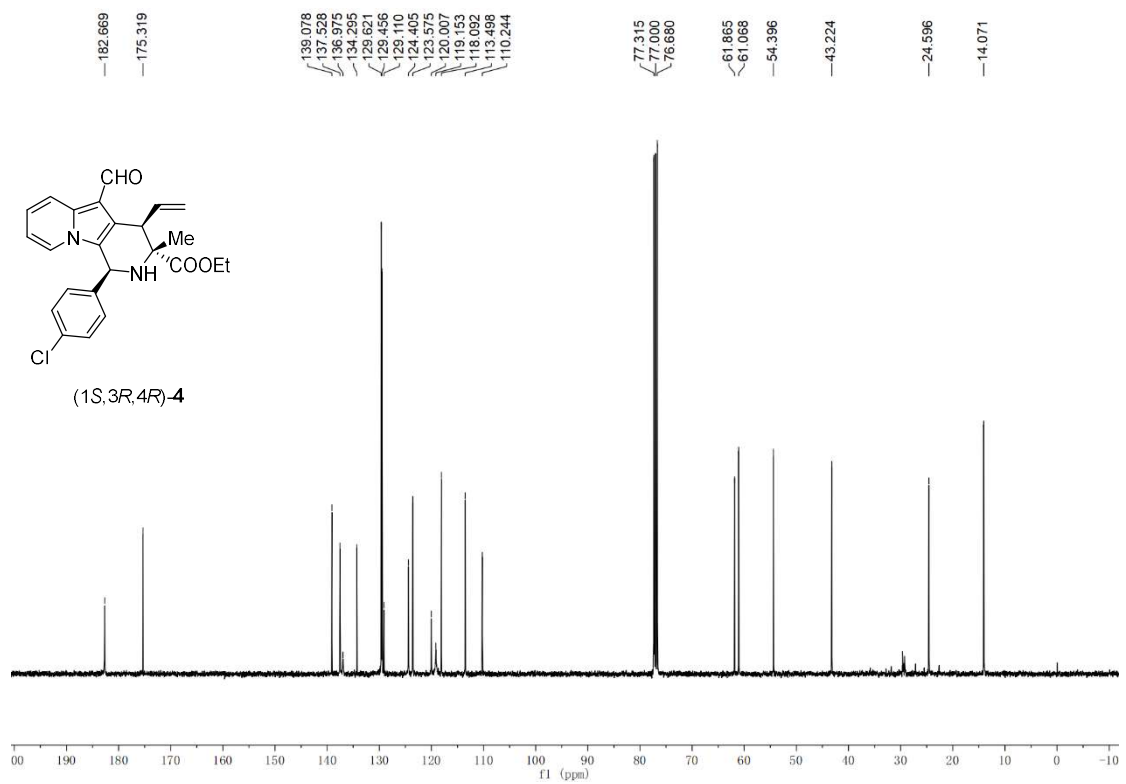

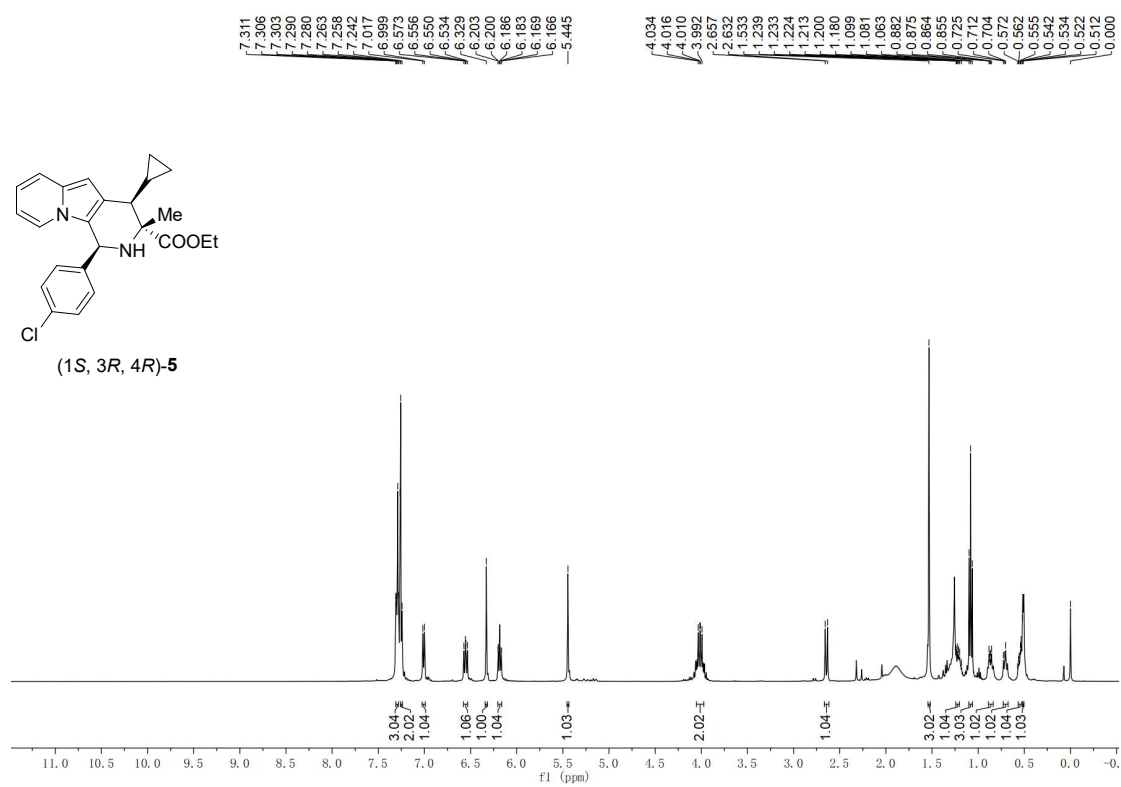

<sup>1</sup>H NMR (400 MHz) of (1*S*, 3*R*, 4*R*)-**5** in CDCl<sub>3</sub>

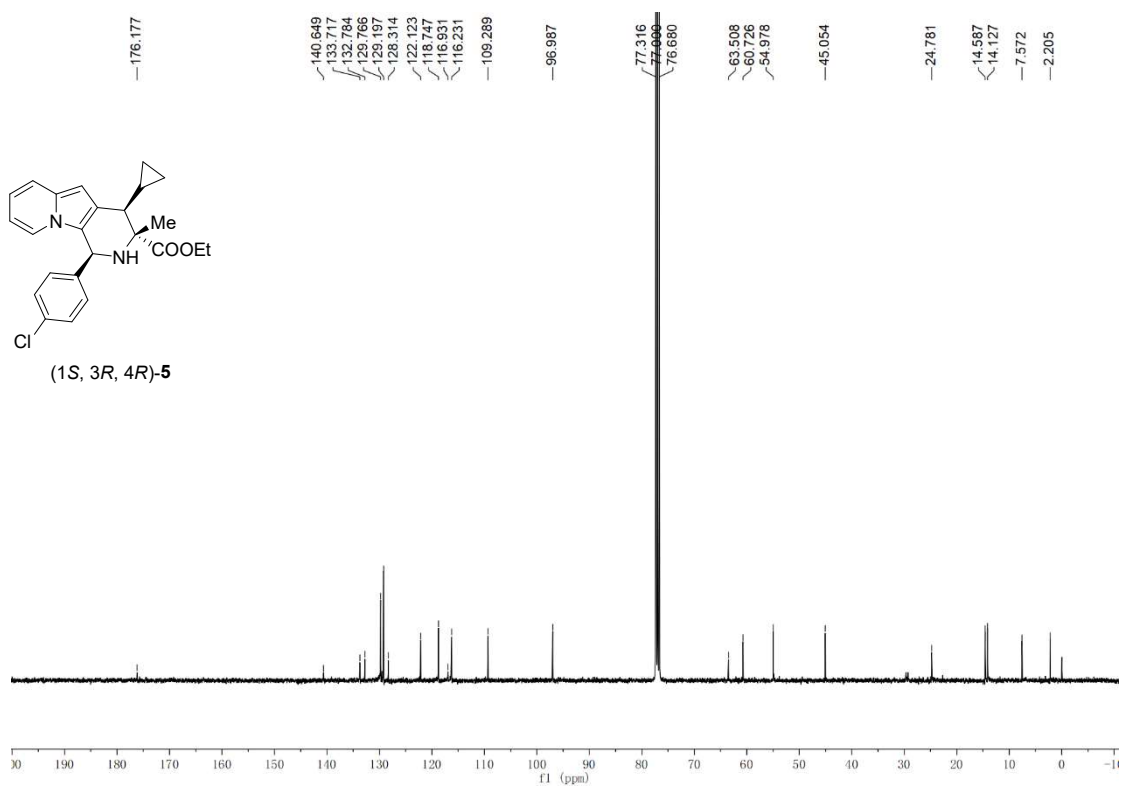

<sup>13</sup>C NMR (100 MHz) of (1*S*, 3*R*, 4*R*)-**5** in CDCl<sub>3</sub>

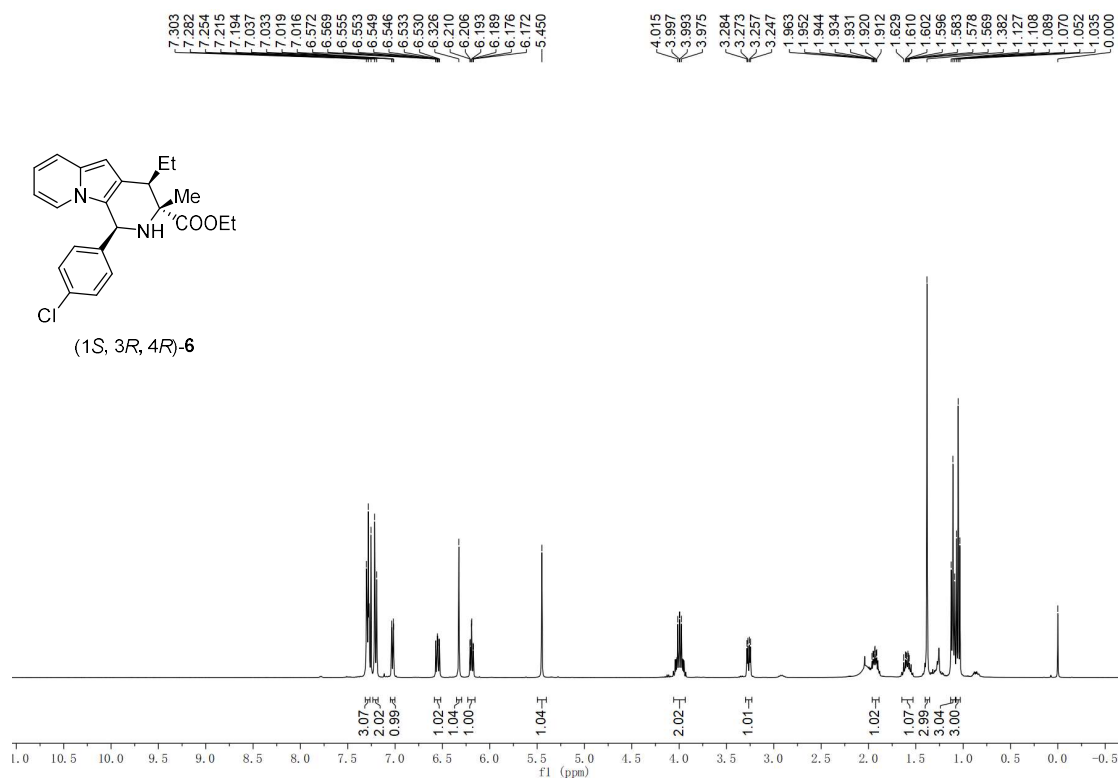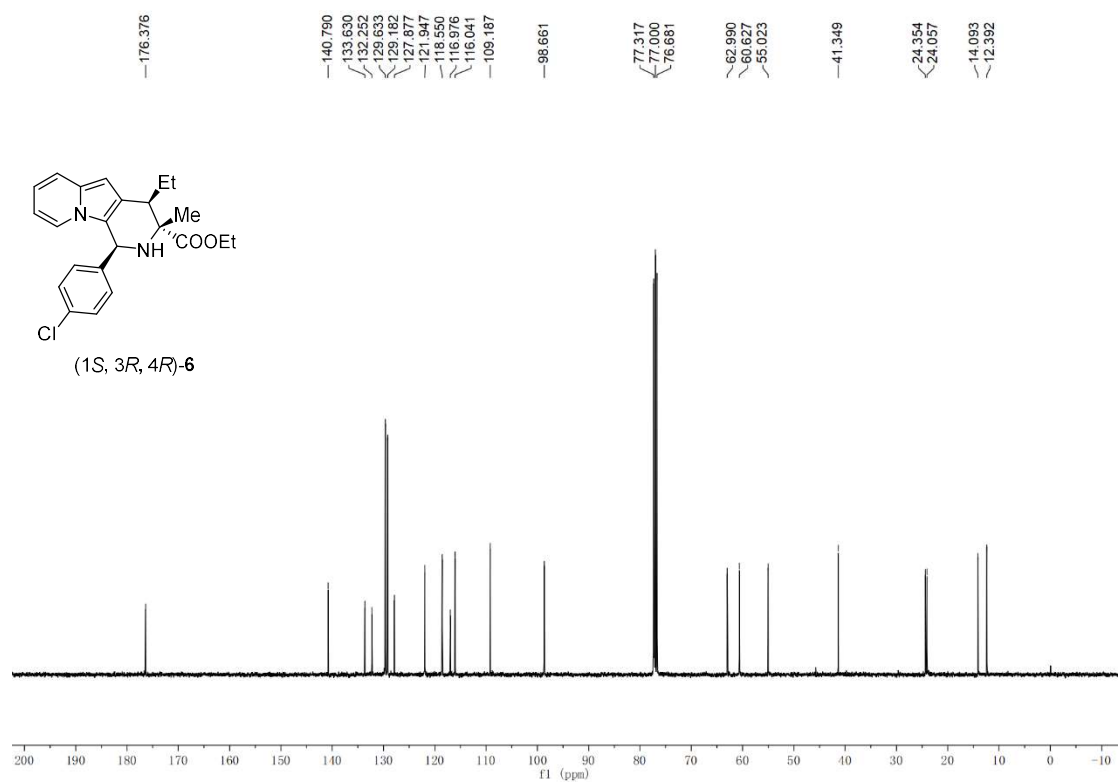

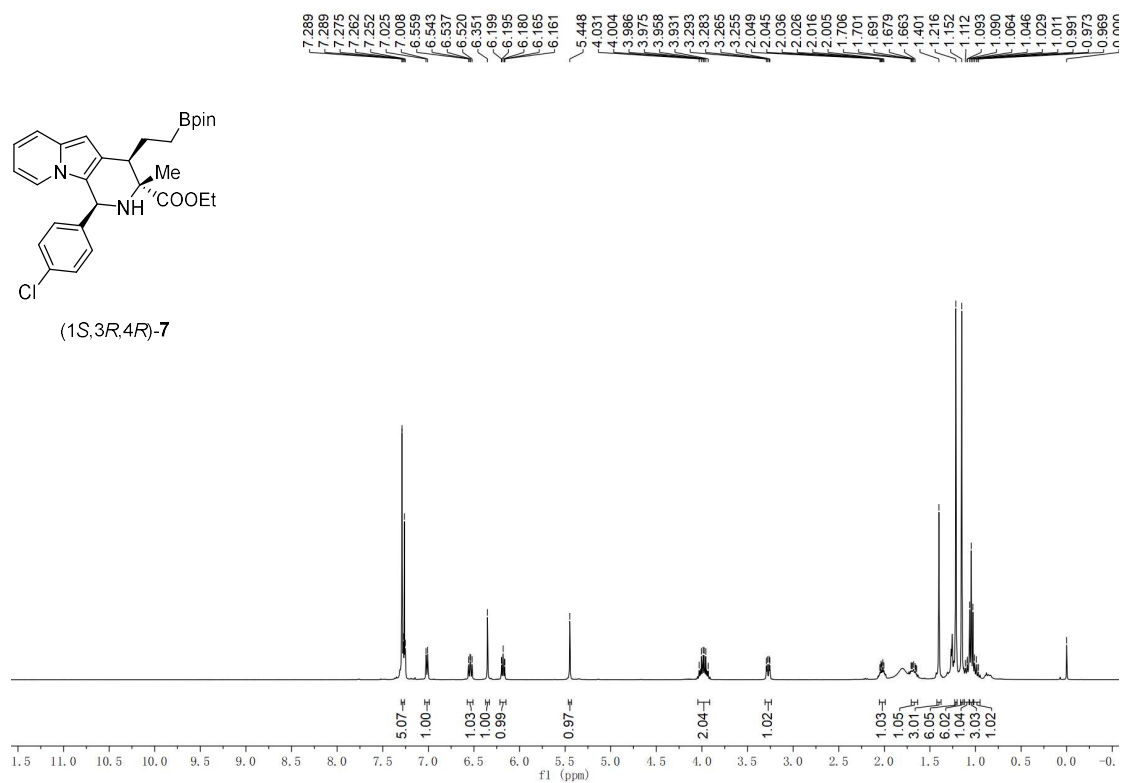

<sup>1</sup>H NMR (400 MHz) of (1*S*, 3*R*, 4*R*)-7 in CDCl<sub>3</sub>

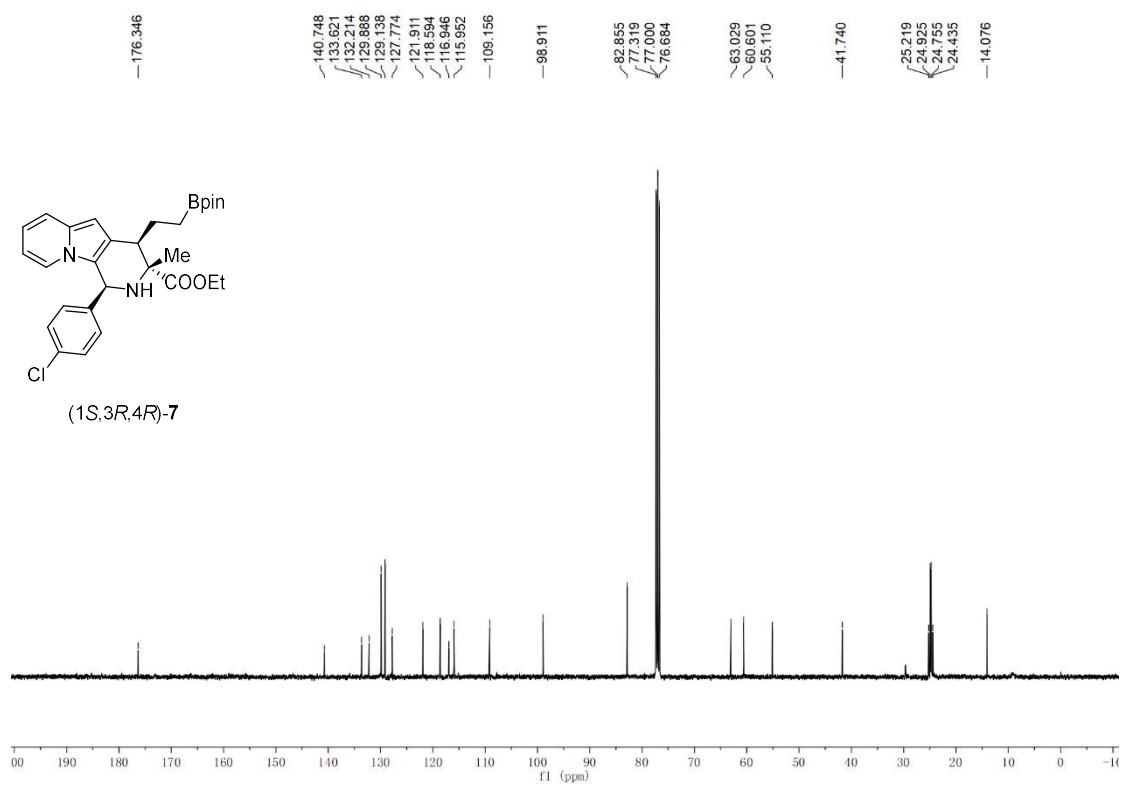

<sup>13</sup>C NMR (100 MHz) of (1*S*, 3*R*, 4*R*)-7 in CDCl<sub>3</sub>

# HPLC chromatogram of compound (rac)-3a

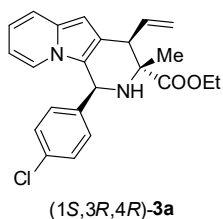

Data File D:\LC\DATA\ZBK\ZBK-3-58-1RAC 2021-05-12 09-22-42\ZBK-3-58-1RAC1.D  
 Sample Name: ZBK-3-58-1RAC

```

=====
Acq. Operator   : 系统                               Seq. Line :    2
Sample Operator : 系统
Acq. Instrument : 1200                               Location  :   31
Injection Date  : 5/12/2021 9:34:53 AM              Inj       :    1
                                                    Inj Volume: 5.000 µl
Acq. Method    : D:\LC\DATA\ZBK\ZBK-3-58-1RAC 2021-05-12 09-22-42\P1-AD-H-90-10-254NM-1ML-
                SUL-30MIN.M
Last changed   : 5/12/2021 9:55:01 AM by 系统
                (modified after loading)
Analysis Method : D:\LC\DATA\ZBK\ZBK-3-58-1RAC 2021-05-12 09-22-42\P1-AD-H-90-10-254NM-1ML-
                SUL-30MIN.M (Sequence Method)
Last changed   : 7/28/2021 8:45:25 PM by 系统
                (modified after loading)
Additional Info : Peak(s) manually integrated
  
```

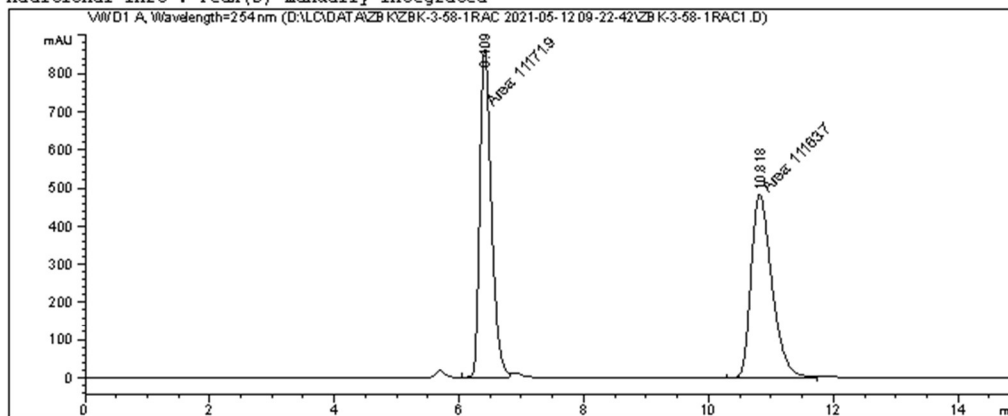

## Area Percent Report

```

Sorted By      :      Signal
Multiplier     :      1.0000
Dilution       :      1.0000
Do not use Multiplier & Dilution Factor with ISTDs
  
```

Signal 1: WVD1 A, Wavelength=254 nm

| Peak # | RetTime [min] | Type | Width [min] | Area [mAU*s] | Height [mAU] | Area %  |
|--------|---------------|------|-------------|--------------|--------------|---------|
| 1      | 6.409         | MF   | 0.2160      | 1.11719e4    | 861.98682    | 50.0184 |
| 2      | 10.818        | MF   | 0.3860      | 1.11637e4    | 482.07657    | 49.9816 |

Totals : 2.23356e4 1344.06339

\*\*\* End of Report \*\*\*



# HPLC chromatogram of compound (1S,3R,4R)-3a



Data File D:\LC\DATA\ZBK\ZBK-3-58-1 2021-05-11 16-29-17\ZBK-3-58-11.D  
 Sample Name: ZBK-3-58R/R

```

=====
Acq. Operator   : 系统                               Seq. Line :    2
Sample Operator : 系统
Acq. Instrument : 1200                               Location  :   73
Injection Date  : 5/11/2021 4:43:10 PM              Inj       :    1
                                                    Inj Volume: 5.000 µl
Acq. Method     : D:\LC\DATA\ZBK\ZBK-3-58-1 2021-05-11 16-29-17\P1-AD-H-90-10-254NM-1ML-5UL-30MIN.M
Last changed    : 5/7/2021 10:11:20 PM by 系统
Analysis Method : D:\LC\DATA\ZBK\ZBK-3-58-1 2021-05-11 16-29-17\P1-AD-H-90-10-254NM-1ML-5UL-30MIN.M (Sequence Method)
Last changed    : 7/28/2021 8:50:28 PM by 系统
                 (modified after loading)
Additional Info : Peak(s) manually integrated
  
```

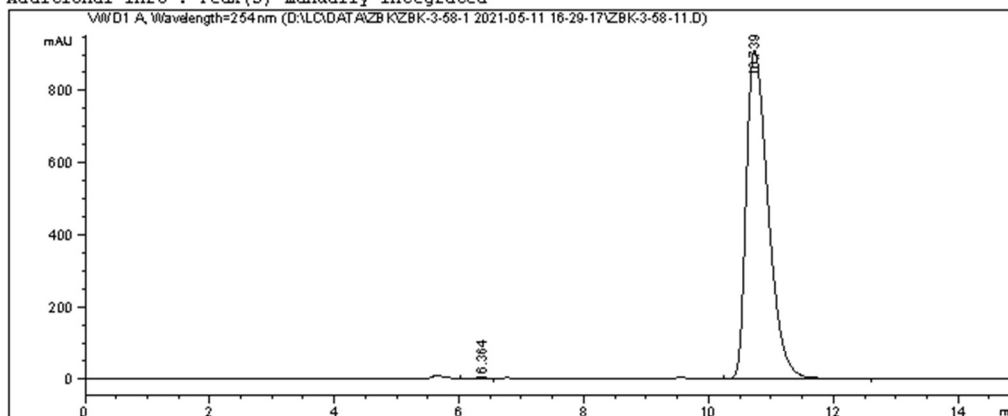

## Area Percent Report

```

Sorted By      :      Signal
Multiplier     :      1.0000
Dilution       :      1.0000
Do not use Multiplier & Dilution Factor with ISTDs
  
```

Signal 1: VWD1 A, Wavelength=254 nm

| Peak #   | RetTime [min] | Type | Width [min] | Area [mAU*s] | Height [mAU] | Area %  |
|----------|---------------|------|-------------|--------------|--------------|---------|
| 1        | 6.364         | VV   | 0.2592      | 39.57529     | 2.11342      | 0.1782  |
| 2        | 10.739        | BV R | 0.3773      | 2.21704e4    | 910.35876    | 99.8218 |
| Totals : |               |      |             | 2.22100e4    | 912.47218    |         |

\*\*\* End of Report \*\*\*

# HPLC chromatogram of compound (1R,3S,4S)-3a

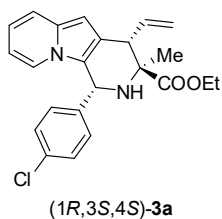

Data File D:\LC\DATA\ZBK\ZBK-3-58-1 2021-05-11 16-29-17\ZBK-3-58-12.D  
 Sample Name: ZBK-3-58S/S

```

=====
Acq. Operator   : 系统                               Seq. Line :    3
Sample Operator : 系统
Acq. Instrument : 1200                               Location  :   74
Injection Date  : 5/11/2021 5:14:28 PM              Inj       :    1
                                                    Inj Volume: 5.000 µl
Acq. Method     : D:\LC\DATA\ZBK\ZBK-3-58-1 2021-05-11 16-29-17\P1-AD-H-90-10-254NM-1ML-5UL-30MIN.M
Last changed    : 5/11/2021 5:24:35 PM by 系统
                  (modified after loading)
Analysis Method : D:\LC\DATA\ZBK\ZBK-3-58-1 2021-05-11 16-29-17\P1-AD-H-90-10-254NM-1ML-5UL-30MIN.M (Sequence Method)
Last changed    : 7/28/2021 8:48:36 PM by 系统
                  (modified after loading)
Additional Info  : Peak(s) manually integrated
  
```

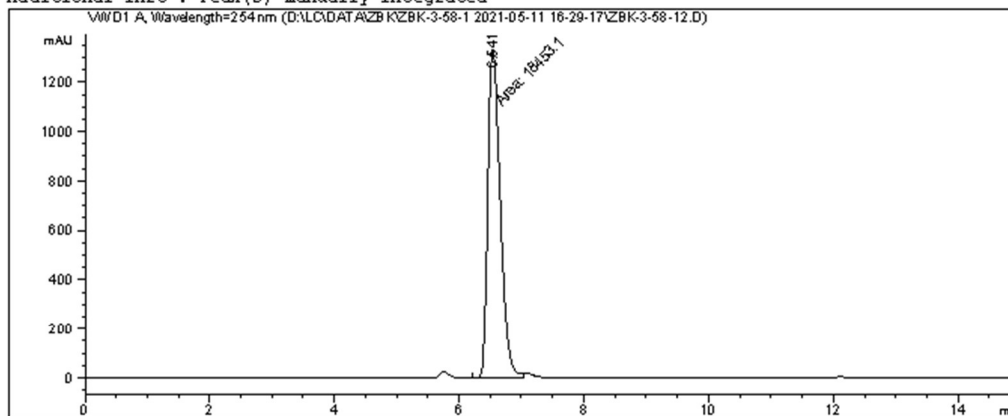

## Area Percent Report

```

Sorted By      :      Signal
Multiplier     :      1.0000
Dilution       :      1.0000
Do not use Multiplier & Dilution Factor with ISTDs
  
```

Signal 1: WWD1 A, Wavelength=254 nm

| Peak # | RetTime [min] | Type | Width [min] | Area [mAU*s] | Height [mAU] | Area %   |
|--------|---------------|------|-------------|--------------|--------------|----------|
| 1      | 6.541         | MF   | 0.2310      | 1.84531e4    | 1331.23181   | 100.0000 |

Totals : 1.84531e4 1331.23181

\*\*\* End of Report \*\*\*

# HPLC chromatogram of compound (rac)-3a

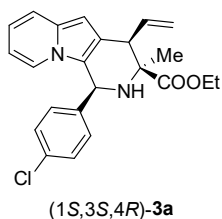

Data File D:\LC\DATA\ZBK\ZBK-3-58-2 2021-05-07 22-13-15\ZBK-3-58-22.D  
 Sample Name: ZBK-3-58-2RAC

```

=====
Acq. Operator   : 系统                               Seq. Line :    3
Sample Operator : 系统
Acq. Instrument : 1200                               Location  :   32
Injection Date  : 5/7/2021 10:56:44 PM              Inj       :    1
                                                    Inj Volume: 5.000 µl
Acq. Method     : D:\LC\DATA\ZBK\ZBK-3-58-2 2021-05-07 22-13-15\P1-AD-H-90-10-254NM-1ML-5UL-30MIN.M
Last changed    : 5/7/2021 10:11:20 PM by 系统
Analysis Method : D:\LC\DATA\ZBK\ZBK-3-58-2 2021-05-07 22-13-15\P1-AD-H-90-10-254NM-1ML-5UL-30MIN.M (Sequence Method)
Last changed    : 7/28/2021 8:52:06 PM by 系统
                (modified after loading)
Additional Info : Peak(s) manually integrated
  
```

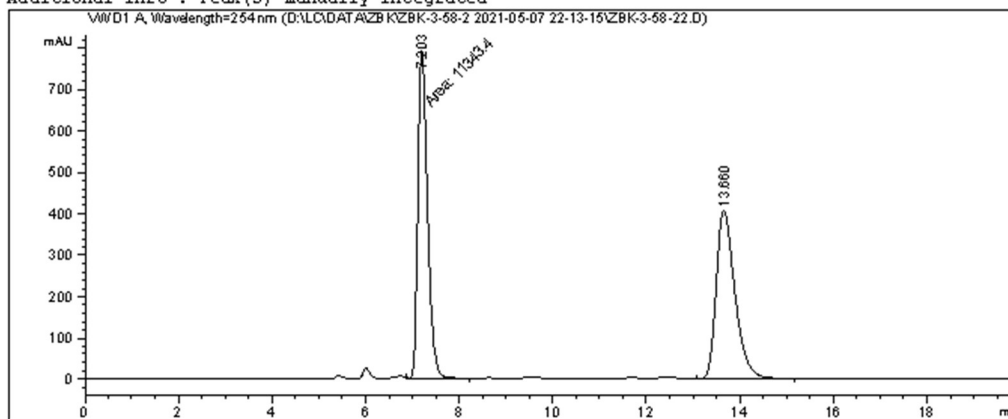

## Area Percent Report

```

Sorted By      :      Signal
Multiplier     :      1.0000
Dilution       :      1.0000
Do not use Multiplier & Dilution Factor with ISTDs
  
```

Signal 1: VWD1 A, Wavelength=254 nm

| Peak # | RetTime [min] | Type | Width [min] | Area [mAU*s] | Height [mAU] | Area %  |
|--------|---------------|------|-------------|--------------|--------------|---------|
| 1      | 7.203         | FM   | 0.2387      | 1.13434e4    | 792.11041    | 50.1218 |
| 2      | 13.660        | BV R | 0.4248      | 1.12883e4    | 406.05557    | 49.8782 |

Totals :                    2.26317e4 1198.16599

\*\*\* End of Report \*\*\*

# HPLC chromatogram of compound (1R,3R,4S)-3a

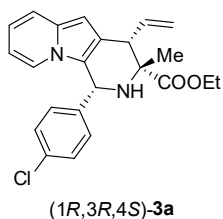

Data File D:\LC\DATA\ZBK\ZBK-3-58-2 2021-05-07 22-13-15\ZBK-3-58-21.D  
 Sample Name: ZBK-3-58R/S

```

=====
Acq. Operator   : 系统                               Seq. Line :    2
Sample Operator : 系统
Acq. Instrument : 1200                               Location  :   31
Injection Date  : 5/7/2021 10:25:30 PM              Inj       :    1
                                                    Inj Volume: 5.000 µl
Acq. Method     : D:\LC\DATA\ZBK\ZBK-3-58-2 2021-05-07 22-13-15\P1-AD-H-90-10-254NM-1ML-5UL-30MIN.M
Last changed    : 5/7/2021 10:11:20 PM by 系统
Analysis Method : D:\LC\DATA\ZBK\ZBK-3-58-2 2021-05-07 22-13-15\P1-AD-H-90-10-254NM-1ML-5UL-30MIN.M (Sequence Method)
Last changed    : 7/28/2021 8:53:49 PM by 系统
                  (modified after loading)
Additional Info : Peak(s) manually integrated
    
```

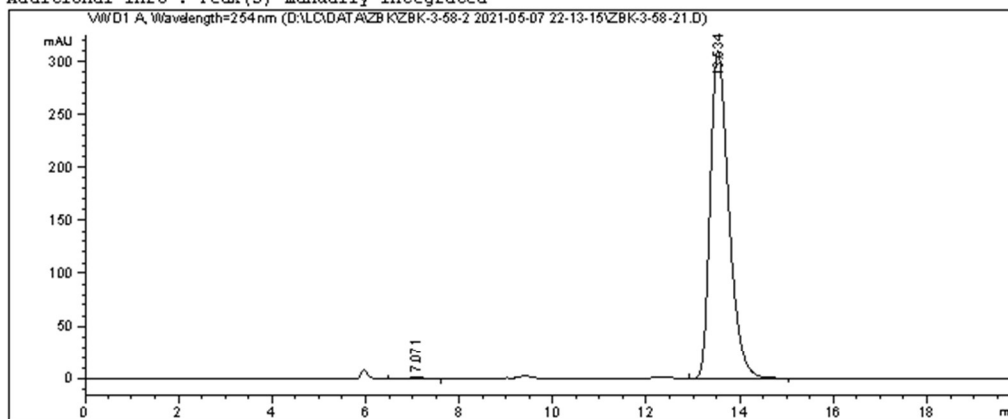

## Area Percent Report

```

Sorted By      :      Signal
Multiplier     :      1.0000
Dilution       :      1.0000
Do not use Multiplier & Dilution Factor with ISTDs
    
```

Signal 1: VWD1 A, Wavelength=254 nm

| Peak # | RetTime [min] | Type | Width [min] | Area [mAU*s] | Height [mAU] | Area %  |
|--------|---------------|------|-------------|--------------|--------------|---------|
| 1      | 7.071         | VV R | 0.2365      | 28.04296     | 1.71005      | 0.3259  |
| 2      | 13.534        | BB   | 0.4214      | 8575.84766   | 310.38681    | 99.6741 |

Totals : 8603.89062 312.09686

\*\*\* End of Report \*\*\*

# HPLC chromatogram of compound (1S,3S,4R)-3a

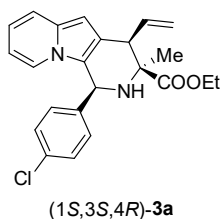

Data File D:\LC\DATA\ZBK\ZBK-3-58-2 2021-05-07 22-13-15\ZBK-3-58-23.D  
 Sample Name: ZBK-3-58S/R

```

=====
Acq. Operator   : 系统                               Seq. Line :    4
Sample Operator : 系统
Acq. Instrument : 1200                               Location  :   33
Injection Date  : 5/7/2021 11:27:59 PM              Inj       :    1
                                                    Inj Volume: 5.000 µl
Acq. Method     : D:\LC\DATA\ZBK\ZBK-3-58-2 2021-05-07 22-13-15\P1-AD-H-90-10-254NM-1ML-5UL-30MIN.M
Last changed    : 5/7/2021 10:11:20 PM by 系统
Analysis Method : D:\LC\DATA\ZBK\ZBK-3-58-2 2021-05-07 22-13-15\P1-AD-H-90-10-254NM-1ML-5UL-30MIN.M (Sequence Method)
Last changed    : 7/28/2021 8:55:04 PM by 系统
                (modified after loading)
Additional Info : Peak(s) manually integrated
  
```

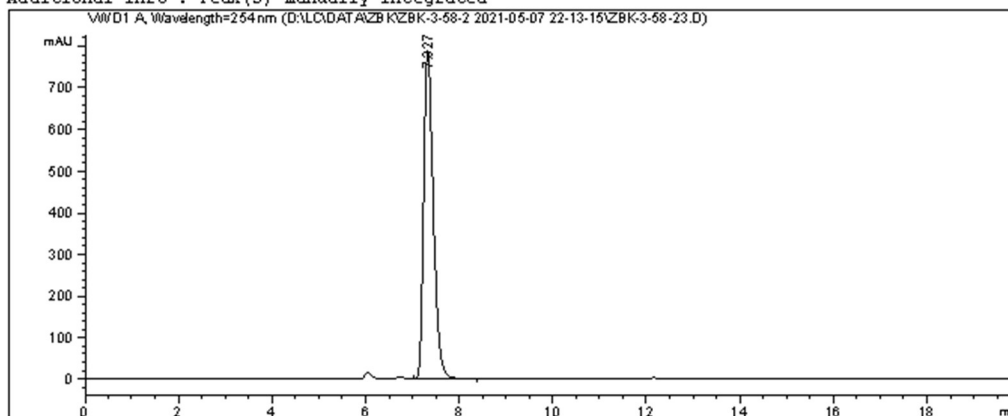

## Area Percent Report

```

Sorted By      :      Signal
Multiplier     :      1.0000
Dilution       :      1.0000
Do not use Multiplier & Dilution Factor with ISTDs
  
```

Signal 1: VWD1 A, Wavelength=254 nm

| Peak # | RetTime [min] | Type | Width [min] | Area [mAU*s] | Height [mAU] | Area %   |
|--------|---------------|------|-------------|--------------|--------------|----------|
| 1      | 7.327         | BB   | 0.2198      | 1.13153e4    | 788.81274    | 100.0000 |

Totals : 1.13153e4 788.81274

\*\*\* End of Report \*\*\*

# HPLC chromatogram of compound (rac)-3b

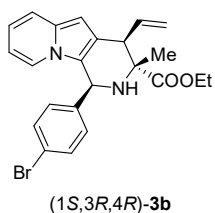

Data File D:\LC\DATA\ZBK\ZBK-2-150-151RAC-3 2021-02-27 20-17-16\ZBK-2-150-151RAC-3.D  
 Sample Name: ZBK-2-150-151RAC-2

```

=====
Acq. Operator   : 系统                               Seq. Line :    1
Sample Operator : 系统
Acq. Instrument : 1200                               Location  :   42
Injection Date  : 2/27/2021 8:18:45 PM              Inj       :    1
                                                    Inj Volume: 5.000 µl
Acq. Method     : D:\LC\DATA\ZBK\ZBK-2-150-151RAC-3 2021-02-27 20-17-16\P1-AD-H-80-20-254NM-
                  1ML-5UL-20MIN.M
Last changed    : 1/14/2021 2:49:11 PM by 系统
Analysis Method : D:\LC\DATA\ZBK\ZBK-2-150-151RAC-3 2021-02-27 20-17-16\P1-AD-H-80-20-254NM-
                  1ML-5UL-20MIN.M (Sequence Method)
Last changed    : 7/28/2021 8:00:37 PM by 系统
                  (modified after loading)
Additional Info : Peak(s) manually integrated
  
```

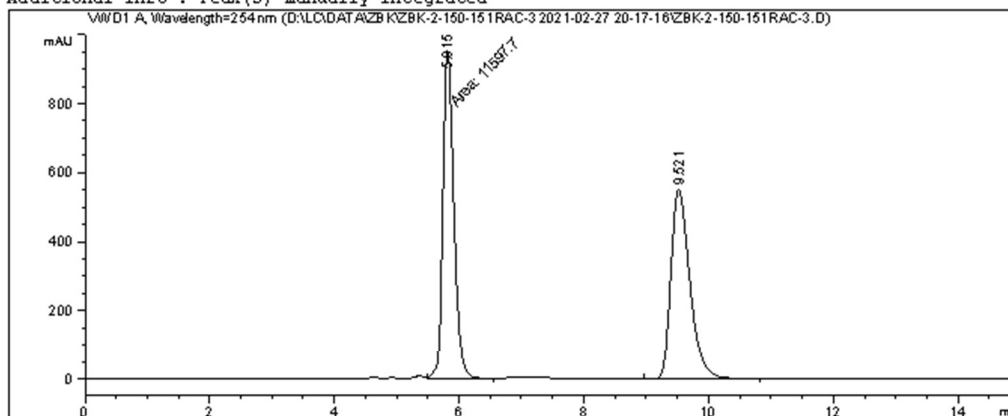

## Area Percent Report

```

Sorted By      :      Signal
Multiplier     :      1.0000
Dilution       :      1.0000
Do not use Multiplier & Dilution Factor with ISTDs
  
```

Signal 1: VWD1 A, Wavelength=254 nm

| Peak # | RetTime [min] | Type | Width [min] | Area [mAU*s] | Height [mAU] | Area %  |
|--------|---------------|------|-------------|--------------|--------------|---------|
| 1      | 5.815         | FM   | 0.2027      | 1.15977e4    | 953.43475    | 49.9684 |
| 2      | 9.521         | BV R | 0.3227      | 1.16123e4    | 551.72522    | 50.0316 |

Totals : 2.32100e4 1505.15997

\*\*\* End of Report \*\*\*

# HPLC chromatogram of compound (1S,3R,4R)-3b



Data File D:\LC\DATA\ZBK\ZBK-2-150-151-2 2021-02-27 18-34-15\ZBK-2-150-151-21.D  
 Sample Name: ZBK-2-150-2

```

=====
Acq. Operator   : 系统                               Seq. Line :    2
Sample Operator : 系统
Acq. Instrument : 1200                               Location  :   42
Injection Date  : 2/27/2021 6:46:34 PM              Inj       :    1
                                                    Inj Volume: 5.000 µl
Acq. Method     : D:\LC\DATA\ZBK\ZBK-2-150-151-2 2021-02-27 18-34-15\P1-AD-H-80-20-254NM-1ML-
                  SUL-20MIN.M
Last changed    : 1/14/2021 2:49:11 PM by 系统
Analysis Method : D:\LC\DATA\ZBK\ZBK-2-150-151-2 2021-02-27 18-34-15\P1-AD-H-80-20-254NM-1ML-
                  SUL-20MIN.M (Sequence Method)
Last changed    : 7/28/2021 8:03:09 PM by 系统
                  (modified after loading)
  
```

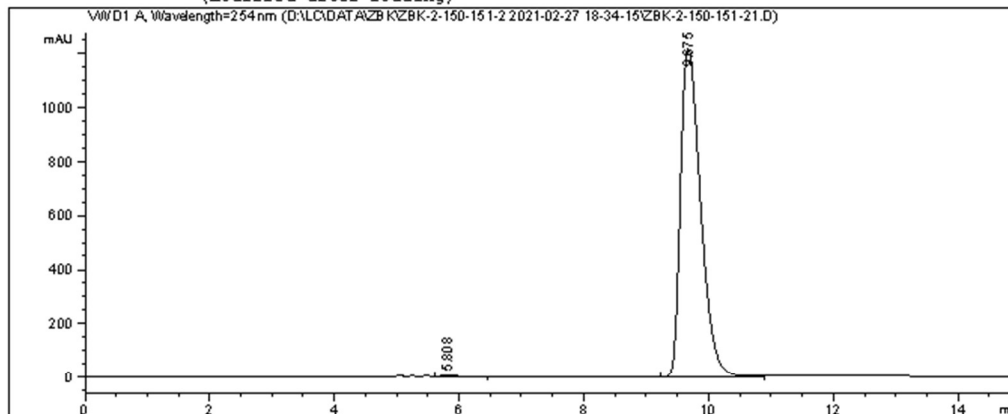

=====  
 Area Percent Report  
 =====

```

Sorted By      :      Signal
Multiplier     :      1.0000
Dilution       :      1.0000
Do not use Multiplier & Dilution Factor with ISTDs
  
```

Signal 1: WWD1 A, Wavelength=254 nm

| Peak # | RetTime [min] | Type | Width [min] | Area [mAU*s] | Height [mAU] | Area %  |
|--------|---------------|------|-------------|--------------|--------------|---------|
| 1      | 5.808         | BV R | 0.1678      | 50.66753     | 4.44867      | 0.1866  |
| 2      | 9.675         | BB   | 0.3471      | 2.71031e4    | 1217.16809   | 99.8134 |

Totals :                    2.71537e4  1221.61677

=====  
 \*\*\* End of Report \*\*\*

# HPLC chromatogram of compound (rac)-3c

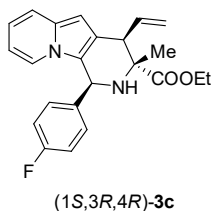

Data File D:\HPLC\Data\20220720\C 2022-07-20 16-32-16\C2.D  
 Sample Name: ZBK-4-117RAC

```

=====
Acq. Operator   : SYSTEM                      Seq. Line :    3
Sample Operator : SYSTEM
Acq. Instrument : 1260                       Location  :    1
Injection Date  : 7/20/2022 5:07:40 PM       Inj       :    2
                                           Inj Volume: 10.000 µl
Acq. Method     : D:\HPLC\Data\20220720\C 2022-07-20 16-32-16\ (1-6)-90-10-10uL-lml-40min-254nm.M
Last changed    : 7/20/2022 5:06:52 PM by SYSTEM
Analysis Method : D:\HPLC\Data\20220720\C 2022-07-20 16-32-16\ (1-6)-90-10-10uL-lml-40min-254nm.M
                 (Sequence Method)
Last changed    : 11/24/2022 6:41:29 PM by SYSTEM
                 (modified after loading)
Additional Info : Peak(s) manually integrated
  
```

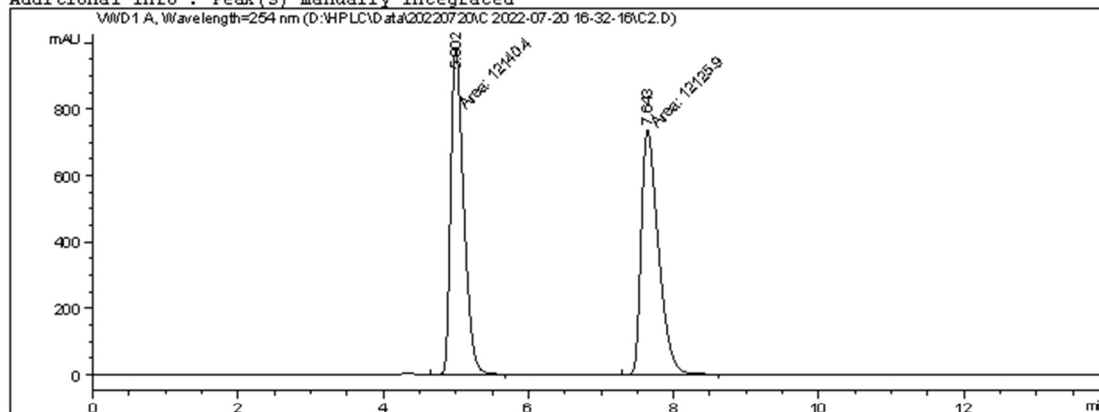

## Area Percent Report

```

Sorted By      :      Signal
Multiplier     :      1.0000
Dilution      :      1.0000
Do not use Multiplier & Dilution Factor with ISTDs
  
```

Signal 1: VWD1 A, Wavelength=254 nm

| Peak # | RetTime [min] | Type | Width [min] | Area [mAU*s] | Height [mAU] | Area %  |
|--------|---------------|------|-------------|--------------|--------------|---------|
| 1      | 5.002         | FM   | 0.2061      | 1.21404e4    | 981.62115    | 50.0299 |
| 2      | 7.643         | MF   | 0.2748      | 1.21259e4    | 735.54468    | 49.9701 |

Totals : 2.42663e4 1717.16583

\*\*\* End of Report \*\*\*



# HPLC chromatogram of compound (1S,3R,4R)-3c

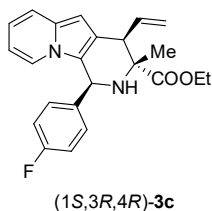

Data File D:\HPLC\Data\20220720\C 2022-07-20 16-32-16\C3.D  
 Sample Name: ZBK-4-117R/R

```

=====
Acq. Operator   : SYSTEM                      Seq. Line :    4
Sample Operator : SYSTEM                      Location  :    2
Acq. Instrument : 1260                       Inj       :    1
Injection Date  : 7/20/2022 5:28:29 PM      Inj Volume: 10.000 µl
Acq. Method     : D:\HPLC\Data\20220720\C 2022-07-20 16-32-16\ (1-6)-90-10-10uL-1ml-40min-254nm.M
Last changed    : 7/20/2022 5:06:52 PM by SYSTEM
Analysis Method : D:\HPLC\Data\20220720\C 2022-07-20 16-32-16\ (1-6)-90-10-10uL-1ml-40min-254nm.M
                  (Sequence Method)
Last changed    : 11/24/2022 6:45:51 PM by SYSTEM
                  (modified after loading)
Additional Info : Peak(s) manually integrated
  
```

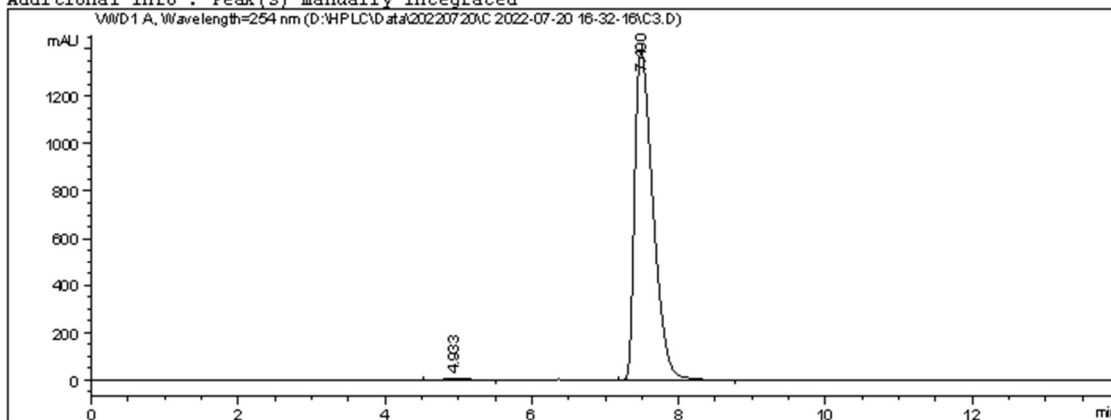

=====  
 Area Percent Report  
 =====

```

Sorted By      :      Signal
Multiplier     :      1.0000
Dilution      :      1.0000
Do not use Multiplier & Dilution Factor with ISTDs
  
```

Signal 1: VWD1 A, Wavelength=254 nm

| Peak # | RetTime [min] | Type | Width [min] | Area [mAU*s] | Height [mAU] | Area %  |
|--------|---------------|------|-------------|--------------|--------------|---------|
| 1      | 4.933         | BB   | 0.2780      | 166.63431    | 9.12553      | 0.6844  |
| 2      | 7.490         | BB   | 0.2667      | 2.41814e4    | 1391.77112   | 99.3156 |

Totals :                                    2.43461e4  1400.89665

=====  
 \*\*\* End of Report \*\*\*

# HPLC chromatogram of compound (rac)-3d

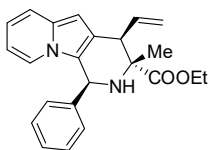

(1S,3R,4R)-3d

Data File D:\LC\DATA\ZBK\ZBK-3-83-2 2021-06-09 09-44-58\ZBK-3-83-21.D  
 Sample Name: ZBK-3-83RAC

```

=====
Acq. Operator   : 系统                               Seq. Line :    2
Sample Operator : 系统
Acq. Instrument : 1200                               Location  :    1
Injection Date  : 6/9/2021 9:56:56 AM                Inj       :    1
                                                    Inj Volume: 5.000 µl
Acq. Method    : D:\LC\DATA\ZBK\ZBK-3-83-2 2021-06-09 09-44-58\P1-AD-H-95-5-254NM-1ML-5ul-30min.M
Last changed   : 6/9/2021 10:21:37 AM by 系统
                (modified after loading)
Analysis Method : D:\LC\DATA\ZBK\ZBK-3-83-2 2021-06-09 09-44-58\P1-AD-H-95-5-254NM-1ML-5ul-30min.M (Sequence Method)
Last changed   : 7/28/2021 9:06:05 PM by 系统
                (modified after loading)
Additional Info : Peak(s) manually integrated
  
```

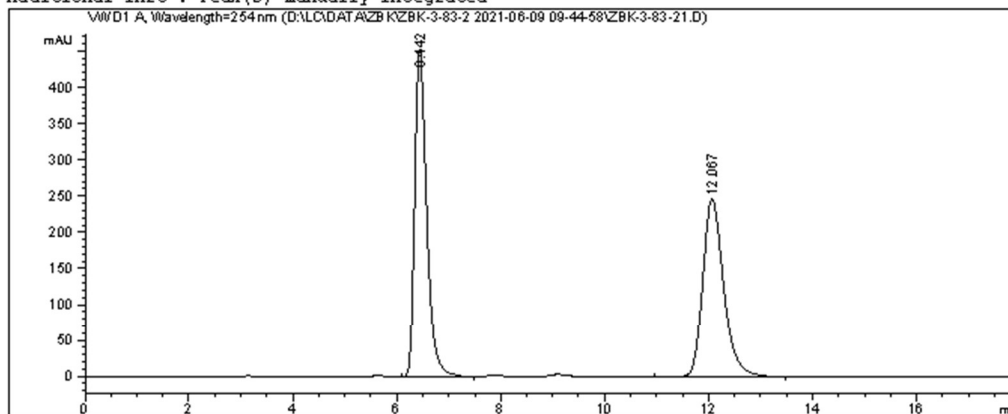

## Area Percent Report

```

Sorted By      :      Signal
Multiplier     :      1.0000
Dilution       :      1.0000
Do not use Multiplier & Dilution Factor with ISTDs
  
```

Signal 1: WVD1 A, Wavelength=254 nm

| Peak # | RetTime [min] | Type | Width [min] | Area [mAU*s] | Height [mAU] | Area %  |
|--------|---------------|------|-------------|--------------|--------------|---------|
| 1      | 6.442         | BB   | 0.2426      | 7207.07959   | 452.54630    | 51.2078 |
| 2      | 12.067        | BV R | 0.4256      | 6867.10156   | 246.37842    | 48.7922 |

Totals :                                    1.40742e4    698.92471

\*\*\* End of Report \*\*\*

# HPLC chromatogram of compound (1*S*,3*R*,4*R*)-3d



(1*S*,3*R*,4*R*)-3d

Data File D:\LC\DATA\ZBK\ZBK-3-83-3 2021-06-11 20-31-29\ZBK-3-83-3.D  
 Sample Name: ZBK-3-83R/R

```

=====
Acq. Operator   : 系统                      Seq. Line :    1
Sample Operator : 系统                      Location  :    3
Acq. Instrument : 1200                      Inj       :    1
Injection Date  : 6/11/2021 8:32:54 PM      Inj Volume: 5.000 µl
Acq. Method     : D:\LC\DATA\ZBK\ZBK-3-83-3 2021-06-11 20-31-29\P1-AD-H-95-5-254NM-1ML-5ul-30min.M
Last changed    : 6/11/2021 8:48:42 PM by 系统
                  (modified after loading)
Analysis Method : D:\LC\DATA\ZBK\ZBK-3-83-3 2021-06-11 20-31-29\P1-AD-H-95-5-254NM-1ML-5ul-30min.M (Sequence Method)
Last changed    : 7/28/2021 9:04:38 PM by 系统
                  (modified after loading)
Additional Info : Peak(s) manually integrated
  
```

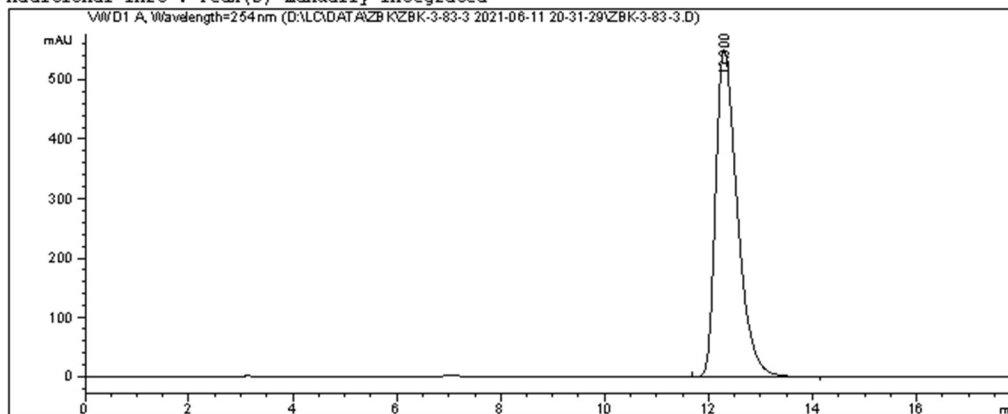

## Area Percent Report

```

Sorted By      :      Signal
Multiplier     :      1.0000
Dilution       :      1.0000
Do not use Multiplier & Dilution Factor with ISTDs
  
```

Signal 1: WVD1 A, Wavelength=254 nm

| Peak # | RetTime [min] | Type | Width [min] | Area [mAU*s] | Height [mAU] | Area %   |
|--------|---------------|------|-------------|--------------|--------------|----------|
| 1      | 12.300        | BV R | 0.4417      | 1.59170e4    | 551.32086    | 100.0000 |

Totals :                                    1.59170e4    551.32086

\*\*\* End of Report \*\*\*

# HPLC chromatogram of compound (rac)-3e

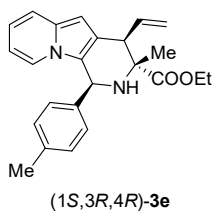

Data File D:\LC\DATA\ZBK\ZBK-2-137-136 2021-01-09 14-43-21\ZBK-2-137-1361.D  
 Sample Name: ZBK-2-137

```

=====
Acq. Operator   : 系统                               Seq. Line :    2
Sample Operator : 系统
Acq. Instrument : 1200                               Location  :   35
Injection Date  : 1/9/2021 2:55:41 PM                Inj       :    1
                                                    Inj Volume: 5.000 µl
Acq. Method     : D:\LC\DATA\ZBK\ZBK-2-137-136 2021-01-09 14-43-21\P1-AD-H-95-5-254NM-1ML-5ul
                  -30min.M
Last changed    : 12/29/2020 2:58:55 PM by 系统
Analysis Method : D:\LC\DATA\ZBK\ZBK-2-137-136 2021-01-09 14-43-21\P1-AD-H-95-5-254NM-1ML-5ul
                  -30min.M (Sequence Method)
Last changed    : 7/28/2021 5:42:13 PM by 系统
                  (modified after loading)
Additional Info : Peak(s) manually integrated
  
```

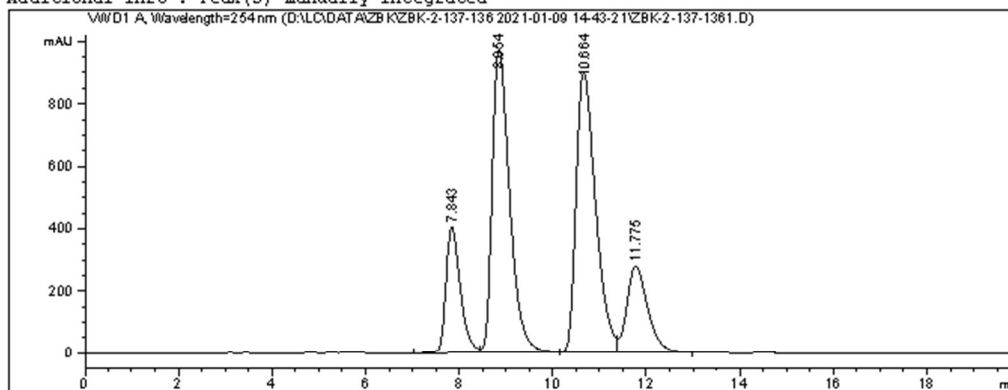

## Area Percent Report

```

Sorted By      :      Signal
Multiplier     :      1.0000
Dilution       :      1.0000
Do not use Multiplier & Dilution Factor with ISTDs
  
```

Signal 1: VWD1 A, Wavelength=254 nm

| Peak # | RetTime [min] | Type | Width [min] | Area [mAU*s] | Height [mAU] | Area %  |
|--------|---------------|------|-------------|--------------|--------------|---------|
| 1      | 7.843         | BV   | 0.3230      | 8635.95215   | 405.06708    | 12.6035 |
| 2      | 8.854         | VB   | 0.3968      | 2.51844e4    | 972.52118    | 36.7548 |
| 3      | 10.664        | BV   | 0.4480      | 2.60665e4    | 897.74261    | 38.0421 |
| 4      | 11.775        | VB   | 0.4668      | 8633.19727   | 279.40921    | 12.5995 |

Totals :                            6.85200e4  2554.74008

\*\*\* End of Report \*\*\*

# HPLC chromatogram of compound (1S,3R,4R)-3e

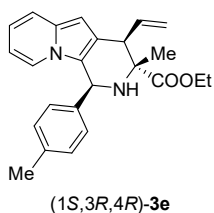

Data File D:\LC\DATA\ZBK\ZBK-2-137-136 2021-01-09 14-43-21\ZBK-2-137-1362.D  
 Sample Name: ZBK-2-136

```

=====
Acq. Operator   : 系统                               Seq. Line :    3
Sample Operator : 系统
Acq. Instrument : 1200                               Location  :   36
Injection Date  : 1/9/2021 3:26:59 PM                Inj       :    1
                                                    Inj Volume: 5.000 µl
Acq. Method     : D:\LC\DATA\ZBK\ZBK-2-137-136 2021-01-09 14-43-21\P1-AD-H-95-5-254NM-1ML-5ul
                  -30min.M
Last changed    : 12/29/2020 2:58:55 PM by 系统
Analysis Method : D:\LC\DATA\ZBK\ZBK-2-137-136 2021-01-09 14-43-21\P1-AD-H-95-5-254NM-1ML-5ul
                  -30min.M (Sequence Method)
Last changed    : 7/28/2021 7:37:11 PM by 系统
                  (modified after loading)
Additional Info : Peak(s) manually integrated
  
```

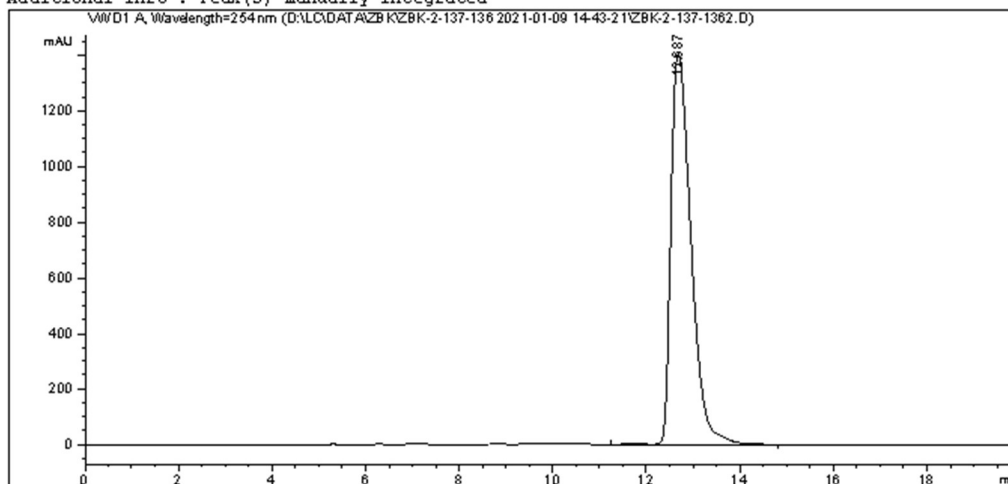

## Area Percent Report

```

Sorted By      :      Signal
Multiplier     :      1.0000
Dilution       :      1.0000
Do not use Multiplier & Dilution Factor with ISTDs
  
```

Signal 1: VWD1 A, Wavelength=254 nm

| Peak # | RetTime [min] | Type | Width [min] | Area [mAU*s] | Height [mAU] | Area %   |
|--------|---------------|------|-------------|--------------|--------------|----------|
| 1      | 12.687        | VV R | 0.4617      | 4.15618e4    | 1404.53491   | 100.0000 |

Totals :                                    4.15618e4 1404.53491

\*\*\* End of Report \*\*\*

# HPLC chromatogram of compound (rac)-3f

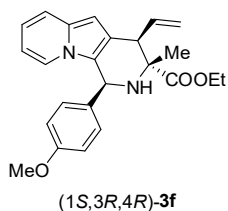

Data File D:\LC\DATA\ZBK\ZBK-2-126-5 2021-01-14 14-51-04\ZBK-2-126-52.D  
 Sample Name: ZBK-2-127S-2

```

=====
Acq. Operator   : 系统                               Seq. Line :    3
Sample Operator : 系统
Acq. Instrument : 1200                               Location  :   12
Injection Date  : 1/14/2021 3:24:38 PM                Inj       :    1
                                                    Inj Volume: 5.000 µl
Acq. Method     : D:\LC\DATA\ZBK\ZBK-2-126-5 2021-01-14 14-51-04\P1-AD-H-80-20-254MM-1ML-5UL-
                20MIN.M
Last changed    : 1/14/2021 3:42:14 PM by 系统
                (modified after loading)
Analysis Method : D:\LC\DATA\ZBK\ZBK-2-126-5 2021-01-14 14-51-04\P1-AD-H-80-20-254MM-1ML-5UL-
                20MIN.M (Sequence Method)
Last changed    : 7/28/2021 5:19:41 PM by 系统
                (modified after loading)
Additional Info : Peak(s) manually integrated
  
```

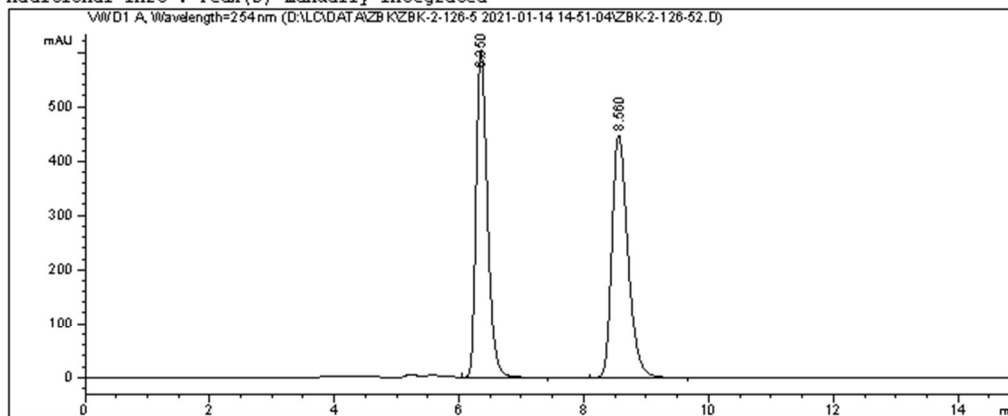

## Area Percent Report

```

Sorted By      :      Signal
Multiplier     :      1.0000
Dilution       :      1.0000
Do not use Multiplier & Dilution Factor with ISTDs
  
```

Signal 1: WWD1 A, Wavelength=254 nm

| Peak # | RetTime [min] | Type | Width [min] | Area [mAU*s] | Height [mAU] | Area %  |
|--------|---------------|------|-------------|--------------|--------------|---------|
| 1      | 6.350         | BB   | 0.1915      | 7589.51709   | 604.85889    | 48.8744 |
| 2      | 8.560         | BV R | 0.2721      | 7939.08496   | 448.34076    | 51.1256 |

Totals : 1.55286e4 1053.19965

\*\*\* End of Report \*\*\*

# HPLC chromatogram of compound (1S,3R,4R)-3f



Data File D:\LC\DATA\ZBK\ZBK-2-126-5 2021-01-14 14-51-04\ZBK-2-126-51.D  
 Sample Name: ZBK-2-126-2

```

=====
Acq. Operator   : 系统                               Seq. Line :    2
Sample Operator : 系统
Acq. Instrument : 1200                               Location  :   11
Injection Date  : 1/14/2021 3:03:23 PM              Inj       :    1
                                                    Inj Volume: 5.000 µl
Acq. Method     : D:\LC\DATA\ZBK\ZBK-2-126-5 2021-01-14 14-51-04\P1-AD-H-80-20-254NM-1ML-5UL-
                20MIN.M
Last changed    : 1/14/2021 2:49:11 PM by 系统
Analysis Method : D:\LC\DATA\ZBK\ZBK-2-126-5 2021-01-14 14-51-04\P1-AD-H-80-20-254NM-1ML-5UL-
                20MIN.M (Sequence Method)
Last changed    : 7/28/2021 5:23:43 PM by 系统
                (modified after loading)
Additional Info : Peak(s) manually integrated
  
```

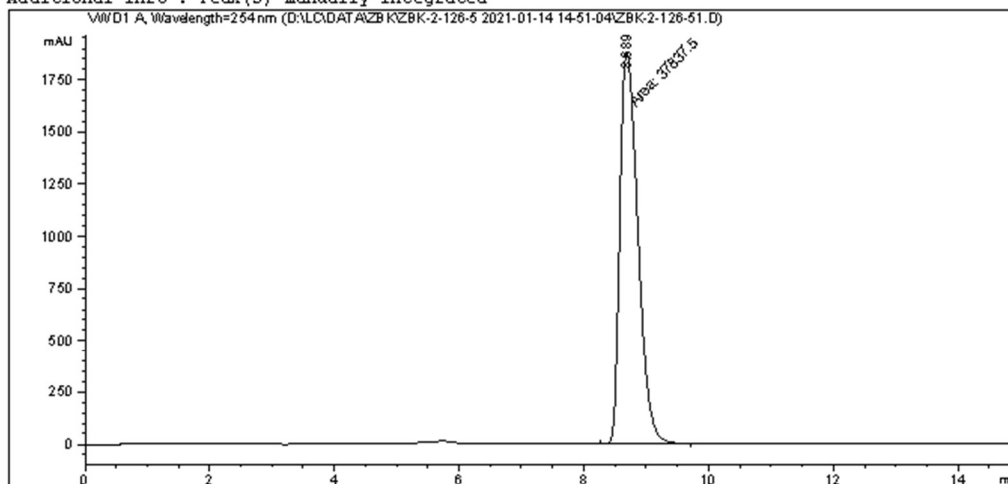

## Area Percent Report

```

Sorted By      :      Signal
Multiplier     :      1.0000
Dilution       :      1.0000
Do not use Multiplier & Dilution Factor with ISTDs
  
```

Signal 1: VWD1 A, Wavelength=254 nm

| Peak #   | RetTime [min] | Type | Width [min] | Area [mAU*s] | Height [mAU] | Area %   |
|----------|---------------|------|-------------|--------------|--------------|----------|
| 1        | 8.689         | MM   | 0.3368      | 3.78375e4    | 1872.47302   | 100.0000 |
| Totals : |               |      |             | 3.78375e4    | 1872.47302   |          |

\*\*\* End of Report \*\*\*

# HPLC chromatogram of compound (rac)-3g

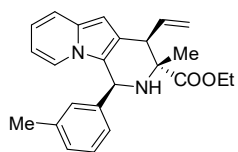

(1S,3R,4R)-3g

Data File D:\LC\DATA\ZBK\ZBK-2-126-3 2021-01-05 17-27-27\ZBK-2-126-32.D  
 Sample Name: ZBK-2-133S

```

=====
Acq. Operator   : 系统                               Seq. Line :    3
Sample Operator : 系统                               Location  :    4
Acq. Instrument : 1200                               Inj       :    1
Injection Date  : 1/5/2021 6:26:05 PM              Inj Volume: 5.000 µl
Acq. Method    : D:\LC\DATA\ZBK\ZBK-2-126-3 2021-01-05 17-27-27\PI-AD-H-95-5-254NM-1ML-5ul-30min.M
Last changed   : 12/29/2020 2:58:55 PM by 系统
Analysis Method : D:\LC\DATA\ZBK\ZBK-2-126-3 2021-01-05 17-27-27\PI-AD-H-95-5-254NM-1ML-5ul-30min.M (Sequence Method)
Last changed   : 7/28/2021 5:29:35 PM by 系统
                (modified after loading)
Additional Info : Peak(s) manually integrated
  
```

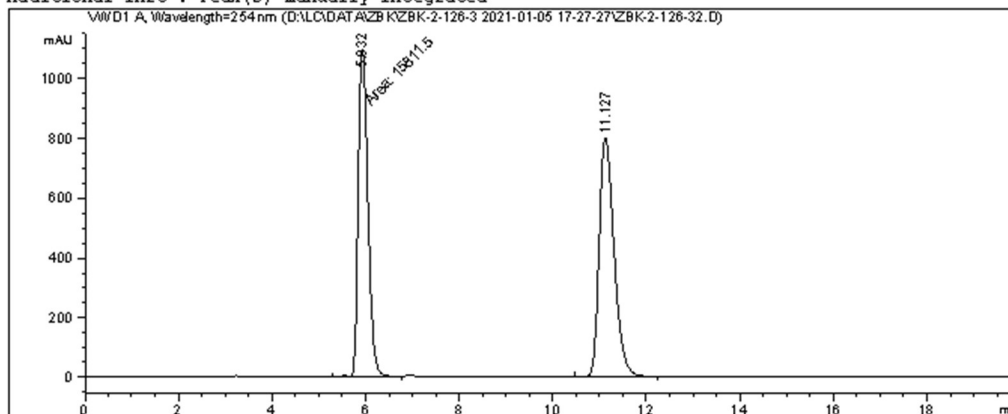

## Area Percent Report

```

Sorted By      :      Signal
Multiplier     :      1.0000
Dilution       :      1.0000
Do not use Multiplier & Dilution Factor with ISTDs
  
```

Signal 1: WWD1 A, Wavelength=254 nm

| Peak # | RetTime [min] | Type | Width [min] | Area [mAU*s] | Height [mAU] | Area %  |
|--------|---------------|------|-------------|--------------|--------------|---------|
| 1      | 5.932         | MF   | 0.2400      | 1.58115e4    | 1097.85315   | 47.1693 |
| 2      | 11.127        | BB   | 0.3420      | 1.77093e4    | 802.08563    | 52.8307 |

Totals :                                    3.35208e4 1899.93878

\*\*\* End of Report \*\*\*



# HPLC chromatogram of compound (1S,3R,4R)-3g



(1S,3R,4R)-3g

Data File D:\LC\DATA\ZBK\ZBK-2-126-3 2021-01-05 17-27-27\ZBK-2-126-33.D  
 Sample Name: ZBK-2-132

```

=====
Acq. Operator   : 系统                      Seq. Line :    4
Sample Operator : 系统
Acq. Instrument : 1200                      Location  :    5
Injection Date  : 1/5/2021 6:57:21 PM      Inj       :    1
                                           Inj Volume: 5.000 µl
Acq. Method     : D:\LC\DATA\ZBK\ZBK-2-126-3 2021-01-05 17-27-27\PI-AD-H-95-5-254NM-1ML-5ul-
                                           30min.M
Last changed    : 12/29/2020 2:58:55 PM by 系统
Analysis Method : D:\LC\DATA\ZBK\ZBK-2-126-3 2021-01-05 17-27-27\PI-AD-H-95-5-254NM-1ML-5ul-
                                           30min.M (Sequence Method)
Last changed    : 7/28/2021 5:32:07 PM by 系统
                                           (modified after loading)
Additional Info  : Peak(s) manually integrated
  
```

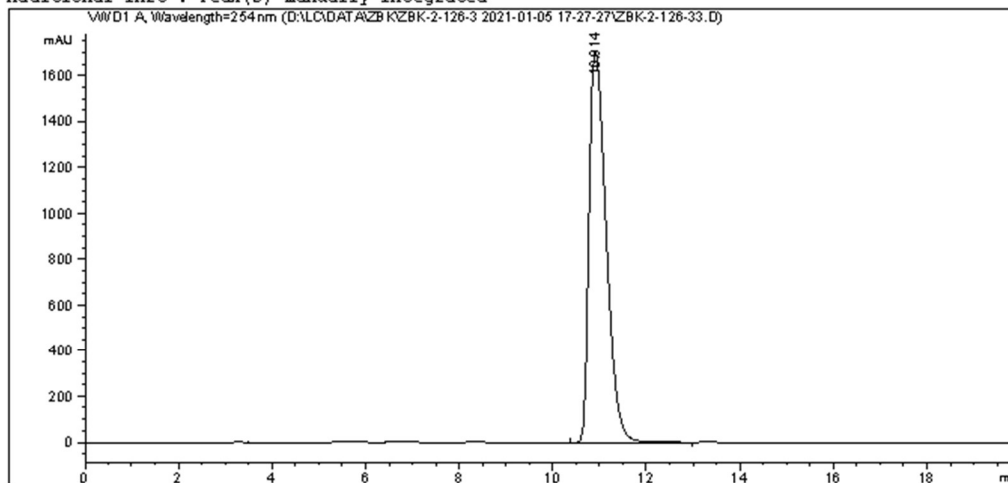

## Area Percent Report

```

Sorted By      :      Signal
Multiplier     :      1.0000
Dilution       :      1.0000
Do not use Multiplier & Dilution Factor with ISTDs
  
```

Signal 1: VWD1 A, Wavelength=254 nm

| Peak # | RetTime [min] | Type | Width [min] | Area [mAU*s] | Height [mAU] | Area %   |
|--------|---------------|------|-------------|--------------|--------------|----------|
| 1      | 10.914        | BV R | 0.3990      | 4.30796e4    | 1700.21143   | 100.0000 |

Totals :                                    4.30796e4  1700.21143

\*\*\* End of Report \*\*\*

# HPLC chromatogram of compound (rac)-3h

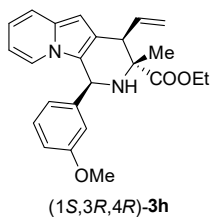

Data File D:\LC\DATA\ZBK\ZBK-2-145-2 2021-03-01 17-19-50\ZBK-2-145-21.D  
 Sample Name: ZBK-2-145-2

```

=====
Acq. Operator   : 系统                               Seq. Line :    2
Sample Operator : 系统
Acq. Instrument : 1200                               Location  :   71
Injection Date  : 3/1/2021 5:27:04 PM                Inj       :    1
                                                    Inj Volume: 5.000 µl
Acq. Method     : D:\LC\DATA\ZBK\ZBK-2-145-2 2021-03-01 17-19-50\P1-AD-H-80-20-254NM-1ML-5UL-
                20MIN.M
Last changed    : 1/14/2021 2:49:11 PM by 系统
Analysis Method : D:\LC\DATA\ZBK\ZBK-2-145-2 2021-03-01 17-19-50\P1-AD-H-80-20-254NM-1ML-5UL-
                20MIN.M (Sequence Method)
Last changed    : 7/28/2021 7:53:16 PM by 系统
                (modified after loading)
Additional Info : Peak(s) manually integrated
  
```

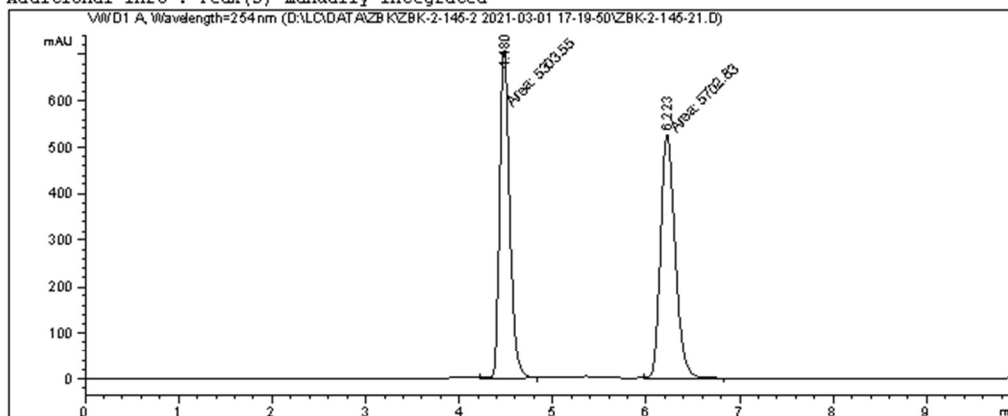

## Area Percent Report

```

Sorted By      :      Signal
Multiplier     :      1.0000
Dilution       :      1.0000
Do not use Multiplier & Dilution Factor with ISTDs
  
```

Signal 1: VWD1 A, Wavelength=254 nm

| Peak # | RetTime [min] | Type | Width [min] | Area [mAU*s] | Height [mAU] | Area %  |
|--------|---------------|------|-------------|--------------|--------------|---------|
| 1      | 4.480         | FM   | 0.1250      | 5303.54932   | 706.87036    | 48.1862 |
| 2      | 6.223         | FM   | 0.1810      | 5702.82617   | 525.23358    | 51.8138 |

Totals : 1.10064e4 1232.10394

\*\*\* End of Report \*\*\*

# HPLC chromatogram of compound (1S,3R,4R)-3h



Data File D:\LC\DATA\ZBK\ZBK-2-144-2 2021-03-01 16-34-52\ZBK-2-144-21.D  
 Sample Name: ZBK-2-144-2

```

=====
Acq. Operator   : 系统                               Seq. Line :    2
Sample Operator : 系统
Acq. Instrument : 1200                               Location  :   61
Injection Date  : 3/1/2021 4:47:14 PM                Inj       :    1
                                                    Inj Volume: 5.000 µl
Acq. Method     : D:\LC\DATA\ZBK\ZBK-2-144-2 2021-03-01 16-34-52\PI-AD-H-80-20-254NM-1ML-5UL-
                20MIN.M
Last changed    : 3/1/2021 4:56:23 PM by 系统
                (modified after loading)
Analysis Method : D:\LC\DATA\ZBK\ZBK-2-144-2 2021-03-01 16-34-52\PI-AD-H-80-20-254NM-1ML-5UL-
                20MIN.M (Sequence Method)
Last changed    : 7/28/2021 7:55:17 PM by 系统
                (modified after loading)
Additional Info : Peak(s) manually integrated
  
```

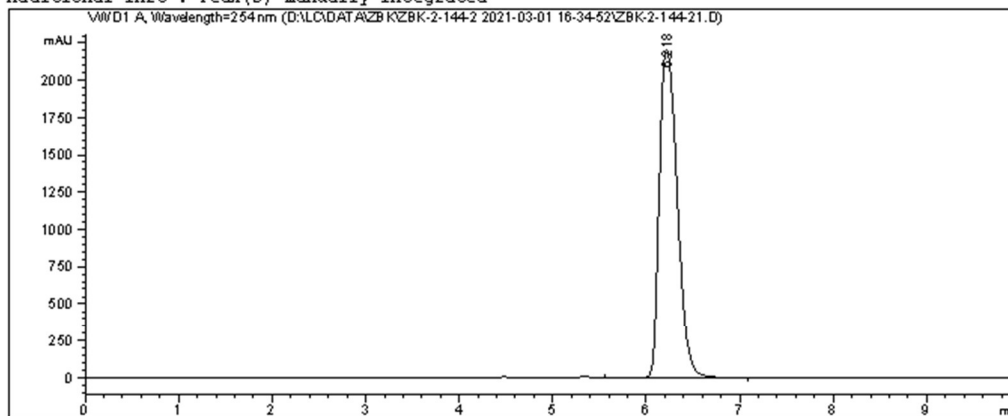

## Area Percent Report

```

Sorted By      :      Signal
Multiplier     :      1.0000
Dilution       :      1.0000
Do not use Multiplier & Dilution Factor with ISTDs
  
```

Signal 1: WWD1 A, Wavelength=254 nm

| Peak #   | RetTime [min] | Type | Width [min] | Area [mAU*s] | Height [mAU] | Area %   |
|----------|---------------|------|-------------|--------------|--------------|----------|
| 1        | 6.218         | BB   | 0.2119      | 2.92913e4    | 2203.51538   | 100.0000 |
| Totals : |               |      |             | 2.92913e4    | 2203.51538   |          |

\*\*\* End of Report \*\*\*

# HPLC chromatogram of compound (rac)-3i

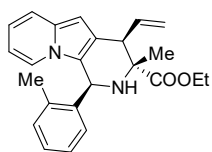

(1S,3R,4R)-3i

Data File D:\LC\DATA\ZBK\ZBK-2-154-155 2021-03-02 21-15-56\ZBK-2-154-1551.D  
 Sample Name: ZBK-2-155

```

=====
Acq. Operator   : 系统                               Seq. Line :    2
Sample Operator : 系统
Acq. Instrument : 1200                               Location  :   42
Injection Date  : 3/2/2021 9:23:15 PM                Inj       :    1
                                                    Inj Volume: 5.000 µl
Acq. Method     : D:\LC\DATA\ZBK\ZBK-2-154-155 2021-03-02 21-15-56\P1-AD-H-95-5-254NM-1ML-5ul
                  -30min.M
Last changed    : 3/2/2021 9:35:47 PM by 系统
                  (modified after loading)
Analysis Method : D:\LC\DATA\ZBK\ZBK-2-154-155 2021-03-02 21-15-56\P1-AD-H-95-5-254NM-1ML-5ul
                  -30min.M (Sequence Method)
Last changed    : 7/28/2021 8:04:57 PM by 系统
                  (modified after loading)
Additional Info : Peak(s) manually integrated
  
```

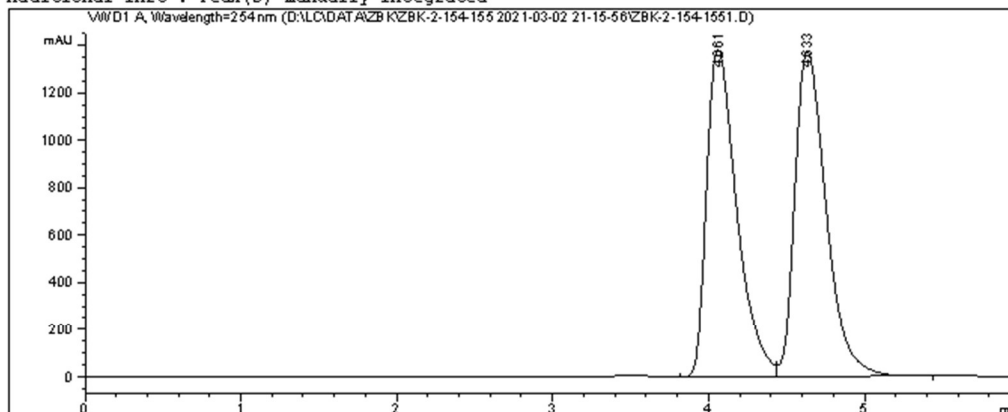

## Area Percent Report

```

Sorted By      :      Signal
Multiplier     :      1.0000
Dilution       :      1.0000
Do not use Multiplier & Dilution Factor with ISTDs
  
```

Signal 1: WVD1 A, Wavelength=254 nm

| Peak # | RetTime [min] | Type | Width [min] | Area [mAU*s] | Height [mAU] | Area %  |
|--------|---------------|------|-------------|--------------|--------------|---------|
| 1      | 4.061         | BV   | 0.2065      | 1.86251e4    | 1383.81360   | 49.3073 |
| 2      | 4.633         | VV R | 0.2163      | 1.91485e4    | 1374.99561   | 50.6927 |

Totals : 3.77736e4 2758.80920

\*\*\* End of Report \*\*\*

# HPLC chromatogram of compound (1*S*,3*R*,4*R*)-3i



(1*S*,3*R*,4*R*)-3i

Data File D:\LC\DATA\ZBK\ZBK-2-154 2021-03-03 19-26-35\ZBK-2-1541.D  
 Sample Name: ZBK-2-154

```

=====
Acq. Operator   : 系统                      Seq. Line :    2
Sample Operator : 系统
Acq. Instrument : 1200                      Location  :   61
Injection Date  : 3/3/2021 7:38:54 PM      Inj       :    1
                                           Inj Volume: 5.000 µl
Acq. Method     : D:\LC\DATA\ZBK\ZBK-2-154 2021-03-03 19-26-35\P1-AD-H-95-5-254MM-1ML-5ul-
                                           30min.M
Last changed    : 3/3/2021 8:04:55 PM by 系统
                                           (modified after loading)
Analysis Method : D:\LC\DATA\ZBK\ZBK-2-154 2021-03-03 19-26-35\P1-AD-H-95-5-254MM-1ML-5ul-
                                           30min.M (Sequence Method)
Last changed    : 7/28/2021 8:09:07 PM by 系统
                                           (modified after loading)
Additional Info : Peak(s) manually integrated
    
```

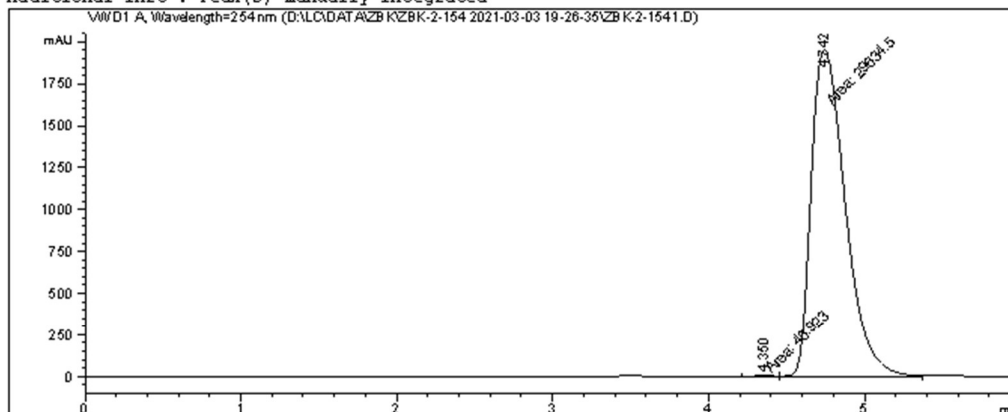

## Area Percent Report

```

Sorted By      :      Signal
Multiplier     :      1.0000
Dilution       :      1.0000
Do not use Multiplier & Dilution Factor with ISTDs
    
```

Signal 1: WVD1 A, Wavelength=254 nm

| Peak # | RetTime [min] | Type | Width [min] | Area [mAU*s] | Height [mAU] | Area %  |
|--------|---------------|------|-------------|--------------|--------------|---------|
| 1      | 4.350         | MM   | 0.1595      | 46.92297     | 4.90182      | 0.1581  |
| 2      | 4.742         | MM   | 0.2530      | 2.96345e4    | 1952.32861   | 99.8419 |

Totals :                                    2.96814e4  1957.23044

\*\*\* End of Report \*\*\*

# HPLC chromatogram of compound (rac)-3j

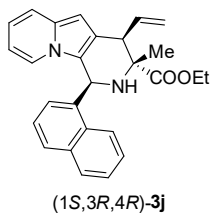

Data File D:\LC\DATA\RJD\RJD-3-90-Bn-104-hu 2021-01-11 19-32-21\RJD-3-90-Bn-104-hu9.D  
 Sample Name: ZBK-2-143S

```

=====
Acq. Operator   : 系统                               Seq. Line :   10
Sample Operator : 系统
Acq. Instrument : 1200                               Location  :   41
Injection Date  : 1/11/2021 11:14:11 PM              Inj       :    1
                                                    Inj Volume: 5.000 µl
Acq. Method     : D:\LC\DATA\RJD\RJD-3-90-Bn-104-hu 2021-01-11 19-32-21\P1-AD-H-95-5-254NM-
                  1ML-SUL-40MIN.M
Last changed    : 1/5/2021 5:23:59 PM by 系统
Analysis Method : D:\LC\DATA\RJD\RJD-3-90-Bn-104-hu 2021-01-11 19-32-21\P1-AD-H-95-5-254NM-
                  1ML-SUL-40MIN.M (Sequence Method)
Last changed    : 7/28/2021 7:48:56 PM by 系统
                  (modified after loading)
Additional Info : Peak(s) manually integrated
  
```

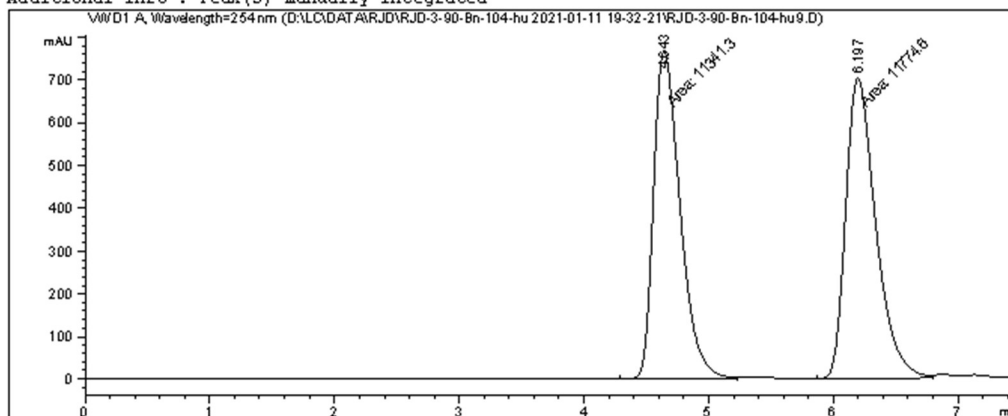

## Area Percent Report

```

Sorted By      :      Signal
Multiplier     :      1.0000
Dilution       :      1.0000
Do not use Multiplier & Dilution Factor with ISTDs
  
```

Signal 1: VWD1 A, Wavelength=254 nm

| Peak # | RetTime [min] | Type | Width [min] | Area [mAU*s] | Height [mAU] | Area %  |
|--------|---------------|------|-------------|--------------|--------------|---------|
| 1      | 4.643         | MF   | 0.2459      | 1.13413e4    | 768.53619    | 49.0627 |
| 2      | 6.197         | MF   | 0.2787      | 1.17746e4    | 704.12799    | 50.9373 |

Totals : 2.31159e4 1472.66418

\*\*\* End of Report \*\*\*

# HPLC chromatogram of compound (1*S*,3*R*,4*R*)-3j



Data File D:\LC\DATA\RJD\RJD-3-90-Bn-104-hu 2021-01-11 19-32-21\RJD-3-90-Bn-104-hu12.D  
 Sample Name: ZBK-2-142

```

=====
Acq. Operator   : 系统                               Seq. Line :   13
Sample Operator : 系统
Acq. Instrument : 1200                               Location  :   43
Injection Date  : 1/12/2021 12:47:40 AM              Inj       :    1
                                                    Inj Volume: 5.000 µl
Acq. Method     : D:\LC\DATA\RJD\RJD-3-90-Bn-104-hu 2021-01-11 19-32-21\P1-AD-H-95-5-254NM-
                  1ML-SUL-40MIN.M
Last changed    : 1/5/2021 5:23:59 PM by 系统
Analysis Method : D:\LC\DATA\RJD\RJD-3-90-Bn-104-hu 2021-01-11 19-32-21\P1-AD-H-95-5-254NM-
                  1ML-SUL-40MIN.M (Sequence Method)
Last changed    : 7/28/2021 7:47:07 PM by 系统
                  (modified after loading)
Additional Info : Peak(s) manually integrated
  
```

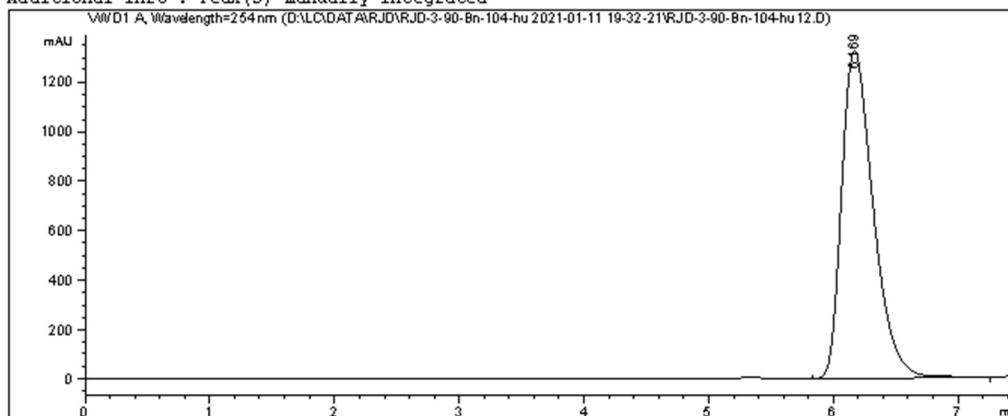

## Area Percent Report

```

Sorted By      :      Signal
Multiplier     :      1.0000
Dilution       :      1.0000
Do not use Multiplier & Dilution Factor with ISTDs
  
```

Signal 1: WVD1 A, Wavelength=254 nm

| Peak # | RetTime [min] | Type | Width [min] | Area [mAU*s] | Height [mAU] | Area %   |
|--------|---------------|------|-------------|--------------|--------------|----------|
| 1      | 6.169         | BV R | 0.2724      | 2.34652e4    | 1326.30554   | 100.0000 |

Totals :                    2.34652e4 1326.30554

\*\*\* End of Report \*\*\*

# HPLC chromatogram of compound (rac)-3k

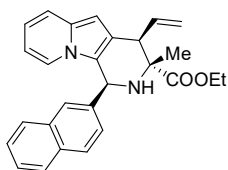

(1S,3R,4R)-3k

Data File E:\DATA\ZBK\ZBK-2-141RAC-2 2021-01-16 21-44-26\ZBK-2-141RAC-2.D  
 Sample Name: ZBK-2-141RAC

```

=====
Acq. Operator   : SYSTEM                      Seq. Line :    1
Acq. Instrument : 1260                          Location  :   31
Injection Date  : 1/16/2021 9:45:56 PM        Inj       :    1
                                           Inj Volume: 5.000 µl
Acq. Method     : E:\DATA\ZBK\ZBK-2-141RAC-2 2021-01-16 21-44-26\4-IE--95-5-1ML-20MIN-5UL-
                  254NM-DAD.M
Last changed    : 1/16/2021 9:57:24 PM by SYSTEM
                  (modified after loading)
Analysis Method : E:\DATA\ZBK\ZBK-2-141RAC-2 2021-01-16 21-44-26\4-IE--95-5-1ML-20MIN-5UL-
                  254NM-DAD.M (Sequence Method)
Last changed    : 7/29/2021 3:15:33 PM by SYSTEM
                  (modified after loading)
  
```

Additional Info : Peak(s) manually integrated

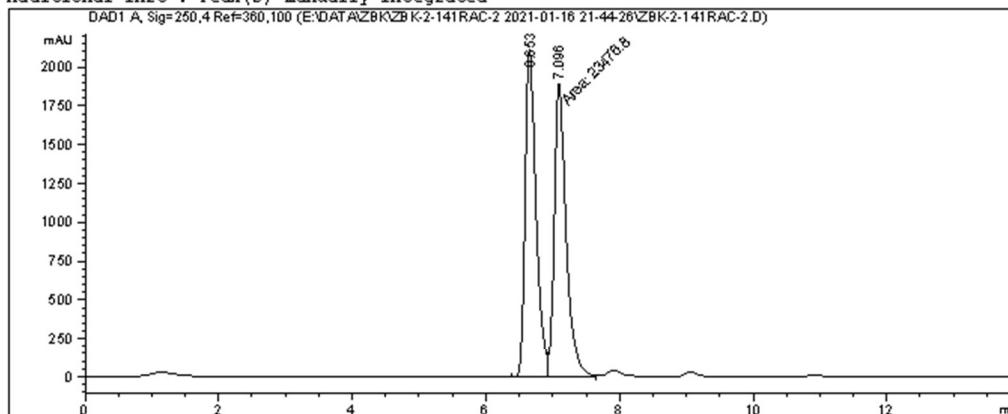

## Area Percent Report

```

Sorted By      :      Signal
Multiplier     :      1.0000
Dilution       :      1.0000
Do not use Multiplier & Dilution Factor with ISTDs
  
```

Signal 1: DAD1 A, Sig=250,4 Ref=360,100

| Peak # | RetTime [min] | Type | Width [min] | Area [mAU*s] | Height [mAU] | Area %  |
|--------|---------------|------|-------------|--------------|--------------|---------|
| 1      | 6.653         | BV   | 0.1727      | 2.40373e4    | 2113.82666   | 50.5897 |
| 2      | 7.096         | MF   | 0.2064      | 2.34768e4    | 1896.09497   | 49.4103 |

Totals : 4.75141e4 4009.92163

\*\*\* End of Report \*\*\*



# HPLC chromatogram of compound (1*S*,3*R*,4*R*)-3k



(1*S*,3*R*,4*R*)-3k

Data File E:\DATA\ZBK\ZBK-2-140 2021-03-04 19-02-06\ZBK-2-1401.D  
 Sample Name: ZBK-2-140

```

=====
Acq. Operator   : SYSTEM                      Seq. Line :    2
Acq. Instrument : 1260                        Location  :   63
Injection Date  : 3/4/2021 7:15:06 PM        Inj       :    1
                                           Inj Volume: 5.000 µl
Acq. Method     : E:\DATA\ZBK\ZBK-2-140 2021-03-04 19-02-06\4-IE--95-5-1ML-20MIN-SUL-254NM-DAD.M
Last changed    : 3/4/2021 7:02:06 PM by SYSTEM
Analysis Method : E:\DATA\ZBK\ZBK-2-140 2021-03-04 19-02-06\4-IE--95-5-1ML-20MIN-SUL-254NM-DAD.M (Sequence Method)
Last changed    : 7/29/2021 3:19:20 PM by SYSTEM
                 (modified after loading)
Additional Info  : Peak(s) manually integrated
  
```

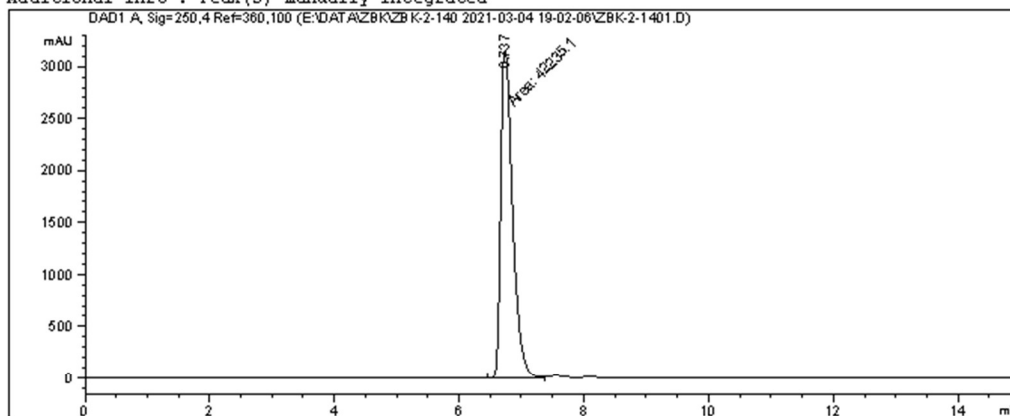

## Area Percent Report

```

Sorted By      : Signal
Multiplier     : 1.0000
Dilution       : 1.0000
Do not use Multiplier & Dilution Factor with ISTDs
  
```

Signal 1: DAD1 A, Sig=250,4 Ref=360,100

| Peak # | RetTime [min] | Type | Width [min] | Area [mAU*s] | Height [mAU] | Area %   |
|--------|---------------|------|-------------|--------------|--------------|----------|
| 1      | 6.737         | MF   | 0.2229      | 4.22351e4    | 3157.52173   | 100.0000 |

Totals :                    4.22351e4 3157.52173

\*\*\* End of Report \*\*\*

# HPLC chromatogram of compound (1R,3S,4S)-3k

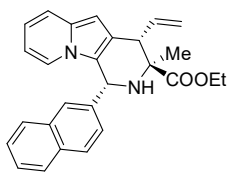

(1R,3S,4S)-3k

Data File E:\DATA\ZBK\ZBK-2-135-2 2021-01-15 19-28-46\ZBK-2-135-27.D  
 Sample Name: ZBK-2-140S,Sp

```

=====
Acq. Operator   : SYSTEM                      Seq. Line :    8
Acq. Instrument : 1260                        Location  :   44
Injection Date  : 1/15/2021 9:40:30 PM       Inj       :    1
                                           Inj Volume: 5.000 µl
Acq. Method     : E:\DATA\ZBK\ZBK-2-135-2 2021-01-15 19-28-46\4-IE--95-5-1ML-20MIN-5UL-254NM-
                  DAD.M
Last changed    : 1/15/2021 8:37:56 PM by SYSTEM
Analysis Method : E:\DATA\ZBK\ZBK-2-135-2 2021-01-15 19-28-46\4-IE--95-5-1ML-20MIN-5UL-254NM-
                  DAD.M (Sequence Method)
Last changed    : 7/29/2021 3:30:53 PM by SYSTEM
                  (modified after loading)
Additional Info  : Peak(s) manually integrated
    
```

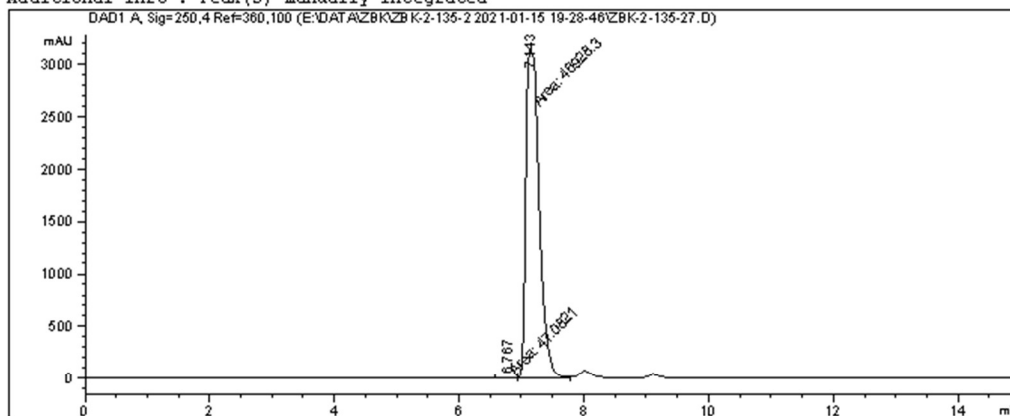

## Area Percent Report

```

Sorted By       : Signal
Multiplier      : 1.0000
Dilution        : 1.0000
Do not use Multiplier & Dilution Factor with ISTDs
    
```

Signal 1: DAD1 A, Sig=250,4 Ref=360,100

| Peak # | RetTime [min] | Type | Width [min] | Area [mAU*s] | Height [mAU] | Area %  |
|--------|---------------|------|-------------|--------------|--------------|---------|
| 1      | 6.767         | MF   | 0.1821      | 47.08208     | 4.30997      | 0.1002  |
| 2      | 7.143         | FM   | 0.2495      | 4.69283e4    | 3134.67456   | 99.8998 |

Totals :                                    4.69754e4  3138.98453

\*\*\* End of Report \*\*\*

# HPLC chromatogram of compound (rac)-3k

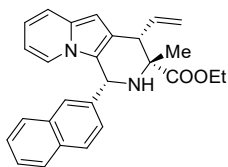

(1R,3R,4S)-3k

Data File E:\DATA\ZBK\ZBK-3-88-5 2021-06-19 09-59-52\ZBK-3-88-5.D  
 Sample Name: ZBK-3-88RAC

```

=====
Acq. Operator   : SYSTEM                      Seq. Line :    1
Acq. Instrument : 1260                        Location  :   72
Injection Date  : 6/19/2021 10:01:11 AM      Inj       :    1
                                           Inj Volume: 5.000 µl

Acq. Method     : E:\DATA\ZBK\ZBK-3-88-5 2021-06-19 09-59-52\IE-95-5-254NM-0.5ML-40MIN.M
Last changed    : 6/19/2021 10:01:21 AM by SYSTEM
                  (modified after loading)

Analysis Method : E:\DATA\ZBK\ZBK-3-88-5 2021-06-19 09-59-52\IE-95-5-254NM-0.5ML-40MIN.M (
Sequence Method)
Last changed    : 7/29/2021 3:46:19 PM by SYSTEM
                  (modified after loading)

Additional Info : Peak(s) manually integrated
  
```

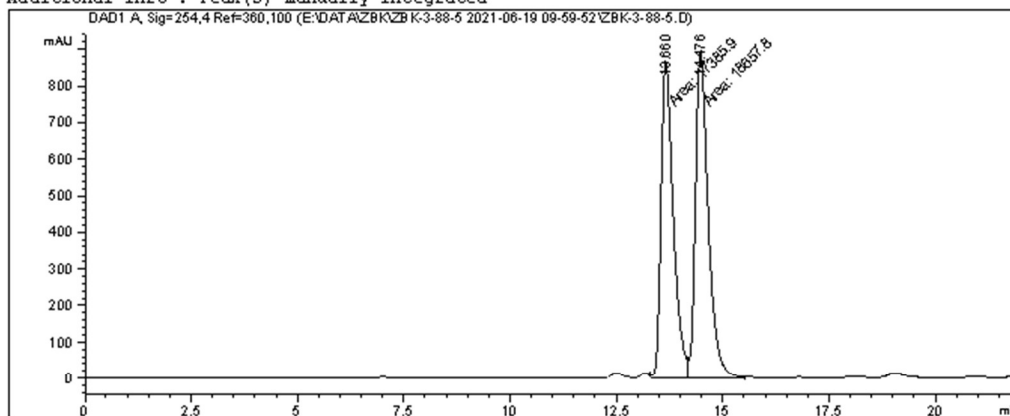

## Area Percent Report

```

Sorted By      : Signal
Multiplier     : 1.0000
Dilution       : 1.0000
Do not use Multiplier & Dilution Factor with ISTDs
  
```

Signal 1: DAD1 A, Sig=254,4 Ref=360,100

| Peak # | RetTime [min] | Type | Width [min] | Area [mAU*s] | Height [mAU] | Area %  |
|--------|---------------|------|-------------|--------------|--------------|---------|
| 1      | 13.660        | FM   | 0.3342      | 1.73859e4    | 866.98480    | 48.2357 |
| 2      | 14.476        | MF   | 0.3470      | 1.86578e4    | 896.11237    | 51.7643 |

Totals : 3.60437e4 1763.09717

\*\*\* End of Report \*\*\*

# HPLC chromatogram of compound (1R,3R,4S)-3k

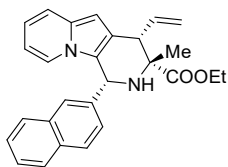

(1R,3R,4S)-3k

Data File E:\DATA\ZBK\ZBK-3-88-5 2021-06-19 09-59-52\ZBK-3-88-52.D  
 Sample Name: ZBK-3-88R/S

```

=====
Acq. Operator   : SYSTEM                      Seq. Line :    3
Acq. Instrument : 1260                        Location  :   51
Injection Date  : 6/19/2021 10:50:03 AM      Inj       :    1
                                           Inj Volume: 5.000 µl

Acq. Method     : E:\DATA\ZBK\ZBK-3-88-5 2021-06-19 09-59-52\IE-95-5-254NM-0.5ML-40MIN.M
Last changed    : 6/19/2021 10:01:21 AM by SYSTEM
Analysis Method : E:\DATA\ZBK\ZBK-3-88-5 2021-06-19 09-59-52\IE-95-5-254NM-0.5ML-40MIN.M (
                  Sequence Method)
Last changed    : 7/29/2021 3:48:07 PM by SYSTEM
                  (modified after loading)

Additional Info : Peak(s) manually integrated
  
```

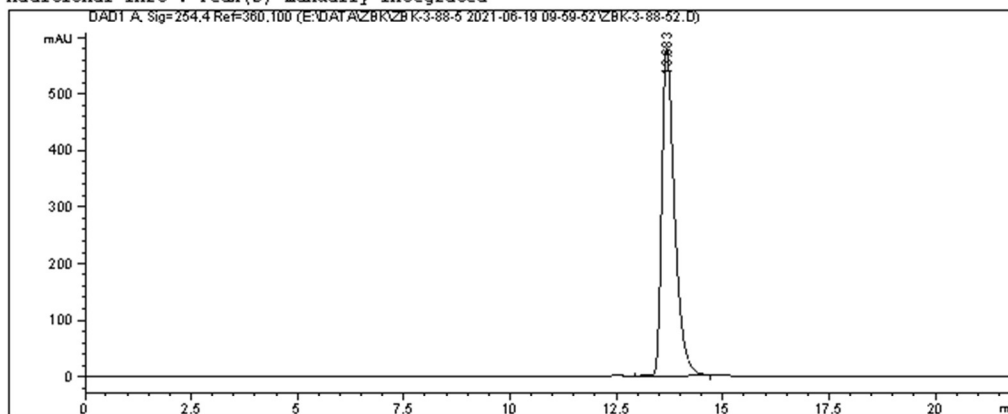

## Area Percent Report

```

Sorted By      : Signal
Multiplier     : 1.0000
Dilution       : 1.0000
Do not use Multiplier & Dilution Factor with ISTDs
  
```

Signal 1: DAD1 A, Sig=254,4 Ref=360,100

| Peak # | RetTime [min] | Type | Width [min] | Area [mAU*s] | Height [mAU] | Area %   |
|--------|---------------|------|-------------|--------------|--------------|----------|
| 1      | 13.683        | VB R | 0.3197      | 1.22386e4    | 579.28882    | 100.0000 |

Totals : 1.22386e4 579.28882

\*\*\* End of Report \*\*\*

# HPLC chromatogram of compound (1*S*,3*S*,4*R*)-3k

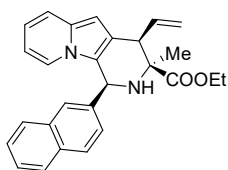

(1*S*,3*S*,4*R*)-3k

Data File E:\DATA\ZBK\ZBK-3-88-5 2021-06-19 09-59-52\ZBK-3-88-51.D  
 Sample Name: ZBK-3-88S/R

```

=====
Acq. Operator   : SYSTEM                      Seq. Line :    2
Acq. Instrument : 1260                        Location  :   52
Injection Date  : 6/19/2021 10:25:35 AM      Inj       :    1
                                           Inj Volume: 5.000 µl

Acq. Method     : E:\DATA\ZBK\ZBK-3-88-5 2021-06-19 09-59-52\IE-95-5-254NM-0.5ML-40MIN.M
Last changed    : 6/19/2021 10:01:21 AM by SYSTEM
Analysis Method : E:\DATA\ZBK\ZBK-3-88-5 2021-06-19 09-59-52\IE-95-5-254NM-0.5ML-40MIN.M (
                  Sequence Method)
Last changed    : 7/29/2021 3:48:07 PM by SYSTEM
                  (modified after loading)

Additional Info : Peak(s) manually integrated
  
```

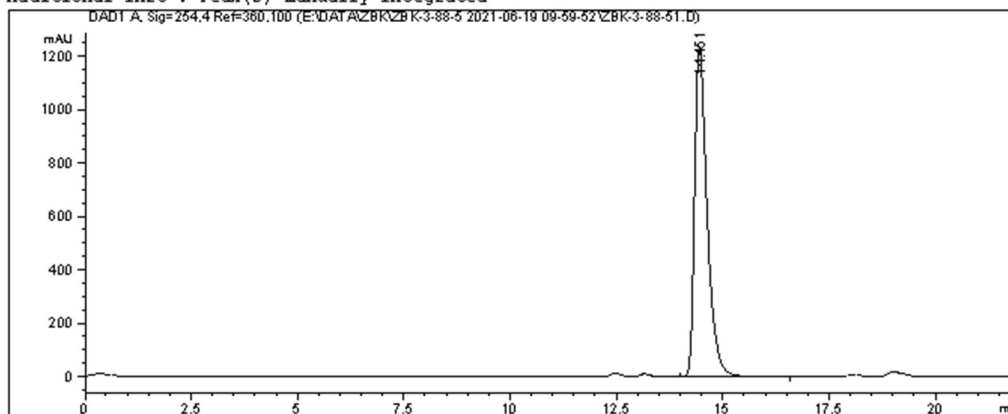

## Area Percent Report

```

Sorted By      : Signal
Multiplier     : 1.0000
Dilution       : 1.0000
Do not use Multiplier & Dilution Factor with ISTDs
  
```

Signal 1: DAD1 A, Sig=254,4 Ref=360,100

| Peak # | RetTime [min] | Type | Width [min] | Area [mAU*s] | Height [mAU] | Area %   |
|--------|---------------|------|-------------|--------------|--------------|----------|
| 1      | 14.451        | BB   | 0.3092      | 2.52099e4    | 1229.79907   | 100.0000 |

Totals : 2.52099e4 1229.79907

\*\*\* End of Report \*\*\*

# HPLC chromatogram of compound (rac)-3I

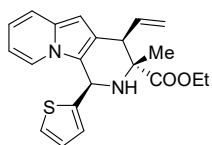

(1S,3R,4R)-3I

Data File D:\LC\DATA\ZBK\ZBK-3-5 2021-03-10 16-33-58\ZBK-3-51.D  
 Sample Name: ZBK-3-5S

```

=====
Acq. Operator   : 系统                      Seq. Line :    2
Sample Operator : 系统
Acq. Instrument : 1200                      Location  :    1
Injection Date  : 3/10/2021 4:46:15 PM      Inj       :    1
                                           Inj Volume: 5.000 µl
Acq. Method    : D:\LC\DATA\ZBK\ZBK-3-5 2021-03-10 16-33-58\P1-AD-H-95-5-254NM-1ML-5ul-30min
                                           .M
Last changed   : 3/10/2021 5:02:20 PM by 系统
                                           (modified after loading)
Analysis Method: D:\LC\DATA\ZBK\ZBK-3-5 2021-03-10 16-33-58\P1-AD-H-95-5-254NM-1ML-5ul-30min
                                           .M (Sequence Method)
Last changed   : 7/28/2021 8:13:00 PM by 系统
                                           (modified after loading)
Additional Info: Peak(s) manually integrated
    
```

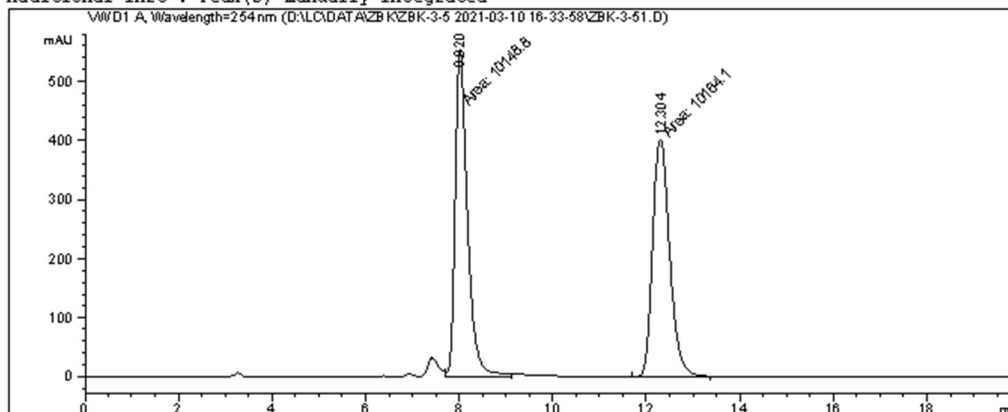

## Area Percent Report

```

Sorted By      :      Signal
Multiplier     :      1.0000
Dilution       :      1.0000
Do not use Multiplier & Dilution Factor with ISTDs
    
```

Signal 1: WVD1 A, Wavelength=254 nm

| Peak # | RetTime [min] | Type | Width [min] | Area [mAU*s] | Height [mAU] | Area %  |
|--------|---------------|------|-------------|--------------|--------------|---------|
| 1      | 8.020         | MM   | 0.3047      | 1.01488e4    | 555.21069    | 49.9624 |
| 2      | 12.304        | MF   | 0.4219      | 1.01641e4    | 401.52850    | 50.0376 |

Totals :                                    2.03129e4    956.73920

\*\*\* End of Report \*\*\*

# HPLC chromatogram of compound (1S,3R,4R)-3I



(1S,3R,4R)-3I

Data File D:\LC\DATA\ZBK\ZBK-3-4 2021-03-10 22-10-52\ZBK-3-41.D  
 Sample Name: ZBK-3-4

```

=====
Acq. Operator   : 系统                      Seq. Line :    2
Sample Operator : 系统
Acq. Instrument : 1200                      Location  :    4
Injection Date  : 3/10/2021 10:23:10 PM      Inj       :    1
                                           Inj Volume: 5.000 µl
Acq. Method     : D:\LC\DATA\ZBK\ZBK-3-4 2021-03-10 22-10-52\P1-AD-H-95-5-254NM-1ML-5ul-30min
                                           .M
Last changed    : 12/29/2020 2:58:55 PM by 系统
Analysis Method : D:\LC\DATA\ZBK\ZBK-3-4 2021-03-10 22-10-52\P1-AD-H-95-5-254NM-1ML-5ul-30min
                                           .M (Sequence Method)
Last changed    : 7/28/2021 8:15:04 PM by 系统
                                           (modified after loading)
  
```

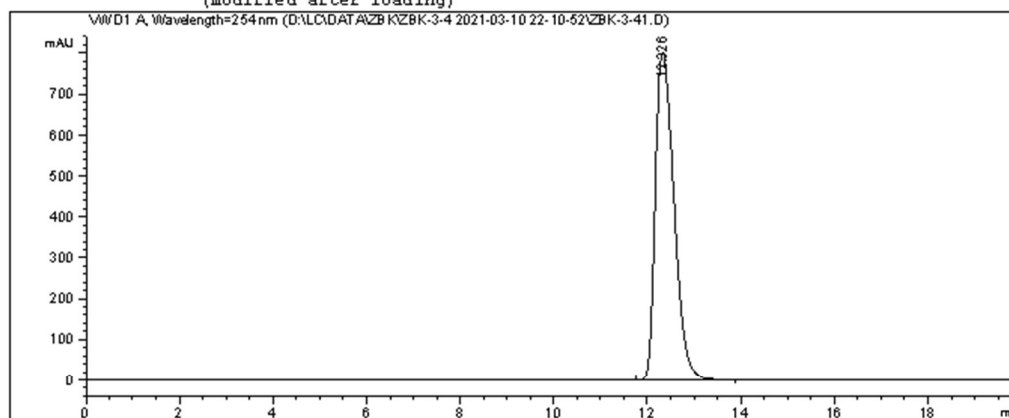

## Area Percent Report

```

Sorted By      :      Signal
Multiplier     :      1.0000
Dilution       :      1.0000
Do not use Multiplier & Dilution Factor with ISTDs
  
```

Signal 1: WVD1 A, Wavelength=254 nm

| Peak # | RetTime [min] | Type | Width [min] | Area [mAU*s] | Height [mAU] | Area %   |
|--------|---------------|------|-------------|--------------|--------------|----------|
| 1      | 12.326        | BB   | 0.4431      | 2.22550e4    | 802.03363    | 100.0000 |

Totals :                    2.22550e4   802.03363

\*\*\* End of Report \*\*\*

# HPLC chromatogram of compound (rac)-3m

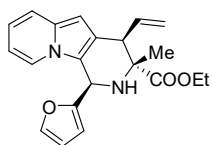

(1S,3R,4R)-3m

Data File D:\LC\DATA\ZBK\ZBK-3-46RAC-2 2021-04-22 20-32-28\ZBK-3-46RAC-2.D  
 Sample Name: ZBK-3-46RAC

```

=====
Acq. Operator   : 系统                               Seq. Line :    1
Sample Operator : 系统                               Location  :   73
Acq. Instrument : 1200                               Inj       :    1
Injection Date  : 4/22/2021 8:33:51 PM              Inj Volume: 5.000 µl
Acq. Method    : D:\LC\DATA\ZBK\ZBK-3-46RAC-2 2021-04-22 20-32-28\P1-AD-H-80-20-254NM-1ML-
                    SUL-20MIN.M
Last changed   : 1/14/2021 2:49:11 PM by 系统
Analysis Method : D:\LC\DATA\ZBK\ZBK-3-46RAC-2 2021-04-22 20-32-28\P1-AD-H-80-20-254NM-1ML-
                    SUL-20MIN.M (Sequence Method)
Last changed   : 7/28/2021 8:38:00 PM by 系统
                    (modified after loading)
Additional Info : Peak(s) manually integrated
  
```

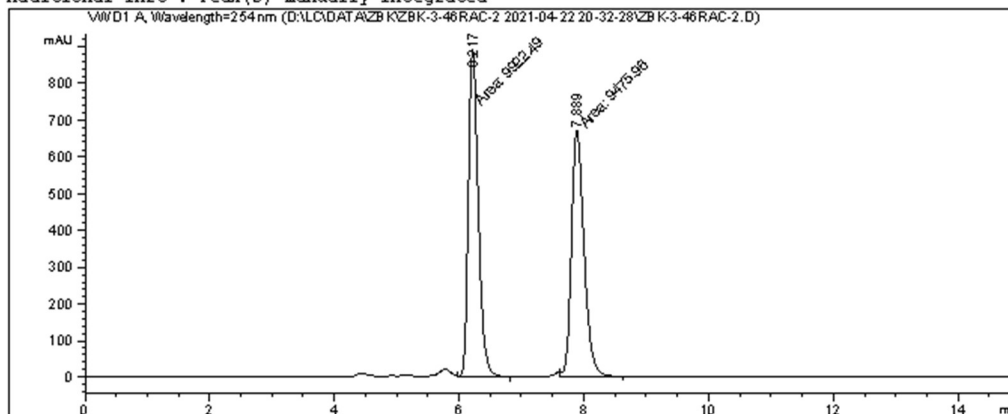

## Area Percent Report

```

Sorted By      :      Signal
Multiplier     :      1.0000
Dilution       :      1.0000
Do not use Multiplier & Dilution Factor with ISTDs
  
```

Signal 1: VWD1 A, Wavelength=254 nm

| Peak # | RetTime [min] | Type | Width [min] | Area [mAU*s] | Height [mAU] | Area %  |
|--------|---------------|------|-------------|--------------|--------------|---------|
| 1      | 6.217         | MM   | 0.1852      | 9922.48828   | 892.89410    | 51.1509 |
| 2      | 7.889         | MF   | 0.2354      | 9475.95898   | 670.79712    | 48.8491 |

Totals : 1.93984e4 1563.69122

\*\*\* End of Report \*\*\*



# HPLC chromatogram of compound (1S,3R,4R)-3m



(1S,3R,4R)-3m

Data File D:\LC\DATA\ZBK\ZBK-3-46-2 2021-04-22 17-26-29\ZBK-3-46-21.D  
 Sample Name: ZBK-3-46R-2

```

=====
Acq. Operator   : 系统                      Seq. Line :    2
Sample Operator : 系统
Acq. Instrument : 1200                      Location  :   73
Injection Date  : 4/22/2021 5:38:36 PM      Inj       :    1
                                           Inj Volume: 5.000 µl
Acq. Method     : D:\LC\DATA\ZBK\ZBK-3-46-2 2021-04-22 17-26-29\P1-AD-H-80-20-254NM-1ML-5UL-
                20MIN.M
Last changed    : 1/14/2021 2:49:11 PM by 系统
Analysis Method : D:\LC\DATA\ZBK\ZBK-3-46-2 2021-04-22 17-26-29\P1-AD-H-80-20-254NM-1ML-5UL-
                20MIN.M (Sequence Method)
Last changed    : 7/28/2021 8:41:07 PM by 系统
                (modified after loading)
Additional Info : Peak(s) manually integrated
    
```

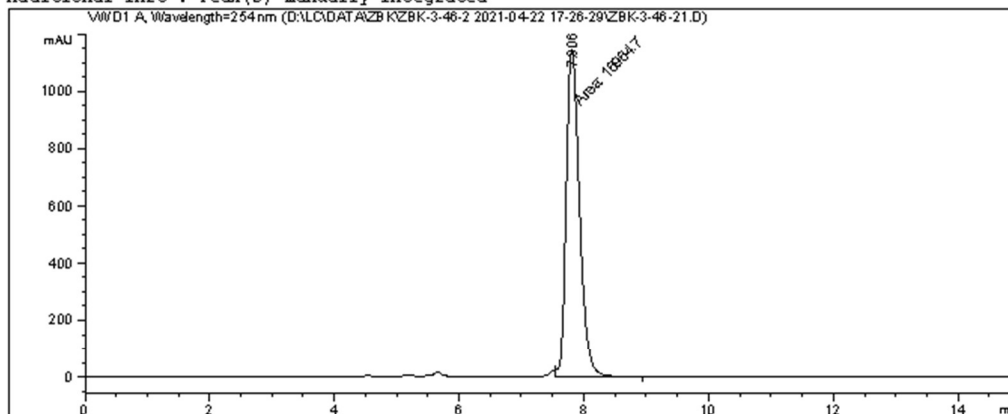

## Area Percent Report

```

=====
Sorted By      :      Signal
Multiplier     :      1.0000
Dilution       :      1.0000
Do not use Multiplier & Dilution Factor with ISTDs
    
```

Signal 1: WVD1 A, Wavelength=254 nm

| Peak # | RetTime [min] | Type | Width [min] | Area [mAU*s] | Height [mAU] | Area %   |
|--------|---------------|------|-------------|--------------|--------------|----------|
| 1      | 7.806         | FM   | 0.2469      | 1.69647e4    | 1145.33398   | 100.0000 |

Totals :                    1.69647e4  1145.33398

\*\*\* End of Report \*\*\*

# HPLC chromatogram of compound (rac)-3n

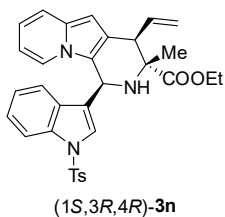

Data File D:\LC\DATA\ZBK\ZBK-3-61 2021-05-17 22-01-38\ZBK-3-61.D  
 Sample Name: ZBK-3-61RAC

```

=====
Acq. Operator   : 系统                               Seq. Line :    1
Sample Operator : 系统
Acq. Instrument : 1200                               Location  :   23
Injection Date  : 5/17/2021 10:02:53 PM             Inj       :    1
                                                    Inj Volume: 5.000 µl
Acq. Method     : D:\LC\DATA\ZBK\ZBK-3-61 2021-05-17 22-01-38\P1-80-20-254NM-1ML-5ul-45min.M
Last changed    : 5/17/2021 10:24:39 PM by 系统
                  (modified after loading)
Analysis Method : D:\LC\DATA\ZBK\ZBK-3-61 2021-05-17 22-01-38\P1-80-20-254NM-1ML-5ul-45min.M
                  (Sequence Method)
Last changed    : 7/28/2021 8:57:35 PM by 系统
                  (modified after loading)
Additional Info : Peak(s) manually integrated
  
```

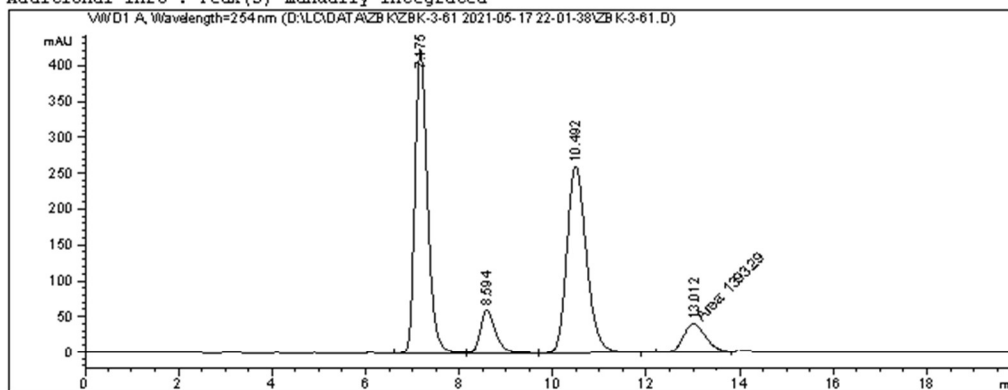

## Area Percent Report

```

Sorted By      :      Signal
Multiplier     :      1.0000
Dilution       :      1.0000
Do not use Multiplier & Dilution Factor with ISTDs
  
```

Signal 1: VWD1 A, Wavelength=254 nm

| Peak # | RetTime [min] | Type | Width [min] | Area [mAU*s] | Height [mAU] | Area %  |
|--------|---------------|------|-------------|--------------|--------------|---------|
| 1      | 7.175         | BV   | 0.2840      | 7830.61865   | 423.75073    | 43.1738 |
| 2      | 8.594         | VV R | 0.3400      | 1339.46570   | 60.12615     | 7.3851  |
| 3      | 10.492        | VV R | 0.4478      | 7574.04102   | 260.99268    | 41.7592 |
| 4      | 13.012        | MF   | 0.5674      | 1393.29395   | 40.92601     | 7.6819  |

Totals : 1.81374e4 785.79556

\*\*\* End of Report \*\*\*

# HPLC chromatogram of compound (1S,3R,4R)-3n

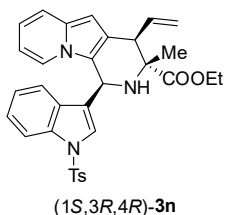

Data File D:\LC\DATA\ZBK\ZBK-3-61 2021-05-17 22-01-38\ZBK-3-611.D  
 Sample Name: ZBK-3-610PT

```

=====
Acq. Operator   : 系统                               Seq. Line :    2
Sample Operator : 系统
Acq. Instrument : 1200                               Location  :   11
Injection Date  : 5/17/2021 10:26:06 PM             Inj       :    1
                                                    Inj Volume: 5.000 µl
Acq. Method     : D:\LC\DATA\ZBK\ZBK-3-61 2021-05-17 22-01-38\PI-80-20-254NM-1ML-5ul-45min.M
Last changed    : 5/17/2021 10:24:39 PM by 系统
Analysis Method : D:\LC\DATA\ZBK\ZBK-3-61 2021-05-17 22-01-38\PI-80-20-254NM-1ML-5ul-45min.M
                (Sequence Method)
Last changed    : 7/28/2021 9:00:10 PM by 系统
                (modified after loading)
Additional Info : Peak(s) manually integrated
  
```

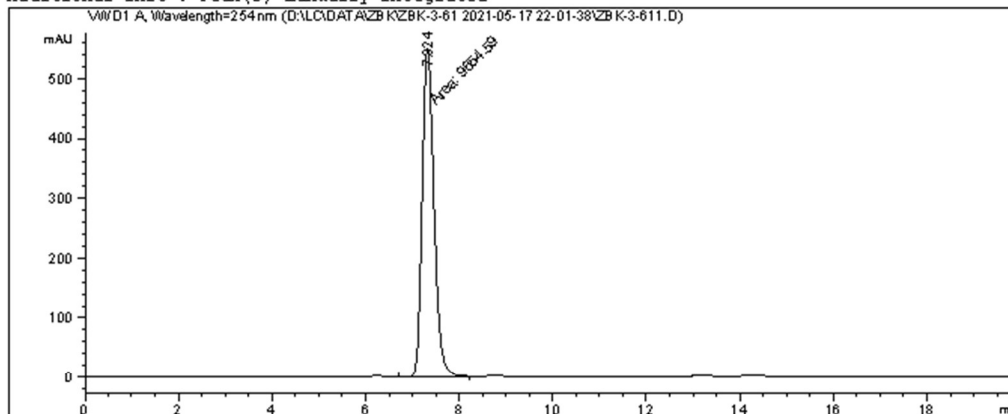

## Area Percent Report

```

Sorted By      :      Signal
Multiplier     :      1.0000
Dilution       :      1.0000
Do not use Multiplier & Dilution Factor with ISTDs
  
```

Signal 1: WVD1 A, Wavelength=254 nm

| Peak # | RetTime [min] | Type | Width [min] | Area [mAU*s] | Height [mAU] | Area %   |
|--------|---------------|------|-------------|--------------|--------------|----------|
| 1      | 7.324         | MF   | 0.2928      | 9654.58984   | 549.59149    | 100.0000 |

Totals :                                    9654.58984   549.59149

\*\*\* End of Report \*\*\*

# HPLC chromatogram of compound (rac)-3o

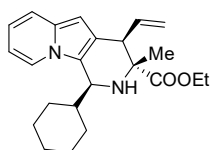

(1S,3R,4R)-3o

Data File D:\LC\DATA\ZBK\ZBK-3-9 2021-03-13 20-05-56\ZBK-3-91.D  
 Sample Name: ZBK-3-9

```

=====
Acq. Operator   : 系统                      Seq. Line :    2
Sample Operator : 系统                      Location  :    3
Acq. Instrument : 1200                      Inj       :    1
Injection Date  : 3/13/2021 8:18:20 PM      Inj Volume: 5.000 µl
Acq. Method    : D:\LC\DATA\ZBK\ZBK-3-9 2021-03-13 20-05-56\P1-AD-H-95-5-254NM-1ML-5ul-30min
                                           .M
Last changed   : 3/13/2021 8:31:18 PM by 系统
                                           (modified after loading)
Analysis Method : D:\LC\DATA\ZBK\ZBK-3-9 2021-03-13 20-05-56\P1-AD-H-95-5-254NM-1ML-5ul-30min
                                           .M (Sequence Method)
Last changed   : 7/28/2021 8:17:20 PM by 系统
                                           (modified after loading)
Additional Info : Peak(s) manually integrated
  
```

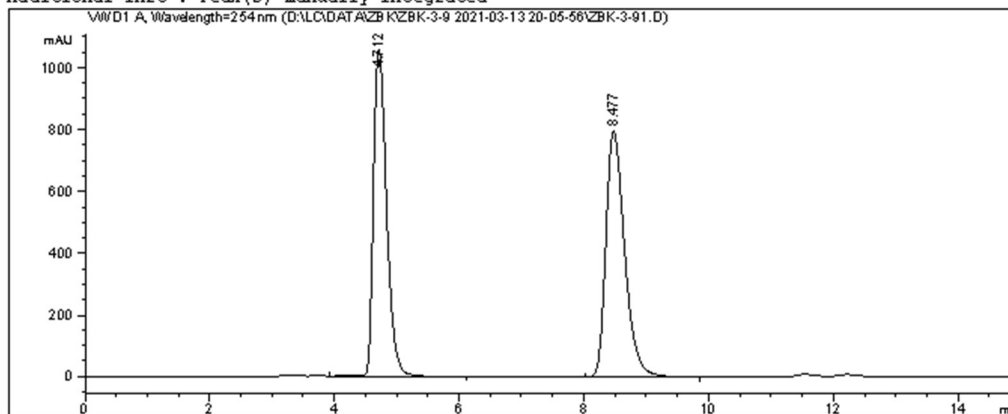

## Area Percent Report

```

Sorted By      :      Signal
Multiplier     :      1.0000
Dilution       :      1.0000
Do not use Multiplier & Dilution Factor with ISTDs
  
```

Signal 1: WVD1 A, Wavelength=254 nm

| Peak # | RetTime [min] | Type | Width [min] | Area [mAU*s] | Height [mAU] | Area %  |
|--------|---------------|------|-------------|--------------|--------------|---------|
| 1      | 4.712         | VV R | 0.2261      | 1.53917e4    | 1058.06335   | 48.1640 |
| 2      | 8.477         | BB   | 0.3200      | 1.65652e4    | 795.85736    | 51.8360 |

Totals : 3.19569e4 1853.92072

\*\*\* End of Report \*\*\*

# HPLC chromatogram of compound (1S,3R,4R)-3o



(1S,3R,4R)-3o

Data File D:\LC\DATA\ZBK\ZBK-3-9 2021-03-13 20-05-56\ZBK-3-92.D  
 Sample Name: ZBK-3-8

```

=====
Acq. Operator   : 系统                      Seq. Line :    3
Sample Operator : 系统                      Location  :    4
Acq. Instrument : 1200                      Inj       :    1
Injection Date  : 3/13/2021 8:34:35 PM      Inj Volume: 5.000 µl
Acq. Method    : D:\LC\DATA\ZBK\ZBK-3-9 2021-03-13 20-05-56\P1-AD-H-95-5-254NM-1ML-5ul-30min
                                           .M
Last changed   : 3/13/2021 8:31:18 PM by 系统
Analysis Method : D:\LC\DATA\ZBK\ZBK-3-9 2021-03-13 20-05-56\P1-AD-H-95-5-254NM-1ML-5ul-30min
                                           .M (Sequence Method)
Last changed   : 7/28/2021 8:21:32 PM by 系统
                                           (modified after loading)
Additional Info : Peak(s) manually integrated
  
```

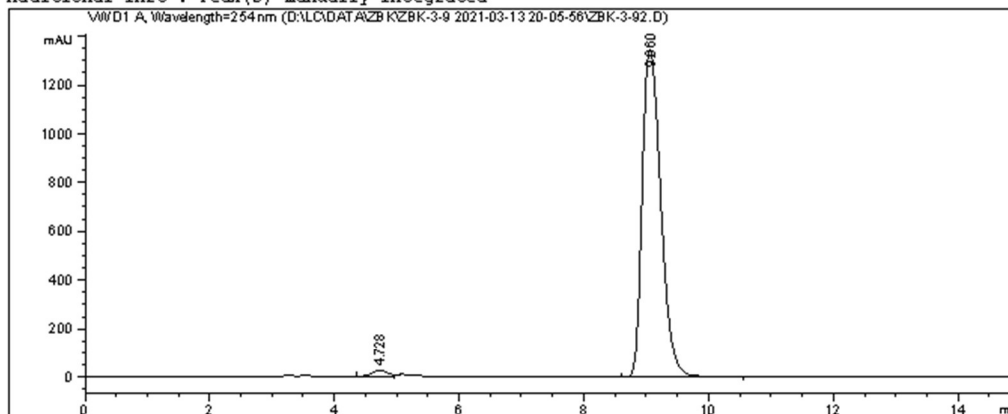

## Area Percent Report

```

Sorted By      :      Signal
Multiplier     :      1.0000
Dilution       :      1.0000
Do not use Multiplier & Dilution Factor with ISTDs
  
```

Signal 1: WWD1 A, Wavelength=254 nm

| Peak # | RetTime [min] | Type | Width [min] | Area [mAU*s] | Height [mAU] | Area %  |
|--------|---------------|------|-------------|--------------|--------------|---------|
| 1      | 4.728         | BV   | 0.2794      | 440.95612    | 24.54942     | 1.5645  |
| 2      | 9.060         | BV R | 0.3251      | 2.77437e4    | 1344.77075   | 98.4355 |

Totals :                                    2.81847e4  1369.32017

\*\*\* End of Report \*\*\*

# HPLC chromatogram of compound (rac)-3p

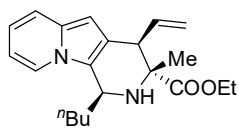

(1S,3R,4R)-3p

Data File D:\HPLC\DATA\20230215\A 2023-02-15 09-02-41\A2.D  
 Sample Name: ZBK-6-6RAC

```

=====
Acq. Operator   : SYSTEM                      Seq. Line :    3
Acq. Instrument : 1260                        Location  :   21
Injection Date  : 2/15/2023 10:26:05 AM      Inj       :    1
                                           Inj Volume: 5.000 µl
Acq. Method     : D:\HPLC\Data\20230215\A 2023-02-15 09-02-41\2-IA-99-1-0.3ML-SUL-70MIN-254NM
                  -DAD.M
Last changed    : 2/15/2023 9:02:42 AM by SYSTEM
Analysis Method : D:\HPLC\Data\20230215\A 2023-02-15 09-02-41\2-IA-99-1-0.3ML-SUL-70MIN-254NM
                  -DAD.M (Sequence Method)
Last changed    : 2/24/2023 6:53:46 PM by SYSTEM
                  (modified after loading)
Additional Info  : Peak(s) manually integrated
  
```

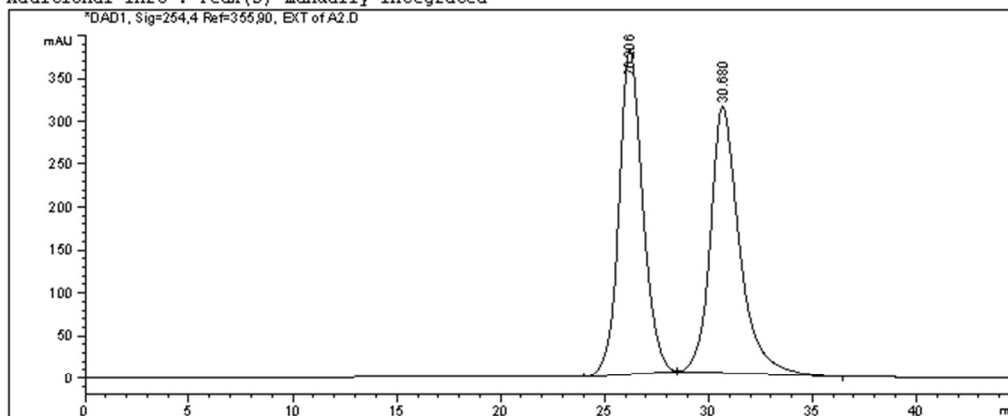

## Area Percent Report

```

Sorted By      : Signal
Multiplier     : 1.0000
Dilution      : 1.0000
Do not use Multiplier & Dilution Factor with ISTDs
  
```

Signal 1: DAD1, Sig=254,4 Ref=355,90, EXT  
 Signal has been modified after loading from rawdata file!

| Peak # | RetTime [min] | Type | Width [min] | Area [mAU*s] | Height [mAU] | Area %  |
|--------|---------------|------|-------------|--------------|--------------|---------|
| 1      | 26.206        | BB   | 1.1601      | 3.01921e4    | 377.88687    | 49.9061 |
| 2      | 30.680        | BB   | 1.3618      | 3.03058e4    | 310.74753    | 50.0939 |

Totals :                    6.04978e4    688.63440

\*\*\* End of Report \*\*\*

# HPLC chromatogram of compound (1*S*,3*R*,4*R*)-3p



(1*S*,3*R*,4*R*)-3p

Data File D:\HPLC\DATA\20230223\A 2023-02-23 10-45-21\A31.D  
 Sample Name: ZBK-6-6R/R

```

=====
Acq. Operator   : SYSTEM                      Seq. Line :   32
Acq. Instrument : 1260                       Location  :   22
Injection Date  : 2/24/2023 4:10:23 AM       Inj       :    2
                                           Inj Volume: 5.000 µl
Acq. Method     : D:\HPLC\Data\20230223\A 2023-02-23 10-45-21\2-IA-99-1-0.3ML-SUL-70MIN-254NM
                  -DAD.M
Last changed    : 2/23/2023 11:04:35 AM by SYSTEM
Analysis Method : D:\HPLC\Data\20230223\A 2023-02-23 10-45-21\2-IA-99-1-0.3ML-SUL-70MIN-254NM
                  -DAD.M (Sequence Method)
Last changed    : 2/24/2023 6:48:41 PM by SYSTEM
                  (modified after loading)
Additional Info : Peak(s) manually integrated
  
```

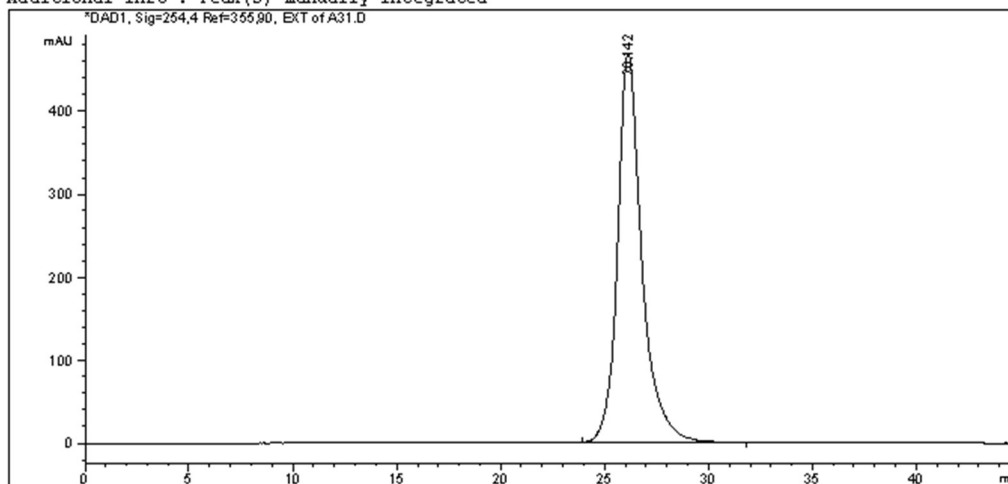

## Area Percent Report

```

Sorted By      :      Signal
Multiplier     :      1.0000
Dilution      :      1.0000
Do not use Multiplier & Dilution Factor with ISTDs
  
```

Signal 1: DAD1, Sig=254,4 Ref=355,90, EXT  
 Signal has been modified after loading from rawdata file!

| Peak # | RetTime [min] | Type | Width [min] | Area [mAU*s] | Height [mAU] | Area %   |
|--------|---------------|------|-------------|--------------|--------------|----------|
| 1      | 26.142        | BB   | 1.1478      | 3.80922e4    | 467.91635    | 100.0000 |

Totals :                                    3.80922e4   467.91635

\*\*\* End of Report \*\*\*

# HPLC chromatogram of compound (rac)-3q

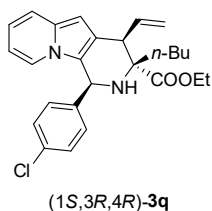

Data File E:\DATA\ZBK\ZBK-2-105-104 2020-12-12 20-45-51\ZBK-2-105-1043.D  
 Sample Name: ZBK-2-105X

```

=====
Acq. Operator   : SYSTEM                      Seq. Line :    4
Acq. Instrument : 1260                        Location  :   43
Injection Date  : 12/12/2020 9:46:41 PM      Inj       :    1
                                           Inj Volume: 5.000 µl
Acq. Method     : E:\DATA\ZBK\ZBK-2-105-104 2020-12-12 20-45-51\2-AD-H-95-5-1ML--SUL-25MIN-
                  DAD.M
Last changed    : 12/12/2020 9:52:45 PM by SYSTEM
                  (modified after loading)
Analysis Method : E:\DATA\ZBK\ZBK-2-105-104 2020-12-12 20-45-51\2-AD-H-95-5-1ML--SUL-25MIN-
                  DAD.M (Sequence Method)
Last changed    : 7/29/2021 11:47:51 AM by SYSTEM
                  (modified after loading)
Additional Info : Peak(s) manually integrated
  
```

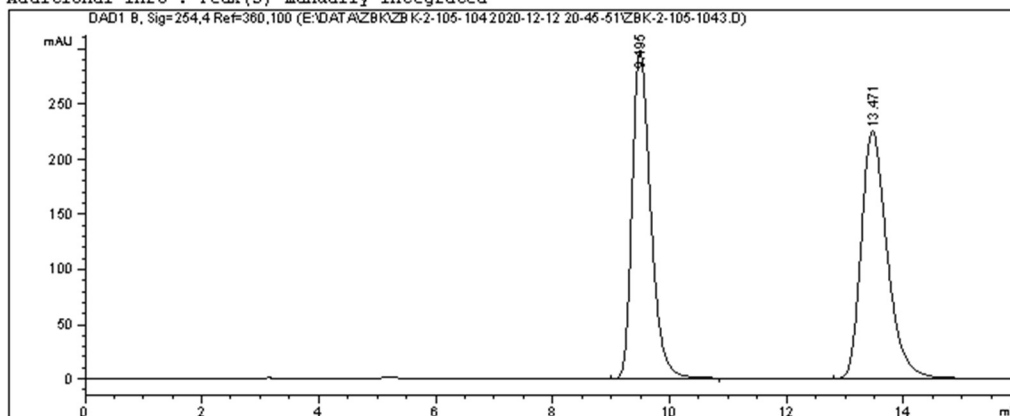

## Area Percent Report

```

Sorted By      : Signal
Multiplier     : 1.0000
Dilution       : 1.0000
Do not use Multiplier & Dilution Factor with ISTDs
  
```

Signal 1: DAD1 B, Sig=254,4 Ref=360,100

| Peak #   | RetTime [min] | Type | Width [min] | Area [mAU*s] | Height [mAU] | Area %  |
|----------|---------------|------|-------------|--------------|--------------|---------|
| 1        | 9.495         | BB   | 0.3392      | 6575.32617   | 298.25720    | 48.5581 |
| 2        | 13.471        | BB   | 0.4723      | 6965.82080   | 225.58434    | 51.4419 |
| Totals : |               |      |             | 1.35411e4    | 523.84154    |         |

\*\*\* End of Report \*\*\*



# HPLC chromatogram of compound (1*S*,3*R*,4*R*)-3q

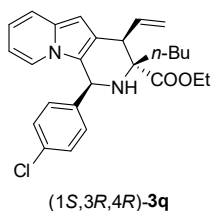

Data File E:\DATA\ZBK\ZBK-2-104 2020-12-14 17-47-57\ZBK-2-1041.D  
 Sample Name: ZBK-2-104-2

```

=====
Acq. Operator   : SYSTEM                               Seq. Line :    2
Acq. Instrument : 1260                                 Location  :   11
Injection Date  : 12/14/2020 6:00:54 PM              Inj       :    1
                                                    Inj Volume: 5.000 µl
Acq. Method     : E:\DATA\ZBK\ZBK-2-104 2020-12-14 17-47-57\2-AD-H-95-5-1ML--SUL-25MIN-DAD.M
Last changed    : 12/14/2020 5:47:58 PM by SYSTEM
Analysis Method : E:\DATA\ZBK\ZBK-2-104 2020-12-14 17-47-57\2-AD-H-95-5-1ML--SUL-25MIN-DAD.M
                  (Sequence Method)
Last changed    : 7/29/2021 11:51:04 AM by SYSTEM
                  (modified after loading)
Additional Info : Peak(s) manually integrated
  
```

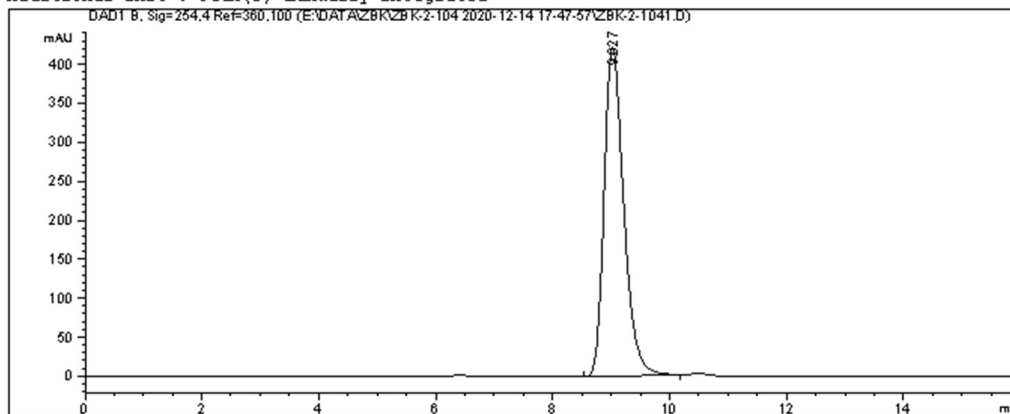

## Area Percent Report

```

Sorted By      :      Signal
Multiplier     :      1.0000
Dilution       :      1.0000
Do not use Multiplier & Dilution Factor with ISTDs
  
```

Signal 1: DAD1 B, Sig=254,4 Ref=360,100

| Peak # | RetTime [min] | Type | Width [min] | Area [mAU*s] | Height [mAU] | Area %   |
|--------|---------------|------|-------------|--------------|--------------|----------|
| 1      | 9.027         | BB   | 0.3583      | 9831.44434   | 421.22473    | 100.0000 |

Totals :                    9831.44434   421.22473

\*\*\* End of Report \*\*\*

# HPLC chromatogram of compound (rac)-3r

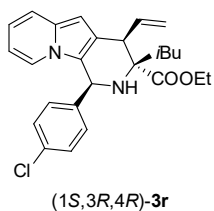

Data File E:\DATA\ZBK\ZBK-2-83S-83X 2020-11-24 22-02-19\ZBK-2-83S-83X2.D  
 Sample Name: ZBK-2-83X

```

=====
Acq. Operator   : SYSTEM                      Seq. Line :    3
Acq. Instrument : 1260                        Location  :   52
Injection Date  : 11/24/2020 10:32:12 PM      Inj       :    1
                                           Inj Volume: 10.000 µl
Acq. Method     : E:\DATA\ZBK\ZBK-2-83S-83X 2020-11-24 22-02-19\AD-H-5-95-1ML-25415MIN.M
Last changed    : 11/24/2020 10:02:19 PM by SYSTEM
Analysis Method : E:\DATA\ZBK\ZBK-2-83S-83X 2020-11-24 22-02-19\AD-H-5-95-1ML-25415MIN.M (
                  Sequence Method)
Last changed    : 7/28/2021 10:20:52 PM by SYSTEM
                  (modified after loading)
Additional Info  : Peak(s) manually integrated
  
```

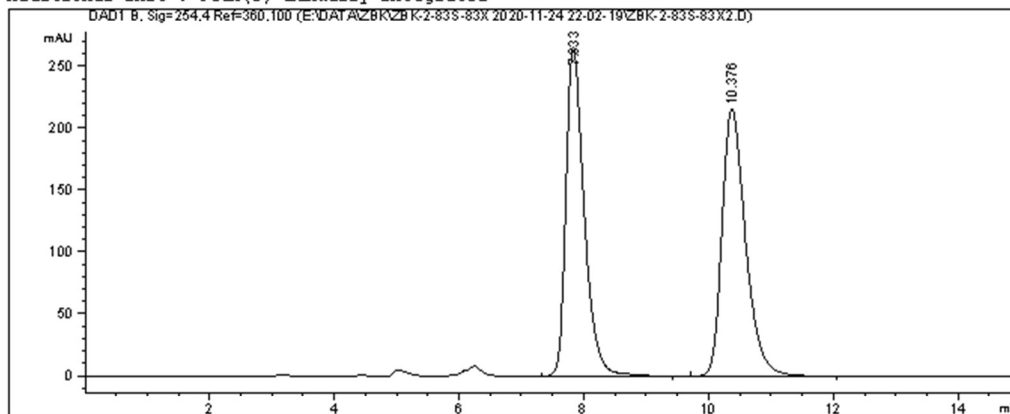

## Area Percent Report

```

Sorted By      :      Signal
Multiplier     :      1.0000
Dilution       :      1.0000
Do not use Multiplier & Dilution Factor with ISTDs
  
```

Signal 1: DAD1 B, Sig=254,4 Ref=360,100

| Peak # | RetTime [min] | Type | Width [min] | Area [mAU*s] | Height [mAU] | Area %  |
|--------|---------------|------|-------------|--------------|--------------|---------|
| 1      | 7.833         | BB   | 0.3080      | 5418.37012   | 265.64490    | 48.8632 |
| 2      | 10.376        | BB   | 0.3998      | 5670.49414   | 216.32591    | 51.1368 |

Totals : 1.10889e4 481.97081

\*\*\* End of Report \*\*\*

# HPLC chromatogram of compound (1*S*,3*R*,4*R*)-3r

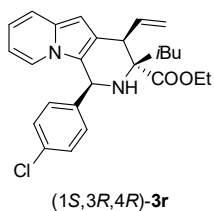

Data File E:\DATA\ZBK\ZBK-2-82-83S-2 2020-11-25 16-51-05\ZBK-2-82-83S-22.D  
 Sample Name: ZBK-2-82

```

=====
Acq. Operator   : SYSTEM                      Seq. Line :    3
Acq. Instrument : 1260                        Location  :   62
Injection Date  : 11/25/2020 5:20:42 PM      Inj       :    1
                                           Inj Volume: 10.000 µl
Acq. Method     : E:\DATA\ZBK\ZBK-2-82-83S-2 2020-11-25 16-51-05\AD-H-5-95-1ML-25415MIN.M
Last changed    : 11/25/2020 4:51:05 PM by SYSTEM
Analysis Method : E:\DATA\ZBK\ZBK-2-82-83S-2 2020-11-25 16-51-05\AD-H-5-95-1ML-25415MIN.M (
                  Sequence Method)
Last changed    : 7/28/2021 10:25:56 PM by SYSTEM
                  (modified after loading)
Additional Info : Peak(s) manually integrated
  
```

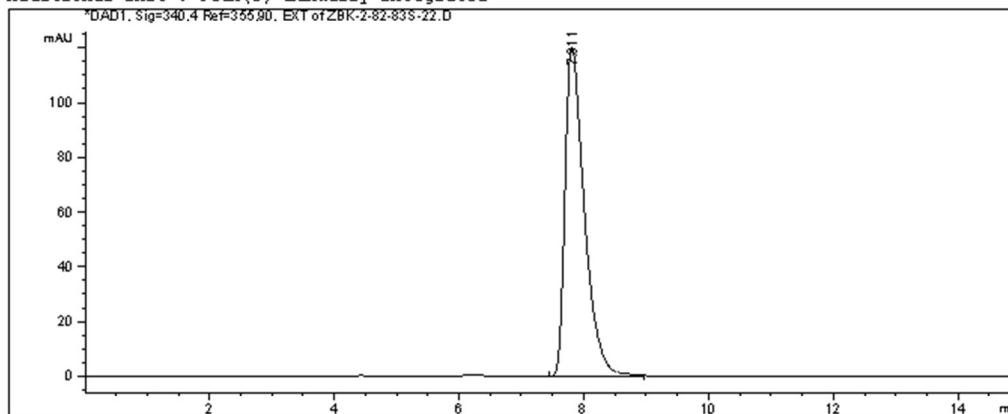

## Area Percent Report

```

Sorted By      :      Signal
Multiplier     :      1.0000
Dilution       :      1.0000
Do not use Multiplier & Dilution Factor with ISTDs
  
```

Signal 1: DAD1, Sig=340,4 Ref=355,90, EXT  
 Signal has been modified after loading from rawdata file!

| Peak # | RetTime [min] | Type | Width [min] | Area [mAU*s] | Height [mAU] | Area %   |
|--------|---------------|------|-------------|--------------|--------------|----------|
| 1      | 7.811         | BB   | 0.3289      | 2580.84229   | 119.99236    | 100.0000 |

Totals :                                    2580.84229    119.99236

\*\*\* End of Report \*\*\*

# HPLC chromatogram of compound (rac)-3s

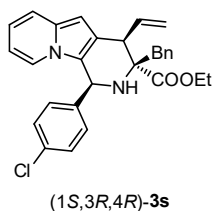

Data File E:\DATA\ZBK\ZBK-2-99-2 2020-12-09 20-17-09\ZBK-2-99-2.D  
 Sample Name: ZBK-2-99-2

```

=====
Acq. Operator   : SYSTEM                               Seq. Line :    1
Acq. Instrument : 1260                                 Location  :   21
Injection Date  : 12/9/2020 8:18:42 PM                 Inj       :    1
                                                    Inj Volume: 5.000 µl
Acq. Method     : E:\DATA\ZBK\ZBK-2-99-2 2020-12-09 20-17-09\AD-H-95-5-254NM-1ML-5ul-40min-
                  DAD.M
Last changed    : 12/9/2020 8:17:09 PM by SYSTEM
Analysis Method : E:\DATA\ZBK\ZBK-2-99-2 2020-12-09 20-17-09\AD-H-95-5-254NM-1ML-5ul-40min-
                  DAD.M (Sequence Method)
Last changed    : 7/29/2021 11:33:58 AM by SYSTEM
                  (modified after loading)
  
```

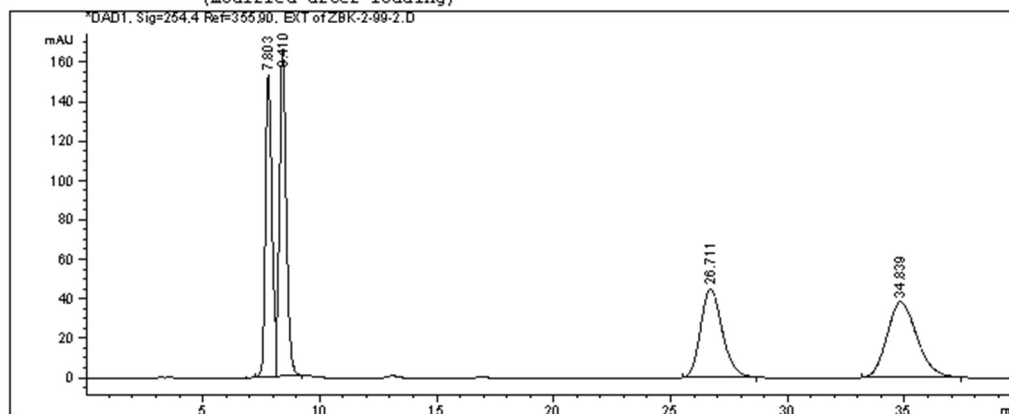

## Area Percent Report

```

Sorted By      :      Signal
Multiplier     :      1.0000
Dilution       :      1.0000
Do not use Multiplier & Dilution Factor with ISTDs
  
```

Signal 1: DAD1, Sig=254,4 Ref=355,90, EXT  
 Signal has been modified after loading from rawdata file!

| Peak # | RetTime [min] | Type | Width [min] | Area [mAU*s] | Height [mAU] | Area %  |
|--------|---------------|------|-------------|--------------|--------------|---------|
| 1      | 7.803         | BV   | 0.2951      | 2954.52905   | 153.10089    | 23.3997 |
| 2      | 8.410         | VB   | 0.3126      | 3399.25610   | 165.48820    | 26.9219 |
| 3      | 26.711        | BB   | 0.7525      | 2878.74585   | 44.98803     | 22.7995 |
| 4      | 34.839        | BB   | 1.0347      | 3393.83472   | 38.45425     | 26.8790 |

Totals : 1.26264e4 402.03138

\*\*\* End of Report \*\*\*

# HPLC chromatogram of compound (1*S*,3*R*,4*R*)-3s

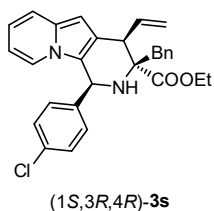

Data File E:\DATA\ZBK\ZBK-2-98 2020-12-08 20-19-31\ZBK-2-98.D  
 Sample Name: ZBK-2-98

```

=====
Acq. Operator   : SYSTEM                               Seq. Line :    1
Acq. Instrument : 1260                                 Location  :   11
Injection Date  : 12/8/2020 8:20:58 PM                Inj       :    1
                                                    Inj Volume: 5.000 µl
Acq. Method     : E:\DATA\ZBK\ZBK-2-98 2020-12-08 20-19-31\AD-H-95-5-254NM-1ML-5ul-40min-DAD.
M
Last changed    : 12/8/2020 8:19:31 PM by SYSTEM
Analysis Method : E:\DATA\ZBK\ZBK-2-98 2020-12-08 20-19-31\AD-H-95-5-254NM-1ML-5ul-40min-DAD.
M (Sequence Method)
Last changed    : 8/19/2021 7:42:45 PM by SYSTEM
                (modified after loading)
Additional Info  : Peak(s) manually integrated
  
```

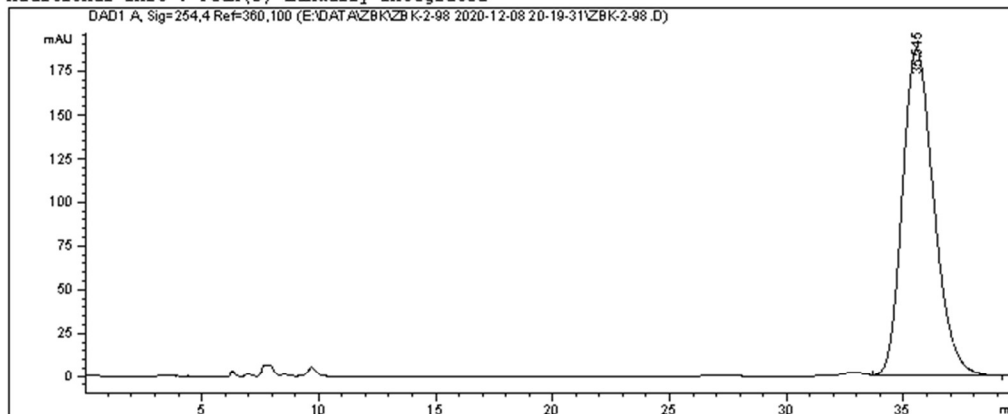

## Area Percent Report

```

Sorted By      : Signal
Multiplier     : 1.0000
Dilution       : 1.0000
Do not use Multiplier & Dilution Factor with ISTDs
  
```

Signal 1: DAD1 A, Sig=254,4 Ref=360,100

| Peak # | RetTime [min] | Type | Width [min] | Area [mAU*s] | Height [mAU] | Area %   |
|--------|---------------|------|-------------|--------------|--------------|----------|
| 1      | 35.545        | BB   | 1.1669      | 1.74810e4    | 186.95708    | 100.0000 |

Totals : 1.74810e4 186.95708

\*\*\* End of Report \*\*\*

# HPLC chromatogram of compound (rac)-3t

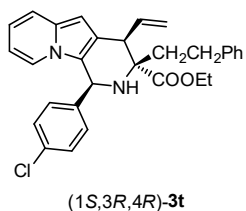

Data File E:\DATA\ZBK\ZBK-2-107 2020-12-15 19-00-06\ZBK-2-1071.D  
 Sample Name: ZBK-2-107S

```

=====
Acq. Operator   : SYSTEM                      Seq. Line :    2
Acq. Instrument : 1260                        Location  :   41
Injection Date  : 12/15/2020 7:13:06 PM      Inj       :    1
                                           Inj Volume: 5.000 µl
Acq. Method    : E:\DATA\ZBK\ZBK-2-107 2020-12-15 19-00-06\2-AD-H-95-5-1ML--SUL-25MIN-DAD.M
Last changed   : 12/15/2020 7:27:47 PM by SYSTEM
                (modified after loading)
Analysis Method : E:\DATA\ZBK\ZBK-2-107 2020-12-15 19-00-06\2-AD-H-95-5-1ML--SUL-25MIN-DAD.M
                (Sequence Method)
Last changed   : 7/29/2021 11:53:14 AM by SYSTEM
                (modified after loading)
  
```

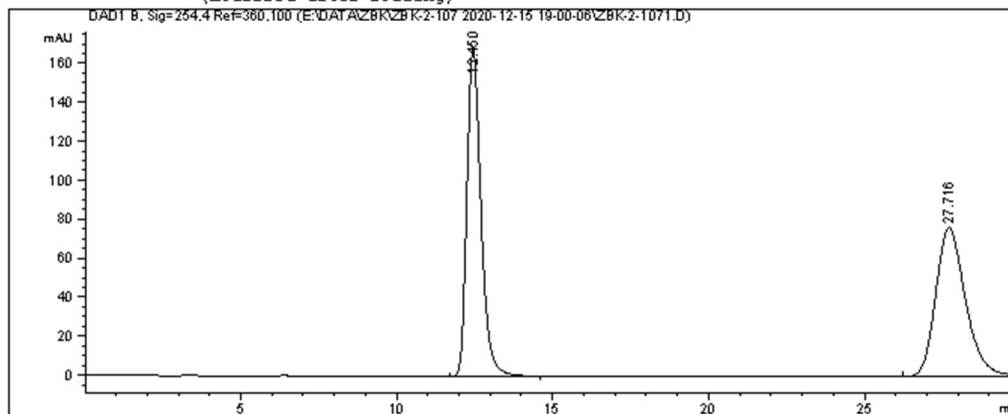

## Area Percent Report

```

Sorted By      :      Signal
Multiplier     :      1.0000
Dilution       :      1.0000
Do not use Multiplier & Dilution Factor with ISTDs
  
```

Signal 1: DAD1 B, Sig=254,4 Ref=360,100

| Peak # | RetTime [min] | Type | Width [min] | Area [mAU*s] | Height [mAU] | Area %  |
|--------|---------------|------|-------------|--------------|--------------|---------|
| 1      | 12.450        | BB   | 0.4756      | 5252.69824   | 168.52895    | 51.3633 |
| 2      | 27.716        | BBA  | 0.9733      | 4973.86279   | 76.02758     | 48.6367 |

Totals :                                    1.02266e4    244.55653

\*\*\* End of Report \*\*\*

# HPLC chromatogram of compound (1*S*,3*R*,4*R*)-3t

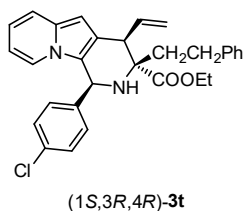

Data File E:\DATA\ZBK\ZBK-2-106 2020-12-17 20-51-38\ZBK-2-1061.D  
 Sample Name: ZBK-2-106

```

=====
Acq. Operator   : SYSTEM                      Seq. Line :    2
Acq. Instrument : 1260                        Location  :   61
Injection Date  : 12/17/2020 9:04:35 PM      Inj       :    1
                                           Inj Volume: 5.000 µl
Acq. Method     : E:\DATA\ZBK\ZBK-2-106 2020-12-17 20-51-38\AD-H-95-5-254NM-1ML-5ul-40min-DAD
                                           .M
Last changed    : 12/17/2020 8:51:39 PM by SYSTEM
Analysis Method : E:\DATA\ZBK\ZBK-2-106 2020-12-17 20-51-38\AD-H-95-5-254NM-1ML-5ul-40min-DAD
                                           .M (Sequence Method)
Last changed    : 7/29/2021 11:55:57 AM by SYSTEM
                                           (modified after loading)
Additional Info  : Peak(s) manually integrated
  
```

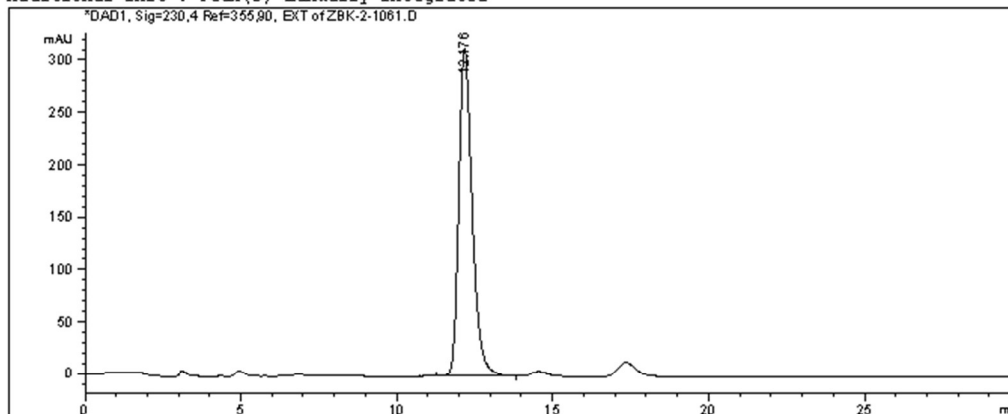

## Area Percent Report

```

Sorted By      :      Signal
Multiplier     :      1.0000
Dilution       :      1.0000
Do not use Multiplier & Dilution Factor with ISTDs
  
```

Signal 1: DAD1, Sig=230,4 Ref=355,90, EXT  
 Signal has been modified after loading from rawdata file!

| Peak # | RetTime [min] | Type | Width [min] | Area [mAU*s] | Height [mAU] | Area %   |
|--------|---------------|------|-------------|--------------|--------------|----------|
| 1      | 12.176        | BB   | 0.4614      | 9460.74805   | 313.21091    | 100.0000 |

Totals :                    9460.74805   313.21091

\*\*\* End of Report \*\*\*

# HPLC chromatogram of compound (rac)-3u

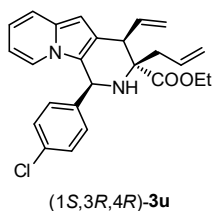

Data File E:\DATA\ZBK\ZBK-2-121S-2 2020-12-25 20-39-27\ZBK-2-121S-25.D  
 Sample Name: ZBK-2-121S

```

=====
Acq. Operator   : SYSTEM                               Seq. Line :    6
Acq. Instrument : 1260                                 Location  :   43
Injection Date  : 12/25/2020 9:46:41 PM              Inj       :    1
                                                    Inj Volume: 5.000 µl
Acq. Method     : E:\DATA\ZBK\ZBK-2-121S-2 2020-12-25 20-39-27\2-IA-95-5-1ML-5UL-20MIN-ALL.M
Last changed    : 12/25/2020 8:39:28 PM by SYSTEM
Analysis Method : E:\DATA\ZBK\ZBK-2-121S-2 2020-12-25 20-39-27\2-IA-95-5-1ML-5UL-20MIN-ALL.M
                (Sequence Method)
Last changed    : 8/19/2021 8:47:25 PM by SYSTEM
                (modified after loading)
Additional Info : Peak(s) manually integrated
  
```

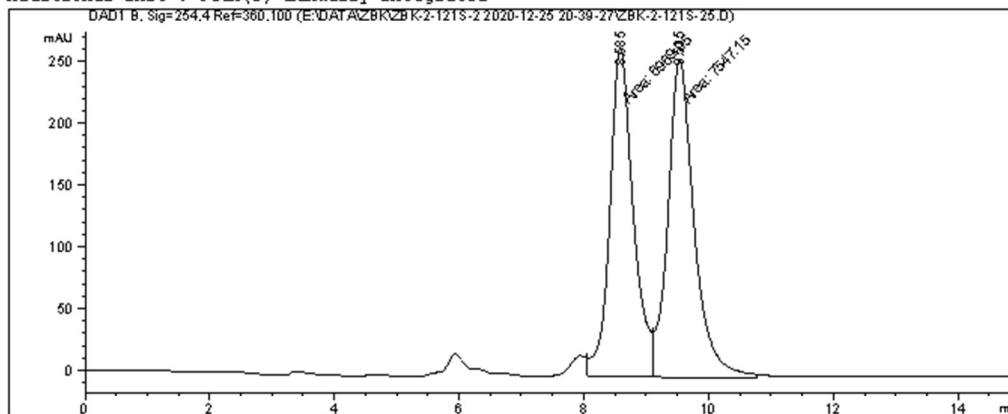

## Area Percent Report

```

Sorted By      :      Signal
Multiplier     :      1.0000
Dilution       :      1.0000
Do not use Multiplier & Dilution Factor with ISTDs
  
```

Signal 1: DAD1 B, Sig=254,4 Ref=360,100

| Peak # | RetTime [min] | Type | Width [min] | Area [mAU*s] | Height [mAU] | Area %  |
|--------|---------------|------|-------------|--------------|--------------|---------|
| 1      | 8.585         | FM   | 0.4364      | 6969.94824   | 266.21698    | 48.0120 |
| 2      | 9.535         | FM   | 0.4888      | 7547.15088   | 257.35364    | 51.9880 |

Totals : 1.45171e4 523.57062

\*\*\* End of Report \*\*\*



# HPLC chromatogram of compound (1*S*,3*R*,4*R*)-3u

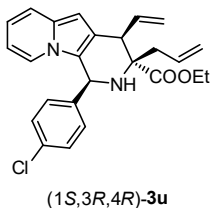

Data File E:\DATA\CTT\CTT\CTT-5-18-OPT 2021-07-29 17-07-11\CTT-5-18-OPT34.D  
 Sample Name: ZBK-2-120

```

=====
Acq. Operator   : SYSTEM                               Seq. Line :   35
Acq. Instrument : 1260                                 Location  :    6
Injection Date  : 7/30/2021 11:48:52 AM                Inj       :    1
                                                    Inj Volume: 5.000 µl

Acq. Method     : E:\DATA\CTT\CTT\CTT-5-18-OPT 2021-07-29 17-07-11\2-IA-95-5-1ML-SUL-20MIN-
                  ALL.M
Last changed    : 7/29/2021 10:23:58 PM by SYSTEM
Analysis Method : E:\DATA\CTT\CTT\CTT-5-18-OPT 2021-07-29 17-07-11\2-IA-95-5-1ML-SUL-20MIN-
                  ALL.M (Sequence Method)
Last changed    : 8/19/2021 8:37:39 PM by SYSTEM
                  (modified after loading)
Additional Info  : Peak(s) manually integrated
  
```

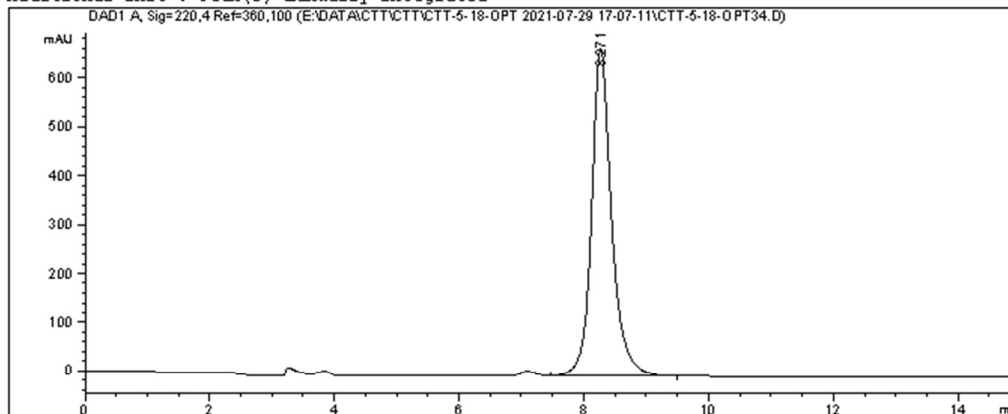

## Area Percent Report

```

Sorted By      : Signal
Multiplier     : 1.0000
Dilution       : 1.0000
Do not use Multiplier & Dilution Factor with ISTDs
  
```

Signal 1: DAD1 A, Sig=220,4 Ref=360,100

| Peak # | RetTime [min] | Type | Width [min] | Area [mAU*s] | Height [mAU] | Area %   |
|--------|---------------|------|-------------|--------------|--------------|----------|
| 1      | 8.271         | BB   | 0.3326      | 1.49649e4    | 669.97913    | 100.0000 |

Totals : 1.49649e4 669.97913

\*\*\* End of Report \*\*\*

# HPLC chromatogram of compound (rac)-3v

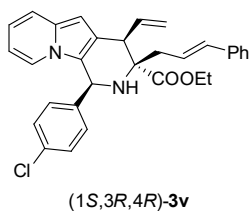

Data File D:\LC\DATA\ZBK\ZBK-2-125 2020-12-29 15-01-38\ZBK-2-1251.D  
 Sample Name: ZBK-2-125S

```

=====
Acq. Operator   : 系统                               Seq. Line :    2
Sample Operator : 系统
Acq. Instrument : 1200                               Location  :   31
Injection Date  : 12/29/2020 3:19:35 PM             Inj       :    1
                                                    Inj Volume: 5.000 µl
Acq. Method     : D:\LC\DATA\ZBK\ZBK-2-125 2020-12-29 15-01-38\P1-AD-H-95-5-254NM-1ML-5ul-
                  30min.M
Last changed    : 12/29/2020 2:58:55 PM by 系统
Analysis Method : D:\LC\DATA\ZBK\ZBK-2-125 2020-12-29 15-01-38\P1-AD-H-95-5-254NM-1ML-5ul-
                  30min.M (Sequence Method)
Last changed    : 7/28/2021 4:59:59 PM by 系统
                  (modified after loading)
Additional Info : Peak(s) manually integrated
  
```

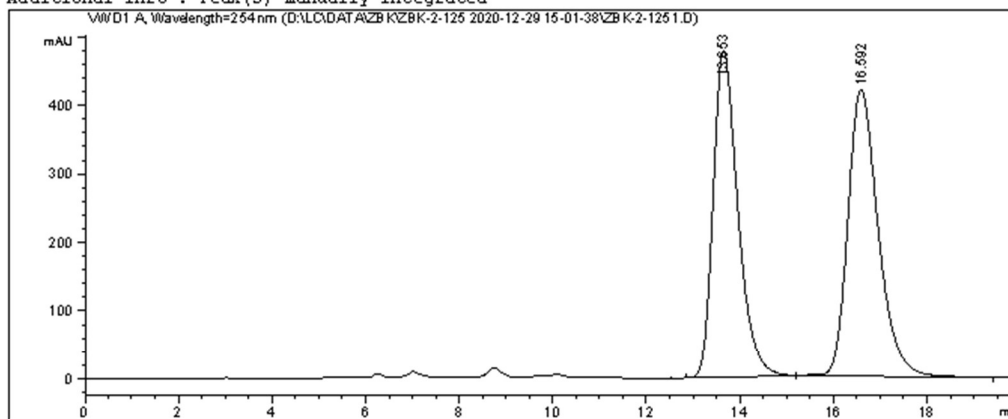

## Area Percent Report

```

Sorted By      :      Signal
Multiplier     :      1.0000
Dilution       :      1.0000
Do not use Multiplier & Dilution Factor with ISTDs
  
```

Signal 1: VWD1 A, Wavelength=254 nm

| Peak #   | RetTime [min] | Type | Width [min] | Area [mAU*s] | Height [mAU] | Area %  |
|----------|---------------|------|-------------|--------------|--------------|---------|
| 1        | 13.653        | BB   | 0.5604      | 1.75939e4    | 478.04611    | 48.2078 |
| 2        | 16.592        | VV R | 0.6912      | 1.89020e4    | 419.85510    | 51.7922 |
| Totals : |               |      |             | 3.64959e4    | 897.90121    |         |

\*\*\* End of Report \*\*\*

# HPLC chromatogram of compound (1S,3R,4R)-3v

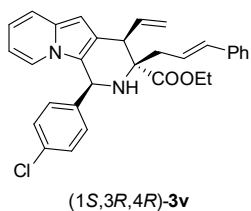

Data File D:\LC\DATA\ZBK\ZBK-2-124 2020-12-29 16-22-18\ZBK-2-1241.D  
 Sample Name: ZBK-2-124

```

=====
Acq. Operator   : 系统                               Seq. Line :    2
Sample Operator : 系统
Acq. Instrument : 1200                               Location  :   33
Injection Date  : 12/29/2020 4:31:14 PM              Inj       :    1
                                                    Inj Volume: 5.000 µl
Acq. Method     : D:\LC\DATA\ZBK\ZBK-2-124 2020-12-29 16-22-18\P1-AD-H-95-5-254NM-1ML-5ul-30min.M
Last changed    : 12/29/2020 2:58:55 PM by 系统
Analysis Method : D:\LC\DATA\ZBK\ZBK-2-124 2020-12-29 16-22-18\P1-AD-H-95-5-254NM-1ML-5ul-30min.M (Sequence Method)
Last changed    : 7/28/2021 5:15:24 PM by 系统
                  (modified after loading)
Additional Info : Peak(s) manually integrated
  
```

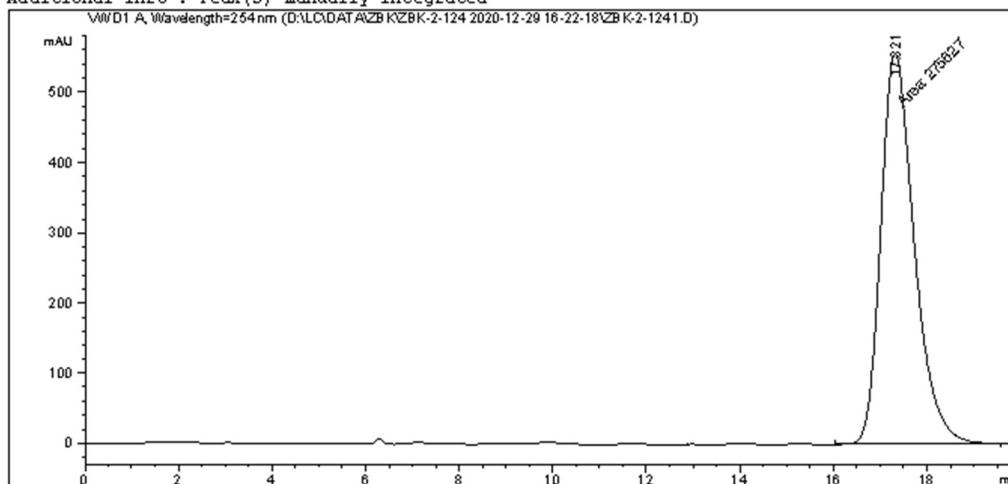

## Area Percent Report

```

Sorted By      :      Signal
Multiplier     :      1.0000
Dilution       :      1.0000
Do not use Multiplier & Dilution Factor with ISTDs
  
```

Signal 1: VWD1 A, Wavelength=254 nm

| Peak #   | RetTime [min] | Type | Width [min] | Area [mAU*s] | Height [mAU] | Area %   |
|----------|---------------|------|-------------|--------------|--------------|----------|
| 1        | 17.321        | MM   | 0.8270      | 2.75627e4    | 555.45636    | 100.0000 |
| Totals : |               |      |             | 2.75627e4    | 555.45636    |          |

\*\*\* End of Report \*\*\*

# HPLC chromatogram of compound (rac)-3w

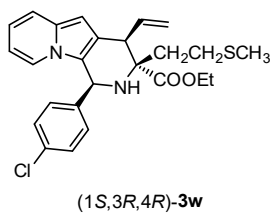

Data File E:\DATA\ZBK\ZBK-2-95-2 2020-12-04 16-07-01\ZBK-2-95-2.D  
 Sample Name: ZBK-2-95-2

```

=====
Acq. Operator   : SYSTEM                               Seq. Line :    1
Acq. Instrument : 1260                                 Location  :   12
Injection Date  : 12/4/2020 4:08:31 PM                Inj       :    1
                                                    Inj Volume: 5.000 µl
Acq. Method     : E:\DATA\ZBK\ZBK-2-95-2 2020-12-04 16-07-01\AD-H-95-5-254NM-1ML-5ul-40min-
                  DAD.M
Last changed    : 12/4/2020 4:07:01 PM by SYSTEM
Analysis Method : E:\DATA\ZBK\ZBK-2-95-2 2020-12-04 16-07-01\AD-H-95-5-254NM-1ML-5ul-40min-
                  DAD.M (Sequence Method)
Last changed    : 7/29/2021 11:28:39 AM by SYSTEM
                  (modified after loading)
  
```

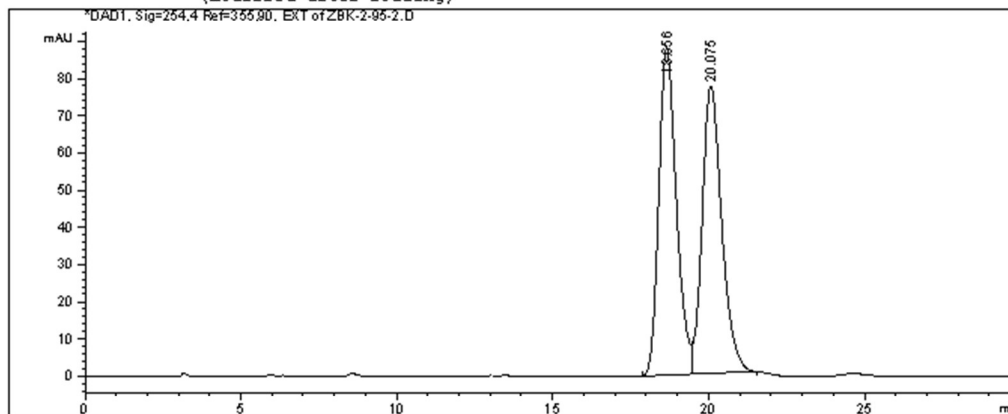

## Area Percent Report

```

Sorted By      :      Signal
Multiplier     :      1.0000
Dilution       :      1.0000
Do not use Multiplier & Dilution Factor with ISTDs
  
```

Signal 1: DAD1, Sig=254,4 Ref=355,90, EXT  
 Signal has been modified after loading from rawdata file!

| Peak # | RetTime [min] | Type | Width [min] | Area [mAU*s] | Height [mAU] | Area %  |
|--------|---------------|------|-------------|--------------|--------------|---------|
| 1      | 18.656        | BV   | 0.5824      | 3442.93726   | 88.01923     | 50.5357 |
| 2      | 20.075        | VB   | 0.6346      | 3369.94751   | 77.29643     | 49.4643 |

Totals :                    6812.88477   165.31567

\*\*\* End of Report \*\*\*

# HPLC chromatogram of compound (1*S*,3*R*,4*R*)-3w

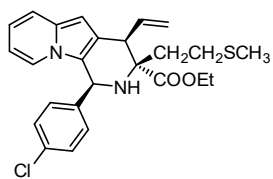

(1*S*,3*R*,4*R*)-3w

Data File E:\DATA\ZBK\ZBK-2-94 2020-12-03 22-23-50\ZBK-2-94.D  
 Sample Name: ZBK-2-94

```

=====
Acq. Operator   : SYSTEM                      Seq. Line :    1
Acq. Instrument : 1260                        Location  :   61
Injection Date  : 12/3/2020 10:25:09 PM      Inj       :    1
                                           Inj Volume: 5.000 µl
Acq. Method     : E:\DATA\ZBK\ZBK-2-94 2020-12-03 22-23-50\AD-H-95-5-254NM-1ML-5ul-40min-DAD.
                                           M
Last changed    : 12/3/2020 10:25:27 PM by SYSTEM
                  (modified after loading)
Analysis Method : E:\DATA\ZBK\ZBK-2-94 2020-12-03 22-23-50\AD-H-95-5-254NM-1ML-5ul-40min-DAD.
                  M (Sequence Method)
Last changed    : 7/29/2021 11:31:33 AM by SYSTEM
                  (modified after loading)
Additional Info  : Peak(s) manually integrated
  
```

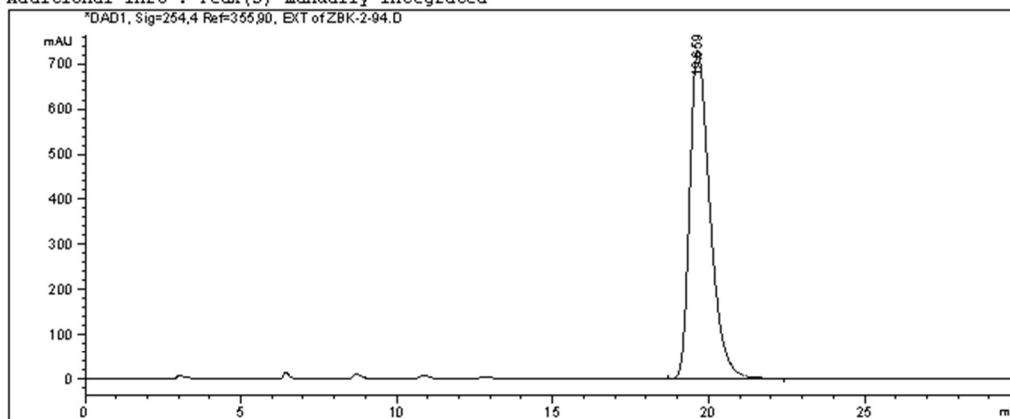

## Area Percent Report

```

Sorted By      : Signal
Multiplier     : 1.0000
Dilution       : 1.0000
Do not use Multiplier & Dilution Factor with ISTDs
  
```

Signal 1: DAD1, Sig=254,4 Ref=355,90, EXT  
 Signal has been modified after loading from rawdata file!

| Peak #   | RetTime [min] | Type | Width [min] | Area [mAU*s] | Height [mAU] | Area %   |
|----------|---------------|------|-------------|--------------|--------------|----------|
| 1        | 19.659        | BB   | 0.6849      | 3.29948e4    | 729.14325    | 100.0000 |
| Totals : |               |      |             | 3.29948e4    | 729.14325    |          |

\*\*\* End of Report \*\*\*

# HPLC chromatogram of compound (rac)-3x

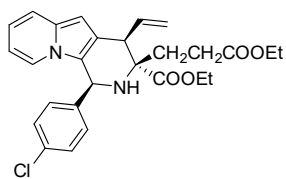

(1S,3R,4R)-3x

Data File E:\DATA\ZBK\ZBK-2-77-4 2020-12-09 18-44-49\ZBK-2-77-41.D  
 Sample Name: ZBK-2-77-4

```

=====
Acq. Operator   : SYSTEM                      Seq. Line :    2
Acq. Instrument : 1260                        Location  :   83
Injection Date  : 12/9/2020 6:57:43 PM       Inj       :    1
                                           Inj Volume: 5.000 µl
Acq. Method     : E:\DATA\ZBK\ZBK-2-77-4 2020-12-09 18-44-49\AD-H-95-5-254NM-1ML-5ul-40min-
                  DAD.M
Last changed    : 12/9/2020 6:44:50 PM by SYSTEM
Analysis Method : E:\DATA\ZBK\ZBK-2-77-4 2020-12-09 18-44-49\AD-H-95-5-254NM-1ML-5ul-40min-
                  DAD.M (Sequence Method)
Last changed    : 7/28/2021 10:13:14 PM by SYSTEM
                  (modified after loading)
  
```

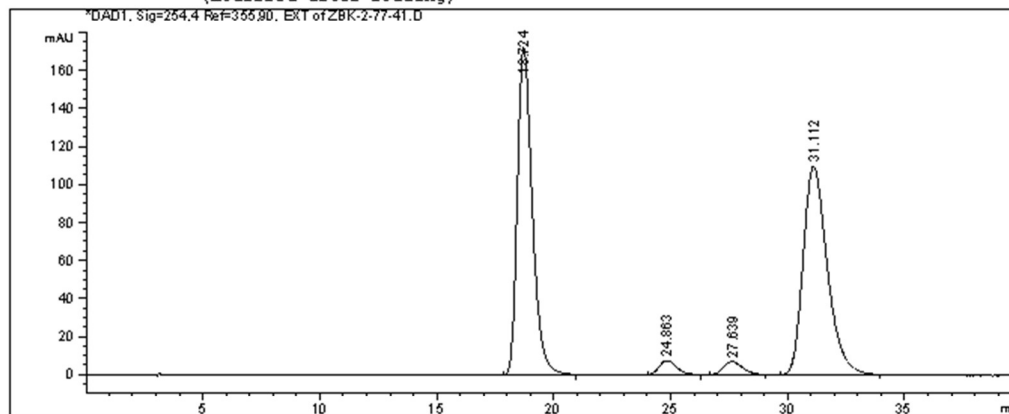

## Area Percent Report

```

Sorted By      : Signal
Multiplier     : 1.0000
Dilution       : 1.0000
Do not use Multiplier & Dilution Factor with ISTDs
  
```

Signal 1: DAD1, Sig=254,4 Ref=355,90, EXT  
 Signal has been modified after loading from rawdata file!

| Peak # | RetTime [min] | Type | Width [min] | Area [mAU*s] | Height [mAU] | Area %  |
|--------|---------------|------|-------------|--------------|--------------|---------|
| 1      | 18.724        | BB   | 0.6499      | 7608.14551   | 172.04539    | 46.6162 |
| 2      | 24.863        | BB   | 0.6197      | 401.96313    | 7.62876      | 2.4629  |
| 3      | 27.639        | BB   | 0.6873      | 408.74911    | 6.97925      | 2.5045  |
| 4      | 31.112        | BB   | 0.8544      | 7901.95605   | 109.70082    | 48.4164 |

Totals : 1.63208e4 296.35423

\*\*\* End of Report \*\*\*

# HPLC chromatogram of compound (1*S*,3*R*,4*R*)-3x

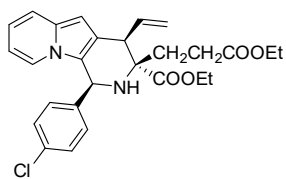

(1*S*,3*R*,4*R*)-3x

Data File E:\DATA\ZBK\ZBK-2-83-76-2 2020-11-23 17-32-48\ZBK-2-83-76-21.D  
 Sample Name: ZBK-2-76-2

```

=====
Acq. Operator   : SYSTEM                      Seq. Line :    2
Acq. Instrument : 1260                        Location  :   51
Injection Date  : 11/23/2020 5:46:11 PM      Inj       :    1
                                           Inj Volume: 5.000 µl
Acq. Method     : E:\DATA\ZBK\ZBK-2-83-76-2 2020-11-23 17-32-48\AD-H-95-5-254NM-1ML-5ul-40min
                  -DAD.M
Last changed    : 11/23/2020 5:32:48 PM by SYSTEM
Analysis Method : E:\DATA\ZBK\ZBK-2-83-76-2 2020-11-23 17-32-48\AD-H-95-5-254NM-1ML-5ul-40min
                  -DAD.M (Sequence Method)
Last changed    : 7/28/2021 10:16:53 PM by SYSTEM
                  (modified after loading)
  
```

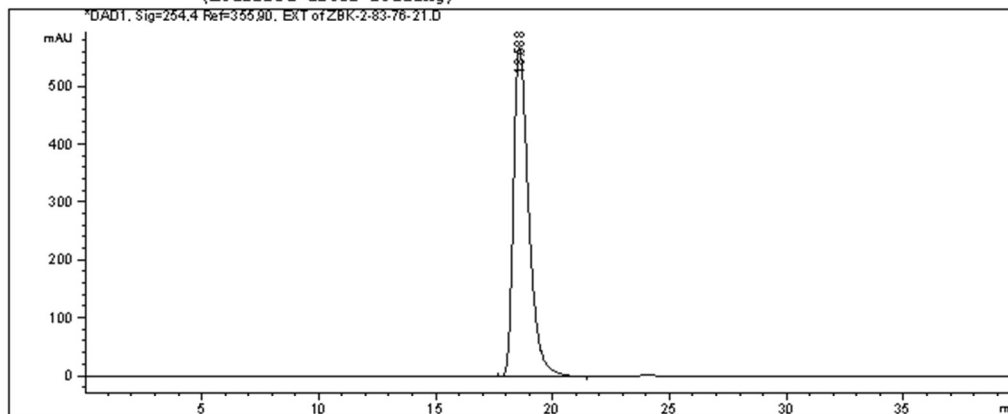

## Area Percent Report

```

Sorted By      :      Signal
Multiplier     :      1.0000
Dilution       :      1.0000
Do not use Multiplier & Dilution Factor with ISTDs
  
```

Signal 1: DAD1, Sig=254,4 Ref=355,90, EXT  
 Signal has been modified after loading from rawdata file!

| Peak # | RetTime [min] | Type | Width [min] | Area [mAU*s] | Height [mAU] | Area %   |
|--------|---------------|------|-------------|--------------|--------------|----------|
| 1      | 18.588        | BB   | 0.6901      | 2.57310e4    | 568.41187    | 100.0000 |

Totals :                    2.57310e4   568.41187

\*\*\* End of Report \*\*\*

# HPLC chromatogram of compound (rac)-3y

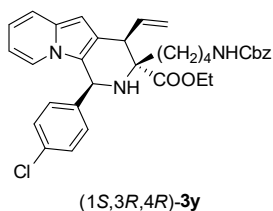

Data File E:\DATA\ZBK\ZBK-2-118RAC 2021-01-13 22-26-28\ZBK-2-118RAC1.D  
 Sample Name: ZBK-2-118RAC

```

=====
Acq. Operator   : SYSTEM                               Seq. Line :    2
Acq. Instrument : 1260                                 Location  :   71
Injection Date  : 1/13/2021 10:38:47 PM              Inj       :    1
                                                    Inj Volume: 5.000 µl
Acq. Method     : E:\DATA\ZBK\ZBK-2-118RAC 2021-01-13 22-26-28\3-ID-80-20-1ML-5ul-60MIN--DAD.
M
Last changed    : 1/13/2021 10:26:29 PM by SYSTEM
Analysis Method : E:\DATA\ZBK\ZBK-2-118RAC 2021-01-13 22-26-28\3-ID-80-20-1ML-5ul-60MIN--DAD.
M (Sequence Method)
Last changed    : 7/29/2021 2:51:55 PM by SYSTEM
                (modified after loading)
Additional Info  : Peak(s) manually integrated
  
```

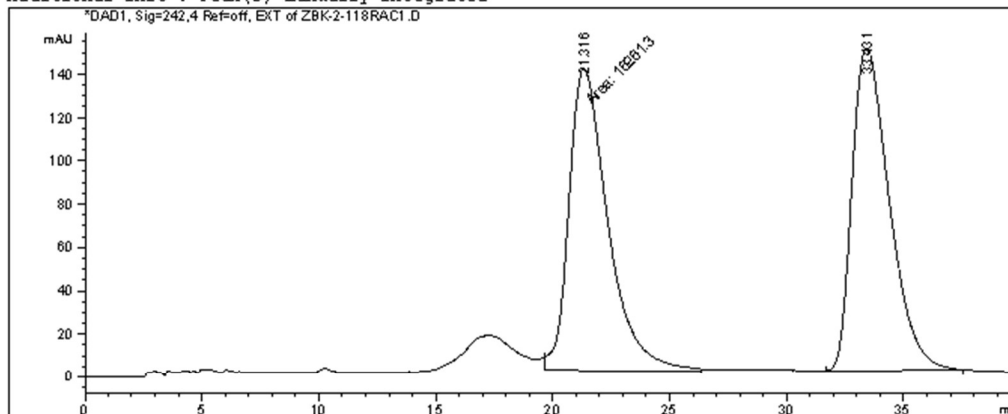

## Area Percent Report

```

Sorted By      : Signal
Multiplier     : 1.0000
Dilution       : 1.0000
Do not use Multiplier & Dilution Factor with ISTDs
  
```

Signal 1: DAD1, Sig=242,4 Ref=off, EXT  
 Signal has been modified after loading from rawdata file!

| Peak #   | RetTime [min] | Type | Width [min] | Area [mAU*s] | Height [mAU] | Area %  |
|----------|---------------|------|-------------|--------------|--------------|---------|
| 1        | 21.316        | FM   | 1.9358      | 1.62613e4    | 140.00591    | 49.5946 |
| 2        | 33.431        | BB   | 1.3016      | 1.65271e4    | 148.93541    | 50.4054 |
| Totals : |               |      |             | 3.27884e4    | 288.94131    |         |

\*\*\* End of Report \*\*\*



# HPLC chromatogram of compound (1*S*,3*R*,4*R*)-3y

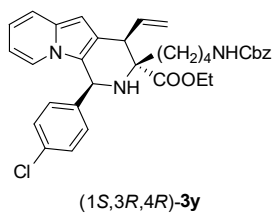

Data File E:\DATA\ZBK\ZBK-2-117-118-4 2021-01-13 20-39-06\ZBK-2-117-118-41.D  
 Sample Name: ZBK-2-117R,Rp

```

=====
Acq. Operator   : SYSTEM                      Seq. Line :    2
Acq. Instrument : 1260                        Location  :   71
Injection Date  : 1/13/2021 8:51:39 PM       Inj       :    1
                                           Inj Volume: 5.000 µl

Acq. Method     : E:\DATA\ZBK\ZBK-2-117-118-4 2021-01-13 20-39-06\3-ID-80-20-1ML-5UL-40MIN-
                  DAD.M
Last changed    : 1/13/2021 8:39:06 PM by SYSTEM
Analysis Method : E:\DATA\ZBK\ZBK-2-117-118-4 2021-01-13 20-39-06\3-ID-80-20-1ML-5UL-40MIN-
                  DAD.M (Sequence Method)
Last changed    : 7/29/2021 2:55:05 PM by SYSTEM
                  (modified after loading)
Additional Info  : Peak(s) manually integrated
  
```

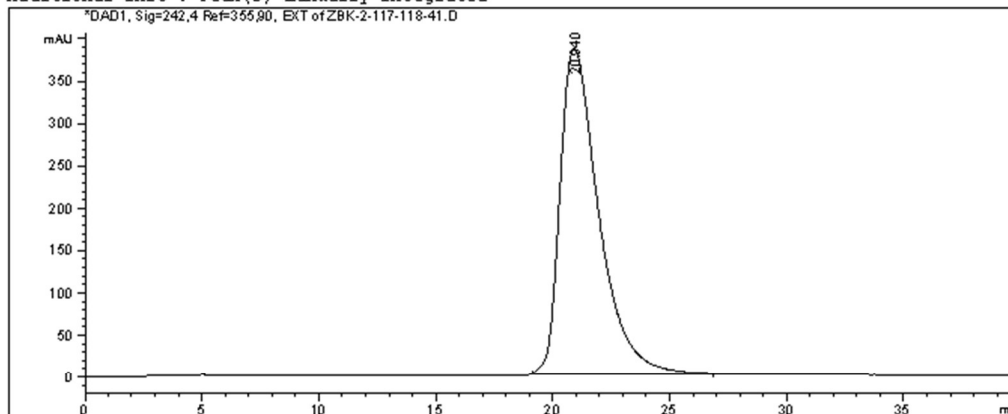

=====  
 Area Percent Report  
 =====

```

Sorted By      : Signal
Multiplier     : 1.0000
Dilution      : 1.0000
Do not use Multiplier & Dilution Factor with ISTDs
  
```

Signal 1: DAD1, Sig=242,4 Ref=355,90, EXT  
 Signal has been modified after loading from rawdata file!

| Peak # | RetTime [min] | Type | Width [min] | Area [mAU*s] | Height [mAU] | Area %   |
|--------|---------------|------|-------------|--------------|--------------|----------|
| 1      | 20.940        | BB   | 1.3473      | 4.41605e4    | 384.40781    | 100.0000 |

Totals :                    4.41605e4   384.40781

=====  
 \*\*\* End of Report \*\*\*

# HPLC chromatogram of compound (rac)-3z

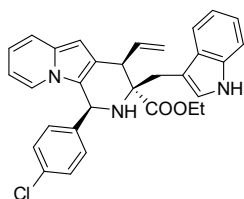

(1S,3R,4R)-3z

Data File E:\DATA\ZBK\ZBK-2-131-4 2021-01-04 18-40-32\ZBK-2-131-41.D  
 Sample Name: ZBK-2-131

```

=====
Acq. Operator   : SYSTEM                      Seq. Line :    2
Acq. Instrument : 1260                        Location  :   11
Injection Date  : 1/4/2021 6:52:56 PM         Inj       :    1
                                           Inj Volume: 5.000 µl
Acq. Method     : E:\DATA\ZBK\ZBK-2-131-4 2021-01-04 18-40-32\ID-90-10-254NM-1ML-5ul-40min-
                  DAD.M
Last changed    : 1/4/2021 7:31:07 PM by SYSTEM
                  (modified after loading)
Analysis Method : E:\DATA\ZBK\ZBK-2-131-4 2021-01-04 18-40-32\ID-90-10-254NM-1ML-5ul-40min-
                  DAD.M (Sequence Method)
Last changed    : 7/29/2021 3:12:08 PM by SYSTEM
                  (modified after loading)
Additional Info : Peak(s) manually integrated
  
```

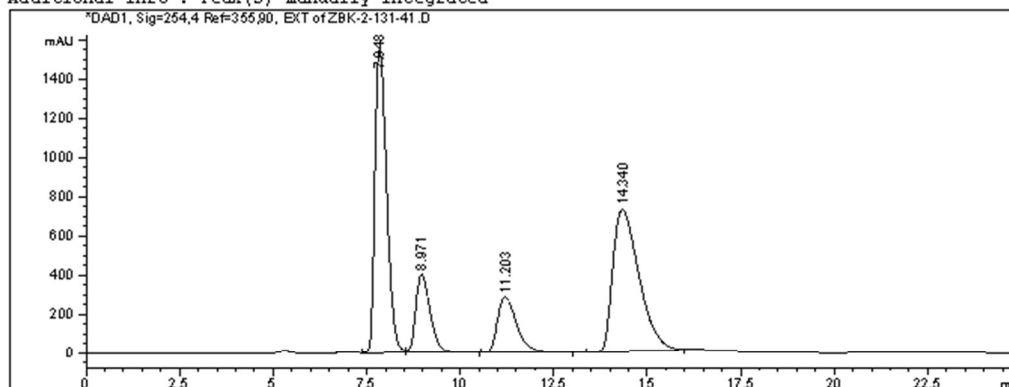

## Area Percent Report

```

Sorted By      :      Signal
Multiplier     :      1.0000
Dilution       :      1.0000
Do not use Multiplier & Dilution Factor with ISTDs
  
```

Signal 1: DAD1, Sig=254,4 Ref=355,90, EXT  
 Signal has been modified after loading from rawdata file!

| Peak # | RetTime [min] | Type | Width [min] | Area [mAU*s] | Height [mAU] | Area %  |
|--------|---------------|------|-------------|--------------|--------------|---------|
| 1      | 7.848         | BV   | 0.3377      | 3.39642e4    | 1549.53247   | 37.5663 |
| 2      | 8.971         | VB   | 0.4091      | 1.07829e4    | 401.84921    | 11.9265 |
| 3      | 11.203        | BB   | 0.5549      | 1.02343e4    | 285.68988    | 11.3198 |
| 4      | 14.340        | BB   | 0.7305      | 3.54299e4    | 727.08154    | 39.1875 |

Totals :                                    9.04113e4  2964.15311

\*\*\* End of Report \*\*\*

# HPLC chromatogram of compound (1S,3R,4R)-3z

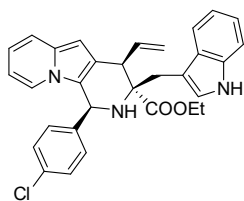

(1S,3R,4R)-3z

Data File E:\DATA\XL\XL-1-9\XL-9-12RAC 2021-01-05 09-31-50\XL-9-12RAC6.D  
 Sample Name: ZBK-2-130

```

=====
Acq. Operator   : SYSTEM                      Seq. Line :    7
Acq. Instrument : 1260                        Location  :   61
Injection Date  : 1/5/2021 12:49:11 PM       Inj       :    1
                                           Inj Volume: 5.000 µl
Acq. Method     : E:\DATA\XL\XL-9-12RAC 2021-01-05 09-31-50\ID-90-10-254NM-1ML-5ul-30min-DAD.
                  M
Last changed    : 1/5/2021 11:57:14 AM by SYSTEM
Analysis Method : E:\DATA\XL\XL-1-9\XL-9-12RAC 2021-01-05 09-31-50\ID-90-10-254NM-1ML-5ul-
                  30min-DAD.M (Sequence Method)
Last changed    : 7/29/2021 3:08:05 PM by SYSTEM
                  (modified after loading)
Additional Info : Peak(s) manually integrated
    
```

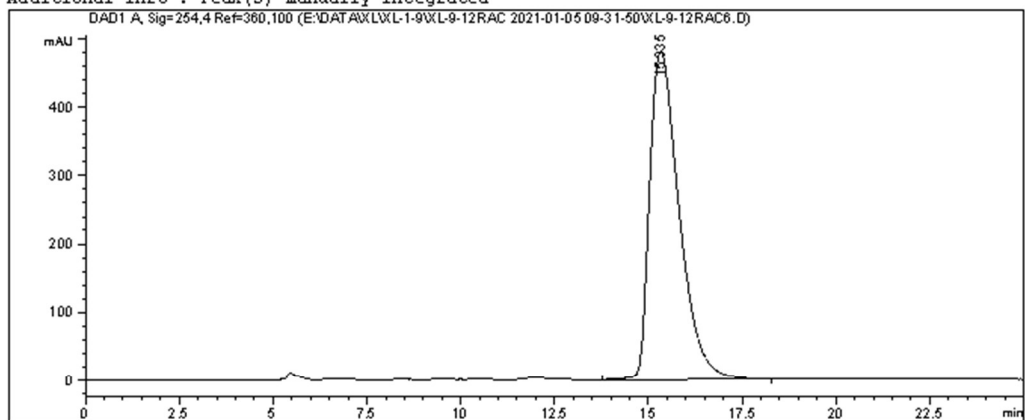

## Area Percent Report

```

=====
Sorted By      :      Signal
Multiplier     :      1.0000
Dilution       :      1.0000
Do not use Multiplier & Dilution Factor with ISTDs
    
```

Signal 1: DAD1 A, Sig=254,4 Ref=360,100

| Peak #   | RetTime [min] | Type | Width [min] | Area [mAU*s] | Height [mAU] | Area %   |
|----------|---------------|------|-------------|--------------|--------------|----------|
| 1        | 15.335        | BB   | 0.8117      | 2.63744e4    | 481.00815    | 100.0000 |
| Totals : |               |      |             | 2.63744e4    | 481.00815    |          |

\*\*\* End of Report \*\*\*

# HPLC chromatogram of compound (rac)-3A

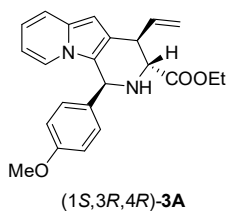

Data File D:\LC\DATA\ZBK\ZBK-4-9RAC 2021-10-26 19-56-46\ZBK-4-9RAC3.D  
 Sample Name: ZBK-4-9RAC

```

=====
Acq. Operator   : 系统                      Seq. Line :    4
Sample Operator : 系统
Acq. Instrument : 1200                      Location  :   54
Injection Date  : 10/26/2021 8:46:13 PM      Inj       :    1
                                           Inj Volume: 5.000 µl
Acq. Method     : D:\LC\DATA\ZBK\ZBK-4-9RAC 2021-10-26 19-56-46\P1-80-20-254NM-1ML-5ul-45min.
                                           M
Last changed    : 10/26/2021 9:03:52 PM by 系统
                                           (modified after loading)
Analysis Method : D:\LC\DATA\ZBK\ZBK-4-9RAC 2021-10-26 19-56-46\P1-80-20-254NM-1ML-5ul-45min.
                                           M (Sequence Method)
Last changed    : 11/22/2022 4:52:37 PM by 系统
                                           (modified after loading)
Additional Info : Peak(s) manually integrated
  
```

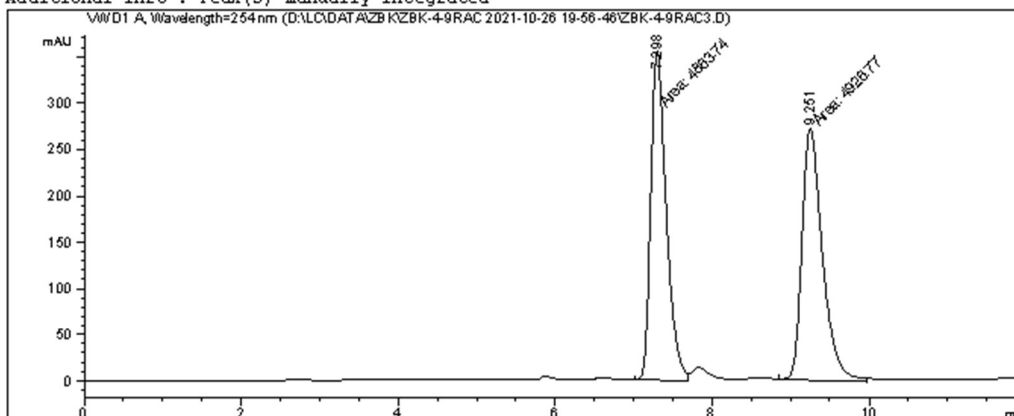

=====  
 Area Percent Report  
 =====

```

Sorted By      :      Signal
Multiplier     :      1.0000
Dilution       :      1.0000
Do not use Multiplier & Dilution Factor with ISTDs
  
```

Signal 1: WVD1 A, Wavelength=254 nm

| Peak # | RetTime [min] | Type | Width [min] | Area [mAU*s] | Height [mAU] | Area %  |
|--------|---------------|------|-------------|--------------|--------------|---------|
| 1      | 7.298         | MM   | 0.2280      | 4863.73730   | 355.56787    | 49.6781 |
| 2      | 9.251         | MM   | 0.3023      | 4926.77295   | 271.59332    | 50.3219 |

Totals :                                    9790.51025    627.16119

=====  
 \*\*\* End of Report \*\*\*

# HPLC chromatogram of compound (1S,3R,4R)-3A

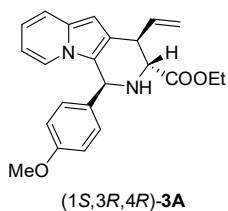

Data File D:\LC\DATA\ZBK\ZBK-4-9 2021-10-26 15-05-04\ZBK-4-9.D  
 Sample Name: ZBK-4-9SS

```

=====
Acq. Operator   : 系统                      Seq. Line :    1
Sample Operator : 系统
Acq. Instrument : 1200                      Location  :   23
Injection Date  : 10/26/2021 3:06:16 PM      Inj       :    1
                                           Inj Volume: 5.000 µl
Acq. Method     : D:\LC\DATA\ZBK\ZBK-4-9 2021-10-26 15-05-04\P1-80-20-254NM-1ML-5ul-45min.M
Last changed    : 10/26/2021 3:31:18 PM by 系统
                 (modified after loading)
Analysis Method : D:\LC\DATA\ZBK\ZBK-4-9 2021-10-26 15-05-04\P1-80-20-254NM-1ML-5ul-45min.M (
                 Sequence Method)
Last changed    : 11/22/2022 4:56:20 PM by 系统
                 (modified after loading)
Additional Info : Peak(s) manually integrated
  
```

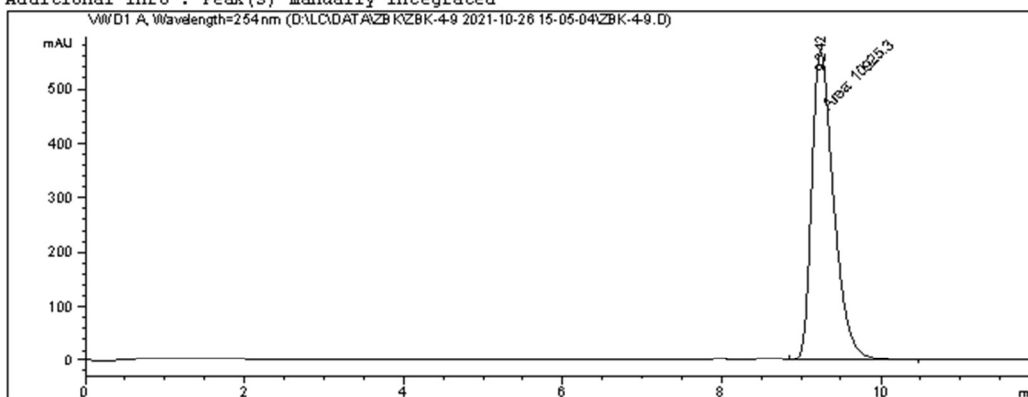

## Area Percent Report

```

Sorted By      : Signal
Multiplier     : 1.0000
Dilution       : 1.0000
Do not use Multiplier & Dilution Factor with ISTDs
  
```

Signal 1: WVD1 A, Wavelength=254 nm

| Peak # | RetTime [min] | Type | Width [min] | Area [mAU*s] | Height [mAU] | Area %   |
|--------|---------------|------|-------------|--------------|--------------|----------|
| 1      | 9.242         | FM   | 0.3208      | 1.09253e4    | 567.68463    | 100.0000 |

Totals : 1.09253e4 567.68463

\*\*\* End of Report \*\*\*

# HPLC chromatogram of compound (rac)-3B

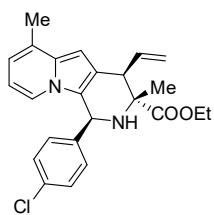

(1S,3R,4R)-3B

Data File D:\LC\DATA\ZBK\ZBK-3-66-4 2021-05-21 19-36-18\ZBK-3-66-4.D  
 Sample Name: ZBK-3-66RAC

```

=====
Acq. Operator   : 系统                      Seq. Line :    1
Sample Operator : 系统
Acq. Instrument : 1200                      Location  :   12
Injection Date  : 5/21/2021 7:37:43 PM      Inj       :    1
                                           Inj Volume: 5.000 µl
Acq. Method     : D:\LC\DATA\ZBK\ZBK-3-66-4 2021-05-21 19-36-18\P1-AD-H-90-10-254NM-1ML-SUL-
                 30MIN.M
Last changed    : 5/21/2021 7:38:09 PM by 系统
                 (modified after loading)
Analysis Method : D:\LC\DATA\ZBK\ZBK-3-66-4 2021-05-21 19-36-18\P1-AD-H-90-10-254NM-1ML-SUL-
                 30MIN.M (Sequence Method)
Last changed    : 11/22/2022 4:59:20 PM by 系统
                 (modified after loading)
Additional Info : Peak(s) manually integrated
  
```

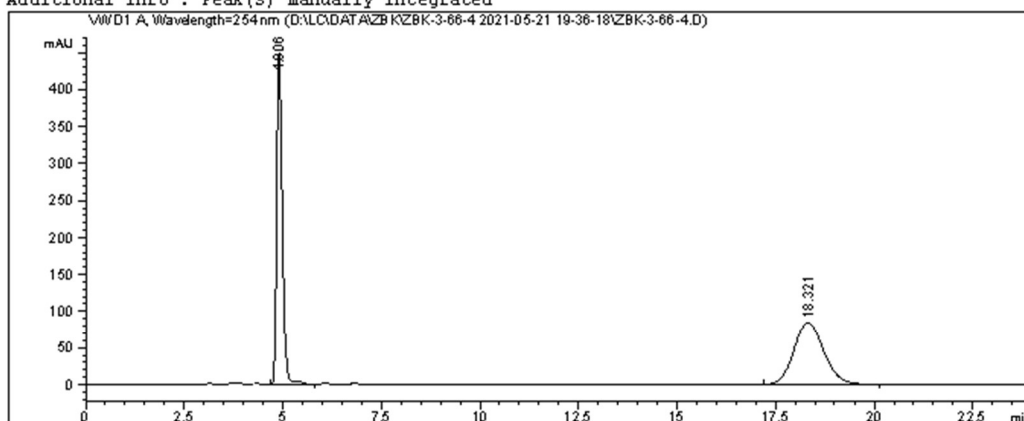

=====  
 Area Percent Report  
 =====

```

Sorted By      :      Signal
Multiplier     :      1.0000
Dilution       :      1.0000
Do not use Multiplier & Dilution Factor with ISTDs
  
```

Signal 1: VWD1 A, Wavelength=254 nm

| Peak # | RetTime [min] | Type | Width [min] | Area [mAU*s] | Height [mAU] | Area %  |
|--------|---------------|------|-------------|--------------|--------------|---------|
| 1      | 4.906         | BV R | 0.1519      | 4466.34814   | 449.39865    | 50.2664 |
| 2      | 18.321        | BV R | 0.7936      | 4419.00537   | 84.90782     | 49.7336 |

Totals :                                    8885.35352    534.30647

=====  
 \*\*\* End of Report \*\*\*

# HPLC chromatogram of compound (1S,3R,4R)-3B

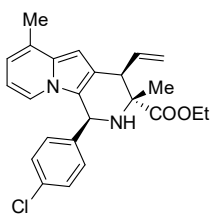

(1S,3R,4R)-3B

Data File D:\LC\DATA\ZBK\ZBK-3-66-4 2021-05-21 19-36-18\ZBK-3-66-41.D  
 Sample Name: ZBK-3-66R/R

```

=====
Acq. Operator   : 系统                               Seq. Line :    2
Sample Operator : 系统
Acq. Instrument : 1200                               Location  :   11
Injection Date  : 5/21/2021 8:03:55 PM              Inj       :    1
                                                    Inj Volume: 5.000 µl
Acq. Method     : D:\LC\DATA\ZBK\ZBK-3-66-4 2021-05-21 19-36-18\P1-AD-H-90-10-254NM-1ML-5UL-30MIN.M
Last changed    : 5/21/2021 7:38:09 PM by 系统
Analysis Method : D:\LC\DATA\ZBK\ZBK-3-66-4 2021-05-21 19-36-18\P1-AD-H-90-10-254NM-1ML-5UL-30MIN.M (Sequence Method)
Last changed    : 11/22/2022 5:01:08 PM by 系统
                (modified after loading)
Additional Info : Peak(s) manually integrated
  
```

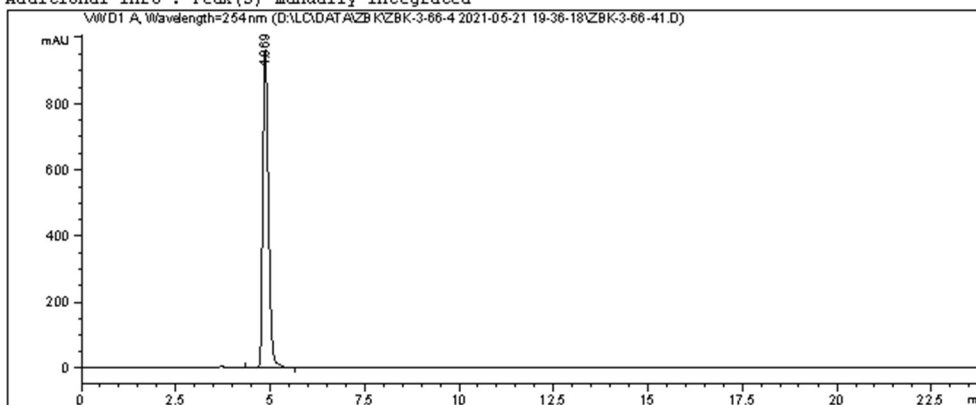

=====  
 Area Percent Report  
 =====

```

Sorted By      :      Signal
Multiplier     :      1.0000
Dilution       :      1.0000
Do not use Multiplier & Dilution Factor with ISTDs
  
```

Signal 1: VWD1 A, Wavelength=254 nm

| Peak # | RetTime [min] | Type | Width [min] | Area [mAU*s] | Height [mAU] | Area %   |
|--------|---------------|------|-------------|--------------|--------------|----------|
| 1      | 4.869         | VB R | 0.1577      | 9886.07324   | 962.55554    | 100.0000 |

Totals :                                    9886.07324   962.55554

=====  
 \*\*\* End of Report \*\*\*

# HPLC chromatogram of compound (rac)-3C

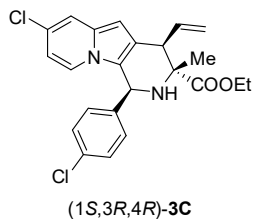

Data File D:\LC\DATA\ZBK\ZBK-3-38RAC-2 2021-04-16 10-52-38\ZBK-3-38RAC-21.D  
 Sample Name: ZBK-3-38RAC-2

```

=====
Acq. Operator   : 系统                               Seq. Line :    2
Sample Operator : 系统                               Location  :    3
Acq. Instrument : 1200                               Inj       :    1
Injection Date  : 4/16/2021 10:57:52 AM              Inj Volume: 5.000 µl
Acq. Method    : D:\LC\DATA\ZBK\ZBK-3-38RAC-2 2021-04-16 10-52-38\P1-AD-H-80-20-254NM-1ML-
                SUL-20MIN.M
Last changed   : 1/14/2021 2:49:11 PM by 系统
Analysis Method : D:\LC\DATA\ZBK\ZBK-3-38RAC-2 2021-04-16 10-52-38\P1-AD-H-80-20-254NM-1ML-
                SUL-20MIN.M (Sequence Method)
Last changed   : 7/28/2021 8:32:22 PM by 系统
                (modified after loading)
Additional Info : Peak(s) manually integrated
  
```

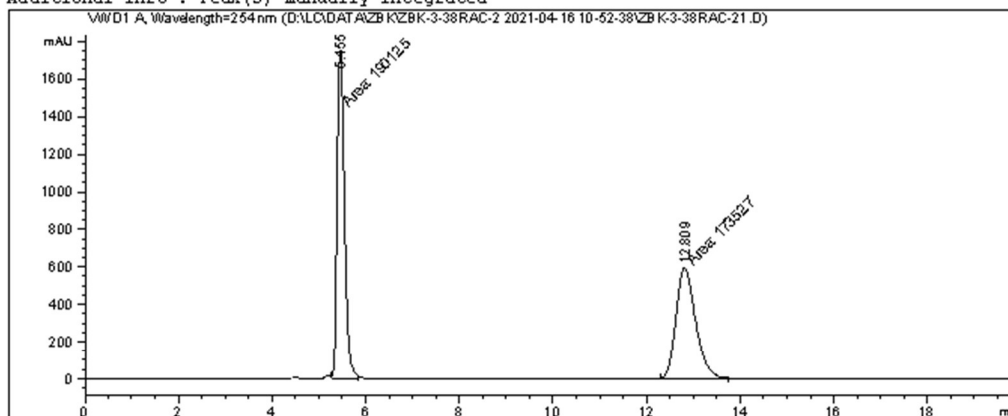

## Area Percent Report

```

Sorted By      :      Signal
Multiplier     :      1.0000
Dilution       :      1.0000
Do not use Multiplier & Dilution Factor with ISTDs
  
```

Signal 1: WVD1 A, Wavelength=254 nm

| Peak # | RetTime [min] | Type | Width [min] | Area [mAU*s] | Height [mAU] | Area %  |
|--------|---------------|------|-------------|--------------|--------------|---------|
| 1      | 5.455         | MF   | 0.1810      | 1.90125e4    | 1750.67407   | 52.2822 |
| 2      | 12.809        | FM   | 0.4866      | 1.73527e4    | 594.37946    | 47.7178 |

Totals : 3.63652e4 2345.05353

\*\*\* End of Report \*\*\*



# HPLC chromatogram of compound (1S,3R,4R)-3C



Data File D:\LC\DATA\ZBK\ZBK-3-38-2 2021-04-16 09-50-42\ZBK-3-38-21.D  
 Sample Name: ZBK-3-38R

```

=====
Acq. Operator   : 系统                               Seq. Line :    2
Sample Operator : 系统                               Location  :    3
Acq. Instrument : 1200                               Inj       :    1
Injection Date  : 4/16/2021 9:54:56 AM              Inj Volume: 5.000 µl
Acq. Method     : D:\LC\DATA\ZBK\ZBK-3-38-2 2021-04-16 09-50-42\P1-AD-H-80-20-254NM-1ML-5UL-20MIN.M
Last changed    : 1/14/2021 2:49:11 PM by 系统
Analysis Method : D:\LC\DATA\ZBK\ZBK-3-38-2 2021-04-16 09-50-42\P1-AD-H-80-20-254NM-1ML-5UL-20MIN.M (Sequence Method)
Last changed    : 7/28/2021 8:34:32 PM by 系统
                  (modified after loading)
Additional Info : Peak(s) manually integrated
  
```

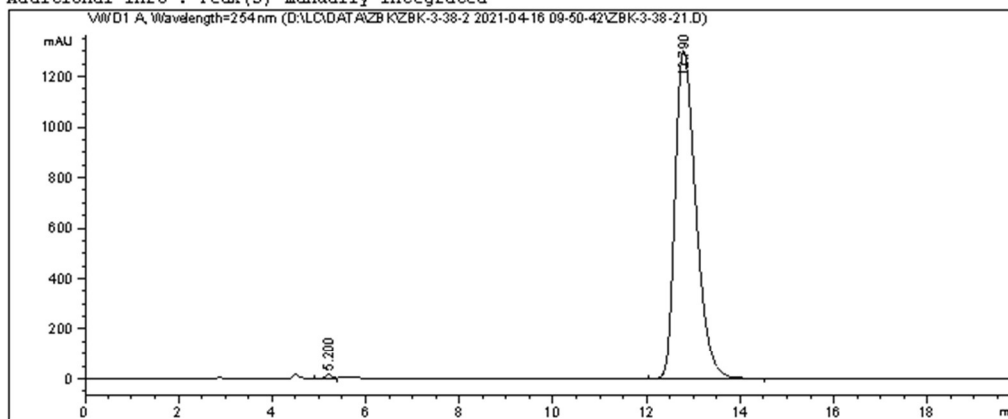

## Area Percent Report

```

Sorted By      :      Signal
Multiplier     :      1.0000
Dilution       :      1.0000
Do not use Multiplier & Dilution Factor with ISTDs
  
```

Signal 1: VWD1 A, Wavelength=254 nm

| Peak # | RetTime [min] | Type | Width [min] | Area [mAU*s] | Height [mAU] | Area %  |
|--------|---------------|------|-------------|--------------|--------------|---------|
| 1      | 5.200         | BV   | 0.1296      | 133.98087    | 15.54926     | 0.3321  |
| 2      | 12.790        | BB   | 0.4784      | 4.02095e4    | 1301.41541   | 99.6679 |

Totals :                                    4.03435e4  1316.96467

\*\*\* End of Report \*\*\*

# HPLC chromatogram of compound (rac)-3D

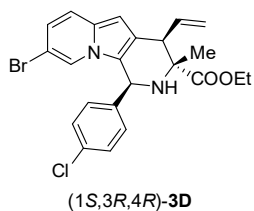

Data File E:\DATA\ZBK\ZBK-3-22-23RAC-2 2021-04-01 22-18-53\ZBK-3-22-23RAC-21.D  
 Sample Name: ZBK-3-22-23RAC

```

=====
Acq. Operator   : SYSTEM                               Seq. Line :    2
Acq. Instrument : 1260                                 Location  :   23
Injection Date  : 4/1/2021 10:31:58 PM                 Inj       :    1
                                                    Inj Volume: 5.000 µl

Acq. Method     : E:\DATA\ZBK\ZBK-3-22-23RAC-2 2021-04-01 22-18-53\4-IE--95-5-1ML-20MIN-5UL-254NM-DAD.M
Last changed    : 4/1/2021 10:18:54 PM by SYSTEM
Analysis Method : E:\DATA\ZBK\ZBK-3-22-23RAC-2 2021-04-01 22-18-53\4-IE--95-5-1ML-20MIN-5UL-254NM-DAD.M (Sequence Method)
Last changed    : 7/29/2021 3:37:53 PM by SYSTEM
                  (modified after loading)
Additional Info  : Peak(s) manually integrated
  
```

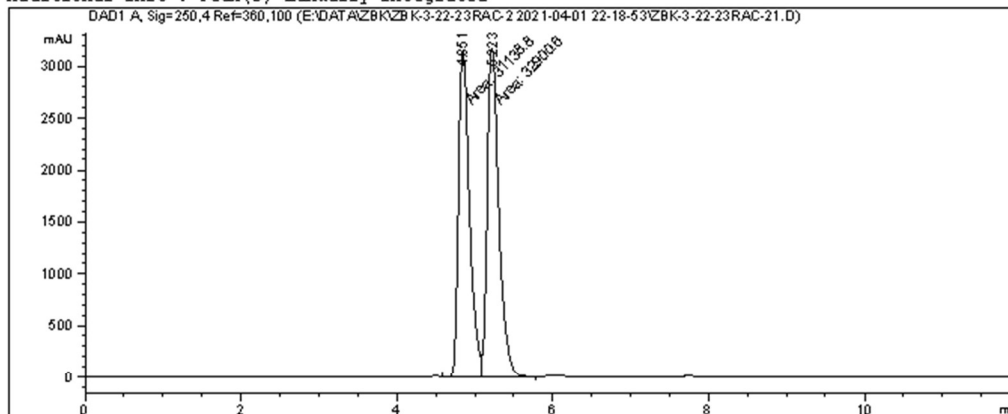

## Area Percent Report

```

Sorted By      :      Signal
Multiplier     :      1.0000
Dilution       :      1.0000
Do not use Multiplier & Dilution Factor with ISTDs
  
```

Signal 1: DAD1 A, Sig=250,4 Ref=360,100

| Peak # | RetTime [min] | Type | Width [min] | Area [mAU*s] | Height [mAU] | Area %  |
|--------|---------------|------|-------------|--------------|--------------|---------|
| 1      | 4.851         | MM   | 0.1650      | 3.11388e4    | 3144.90674   | 48.6244 |
| 2      | 5.223         | MF   | 0.1729      | 3.29006e4    | 3171.80933   | 51.3756 |

Totals :                    6.40394e4  6316.71606

\*\*\* End of Report \*\*\*

# HPLC chromatogram of compound (1S,3R,4R)-3D



Data File E:\DATA\ZBK\ZBK-3-22-23RAC-2 2021-04-01 22-18-53\ZBK-3-22-23RAC-23.D  
 Sample Name: ZBK-3-22-2

```

=====
Acq. Operator   : SYSTEM                      Seq. Line :    4
Acq. Instrument : 1260                          Location  :    3
Injection Date  : 4/1/2021 11:05:12 PM        Inj       :    1
                                           Inj Volume: 5.000 µl

Acq. Method     : E:\DATA\ZBK\ZBK-3-22-23RAC-2 2021-04-01 22-18-53\4-IE--95-5-1ML-20MIN-SUL-
254NM-DAD.M
Last changed    : 4/1/2021 10:18:54 PM by SYSTEM
Analysis Method : E:\DATA\ZBK\ZBK-3-22-23RAC-2 2021-04-01 22-18-53\4-IE--95-5-1ML-20MIN-SUL-
254NM-DAD.M (Sequence Method)
Last changed    : 7/29/2021 3:40:38 PM by SYSTEM
                 (modified after loading)
Additional Info  : Peak(s) manually integrated
  
```

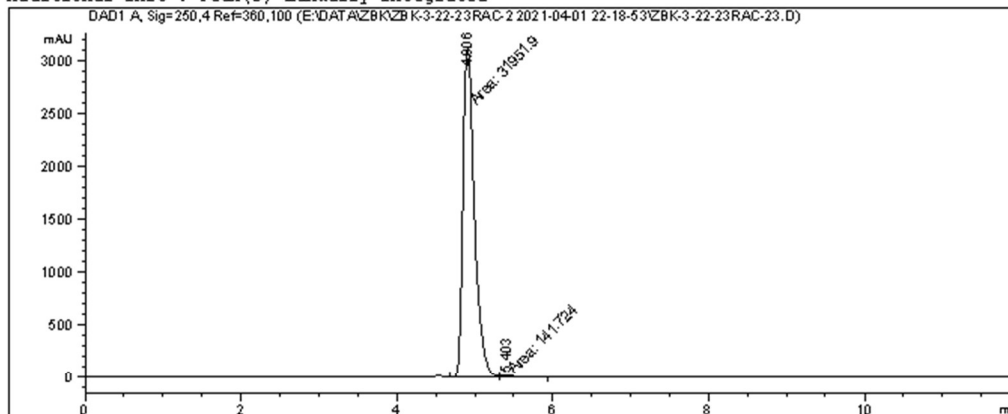

## Area Percent Report

```

Sorted By      : Signal
Multiplier     : 1.0000
Dilution       : 1.0000
Do not use Multiplier & Dilution Factor with ISTDs
  
```

Signal 1: DAD1 A, Sig=250,4 Ref=360,100

| Peak # | RetTime [min] | Type | Width [min] | Area [mAU*s] | Height [mAU] | Area %  |
|--------|---------------|------|-------------|--------------|--------------|---------|
| 1      | 4.906         | FM   | 0.1708      | 3.19519e4    | 3117.61450   | 99.5584 |
| 2      | 5.403         | FM   | 0.2133      | 141.72401    | 11.07572     | 0.4416  |

Totals : 3.20936e4 3128.69022

\*\*\* End of Report \*\*\*

# HPLC chromatogram of compound (rac)-3E

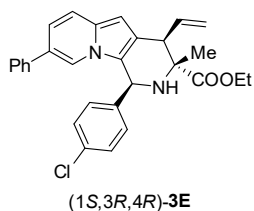

Data File D:\LC\DATA\ZBK\ZBK-3-26-27-2 2021-04-06 10-43-51\ZBK-3-26-27-22.D  
 Sample Name: ZBK-3-26-27RAC

```

=====
Acq. Operator   : 系统                               Seq. Line :    3
Sample Operator : 系统
Acq. Instrument : 1200                               Location  :   41
Injection Date  : 4/6/2021 11:27:23 AM              Inj       :    1
                                                    Inj Volume: 5.000 µl
Acq. Method     : D:\LC\DATA\ZBK\ZBK-3-26-27-2 2021-04-06 10-43-51\P1-AD-H-95-5-254NM-1ML-5ul
                  -30min.M
Last changed    : 12/29/2020 2:58:55 PM by 系统
Analysis Method : D:\LC\DATA\ZBK\ZBK-3-26-27-2 2021-04-06 10-43-51\P1-AD-H-95-5-254NM-1ML-5ul
                  -30min.M (Sequence Method)
Last changed    : 7/28/2021 8:27:28 PM by 系统
                  (modified after loading)
Additional Info : Peak(s) manually integrated
  
```

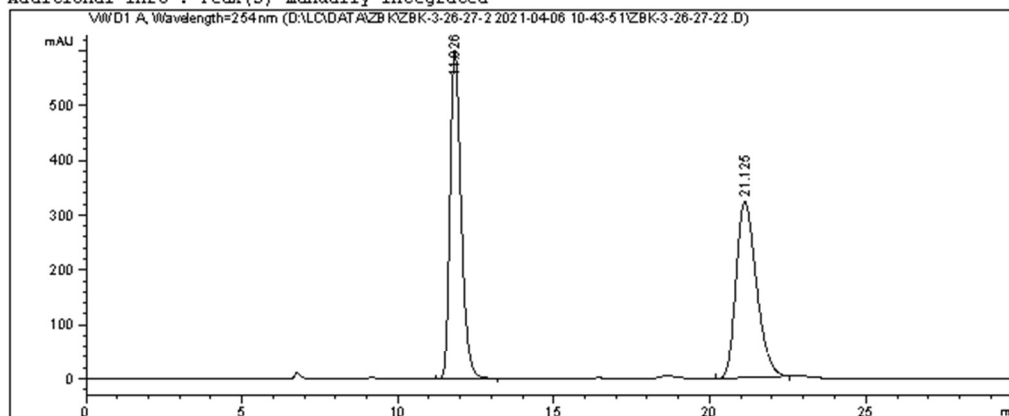

## Area Percent Report

```

Sorted By      :      Signal
Multiplier     :      1.0000
Dilution       :      1.0000
Do not use Multiplier & Dilution Factor with ISTDs
  
```

Signal 1: WVD1 A, Wavelength=254 nm

| Peak #   | RetTime [min] | Type | Width [min] | Area [mAU*s] | Height [mAU] | Area %  |
|----------|---------------|------|-------------|--------------|--------------|---------|
| 1        | 11.826        | BV R | 0.3764      | 1.47906e4    | 600.00867    | 50.2081 |
| 2        | 21.125        | BB   | 0.6980      | 1.46680e4    | 323.45261    | 49.7919 |
| Totals : |               |      |             | 2.94585e4    | 923.46127    |         |

\*\*\* End of Report \*\*\*

# HPLC chromatogram of compound (1S,3R,4R)-3E



Data File D:\LC\DATA\ZBK\ZBK-3-26-27-2 2021-04-06 10-43-51\ZBK-3-26-27-21.D  
 Sample Name: ZBK-3-26

```

=====
Acq. Operator   : 系统                               Seq. Line :    2
Sample Operator : 系统
Acq. Instrument : 1200                               Location  :    3
Injection Date  : 4/6/2021 10:56:08 AM              Inj       :    1
                                                    Inj Volume: 5.000 µl
Acq. Method     : D:\LC\DATA\ZBK\ZBK-3-26-27-2 2021-04-06 10-43-51\P1-AD-H-95-5-254NM-1ML-5ul
                -30min.M
Last changed    : 12/29/2020 2:58:55 PM by 系统
Analysis Method : D:\LC\DATA\ZBK\ZBK-3-26-27-2 2021-04-06 10-43-51\P1-AD-H-95-5-254NM-1ML-5ul
                -30min.M (Sequence Method)
Last changed    : 7/28/2021 8:29:46 PM by 系统
                (modified after loading)
Additional Info : Peak(s) manually integrated
  
```

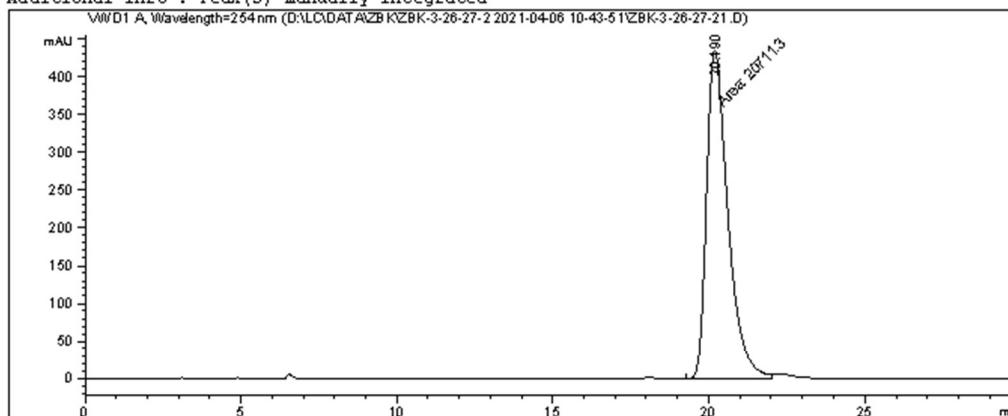

## Area Percent Report

```

Sorted By      :      Signal
Multiplier     :      1.0000
Dilution       :      1.0000
Do not use Multiplier & Dilution Factor with ISTDs
  
```

Signal 1: VWD1 A, Wavelength=254 nm

| Peak # | RetTime [min] | Type | Width [min] | Area [mAU*s] | Height [mAU] | Area %   |
|--------|---------------|------|-------------|--------------|--------------|----------|
| 1      | 20.190        | MF   | 0.7946      | 2.07113e4    | 434.41125    | 100.0000 |

Totals :                                    2.07113e4    434.41125

\*\*\* End of Report \*\*\*

# HPLC chromatogram of compound (rac)-4

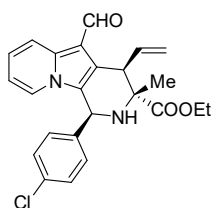

(1S,3R,4R)-4

Data File D:\LC\DATA\ZBK\ZBK-3-87-102RAC 2021-07-09 10-28-45\ZBK-3-87-102RAC.D  
 Sample Name: ZBK-3-87-102RAC

```

=====
Acq. Operator   : 系统                               Seq. Line :    1
Sample Operator : 系统
Acq. Instrument : 1200                               Location  :   41
Injection Date  : 7/9/2021 10:30:10 AM              Inj       :    1
                                                    Inj Volume: 5.000 µl
Acq. Method     : D:\LC\DATA\ZBK\ZBK-3-87-102RAC 2021-07-09 10-28-45\P1-AD-H-80-20-254NM-1ML-
                  SUL-20MIN.M
Last changed    : 1/14/2021 2:49:11 PM by 系统
Analysis Method : D:\LC\DATA\ZBK\ZBK-3-87-102RAC 2021-07-09 10-28-45\P1-AD-H-80-20-254NM-1ML-
                  SUL-20MIN.M (Sequence Method)
Last changed    : 7/28/2021 9:16:20 PM by 系统
                  (modified after loading)
Additional Info : Peak(s) manually integrated
    
```

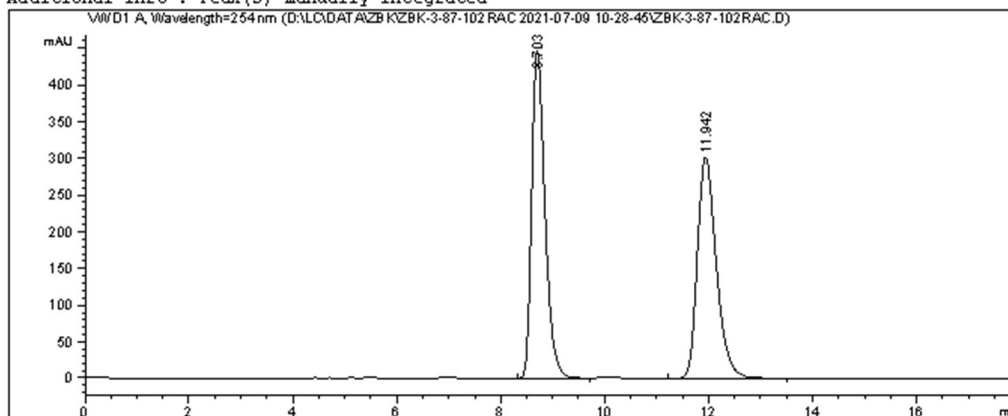

## Area Percent Report

```

Sorted By      :      Signal
Multiplier     :      1.0000
Dilution       :      1.0000
Do not use Multiplier & Dilution Factor with ISTDs
    
```

Signal 1: VWD1 A, Wavelength=254 nm

| Peak #   | RetTime [min] | Type | Width [min] | Area [mAU*s] | Height [mAU] | Area %  |
|----------|---------------|------|-------------|--------------|--------------|---------|
| 1        | 8.703         | BB   | 0.2717      | 7960.23828   | 447.23532    | 50.9437 |
| 2        | 11.942        | VV R | 0.3886      | 7665.32520   | 302.76563    | 49.0563 |
| Totals : |               |      |             | 1.56256e4    | 750.00095    |         |

\*\*\* End of Report \*\*\*

# HPLC chromatogram of compound (1S,3R,4R)-4

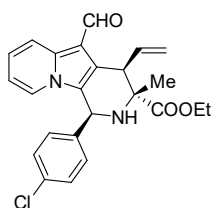

(1S,3R,4R)-4

Data File D:\LC\DATA\ZBK\ZBK-3-102 2021-07-08 11-09-03\ZBK-3-102.D  
 Sample Name: ZBK-3-102

```

=====
Acq. Operator   : 系统                               Seq. Line :    1
Sample Operator : 系统                               Location  :   31
Acq. Instrument : 1200                               Inj       :    1
Injection Date  : 7/8/2021 11:10:28 AM              Inj Volume: 5.000 µl
Acq. Method    : D:\LC\DATA\ZBK\ZBK-3-102 2021-07-08 11-09-03\P1-AD-H-80-20-254NM-1ML-SUL-
                20MIN.M
Last changed   : 1/14/2021 2:49:11 PM by 系统
Analysis Method : D:\LC\DATA\ZBK\ZBK-3-102 2021-07-08 11-09-03\P1-AD-H-80-20-254NM-1ML-SUL-
                20MIN.M (Sequence Method)
Last changed   : 7/28/2021 9:17:59 PM by 系统
                (modified after loading)
Additional Info : Peak(s) manually integrated
    
```

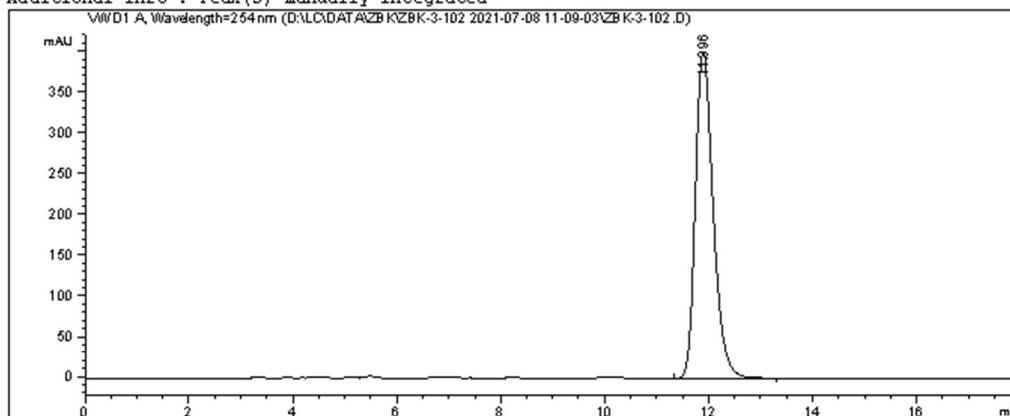

## Area Percent Report

```

Sorted By      :      Signal
Multiplier     :      1.0000
Dilution       :      1.0000
Do not use Multiplier & Dilution Factor with ISTDs
    
```

Signal 1: VWD1 A, Wavelength=254 nm

| Peak # | RetTime [min] | Type | Width [min] | Area [mAU*s] | Height [mAU] | Area %   |
|--------|---------------|------|-------------|--------------|--------------|----------|
| 1      | 11.896        | BB   | 0.3630      | 9564.50098   | 402.67850    | 100.0000 |

Totals : 9564.50098 402.67850

\*\*\* End of Report \*\*\*

# HPLC chromatogram of compound (rac)-5

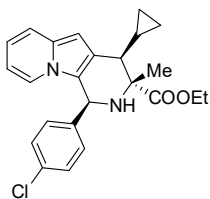

(1S,3R,4R)-5

Data File D:\LC\DATA\ZBK\ZBK-3-96RAC 2021-07-27 12-04-20\ZBK-3-96RAC.D  
 Sample Name: ZBK-3-96RAC

```

=====
Acq. Operator   : 系统                      Seq. Line :    1
Sample Operator : 系统
Acq. Instrument : 1200                      Location  :    21
Injection Date  : 7/27/2021 12:05:45 PM      Inj       :    1
                                           Inj Volume: 5.000 µl
Acq. Method    : D:\LC\DATA\ZBK\ZBK-3-96RAC 2021-07-27 12-04-20\P1-AD-H-90-10-254NM-1ML-SUL-
30MIN.M
Last changed   : 7/27/2021 12:05:56 PM by 系统
                (modified after loading)
Analysis Method: D:\LC\DATA\ZBK\ZBK-3-96RAC 2021-07-27 12-04-20\P1-AD-H-90-10-254NM-1ML-SUL-
30MIN.M (Sequence Method)
Last changed   : 7/28/2021 9:11:23 PM by 系统
                (modified after loading)
Additional Info: Peak(s) manually integrated
    
```

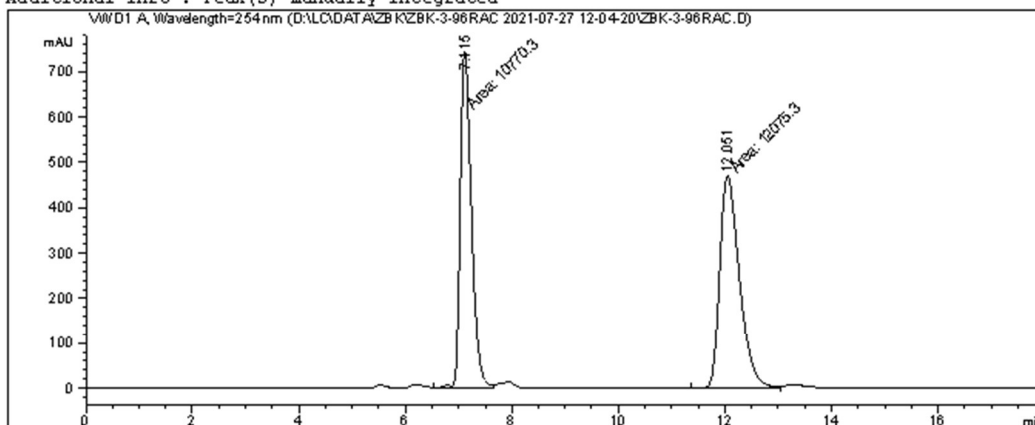

=====  
 Area Percent Report  
 =====

```

Sorted By      :      Signal
Multiplier     :      1.0000
Dilution       :      1.0000
Do not use Multiplier & Dilution Factor with ISTDs
    
```

Signal 1: VWD1 A, Wavelength=254 nm

| Peak # | RetTime [min] | Type | Width [min] | Area [mAU*s] | Height [mAU] | Area %  |
|--------|---------------|------|-------------|--------------|--------------|---------|
| 1      | 7.115         | MF   | 0.2414      | 1.07703e4    | 743.47247    | 47.1437 |
| 2      | 12.051        | MF   | 0.4279      | 1.20753e4    | 470.28445    | 52.8563 |

Totals :                                    2.28456e4   1213.75693

=====  
 \*\*\* End of Report \*\*\*



# HPLC chromatogram of compound (1S,3R,4R)-5



(1S,3R,4R)-5

Data File D:\LC\DATA\ZBK\ZBK-3-96-2 2021-07-27 09:57:42\ZBK-3-96-22.D  
 Sample Name: ZBK-3-96-1

```

=====
Acq. Operator   : 系统                               Seq. Line :    3
Sample Operator : 系统                               Location  :   14
Acq. Instrument : 1200                               Inj       :    1
Injection Date  : 7/27/2021 10:46:33 AM             Inj Volume: 5.000 µl
Acq. Method    : D:\LC\DATA\ZBK\ZBK-3-96-2 2021-07-27 09:57:42\P1-AD-H-90-10-254NM-1ML-5UL-30MIN.M
Last changed   : 7/27/2021 10:45:19 AM by 系统
Analysis Method: D:\LC\DATA\ZBK\ZBK-3-96-2 2021-07-27 09:57:42\P1-AD-H-90-10-254NM-1ML-5UL-30MIN.M (Sequence Method)
Last changed   : 7/28/2021 9:13:07 PM by 系统
                (modified after loading)
Additional Info : Peak(s) manually integrated
  
```

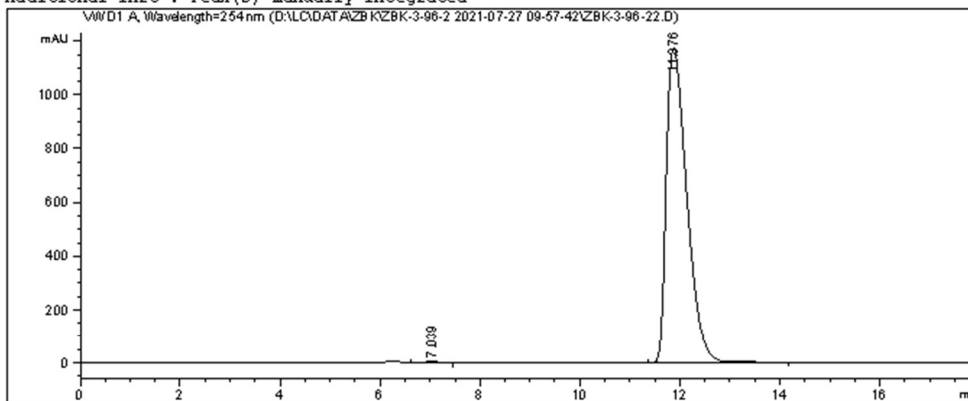

## Area Percent Report

```

Sorted By      :      Signal
Multiplier     :      1.0000
Dilution       :      1.0000
Do not use Multiplier & Dilution Factor with ISTDs
  
```

Signal 1: WWD1 A, Wavelength=254 nm

| Peak # | RetTime [min] | Type | Width [min] | Area [mAU*s] | Height [mAU] | Area %  |
|--------|---------------|------|-------------|--------------|--------------|---------|
| 1      | 7.039         | VB   | 0.2674      | 71.79204     | 4.00496      | 0.2133  |
| 2      | 11.876        | EV R | 0.4443      | 3.35930e4    | 1174.70117   | 99.7867 |

Totals : 3.36648e4 1178.70613

\*\*\* End of Report \*\*\*

# HPLC chromatogram of compound (rac)-6

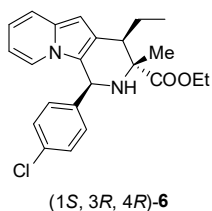

Data File D:\LC\DATA\ZBK\ZBK-3-115-2 2021-08-24 15-46-59\ZBK-3-115-25.D  
 Sample Name: ZBK-3-115RAC

```

=====
Acq. Operator   : 系统                               Seq. Line :    6
Sample Operator : 系统
Acq. Instrument : 1200                               Location  :   43
Injection Date  : 8/24/2021 5:37:06 PM              Inj       :    1
                                                    Inj Volume: 5.000 µl
Acq. Method     : D:\LC\DATA\ZBK\ZBK-3-115-2 2021-08-24 15-46-59\P1-AD-H-90-10-254NM-1ML-5UL-30MIN.M
Last changed    : 8/24/2021 4:53:24 PM by 系统
Analysis Method : D:\LC\DATA\ZBK\ZBK-3-115-2 2021-08-24 15-46-59\P1-AD-H-90-10-254NM-1ML-5UL-30MIN.M (Sequence Method)
Last changed    : 11/22/2022 4:46:37 PM by 系统
                  (modified after loading)
Additional Info : Peak(s) manually integrated
  
```

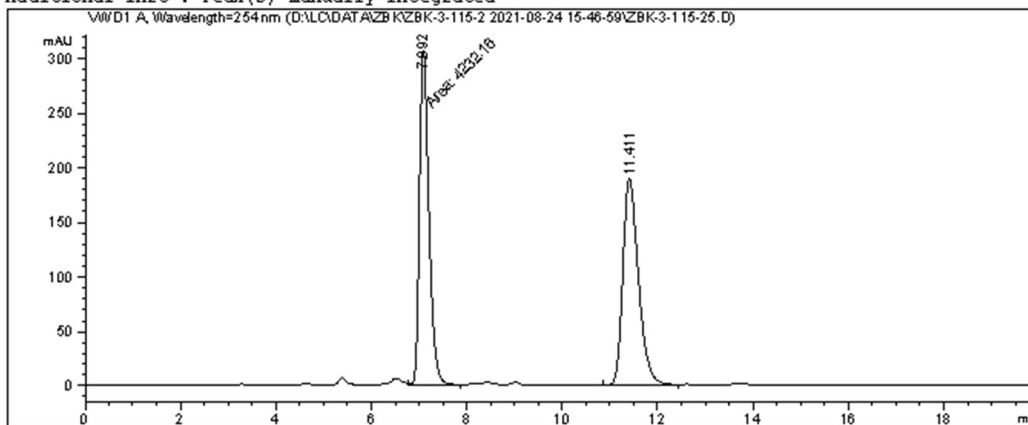

## Area Percent Report

```

Sorted By      :      Signal
Multiplier     :      1.0000
Dilution      :      1.0000
Do not use Multiplier & Dilution Factor with ISTDs
  
```

Signal 1: WWD1 A, Wavelength=254 nm

| Peak # | RetTime [min] | Type | Width [min] | Area [mAU*s] | Height [mAU] | Area %  |
|--------|---------------|------|-------------|--------------|--------------|---------|
| 1      | 7.092         | FM   | 0.2297      | 4232.15576   | 307.08786    | 49.5648 |
| 2      | 11.411        | BV R | 0.3483      | 4306.48291   | 189.38510    | 50.4352 |

Totals : 8538.63867 496.47296

\*\*\* End of Report \*\*\*

# HPLC chromatogram of compound (1S,3R,4R)-6

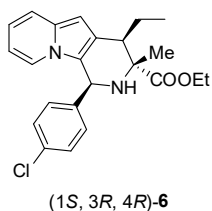

Data File D:\LC\DATA\ZBK\ZBK-3-115-3 2021-08-24 19-14-22\ZBK-3-115-32.D  
 Sample Name: ZBK-3-115-1

```

=====
Acq. Operator   : 系統                               Seq. Line :    3
Sample Operator : 系統                               Location  :   41
Acq. Instrument : 1200                               Inj       :    2
Injection Date  : 8/24/2021 7:48:50 PM              Inj Volume: 5.000 µl
Acq. Method    : D:\LC\DATA\ZBK\ZBK-3-115-3 2021-08-24 19-14-22\P1-AD-H-90-10-254NM-1ML-5UL-30MIN.M
Last changed   : 8/24/2021 7:22:48 PM by 系統
Analysis Method : D:\LC\DATA\ZBK\ZBK-3-115-3 2021-08-24 19-14-22\P1-AD-H-90-10-254NM-1ML-5UL-30MIN.M (Sequence Method)
Last changed   : 11/22/2022 5:04:07 PM by 系統
                (modified after loading)
Additional Info : Peak(s) manually integrated
  
```

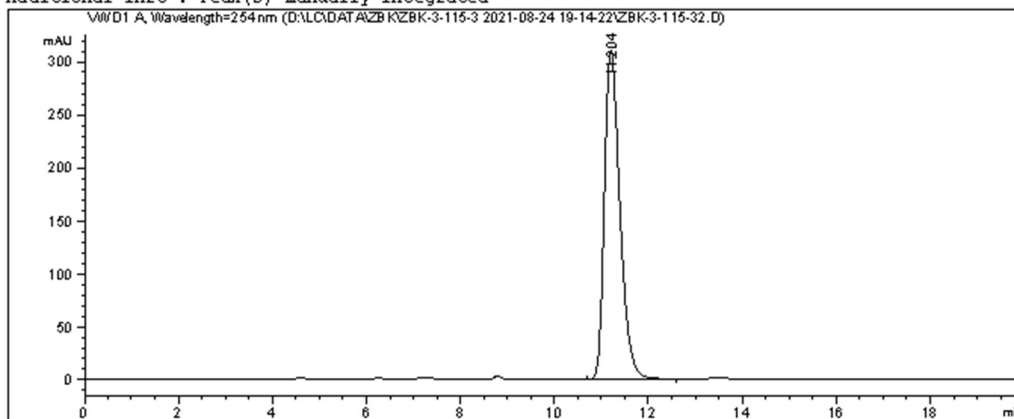

## Area Percent Report

```

Sorted By      :      Signal
Multiplier     :      1.0000
Dilution       :      1.0000
Do not use Multiplier & Dilution Factor with ISTDs
  
```

Signal 1: VWD1 A, Wavelength=254 nm

| Peak # | RetTime [min] | Type | Width [min] | Area [mAU*s] | Height [mAU] | Area %   |
|--------|---------------|------|-------------|--------------|--------------|----------|
| 1      | 11.204        | BV R | 0.3506      | 7129.33496   | 310.83817    | 100.0000 |

Totals :                                    7129.33496    310.83817

\*\*\* End of Report \*\*\*

# HPLC chromatogram of compound (rac)-7

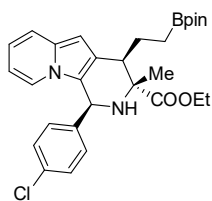

(1S,3R,4R)-7

Data File D:\LC\DATA\ZBK\ZBK-3-105-4 2021-07-07 15-16-09\ZBK-3-105-45.D  
 Sample Name: ZBK-3-105RAC

```

=====
Acq. Operator   : 系统                               Seq. Line :    6
Sample Operator : 系统
Acq. Instrument : 1200                               Location  :   41
Injection Date  : 7/7/2021 5:30:58 PM                Inj       :    1
                                                    Inj Volume: 5.000 µl
Acq. Method     : D:\LC\DATA\ZBK\ZBK-3-105-4 2021-07-07 15-16-09\P1-AD-H-95-5-254NM-1ML-5ul-30min.M
Last changed    : 7/7/2021 5:29:46 PM by 系统
Analysis Method : D:\LC\DATA\ZBK\ZBK-3-105-4 2021-07-07 15-16-09\P1-AD-H-95-5-254NM-1ML-5ul-30min.M (Sequence Method)
Last changed    : 7/28/2021 9:26:07 PM by 系统
                  (modified after loading)
Additional Info : Peak(s) manually integrated
  
```

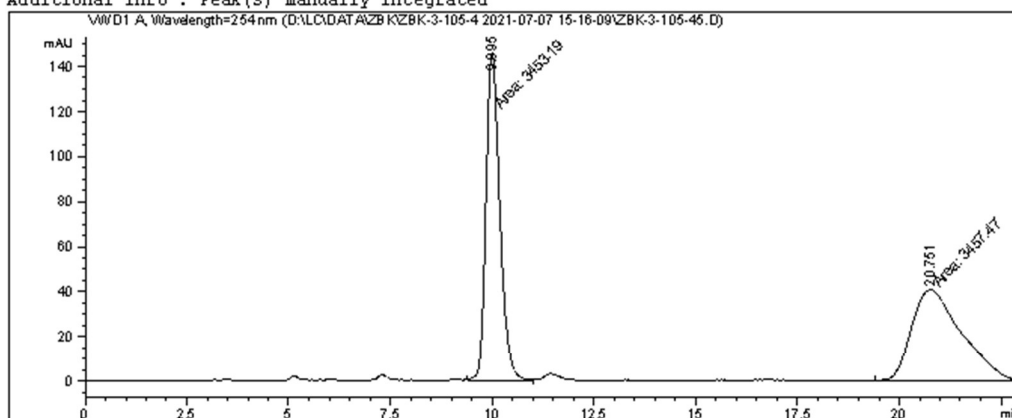

## Area Percent Report

```

Sorted By      : Signal
Multiplier     : 1.0000
Dilution       : 1.0000
Do not use Multiplier & Dilution Factor with ISTDs
  
```

Signal 1: VWD1 A, Wavelength=254 nm

| Peak # | RetTime [min] | Type | Width [min] | Area [mAU*s] | Height [mAU] | Area %  |
|--------|---------------|------|-------------|--------------|--------------|---------|
| 1      | 9.995         | FM   | 0.3950      | 3453.18652   | 145.71432    | 49.9690 |
| 2      | 20.751        | MF   | 1.4169      | 3457.47314   | 40.66933     | 50.0310 |

Totals : 6910.65967 186.38366

\*\*\* End of Report \*\*\*

# HPLC chromatogram of compound (1*S*,3*R*,4*R*)-7



(1*S*,3*R*,4*R*)-7

Data File D:\LC\DATA\ZBK\ZBK-3-105-3 2021-07-05 14-46-27\ZBK-3-105-33.D  
 Sample Name: ZBK-3-105-2

```

=====
Acq. Operator   : 系统                               Seq. Line :    4
Sample Operator : 系统
Acq. Instrument : 1200                               Location  :   63
Injection Date  : 7/5/2021 3:57:25 PM                Inj       :    1
                                                    Inj Volume: 5.000 µl
Acq. Method     : D:\LC\DATA\ZBK\ZBK-3-105-3 2021-07-05 14-46-27\P1-AD-H-95-5-254NM-1ML-5ul-
                  30min.M
Last changed    : 7/5/2021 3:56:09 PM by 系统
Analysis Method : D:\LC\DATA\ZBK\ZBK-3-105-3 2021-07-05 14-46-27\P1-AD-H-95-5-254NM-1ML-5ul-
                  30min.M (Sequence Method)
Last changed    : 7/28/2021 9:22:06 PM by 系统
                  (modified after loading)
Additional Info  : Peak(s) manually integrated
    
```

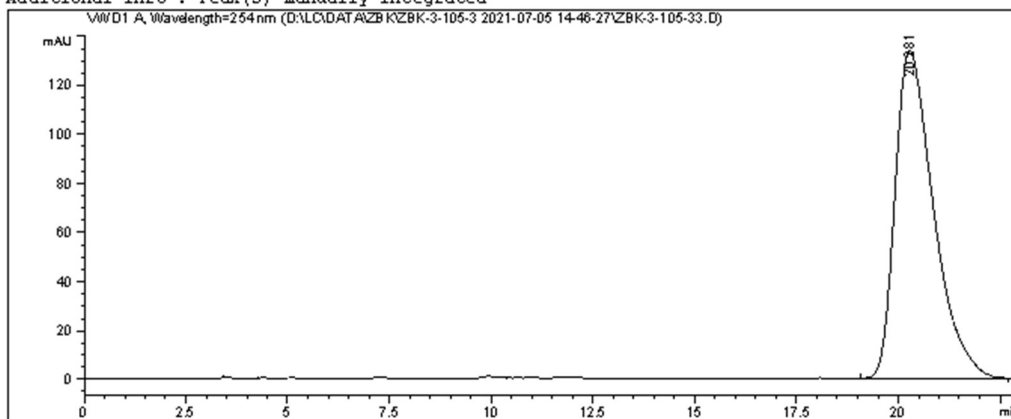

## Area Percent Report

```

Sorted By      : Signal
Multiplier     : 1.0000
Dilution       : 1.0000
Do not use Multiplier & Dilution Factor with ISTDs
    
```

Signal 1: VWD1 A, Wavelength=254 nm

| Peak # | RetTime [min] | Type | Width [min] | Area [mAU*s] | Height [mAU] | Area %   |
|--------|---------------|------|-------------|--------------|--------------|----------|
| 1      | 20.281        | VV R | 0.9891      | 8826.41992   | 133.86732    | 100.0000 |

Totals : 8826.41992 133.86732

\*\*\* End of Report \*\*\*

## Computational Details

All calculations were performed with Gaussian 09<sup>[1]</sup> at the M06-L<sup>[2]</sup> level of density functional theory. The M06-L functional and a mixed basis set of SDD<sup>[3]</sup> for Cu, Fe, and Ir and 6-31G(d) for other atoms were used for geometry optimizations and frequency calculations. Frequency outcomes were examined to confirm the stationary points as minima (no imaginary frequencies) or transition states (only one imaginary frequency). Single-point energies were then calculated with M06-L functional and the def2-TZVP<sup>[4]</sup> basis set for all atoms, in which the solvation effects were modeled by SMD<sup>[5]</sup> in CH<sub>2</sub>Cl<sub>2</sub> ( $\epsilon = 8.93$ ) solvent. Free energies (kcal/mol) in solution were utilized in the discussions. The optimized geometries were represented by using CYLView.<sup>[6]</sup>

1. Frisch, M. J.; Trucks, G. W.; Schlegel, H. B.; Scuseria, G. E.; Robb, M. A.; Cheeseman, J. R.; Scalmani, G.; Barone, V.; Mennucci, B.; Petersson, G. A.; Nakatsuji, H.; Caricato, M.; Li, X.; Hratchian, H. P.; Izmaylov, A. F.; Bloino, J.; Zheng, G.; Sonnenberg, J. L.; Hada, M.; Ehara, M.; Toyota, K.; Fukuda, R.; Hasegawa, J.; Ishida, M.; Nakajima, T.; Honda, Y.; Kitao, O.; Nakai, H.; Vreven, T.; Montgomery, J. A., Jr.; Peralta, J. E.; Ogliaro, F.; Bearpark, M.; Heyd, J. J.; Brothers, E.; Kudin, K. N.; Staroverov, V. N.; Kobayashi, R.; Normand, J.; Raghavachari, K.; Rendell, A.; Burant, J. C.; Iyengar, S. S.; Tomasi, J.; Cossi, M.; Rega, N.; Millam, N. J.; Klene, M.; Knox, J. E.; Cross, J. B.; Bakken, V.; Adamo, C.; Jaramillo, J.; Gomperts, R.; Stratmann, R. E.; Yazyev, O.; Austin, A. J.; Cammi, R.; Pomelli, C.; Ochterski, J. W.; Martin, R. L.; Morokuma, K.; Zakrzewski, V. G.; Voth, G. A.; Salvador, P.; Dannenberg, J. J.; Dapprich, S.; Daniels, A. D.; Farkas, Ö.; Foresman, J. B.; Ortiz, J. V.; Cioslowski, J.; Fox, D. J. *Gaussian 09*; Gaussian, Inc.: Wallingford, CT, 2009.
2. (a) Zhao, Y.; Truhlar, D. G. Density Functionals with Broad Applicability in Chemistry. *Acc. Chem. Res.* **2008**, *41*, 157–167. (b) Zhao, Y.; Truhlar, D. G. The M06 Suite of Density Functionals for Main Group Thermochemistry, Thermochemical Kinetics, Noncovalent Interactions, Excited States, and Transition Elements: Two New Functionals and Systematic Testing of Four M06-Class Functionals and 12 Other Functionals. *Theor. Chem. Acc.* **2008**, *120*, 215–241.
3. (a) Andrae, D.; Häussermann, U.; Dolg, M.; Stoll, H.; Preuss, H. Energy-Adjusted *ab initio* pseudopotentials for the second and third row transition elements. *Theor. Chim. Acta* **1990**, *77*, 123–141. (b) Roy, L. E.; Hay, P. J.; Martin, R. L. Revised basis sets for the LANL effective core potentials. *J. Chem. Theory Comput.* **2008**, *4*, 1029–1031.
4. Weigend, F.; Ahlrichs, R. Balanced Basis Sets of Split Valence, Triple Zeta Valence and Quadruple Zeta Valence Quality for H to Rn: Design and Assessment of Accuracy. *Phys. Chem. Chem. Phys.* **2005**, *7*, 3297–3305.
5. Marenich, A. V.; Cramer, C. J.; Truhlar, D. G. Universal solvation model based on solute electron density and on a continuum model of the solvent defined by the bulk dielectric constant and atomic surface tensions. *J. Phys. Chem. B* **2009**, *113*, 6378–6396.
6. Legault, C. Y. *CYLview, 1.0b*; Université de Sherbrooke, 2009. <http://www.cylview.org>.

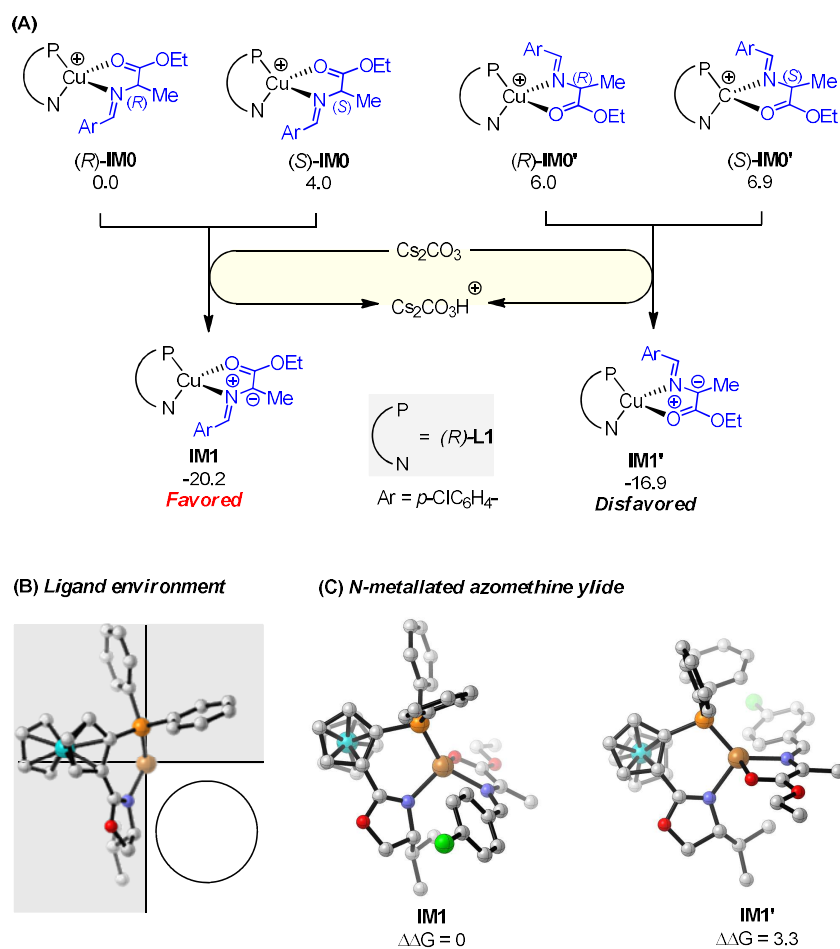

**Fig. S3.** (A) In situ generation of prochiral nucleophile **IM1**. Free energies are given in kcal/mol. (B) and (C) Structures of diastereomeric prochiral nucleophiles **IM1** and **IM1'**.

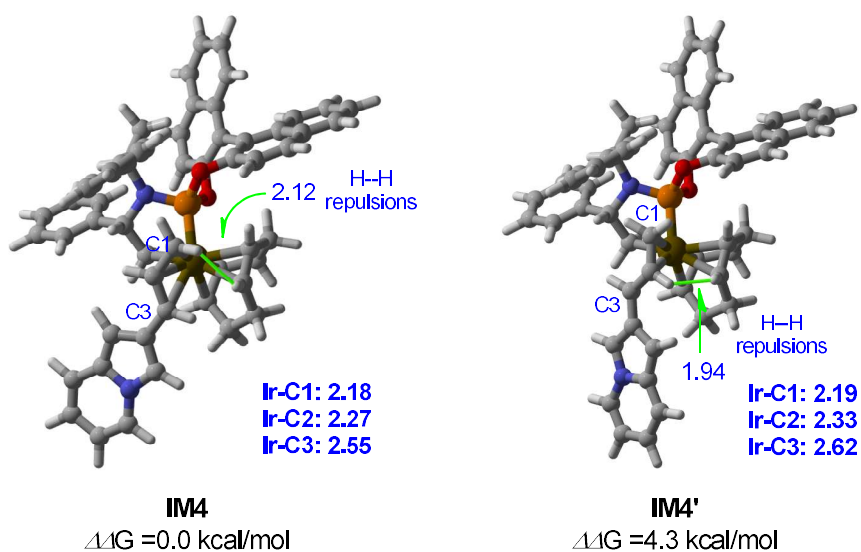

**Fig. S4.** Optimized structures of the  $\pi$ -allyliridium(III) species **IM4** and **IM4'**, with selected bond distances given in Å.

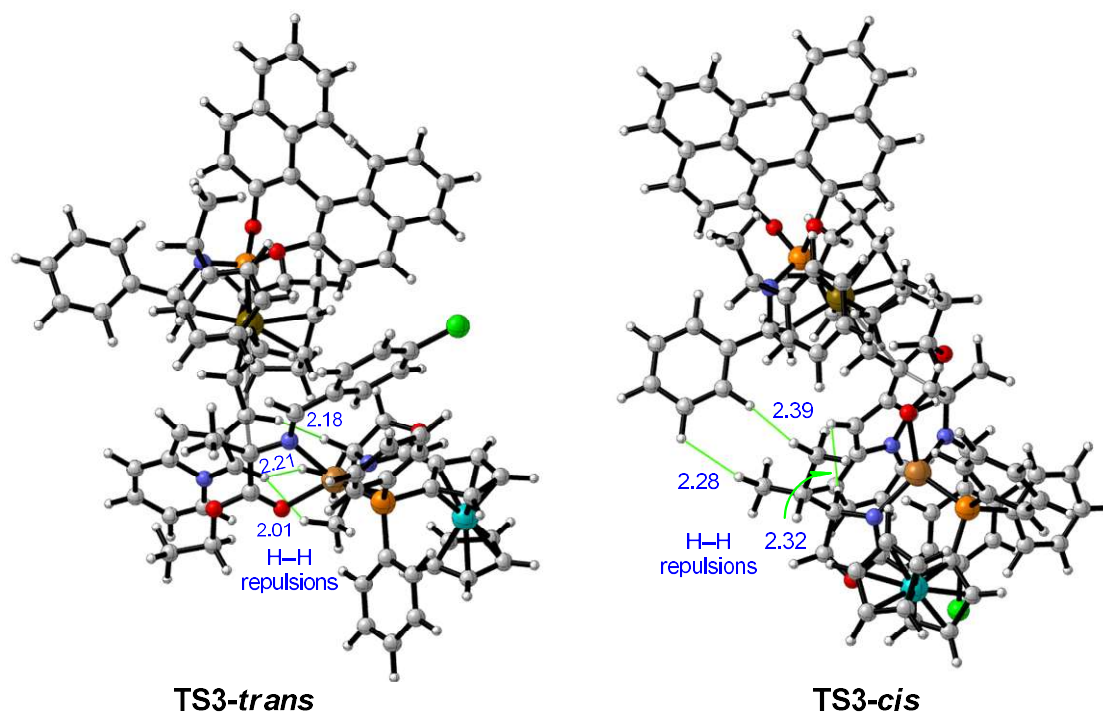

**Fig. S5.** Optimized structures of the *Re*-face-*Si*-face reaction pathways (TS3) enclosed strong steric hindrance between allyl moiety and oxazoline fragment, with selected bond distances given in Å.



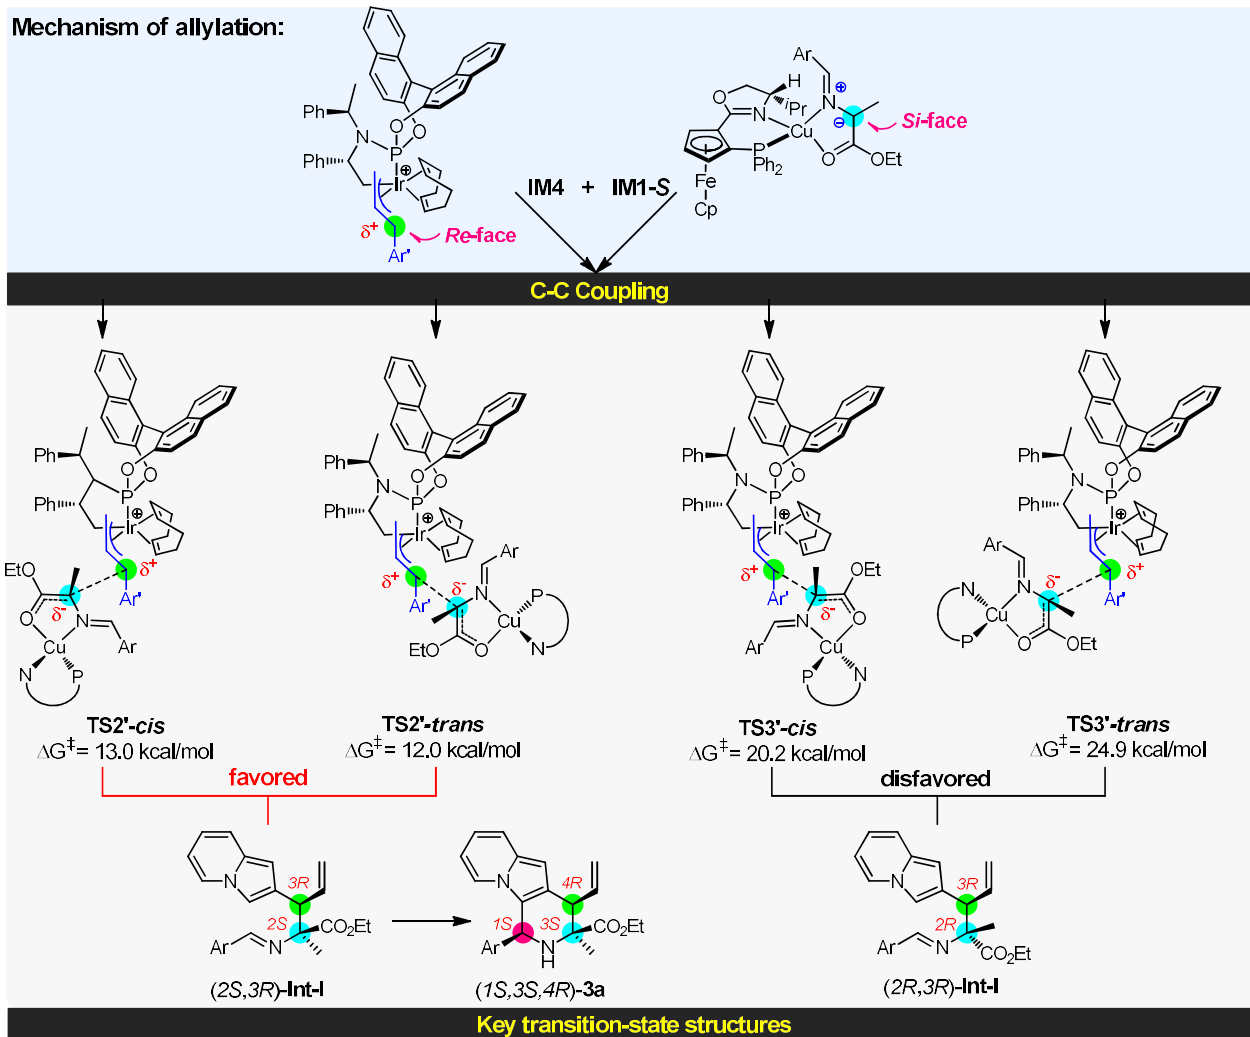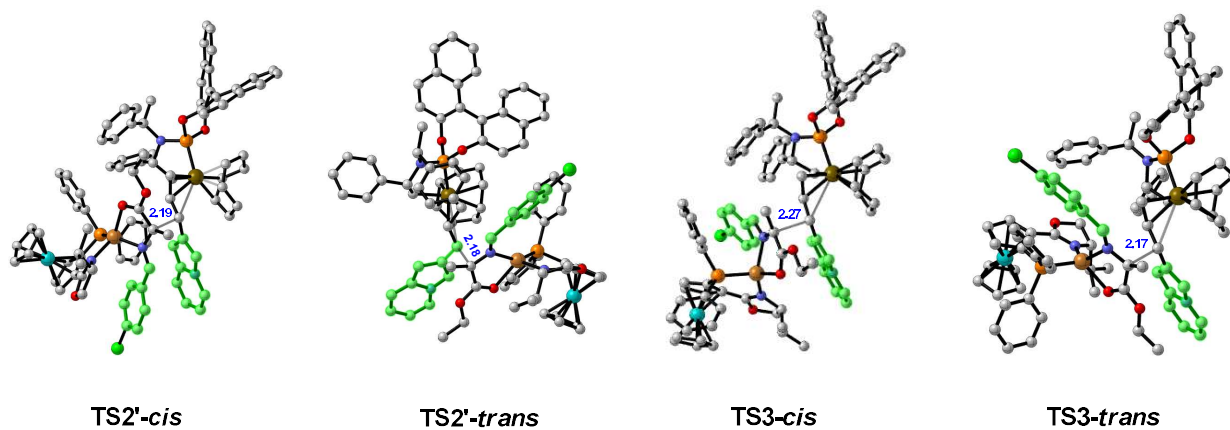

**Fig. S6.** Mechanism for the allylation of Cu<sup>I</sup>-azomethine ylide **IM1-S** by allyl-Ir<sup>III</sup> **IM4** [Cu(I)/(*S,S*<sub>p</sub>)-**L1**+ Ir(I)/(*R,R,R*<sub>a</sub>)-**L6**], and the optimized structures of bond-forming transition states. Free energies are given in kcal/mol (energy zero: **IM1-S** and **IM4**), and selected distances are shown in Å.

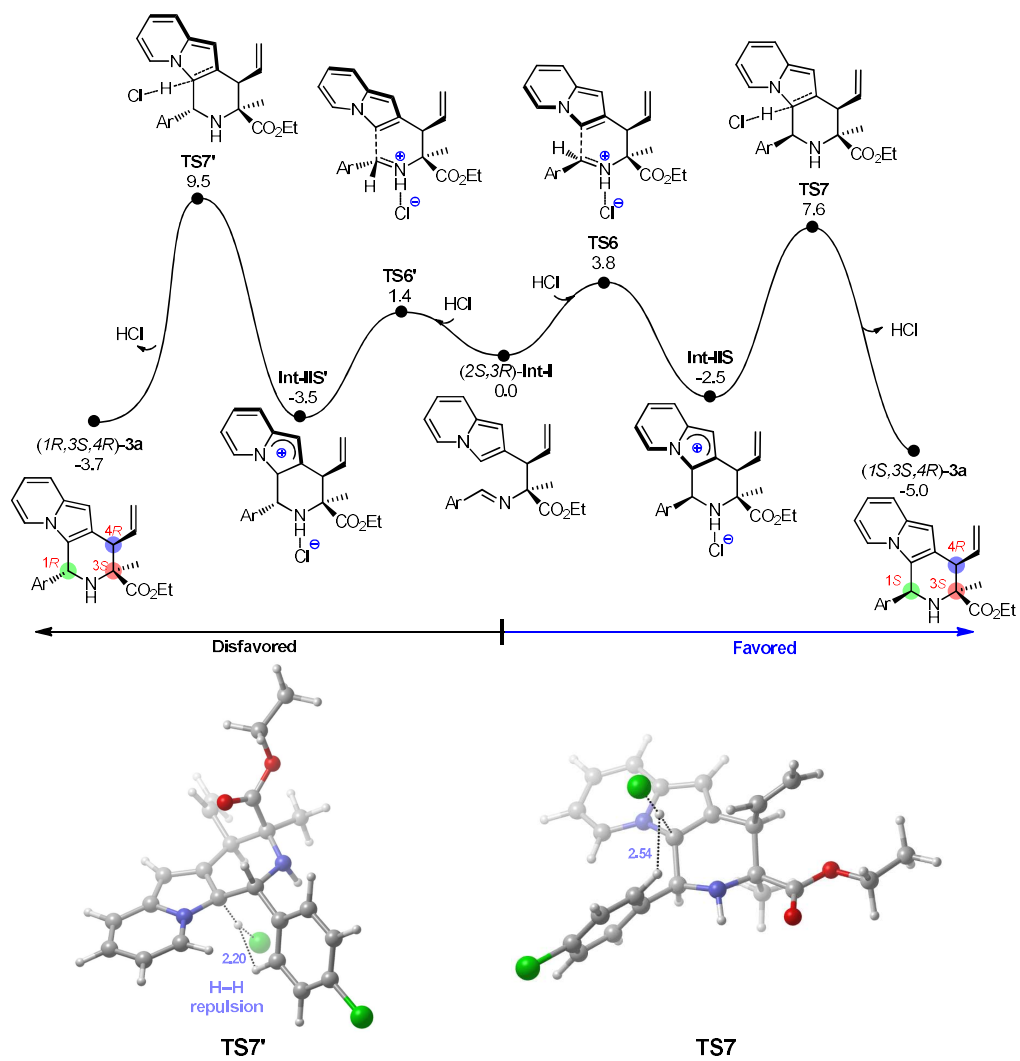

**Fig. S7.** Free energy profiles for Friedel-Crafts type reaction of (2S,3R)-Int-I.

## Energies and Cartesian Coordinates (Å) for the Optimized Structures

|                                               |           |           |           |    |           |           |           |
|-----------------------------------------------|-----------|-----------|-----------|----|-----------|-----------|-----------|
| <b>(R)-IM0</b>                                |           |           |           | C  | 3.103929  | -2.393986 | -2.204272 |
| M06-L SCF energy in solvent: -5590.968383 a.u |           |           |           | C  | 4.545650  | -0.018701 | -2.450817 |
| C                                             | 0.412413  | -1.700265 | 1.879946  | H  | 2.840279  | 0.932962  | -1.525473 |
| C                                             | 0.932121  | -2.539371 | 2.922944  | C  | 4.369026  | -2.404485 | -2.781522 |
| H                                             | 0.578122  | -2.551478 | 3.947642  | H  | 2.532747  | -3.319762 | -2.126922 |
| C                                             | 2.012377  | -3.291730 | 2.388729  | C  | 5.092442  | -1.218214 | -2.900393 |
| H                                             | 2.642188  | -3.976909 | 2.945627  | H  | 5.105555  | 0.908932  | -2.554738 |
| C                                             | 1.193127  | -1.949484 | 0.678118  | H  | 4.790367  | -3.339349 | -3.145354 |
| C                                             | 2.170174  | -2.943197 | 1.018355  | H  | 6.081307  | -1.228757 | -3.354449 |
| H                                             | 2.932592  | -3.322203 | 0.345326  | Cu | -0.158567 | 0.720849  | -0.507001 |
| C                                             | -2.012620 | 1.041056  | 2.064066  | O  | 1.244031  | 2.597983  | -0.633326 |
| C                                             | -2.516280 | -0.000980 | 3.069167  | C  | 0.667257  | 3.430367  | -1.321597 |
| H                                             | -2.653991 | 0.386452  | 4.083230  | O  | 1.024787  | 4.698112  | -1.425380 |
| N                                             | -0.899454 | 0.344169  | 1.388192  | C  | -0.515760 | 3.098257  | -2.206940 |
| C                                             | -0.649780 | -0.728034 | 2.074425  | N  | -1.281425 | 2.020583  | -1.582526 |
| O                                             | -1.455270 | -0.981936 | 3.122260  | C  | -2.564436 | 2.068421  | -1.726326 |
| H                                             | -3.428407 | -0.522532 | 2.756109  | H  | -3.020364 | 2.944067  | -2.214164 |
| H                                             | -2.781772 | 1.278814  | 1.314206  | C  | -3.477803 | 1.050916  | -1.243282 |
| C                                             | -1.574350 | 2.347101  | 2.744950  | C  | -4.803688 | 1.414741  | -0.957689 |
| C                                             | -0.740706 | 3.227634  | 1.829796  | C  | -3.074805 | -0.275612 | -1.014366 |
| C                                             | -2.806059 | 3.090085  | 3.246643  | C  | -5.686980 | 0.505761  | -0.394317 |
| H                                             | -0.952973 | 2.065179  | 3.613824  | H  | -5.137481 | 2.433034  | -1.155781 |
| H                                             | 0.205639  | 2.750548  | 1.555120  | C  | -3.951342 | -1.196680 | -0.464405 |
| H                                             | -0.513593 | 4.185686  | 2.313136  | H  | -2.071125 | -0.594592 | -1.295623 |
| H                                             | -1.284925 | 3.448772  | 0.898179  | C  | -5.249017 | -0.794047 | -0.138990 |
| H                                             | -3.429293 | 2.477366  | 3.909745  | H  | -6.706818 | 0.791872  | -0.153719 |
| H                                             | -3.436364 | 3.404677  | 2.402881  | H  | -3.639960 | -2.224759 | -0.294597 |
| H                                             | -2.526518 | 3.990759  | 3.803367  | C  | 2.191484  | 5.107329  | -0.650451 |
| P                                             | 0.926591  | -1.147333 | -0.918519 | H  | 3.044531  | 4.507335  | -0.986768 |
| C                                             | -0.089522 | -2.351912 | -1.842692 | H  | 1.998464  | 4.855844  | 0.398602  |
| C                                             | -0.274633 | -2.160626 | -3.220060 | C  | 3.021094  | 0.550165  | 1.619303  |
| C                                             | -0.802658 | -3.366299 | -1.193389 | C  | 2.451476  | 0.598151  | 2.925977  |
| C                                             | -1.150459 | -2.971758 | -3.931782 | H  | 1.585842  | 1.186191  | 3.216335  |
| H                                             | 0.277548  | -1.373720 | -3.736665 | C  | 3.165931  | -0.313002 | 3.757427  |
| C                                             | -1.684335 | -4.173668 | -1.910514 | H  | 2.949249  | -0.533267 | 4.797015  |
| H                                             | -0.665493 | -3.531782 | -0.124624 | C  | 4.088706  | -0.400518 | 1.640098  |
| C                                             | -1.862837 | -3.976091 | -3.276567 | H  | 4.691578  | -0.698809 | 0.787776  |
| H                                             | -1.279260 | -2.820686 | -5.001760 | C  | 4.179172  | -0.929161 | 2.963617  |
| H                                             | -2.227339 | -4.965725 | -1.397931 | H  | 4.867152  | -1.698627 | 3.296879  |
| H                                             | -2.550760 | -4.607976 | -3.834289 | H  | 2.672585  | 1.115360  | 0.759274  |
| C                                             | 2.553798  | -1.194049 | -1.734088 | Fe | 2.347041  | -1.285617 | 2.168141  |
| C                                             | 3.278088  | -0.004040 | -1.873839 | Cl | -6.334534 | -1.933091 | 0.582942  |

|   |           |          |           |
|---|-----------|----------|-----------|
| C | 2.385443  | 6.578587 | -0.875134 |
| H | 1.511335  | 7.148696 | -0.545944 |
| H | 3.252161  | 6.926888 | -0.305070 |
| H | 2.563550  | 6.799692 | -1.931977 |
| H | -1.133632 | 3.999343 | -2.335801 |
| C | 0.011351  | 2.641588 | -3.568541 |
| H | 0.602792  | 3.433141 | -4.040083 |
| H | 0.639452  | 1.749854 | -3.452772 |
| H | -0.825549 | 2.391397 | -4.228262 |

**(S)-IM0**

M06-L SCF energy in solvent: -5590.964102 a.u

|   |           |           |           |
|---|-----------|-----------|-----------|
| C | -0.282588 | -2.220428 | -1.313007 |
| C | -0.762086 | -3.350950 | -2.059115 |
| H | -0.347146 | -3.698915 | -2.998225 |
| C | -1.892430 | -3.882748 | -1.381967 |
| H | -2.505848 | -4.707895 | -1.727220 |
| C | -1.138688 | -2.065598 | -0.149499 |
| C | -2.122185 | -3.106048 | -0.212363 |
| H | -2.932253 | -3.238351 | 0.497946  |
| C | 2.365103  | 0.200937  | -2.102218 |
| C | 2.784709  | -1.101694 | -2.797449 |
| H | 2.928083  | -1.000494 | -3.878096 |
| N | 1.145508  | -0.184727 | -1.359470 |
| C | 0.843882  | -1.395199 | -1.719624 |
| O | 1.669658  | -1.996444 | -2.593907 |
| H | 3.670902  | -1.577559 | -2.361994 |
| H | 3.122012  | 0.520940  | -1.372164 |
| C | 2.150145  | 1.354680  | -3.090986 |
| C | 1.496656  | 2.559492  | -2.436949 |
| C | 3.492276  | 1.741039  | -3.702049 |
| H | 1.486185  | 0.983430  | -3.891215 |
| H | 0.500815  | 2.324262  | -2.047230 |
| H | 1.397209  | 3.384664  | -3.152325 |
| H | 2.111650  | 2.920733  | -1.598875 |
| H | 3.991844  | 0.902250  | -4.202176 |
| H | 4.174610  | 2.112339  | -2.923749 |
| H | 3.373996  | 2.537442  | -4.444520 |
| P | -0.930945 | -0.816996 | 1.134866  |
| C | 0.032067  | -1.684825 | 2.421854  |
| C | 0.157681  | -1.097008 | 3.689483  |
| C | 0.772937  | -2.836069 | 2.129402  |
| C | 1.002129  | -1.653613 | 4.643382  |
| H | -0.414972 | -0.199526 | 3.929635  |

|    |           |           |           |
|----|-----------|-----------|-----------|
| C  | 1.621380  | -3.388295 | 3.087598  |
| H  | 0.683210  | -3.308859 | 1.151696  |
| C  | 1.741461  | -2.797285 | 4.341997  |
| H  | 1.086039  | -1.193228 | 5.625849  |
| H  | 2.186334  | -4.288312 | 2.851267  |
| H  | 2.405926  | -3.228740 | 5.087497  |
| C  | -2.598350 | -0.631170 | 1.844955  |
| C  | -3.357921 | 0.489348  | 1.488675  |
| C  | -3.149952 | -1.586567 | 2.708488  |
| C  | -4.655502 | 0.643227  | 1.968996  |
| H  | -2.920929 | 1.236775  | 0.824920  |
| C  | -4.444882 | -1.427496 | 3.192021  |
| H  | -2.559154 | -2.452848 | 3.007552  |
| C  | -5.199838 | -0.315989 | 2.820184  |
| H  | -5.242192 | 1.515555  | 1.685216  |
| H  | -4.866263 | -2.172385 | 3.864017  |
| H  | -6.211578 | -0.194388 | 3.201665  |
| Cu | 0.227836  | 0.815505  | 0.211933  |
| O  | -1.210341 | 2.525584  | -0.428160 |
| C  | -1.050667 | 3.469631  | 0.333141  |
| O  | -1.919457 | 4.459491  | 0.469382  |
| C  | 0.136970  | 3.621666  | 1.274070  |
| N  | 1.059274  | 2.508093  | 1.027937  |
| C  | 2.320868  | 2.683533  | 1.227681  |
| H  | 2.719046  | 3.672361  | 1.487513  |
| C  | 3.295741  | 1.615944  | 1.070031  |
| C  | 4.580711  | 1.930723  | 0.603464  |
| C  | 2.976812  | 0.274713  | 1.334654  |
| C  | 5.503586  | 0.929948  | 0.332737  |
| H  | 4.848274  | 2.971068  | 0.418801  |
| C  | 3.895665  | -0.733987 | 1.085270  |
| H  | 2.009792  | 0.021892  | 1.769522  |
| C  | 5.147698  | -0.399560 | 0.566096  |
| H  | 6.491424  | 1.168582  | -0.051406 |
| H  | 3.649372  | -1.771524 | 1.298604  |
| C  | -3.115310 | 4.380689  | -0.360776 |
| H  | -3.621723 | 3.434182  | -0.133771 |
| H  | -2.793927 | 4.341007  | -1.407263 |
| C  | -2.847027 | 0.001200  | -2.006094 |
| C  | -2.197259 | -0.401211 | -3.210484 |
| H  | -1.302903 | 0.053348  | -3.627175 |
| C  | -2.881704 | -1.540566 | -3.726001 |
| H  | -2.606438 | -2.104725 | -4.610341 |
| C  | -3.933725 | -0.896640 | -1.771748 |

|    |           |           |           |
|----|-----------|-----------|-----------|
| H  | -4.594994 | -0.887480 | -0.910697 |
| C  | -3.955407 | -1.846900 | -2.836998 |
| H  | -4.639717 | -2.683014 | -2.931991 |
| H  | -2.536959 | 0.825619  | -1.370973 |
| Fe | -2.183709 | -1.914565 | -1.850392 |
| Cl | 6.288254  | -1.657951 | 0.224559  |
| C  | -3.958202 | 5.582854  | -0.048937 |
| H  | -3.423390 | 6.510850  | -0.273467 |
| H  | -4.868742 | 5.562528  | -0.655503 |
| H  | -4.251902 | 5.600080  | 1.005097  |
| H  | -0.284161 | 3.452167  | 2.280212  |
| C  | 0.722037  | 5.027136  | 1.228236  |
| H  | 1.228374  | 5.212002  | 0.273152  |
| H  | -0.076660 | 5.762935  | 1.340464  |
| H  | 1.436668  | 5.196289  | 2.038709  |

**(R)-IM0'**

M06-L SCF energy in solvent: -5590.960353 a.u

|   |           |           |           |
|---|-----------|-----------|-----------|
| C | -2.575070 | 0.055627  | 0.879575  |
| C | -4.011673 | 0.066647  | 0.908486  |
| H | -4.616695 | 0.026554  | 1.806898  |
| C | -4.480365 | 0.091270  | -0.431588 |
| H | -5.519810 | 0.065622  | -0.739505 |
| C | -2.153398 | 0.061152  | -0.513616 |
| C | -3.353464 | 0.085225  | -1.300429 |
| H | -3.387629 | 0.102610  | -2.385368 |
| C | -0.164644 | -0.604714 | 3.539157  |
| C | -1.457067 | -0.251968 | 4.271005  |
| H | -1.772630 | -0.982511 | 5.020320  |
| N | -0.468248 | -0.180983 | 2.157117  |
| C | -1.762532 | -0.115128 | 2.065617  |
| O | -2.450606 | -0.260568 | 3.217317  |
| H | -1.454749 | 0.751237  | 4.715532  |
| H | 0.696038  | -0.031193 | 3.913336  |
| C | 0.150437  | -2.109694 | 3.619853  |
| C | 1.168129  | -2.555122 | 2.582856  |
| C | 0.615230  | -2.473203 | 5.024020  |
| H | -0.799859 | -2.635107 | 3.419021  |
| H | 0.850060  | -2.301481 | 1.561819  |
| H | 1.322157  | -3.639497 | 2.630447  |
| H | 2.142810  | -2.081693 | 2.767439  |
| H | -0.103660 | -2.178024 | 5.798079  |
| H | 1.570412  | -1.983518 | 5.256588  |
| H | 0.769053  | -3.553220 | 5.119997  |

|    |           |           |           |
|----|-----------|-----------|-----------|
| P  | -0.449505 | 0.241298  | -1.129395 |
| C  | -0.629025 | 1.579175  | -2.361168 |
| C  | 0.178652  | 1.600856  | -3.505666 |
| C  | -1.522227 | 2.635697  | -2.137440 |
| C  | 0.080059  | 2.648345  | -4.417058 |
| H  | 0.876398  | 0.784843  | -3.693727 |
| C  | -1.621071 | 3.677073  | -3.055399 |
| H  | -2.143050 | 2.638320  | -1.242372 |
| C  | -0.822672 | 3.685780  | -4.197431 |
| H  | 0.704827  | 2.647019  | -5.307877 |
| H  | -2.335191 | 4.481435  | -2.882876 |
| H  | -0.907983 | 4.496876  | -4.917664 |
| C  | -0.090582 | -1.229912 | -2.143236 |
| C  | 0.985553  | -2.041533 | -1.774174 |
| C  | -0.856136 | -1.581220 | -3.262794 |
| C  | 1.292464  | -3.190813 | -2.498855 |
| H  | 1.587448  | -1.759826 | -0.910675 |
| C  | -0.556234 | -2.733054 | -3.982148 |
| H  | -1.681989 | -0.944311 | -3.580191 |
| C  | 0.516566  | -3.539974 | -3.600625 |
| H  | 2.141704  | -3.807328 | -2.207857 |
| H  | -1.155462 | -3.000173 | -4.850565 |
| H  | 0.751625  | -4.436054 | -4.171116 |
| Cu | 0.717502  | 0.656829  | 0.730664  |
| C  | -2.242230 | -3.249587 | -0.455765 |
| C  | -2.702106 | -3.220543 | 0.891805  |
| H  | -2.074224 | -3.225837 | 1.778215  |
| C  | -4.124500 | -3.124136 | 0.876304  |
| H  | -4.768983 | -3.045736 | 1.745109  |
| C  | -3.381329 | -3.170203 | -1.310980 |
| H  | -3.361958 | -3.139332 | -2.395063 |
| C  | -4.545349 | -3.097502 | -0.487677 |
| H  | -5.567234 | -2.993809 | -0.836475 |
| H  | -1.207006 | -3.290598 | -0.777114 |
| Fe | -3.308033 | -1.542242 | -0.097325 |
| O  | -0.404130 | 2.855793  | 0.844464  |
| C  | 0.520618  | 3.630114  | 1.029428  |
| O  | 0.472076  | 4.937781  | 0.819214  |
| C  | 1.857700  | 3.211803  | 1.611986  |
| N  | 2.247371  | 1.902829  | 1.078877  |
| C  | 3.497544  | 1.772974  | 0.767878  |
| C  | 4.111202  | 0.536462  | 0.335406  |
| C  | 5.366835  | 0.564878  | -0.292873 |
| C  | 3.494094  | -0.705168 | 0.546996  |

|                                               |           |           |           |    |           |           |           |
|-----------------------------------------------|-----------|-----------|-----------|----|-----------|-----------|-----------|
| C                                             | 5.966882  | -0.602456 | -0.739698 | H  | 0.871911  | -2.273866 | 1.580281  |
| H                                             | 5.869596  | 1.519106  | -0.447205 | H  | 1.359800  | -3.597004 | 2.660473  |
| C                                             | 4.090176  | -1.881852 | 0.125093  | H  | 2.167059  | -2.030543 | 2.778563  |
| H                                             | 2.542553  | -0.743004 | 1.080390  | H  | -0.068872 | -2.115932 | 5.818146  |
| C                                             | 5.319511  | -1.821885 | -0.533055 | H  | 1.601886  | -1.913277 | 5.269528  |
| H                                             | 6.929735  | -0.578284 | -1.242400 | H  | 0.812954  | -3.490737 | 5.151262  |
| H                                             | 3.617517  | -2.845412 | 0.304854  | P  | -0.452345 | 0.224214  | -1.134002 |
| C                                             | -0.797268 | 5.455598  | 0.325452  | C  | -0.645448 | 1.550197  | -2.376877 |
| H                                             | -1.562437 | 5.242877  | 1.080996  | C  | 0.160279  | 1.568995  | -3.522842 |
| H                                             | -1.052334 | 4.894224  | -0.580966 | C  | -1.548662 | 2.599997  | -2.161852 |
| Cl                                            | 6.052231  | -3.285475 | -1.093570 | C  | 0.049444  | 2.606163  | -4.444619 |
| H                                             | 4.157223  | 2.651240  | 0.824423  | H  | 0.865896  | 0.758133  | -3.703883 |
| C                                             | -0.616540 | 6.924495  | 0.073384  | C  | -1.660428 | 3.630448  | -3.090634 |
| H                                             | -1.553623 | 7.354217  | -0.294534 | H  | -2.167158 | 2.606577  | -1.265256 |
| H                                             | 0.157759  | 7.103817  | -0.678966 | C  | -0.864347 | 3.635842  | -4.234301 |
| H                                             | -0.337417 | 7.455465  | 0.988848  | H  | 0.672919  | 2.602426  | -5.336339 |
| H                                             | 2.611511  | 3.971133  | 1.359030  | H  | -2.383003 | 4.428656  | -2.925152 |
| C                                             | 1.707414  | 3.127096  | 3.130506  | H  | -0.959935 | 4.438191  | -4.962951 |
| H                                             | 0.937436  | 2.390881  | 3.391969  | C  | -0.090590 | -1.252935 | -2.138494 |
| H                                             | 1.416233  | 4.098506  | 3.543946  | C  | 0.990408  | -2.058571 | -1.770308 |
| H                                             | 2.653716  | 2.823225  | 3.589388  | C  | -0.859575 | -1.612615 | -3.252995 |
| <b>(S)-IM0'</b>                               |           |           |           | C  | 1.298395  | -3.210061 | -2.491142 |
| M06-L SCF energy in solvent: -5590.960336 a.u |           |           |           | H  | 1.595615  | -1.770735 | -0.911064 |
| C                                             | -2.571764 | 0.047372  | 0.882948  | C  | -0.558568 | -2.766553 | -3.968420 |
| C                                             | -4.008445 | 0.047972  | 0.914994  | H  | -1.688669 | -0.979839 | -3.570096 |
| H                                             | -4.611199 | 0.013353  | 1.815153  | C  | 0.519044  | -3.567420 | -3.587896 |
| C                                             | -4.480151 | 0.053952  | -0.424209 | H  | 2.151446  | -3.821761 | -2.201144 |
| H                                             | -5.520019 | 0.017351  | -0.729687 | H  | -1.160454 | -3.039790 | -4.833089 |
| C                                             | -2.153350 | 0.039776  | -0.511022 | H  | 0.755329  | -4.465168 | -4.155283 |
| C                                             | -3.355088 | 0.046682  | -1.295405 | Cu | 0.715667  | 0.668377  | 0.717053  |
| H                                             | -3.391700 | 0.051675  | -2.380369 | C  | -2.217019 | -3.270592 | -0.414396 |
| C                                             | -0.150297 | -0.566385 | 3.543543  | C  | -2.675912 | -3.229803 | 0.933286  |
| C                                             | -1.443956 | -0.217044 | 4.274847  | H  | -2.047450 | -3.221860 | 1.819241  |
| H                                             | -1.751751 | -0.942568 | 5.032216  | C  | -4.099025 | -3.144432 | 0.918319  |
| N                                             | -0.460608 | -0.159456 | 2.157995  | H  | -4.743217 | -3.061332 | 1.786921  |
| C                                             | -1.755519 | -0.105039 | 2.068902  | C  | -3.357460 | -3.208325 | -1.269174 |
| O                                             | -2.439820 | -0.244213 | 3.223666  | H  | -3.338988 | -3.188711 | -2.353578 |
| H                                             | -1.448793 | 0.790504  | 4.709455  | C  | -4.521281 | -3.135455 | -0.445504 |
| H                                             | 0.706431  | 0.018211  | 3.909752  | H  | -5.544228 | -3.043024 | -0.794314 |
| C                                             | 0.177850  | -2.067672 | 3.638523  | H  | -1.181774 | -3.308144 | -0.736213 |
| C                                             | 1.195970  | -2.514572 | 2.602619  | Fe | -3.295149 | -1.567128 | -0.073904 |
| C                                             | 0.650009  | -2.413024 | 5.044796  | O  | -0.417601 | 2.860280  | 0.805470  |
| H                                             | -0.768535 | -2.603231 | 3.445870  | C  | 0.500301  | 3.643045  | 0.989067  |
|                                               |           |           |           | O  | 0.439384  | 4.949381  | 0.774501  |

|                                               |           |           |           |    |           |           |           |
|-----------------------------------------------|-----------|-----------|-----------|----|-----------|-----------|-----------|
| C                                             | 1.840301  | 3.238274  | 1.574718  | H  | -3.468937 | -0.183416 | 2.714199  |
| N                                             | 2.238061  | 1.927646  | 1.052391  | H  | -2.609272 | 1.583865  | 1.354171  |
| C                                             | 3.489293  | 1.802561  | 0.743454  | C  | -1.307349 | 2.471962  | 2.827235  |
| C                                             | 4.110811  | 0.566317  | 0.321466  | C  | -0.450237 | 3.328229  | 1.908992  |
| C                                             | 5.369914  | 0.596603  | -0.299735 | C  | -2.443863 | 3.300103  | 3.415048  |
| C                                             | 3.498049  | -0.676876 | 0.536747  | H  | -0.678510 | 2.094428  | 3.654923  |
| C                                             | 5.978640  | -0.570785 | -0.734624 | H  | 0.382716  | 2.767015  | 1.469508  |
| H                                             | 5.869184  | 1.552160  | -0.457121 | H  | -0.037674 | 4.186332  | 2.454206  |
| C                                             | 4.102241  | -1.853317 | 0.126098  | H  | -1.049993 | 3.719446  | 1.076378  |
| H                                             | 2.543663  | -0.716038 | 1.064940  | H  | -3.076395 | 2.730922  | 4.108276  |
| C                                             | 5.335823  | -1.791931 | -0.524002 | H  | -3.092289 | 3.678913  | 2.612266  |
| H                                             | 6.944880  | -0.545239 | -1.230740 | H  | -2.056392 | 4.167323  | 3.961862  |
| H                                             | 3.632990  | -2.817965 | 0.308950  | P  | 0.713868  | -1.167835 | -0.949551 |
| C                                             | -0.834125 | 5.450200  | 0.273557  | C  | -0.385049 | -2.346675 | -1.818543 |
| H                                             | -1.611789 | 5.170506  | 0.993512  | C  | -0.714801 | -2.071474 | -3.154263 |
| H                                             | -1.043926 | 4.928221  | -0.667793 | C  | -1.005376 | -3.425453 | -1.177342 |
| Cl                                            | 6.079621  | -3.256300 | -1.067538 | C  | -1.634547 | -2.860490 | -3.832685 |
| H                                             | 4.143879  | 2.685010  | 0.793958  | H  | -0.252437 | -1.220682 | -3.657343 |
| C                                             | -0.697906 | 6.935524  | 0.103271  | C  | -1.933600 | -4.211096 | -1.859132 |
| H                                             | -1.637687 | 7.352552  | -0.272079 | H  | -0.764889 | -3.653442 | -0.139322 |
| H                                             | 0.092403  | 7.180889  | -0.612924 | C  | -2.251731 | -3.930360 | -3.184437 |
| H                                             | -0.466014 | 7.425916  | 1.053906  | H  | -1.881742 | -2.632999 | -4.868038 |
| H                                             | 2.588985  | 4.000371  | 1.315169  | H  | -2.412485 | -5.044377 | -1.347219 |
| C                                             | 1.690907  | 3.164801  | 3.093902  | H  | -2.983708 | -4.539470 | -3.711652 |
| H                                             | 0.926256  | 2.425051  | 3.361010  | C  | 2.323184  | -1.380779 | -1.792671 |
| H                                             | 1.392965  | 4.137378  | 3.499606  | C  | 3.171043  | -0.271223 | -1.892824 |
| H                                             | 2.639409  | 2.871120  | 3.554862  | C  | 2.742186  | -2.615038 | -2.306821 |
|                                               |           |           |           | C  | 4.431809  | -0.405524 | -2.470465 |
|                                               |           |           |           | H  | 2.826842  | 0.697603  | -1.526545 |
|                                               |           |           |           | C  | 4.001268  | -2.742936 | -2.885809 |
|                                               |           |           |           | H  | 2.073129  | -3.475503 | -2.258508 |
|                                               |           |           |           | C  | 4.850599  | -1.639901 | -2.960945 |
|                                               |           |           |           | H  | 5.086214  | 0.462035  | -2.544590 |
|                                               |           |           |           | H  | 4.320291  | -3.705516 | -3.282510 |
|                                               |           |           |           | H  | 5.834903  | -1.742297 | -3.414957 |
|                                               |           |           |           | Cu | -0.041867 | 0.835459  | -0.473982 |
|                                               |           |           |           | O  | 1.509959  | 2.275547  | -0.722323 |
|                                               |           |           |           | C  | 1.010011  | 3.289085  | -1.286041 |
|                                               |           |           |           | O  | 1.818304  | 4.333050  | -1.622363 |
|                                               |           |           |           | C  | -0.354290 | 3.458127  | -1.598703 |
|                                               |           |           |           | N  | -1.158491 | 2.401857  | -1.288906 |
|                                               |           |           |           | C  | -2.471339 | 2.502410  | -1.365962 |
|                                               |           |           |           | H  | -2.924937 | 3.466744  | -1.620678 |
|                                               |           |           |           | C  | -3.391545 | 1.432607  | -1.069578 |
| <b>IM1</b>                                    |           |           |           |    |           |           |           |
| M06-L SCF energy in solvent: -5590.488844 a.u |           |           |           |    |           |           |           |
| C                                             | 0.256000  | -1.710242 | 1.860881  |    |           |           |           |
| C                                             | 0.731444  | -2.599346 | 2.880964  |    |           |           |           |
| H                                             | 0.400327  | -2.596275 | 3.913559  |    |           |           |           |
| C                                             | 1.746195  | -3.419880 | 2.314403  |    |           |           |           |
| H                                             | 2.335663  | -4.158039 | 2.848422  |    |           |           |           |
| C                                             | 0.987972  | -1.996227 | 0.640133  |    |           |           |           |
| C                                             | 1.899256  | -3.060892 | 0.944949  |    |           |           |           |
| H                                             | 2.618949  | -3.478937 | 0.248267  |    |           |           |           |
| C                                             | -1.885123 | 1.243063  | 2.107699  |    |           |           |           |
| C                                             | -2.515495 | 0.226142  | 3.069163  |    |           |           |           |
| H                                             | -2.637262 | 0.592170  | 4.093868  |    |           |           |           |
| N                                             | -0.837882 | 0.456893  | 1.432874  |    |           |           |           |
| C                                             | -0.717627 | -0.652270 | 2.082293  |    |           |           |           |
| O                                             | -1.564160 | -0.864590 | 3.113376  |    |           |           |           |

|    |           |           |           |
|----|-----------|-----------|-----------|
| C  | -4.734233 | 1.745209  | -0.771581 |
| C  | -3.027452 | 0.071167  | -1.038175 |
| C  | -5.647953 | 0.768335  | -0.403643 |
| H  | -5.053740 | 2.787342  | -0.806853 |
| C  | -3.928514 | -0.917393 | -0.673767 |
| H  | -2.014340 | -0.211126 | -1.319752 |
| C  | -5.235965 | -0.561489 | -0.343634 |
| H  | -6.674419 | 1.029953  | -0.158838 |
| H  | -3.624627 | -1.962570 | -0.664989 |
| C  | 3.200959  | 4.172246  | -1.303705 |
| H  | 3.592262  | 3.279641  | -1.813374 |
| H  | 3.310964  | 3.995600  | -0.224817 |
| C  | 2.998739  | 0.362186  | 1.592440  |
| C  | 2.448891  | 0.414179  | 2.907257  |
| H  | 1.618419  | 1.042860  | 3.215593  |
| C  | 3.115102  | -0.557611 | 3.711215  |
| H  | 2.893616  | -0.789350 | 4.747728  |
| C  | 4.008024  | -0.650196 | 1.581964  |
| H  | 4.583222  | -0.962959 | 0.715725  |
| C  | 4.082133  | -1.215543 | 2.891929  |
| H  | 4.724694  | -2.034363 | 3.198754  |
| H  | 2.668358  | 0.964475  | 0.748697  |
| C  | -0.907556 | 4.728698  | -2.143999 |
| H  | -1.526974 | 4.549499  | -3.036671 |
| H  | -0.107589 | 5.420358  | -2.415911 |
| H  | -1.561559 | 5.243863  | -1.418983 |
| Fe | 2.222752  | -1.445211 | 2.120666  |
| Cl | -6.372062 | -1.799002 | 0.143295  |
| C  | 3.911231  | 5.424145  | -1.746316 |
| H  | 3.510037  | 6.304439  | -1.232635 |
| H  | 4.981492  | 5.355605  | -1.523092 |
| H  | 3.795096  | 5.580179  | -2.824164 |

### IM1'

M06-L SCF energy in solvent: -5590.482432 a.u

|   |           |           |           |
|---|-----------|-----------|-----------|
| C | -0.099175 | -2.715460 | -0.647394 |
| C | -0.609536 | -4.035536 | -0.889788 |
| H | -0.333434 | -4.661602 | -1.730081 |
| C | -1.573993 | -4.329603 | 0.108393  |
| H | -2.170721 | -5.233658 | 0.168735  |
| C | -0.765520 | -2.183707 | 0.533455  |
| C | -1.662091 | -3.211353 | 0.983226  |
| H | -2.305577 | -3.143004 | 1.854647  |
| C | 2.199809  | -0.743839 | -2.712636 |

|    |           |           |           |
|----|-----------|-----------|-----------|
| C  | 2.207484  | -2.151092 | -3.323037 |
| H  | 1.717278  | -2.181040 | -4.307740 |
| N  | 1.163118  | -0.831444 | -1.666286 |
| C  | 0.836838  | -2.076255 | -1.560697 |
| O  | 1.418848  | -2.948332 | -2.421750 |
| H  | 3.194802  | -2.613972 | -3.405168 |
| H  | 3.148371  | -0.521902 | -2.195232 |
| C  | 1.952790  | 0.341954  | -3.761267 |
| C  | 1.875884  | 1.730841  | -3.152509 |
| C  | 3.052118  | 0.280455  | -4.817705 |
| H  | 0.987700  | 0.109935  | -4.246867 |
| H  | 1.036882  | 1.829396  | -2.457801 |
| H  | 1.756576  | 2.491670  | -3.933527 |
| H  | 2.789977  | 1.965864  | -2.588406 |
| H  | 3.105706  | -0.694066 | -5.320675 |
| H  | 4.034524  | 0.474257  | -4.364996 |
| H  | 2.893763  | 1.039083  | -5.592303 |
| P  | -0.266613 | -0.628883 | 1.346597  |
| C  | 0.434939  | -1.258832 | 2.919561  |
| C  | -0.354446 | -1.563136 | 4.034185  |
| C  | 1.820652  | -1.451305 | 2.982901  |
| C  | 0.232480  | -2.062246 | 5.192789  |
| H  | -1.431406 | -1.393030 | 3.998272  |
| C  | 2.401792  | -1.957823 | 4.142289  |
| H  | 2.437894  | -1.181994 | 2.122786  |
| C  | 1.610340  | -2.263963 | 5.246796  |
| H  | -0.386965 | -2.291866 | 6.058375  |
| H  | 3.480490  | -2.101818 | 4.186429  |
| H  | 2.067483  | -2.651625 | 6.155916  |
| C  | -1.776537 | 0.250536  | 1.883734  |
| C  | -1.590081 | 1.578673  | 2.295301  |
| C  | -3.073746 | -0.272171 | 1.873889  |
| C  | -2.672574 | 2.363140  | 2.675787  |
| H  | -0.586321 | 2.007702  | 2.277949  |
| C  | -4.160517 | 0.521745  | 2.235744  |
| H  | -3.248472 | -1.292462 | 1.538743  |
| C  | -3.963480 | 1.839713  | 2.635820  |
| H  | -2.508588 | 3.397825  | 2.971620  |
| H  | -5.166585 | 0.105492  | 2.198358  |
| H  | -4.815165 | 2.462611  | 2.903149  |
| Cu | 1.155757  | 0.402737  | 0.070632  |
| O  | 3.257739  | 0.026101  | 0.282027  |
| C  | 3.820938  | 1.151233  | 0.353417  |
| O  | 5.172706  | 1.215546  | 0.531354  |



|    |           |           |           |
|----|-----------|-----------|-----------|
| C  | 3.173395  | 2.402898  | 0.258895  |
| N  | 1.825715  | 2.349699  | 0.057695  |
| C  | 1.099417  | 3.449316  | 0.019588  |
| H  | 1.575057  | 4.412203  | 0.233673  |
| C  | -0.313883 | 3.508122  | -0.253848 |
| C  | -1.005063 | 4.693473  | 0.078764  |
| C  | -1.068403 | 2.477375  | -0.856717 |
| C  | -2.368687 | 4.835312  | -0.122415 |
| H  | -0.446599 | 5.514723  | 0.529177  |
| C  | -2.430594 | 2.615594  | -1.082483 |
| H  | -0.574299 | 1.550872  | -1.157231 |
| C  | -3.080530 | 3.785212  | -0.697947 |
| H  | -2.883099 | 5.750495  | 0.161581  |
| H  | -2.994647 | 1.828560  | -1.577752 |
| C  | 5.836937  | -0.042169 | 0.652430  |
| H  | 5.649545  | -0.644789 | -0.247087 |
| H  | 5.411842  | -0.599445 | 1.499177  |
| C  | -3.213975 | -0.993978 | -1.305793 |
| C  | -2.352045 | -1.278101 | -2.403948 |
| H  | -1.555834 | -0.632393 | -2.766522 |
| C  | -2.648816 | -2.596054 | -2.868732 |
| H  | -2.131503 | -3.122393 | -3.664555 |
| C  | -4.040894 | -2.134310 | -1.083203 |
| H  | -4.780161 | -2.240862 | -0.295494 |
| C  | -3.694339 | -3.125397 | -2.050862 |
| H  | -4.120234 | -4.120461 | -2.125777 |
| H  | -3.197715 | -0.094256 | -0.701040 |
| C  | 3.897507  | 3.700855  | 0.355610  |
| H  | 4.974676  | 3.542599  | 0.436030  |
| H  | 3.581251  | 4.295583  | 1.228218  |
| H  | 3.707560  | 4.332650  | -0.527739 |
| Cl | -4.803291 | 3.938194  | -0.950642 |
| Fe | -2.075657 | -2.643657 | -0.932609 |
| C  | 7.303553  | 0.241486  | 0.843822  |
| H  | 7.710082  | 0.795420  | -0.009347 |
| H  | 7.864368  | -0.694389 | 0.943099  |
| H  | 7.472900  | 0.839809  | 1.745466  |

### Cs<sub>2</sub>CO<sub>3</sub>

M06-L SCF energy in solvent: -304.357982 a.u

|   |           |           |           |
|---|-----------|-----------|-----------|
| O | -1.123135 | 1.806300  | 0.001059  |
| C | 0.000138  | 1.180650  | -0.000025 |
| O | 1.122975  | 1.806938  | -0.001051 |
| O | 0.000400  | -0.155272 | 0.000075  |

|    |           |           |           |
|----|-----------|-----------|-----------|
| Cs | -2.816330 | -0.315872 | -0.000066 |
| Cs | 2.816280  | -0.315903 | 0.000057  |

### Cs<sub>2</sub>CO<sub>3</sub>·H<sup>+</sup>

M06-L SCF energy in solvent: -304.867520 a.u

|    |           |           |           |
|----|-----------|-----------|-----------|
| H  | 0.849582  | 2.828372  | 0.000434  |
| O  | -1.134946 | 1.868732  | -0.000494 |
| C  | -0.100968 | 1.181358  | -0.000101 |
| O  | 1.117094  | 1.896259  | 0.000478  |
| O  | 0.048496  | -0.067539 | -0.000128 |
| Cs | -3.007555 | -0.353559 | 0.000040  |
| Cs | 2.998665  | -0.364552 | -0.000016 |

### 2a

M06-L SCF energy in solvent: -783.823347 a.u

|   |           |           |           |
|---|-----------|-----------|-----------|
| C | 2.474146  | -0.566993 | 0.658540  |
| H | 2.839600  | -0.505664 | 1.693118  |
| H | 2.570059  | -1.614273 | 0.343354  |
| C | 1.087236  | -0.071274 | 0.517525  |
| H | 0.922761  | 0.982074  | 0.751418  |
| C | 0.057771  | -0.860762 | 0.174485  |
| H | 0.270573  | -1.907098 | -0.062917 |
| O | 3.342484  | 0.254006  | -0.160188 |
| C | 4.643351  | 0.000681  | 0.024063  |
| O | 5.118727  | -0.817635 | 0.779541  |
| O | 5.332436  | 0.821285  | -0.784062 |
| C | 6.747540  | 0.664066  | -0.681985 |
| H | 7.045646  | -0.356838 | -0.940620 |
| H | 7.090463  | 0.884381  | 0.333992  |
| C | -1.332122 | -0.466930 | 0.099993  |
| C | -1.904797 | 0.795330  | 0.386162  |
| C | -2.365559 | -1.321327 | -0.277957 |
| C | -3.272854 | 0.701556  | 0.181336  |
| H | -1.383542 | 1.687412  | 0.711651  |
| H | -2.348370 | -2.363045 | -0.572596 |
| C | -4.368084 | 1.584673  | 0.294089  |
| C | -4.816897 | -1.048813 | -0.515652 |
| C | -5.639484 | 1.159034  | 0.010829  |
| H | -4.171103 | 2.606511  | 0.610262  |
| C | -5.862321 | -0.183034 | -0.400580 |
| H | -4.911308 | -2.085624 | -0.824739 |
| H | -6.480093 | 1.842581  | 0.099092  |
| H | -6.863447 | -0.536916 | -0.628747 |
| N | -3.541179 | -0.627027 | -0.232851 |

|                                               |           |           |           |   |           |           |           |
|-----------------------------------------------|-----------|-----------|-----------|---|-----------|-----------|-----------|
| H                                             | 7.170284  | 1.377189  | -1.390734 | C | -2.618993 | 1.166971  | -0.349742 |
|                                               |           |           |           | H | -3.258987 | 1.113520  | 0.546683  |
| <b>IM2</b>                                    |           |           |           | C | -3.027847 | 2.381321  | -1.152642 |
| M06-L SCF energy in solvent: -2352.941809 a.u |           |           |           | C | -2.286455 | 2.751181  | -2.279997 |
| Ir                                            | -1.605152 | -1.769286 | -0.549346 | H | -1.409335 | 2.158288  | -2.545703 |
| O                                             | 0.776678  | 0.121107  | 1.199450  | C | -2.655125 | 3.850070  | -3.044866 |
| O                                             | 0.806297  | 0.231254  | -1.356686 | H | -2.067060 | 4.126794  | -3.918993 |
| C                                             | 1.931083  | -0.643670 | 1.176102  | C | -3.780681 | 4.597455  | -2.695599 |
| C                                             | 2.016344  | -1.718472 | 2.082163  | H | -4.072532 | 5.458563  | -3.294306 |
| H                                             | 1.189602  | -1.880349 | 2.770230  | C | -4.526554 | 4.237514  | -1.577522 |
| C                                             | 3.130789  | -2.518062 | 2.089141  | H | -5.404605 | 4.817666  | -1.297506 |
| H                                             | 3.207694  | -3.349586 | 2.788832  | C | -4.147600 | 3.137965  | -0.807736 |
| C                                             | 4.185780  | -2.292625 | 1.173059  | H | -4.721749 | 2.863582  | 0.078722  |
| C                                             | 5.308692  | -3.152380 | 1.112929  | C | -1.028498 | 2.550816  | 0.950295  |
| H                                             | 5.352290  | -3.996015 | 1.801785  | H | -1.446122 | 3.359280  | 0.330139  |
| C                                             | 6.313863  | -2.942685 | 0.199547  | C | -1.866195 | 2.486298  | 2.214185  |
| H                                             | 7.168382  | -3.615603 | 0.160046  | C | -2.635580 | 3.589590  | 2.587084  |
| C                                             | 6.229366  | -1.858904 | -0.698168 | H | -2.649914 | 4.468961  | 1.940524  |
| H                                             | 7.013955  | -1.707390 | -1.437255 | C | -3.388724 | 3.571329  | 3.758259  |
| C                                             | 5.160065  | -0.994926 | -0.654539 | H | -3.987076 | 4.438729  | 4.032518  |
| H                                             | 5.102269  | -0.168472 | -1.359533 | C | -3.384677 | 2.439812  | 4.569015  |
| C                                             | 4.112987  | -1.172129 | 0.284097  | H | -3.977409 | 2.418550  | 5.481961  |
| C                                             | 2.980266  | -0.296524 | 0.339966  | C | -2.624391 | 1.330645  | 4.201304  |
| C                                             | 2.902855  | 0.945500  | -0.456198 | H | -2.621760 | 0.440610  | 4.828903  |
| C                                             | 3.896953  | 1.972177  | -0.351590 | C | -1.870346 | 1.352980  | 3.032222  |
| C                                             | 4.967390  | 1.907009  | 0.575649  | H | -1.286627 | 0.480024  | 2.737708  |
| H                                             | 5.041531  | 1.047389  | 1.237180  | C | 0.401885  | 2.964060  | 1.267729  |
| C                                             | 5.897457  | 2.916299  | 0.662237  | H | 1.014991  | 3.021314  | 0.363338  |
| H                                             | 6.703557  | 2.842593  | 1.390037  | H | 0.888522  | 2.298198  | 1.983214  |
| C                                             | 5.812148  | 4.047174  | -0.174605 | H | 0.365740  | 3.966151  | 1.710916  |
| H                                             | 6.556928  | 4.837134  | -0.099178 | C | -3.408259 | -2.929980 | -0.072353 |
| C                                             | 4.776596  | 4.153354  | -1.071211 | H | -4.209087 | -2.196646 | 0.040641  |
| H                                             | 4.685754  | 5.030107  | -1.712519 | C | -3.008947 | -3.254301 | -1.378615 |
| C                                             | 3.793334  | 3.139931  | -1.176433 | H | -3.510472 | -2.716840 | -2.187082 |
| C                                             | 2.696498  | 3.264823  | -2.062614 | C | -2.313214 | -4.539639 | -1.773236 |
| H                                             | 2.630778  | 4.149043  | -2.695858 | H | -2.656240 | -4.838102 | -2.771853 |
| C                                             | 1.714752  | 2.308233  | -2.104424 | H | -2.623841 | -5.351795 | -1.103715 |
| H                                             | 0.851531  | 2.402823  | -2.758984 | C | -0.781126 | -4.406597 | -1.790916 |
| C                                             | 1.813197  | 1.166423  | -1.282807 | H | -0.315157 | -5.403554 | -1.711452 |
| P                                             | -0.272830 | -0.030704 | -0.090673 | H | -0.471634 | -4.009964 | -2.767493 |
| N                                             | -1.214093 | 1.327121  | 0.136631  | C | -0.244702 | -3.475393 | -0.732992 |
| C                                             | -2.792744 | -0.124710 | -1.153488 | H | 0.762493  | -3.096632 | -0.933723 |
| H                                             | -2.504209 | 0.067743  | -2.202748 | C | -0.694868 | -3.427632 | 0.601298  |
| H                                             | -3.868163 | -0.359457 | -1.181057 | H | -0.011191 | -2.990791 | 1.327671  |

|   |           |           |          |
|---|-----------|-----------|----------|
| C | -1.732854 | -4.361272 | 1.190821 |
| H | -1.472749 | -4.576144 | 2.235227 |
| H | -1.700832 | -5.331994 | 0.679806 |
| C | -3.150308 | -3.772269 | 1.146289 |
| H | -3.902573 | -4.576206 | 1.219958 |
| H | -3.304351 | -3.135247 | 2.027595 |

**IM3**

M06-L SCF energy in solvent: -3136.790777 a.u

|    |           |           |           |
|----|-----------|-----------|-----------|
| Ir | -0.976827 | -0.805393 | -1.486027 |
| O  | 1.690972  | -0.304158 | 0.830889  |
| O  | 1.728913  | 1.038551  | -1.336918 |
| C  | 2.849373  | -0.942403 | 0.424288  |
| C  | 2.924139  | -2.332473 | 0.643695  |
| H  | 2.088051  | -2.836213 | 1.129006  |
| C  | 4.053846  | -3.012983 | 0.267846  |
| H  | 4.128851  | -4.086393 | 0.437546  |
| C  | 5.130359  | -2.340755 | -0.358273 |
| C  | 6.274162  | -3.044323 | -0.806068 |
| H  | 6.313649  | -4.121629 | -0.645369 |
| C  | 7.305857  | -2.392792 | -1.437939 |
| H  | 8.177487  | -2.947337 | -1.780216 |
| C  | 7.225327  | -1.002342 | -1.654828 |
| H  | 8.031199  | -0.489544 | -2.176621 |
| C  | 6.134089  | -0.286256 | -1.220344 |
| H  | 6.082400  | 0.784178  | -1.405571 |
| C  | 5.060658  | -0.921230 | -0.546282 |
| C  | 3.906609  | -0.204199 | -0.088080 |
| C  | 3.807438  | 1.270301  | -0.178490 |
| C  | 4.770243  | 2.146581  | 0.420610  |
| C  | 5.825695  | 1.674088  | 1.240225  |
| H  | 5.914653  | 0.605587  | 1.423034  |
| C  | 6.723975  | 2.542849  | 1.815742  |
| H  | 7.519323  | 2.152878  | 2.448529  |
| C  | 6.619331  | 3.932168  | 1.601452  |
| H  | 7.340067  | 4.608853  | 2.056360  |
| C  | 5.595435  | 4.426747  | 0.830461  |
| H  | 5.488564  | 5.499843  | 0.671867  |
| C  | 4.643893  | 3.562900  | 0.237295  |
| C  | 3.559708  | 4.073951  | -0.516426 |
| H  | 3.483556  | 5.150619  | -0.666060 |
| C  | 2.603292  | 3.231919  | -1.024170 |
| H  | 1.746175  | 3.599124  | -1.585518 |
| C  | 2.724988  | 1.842794  | -0.825892 |

|   |           |           |           |
|---|-----------|-----------|-----------|
| P | 0.633095  | 0.316108  | -0.293002 |
| N | -0.082145 | 1.492671  | 0.664352  |
| C | -1.739692 | 1.178137  | -1.139391 |
| H | -1.301842 | 1.857562  | -1.890920 |
| H | -2.823977 | 1.171753  | -1.308491 |
| C | -1.480391 | 1.746574  | 0.253151  |
| H | -2.146619 | 1.218414  | 0.953962  |
| C | -1.839429 | 3.213858  | 0.301731  |
| C | -0.888943 | 4.228608  | 0.165378  |
| H | 0.165607  | 3.959402  | 0.088319  |
| C | -1.278748 | 5.565338  | 0.147576  |
| H | -0.525655 | 6.345798  | 0.045728  |
| C | -2.623994 | 5.906018  | 0.263518  |
| H | -2.927546 | 6.951355  | 0.249879  |
| C | -3.578220 | 4.899866  | 0.405886  |
| H | -4.633315 | 5.153500  | 0.502327  |
| C | -3.187101 | 3.565682  | 0.429729  |
| H | -3.930535 | 2.772803  | 0.537475  |
| C | 0.199889  | 1.837818  | 2.093925  |
| H | -0.396673 | 2.751009  | 2.234481  |
| C | -0.372723 | 0.805241  | 3.047957  |
| C | -1.700454 | 0.937548  | 3.475889  |
| H | -2.279363 | 1.804214  | 3.148914  |
| C | -2.285319 | -0.007969 | 4.315200  |
| H | -3.322476 | 0.110607  | 4.625869  |
| C | -1.541788 | -1.096703 | 4.760373  |
| H | -1.997361 | -1.844349 | 5.407438  |
| C | -0.210705 | -1.223814 | 4.369392  |
| H | 0.386111  | -2.066393 | 4.717645  |
| C | 0.367170  | -0.285241 | 3.519047  |
| H | 1.405163  | -0.405815 | 3.217486  |
| C | 1.638555  | 2.231915  | 2.373137  |
| H | 1.972808  | 2.993467  | 1.658850  |
| H | 2.337665  | 1.393885  | 2.324551  |
| H | 1.699104  | 2.659686  | 3.380597  |
| C | -1.648754 | -0.526635 | -3.523693 |
| H | -2.379318 | 0.286994  | -3.571267 |
| C | -0.273357 | -0.133057 | -3.407241 |
| H | -0.097904 | 0.943970  | -3.362227 |
| C | 0.899143  | -0.924170 | -3.976893 |
| H | 1.679936  | -0.218675 | -4.286395 |
| H | 0.588735  | -1.438924 | -4.897085 |
| C | 1.506344  | -1.918757 | -2.976824 |
| H | 1.991267  | -2.757884 | -3.504911 |

|   |           |           |           |    |           |           |           |
|---|-----------|-----------|-----------|----|-----------|-----------|-----------|
| H | 2.307844  | -1.417520 | -2.417782 | Ir | -0.988914 | -1.174094 | -0.970012 |
| C | 0.506033  | -2.457689 | -1.983928 | O  | 1.799768  | -0.023953 | 0.912383  |
| H | 0.932442  | -2.831781 | -1.050449 | O  | 1.616710  | 0.692506  | -1.530027 |
| C | -0.774366 | -2.903658 | -2.332115 | C  | 2.900798  | -0.813879 | 0.584932  |
| H | -1.268695 | -3.574107 | -1.628396 | C  | 2.965318  | -2.092433 | 1.169584  |
| C | -1.273274 | -3.011127 | -3.760885 | H  | 2.194996  | -2.376606 | 1.893476  |
| H | -1.873433 | -3.925406 | -3.853564 | C  | 4.030247  | -2.901179 | 0.857602  |
| H | -0.421245 | -3.156429 | -4.436551 | H  | 4.111216  | -3.890608 | 1.306712  |
| C | -2.106468 | -1.802159 | -4.187287 | C  | 5.032488  | -2.479574 | -0.049922 |
| H | -2.105198 | -1.699054 | -5.286856 | C  | 6.094892  | -3.336220 | -0.428299 |
| H | -3.154791 | -1.975475 | -3.905320 | H  | 6.133792  | -4.334094 | 0.008402  |
| C | -0.978099 | -2.684420 | 0.986470  | C  | 7.049047  | -2.929854 | -1.329681 |
| H | -0.011164 | -2.348132 | 1.379463  | H  | 7.857585  | -3.601150 | -1.613139 |
| H | -0.794512 | -3.492847 | 0.269182  | C  | 6.971220  | -1.642775 | -1.898929 |
| C | -1.745561 | -1.539843 | 0.424180  | H  | 7.714120  | -1.329107 | -2.630169 |
| H | -1.844734 | -0.739348 | 1.164749  | C  | 5.961275  | -0.779509 | -1.543015 |
| C | -2.815818 | -1.656070 | -0.521035 | H  | 5.908404  | 0.207315  | -1.997525 |
| H | -2.982706 | -2.634356 | -0.976850 | C  | 4.972041  | -1.158074 | -0.601155 |
| O | -1.723951 | -3.257306 | 2.097450  | C  | 3.897659  | -0.288111 | -0.221439 |
| C | -0.974817 | -3.967709 | 2.937161  | C  | 3.819327  | 1.113792  | -0.687218 |
| O | 0.211141  | -4.209895 | 2.836928  | C  | 4.867136  | 2.063610  | -0.452760 |
| O | -1.768786 | -4.379793 | 3.941668  | C  | 6.007369  | 1.762859  | 0.333818  |
| C | -1.084736 | -5.135547 | 4.936985  | H  | 6.094443  | 0.777255  | 0.784714  |
| H | -0.328417 | -4.522118 | 5.440449  | C  | 6.992657  | 2.699477  | 0.544980  |
| H | -1.852682 | -5.446221 | 5.646810  | H  | 7.853568  | 2.443523  | 1.159530  |
| H | -0.591403 | -6.008262 | 4.497889  | C  | 6.894548  | 3.987479  | -0.019519 |
| C | -4.017241 | -0.825008 | -0.415840 | H  | 7.684090  | 4.717103  | 0.149222  |
| C | -4.957660 | -0.622126 | -1.423037 | C  | 5.791451  | 4.321310  | -0.767466 |
| C | -4.433652 | -0.075261 | 0.707993  | H  | 5.690780  | 5.319112  | -1.194193 |
| H | -4.994579 | -0.992177 | -2.440438 | C  | 4.751872  | 3.387498  | -0.991735 |
| C | -5.619172 | 0.575542  | 0.382707  | C  | 3.595741  | 3.742715  | -1.726675 |
| H | -3.949146 | -0.052814 | 1.679156  | H  | 3.526340  | 4.744959  | -2.148223 |
| C | -7.041169 | 0.717834  | -1.582462 | C  | 2.567749  | 2.848946  | -1.886836 |
| C | -6.499386 | 1.447926  | 1.052936  | H  | 1.664614  | 3.101192  | -2.438738 |
| C | -7.882736 | 1.564708  | -0.921793 | C  | 2.684082  | 1.555763  | -1.344917 |
| H | -7.185863 | 0.391063  | -2.608072 | P  | 0.658681  | 0.282111  | -0.228335 |
| C | -7.613620 | 1.940146  | 0.419624  | N  | -0.053649 | 1.641111  | 0.427800  |
| H | -6.265212 | 1.719690  | 2.080461  | C  | -1.819007 | 0.807320  | -1.077463 |
| H | -8.757903 | 1.943137  | -1.442065 | H  | -1.484922 | 1.257126  | -2.026005 |
| H | -8.290238 | 2.613468  | 0.939904  | H  | -2.909434 | 0.710733  | -1.135103 |
| N | -5.926736 | 0.224287  | -0.953781 | C  | -1.478909 | 1.757590  | 0.060211  |
|   |           |           |           | H  | -2.076720 | 1.479937  | 0.943049  |
|   |           |           |           | C  | -1.880618 | 3.165828  | -0.317967 |
|   |           |           |           | C  | -0.991915 | 4.071299  | -0.900878 |

**TS1**

M06-L SCF energy in solvent: -3136.768141 a.u

|   |           |           |           |
|---|-----------|-----------|-----------|
| H | 0.052003  | 3.778697  | -1.023736 |
| C | -1.422892 | 5.338270  | -1.284675 |
| H | -0.715827 | 6.038784  | -1.726521 |
| C | -2.750756 | 5.713924  | -1.095891 |
| H | -3.086555 | 6.705720  | -1.393526 |
| C | -3.644833 | 4.815602  | -0.516797 |
| H | -4.684034 | 5.101501  | -0.360798 |
| C | -3.209129 | 3.553646  | -0.127170 |
| H | -3.903724 | 2.846645  | 0.330724  |
| C | 0.307117  | 2.464973  | 1.631653  |
| H | -0.069803 | 3.462412  | 1.362027  |
| C | -0.500376 | 2.004017  | 2.827580  |
| C | -1.619790 | 2.749947  | 3.209595  |
| H | -1.850421 | 3.672711  | 2.672508  |
| C | -2.447280 | 2.318109  | 4.242729  |
| H | -3.317462 | 2.909317  | 4.524821  |
| C | -2.161146 | 1.127805  | 4.905159  |
| H | -2.809229 | 0.777035  | 5.706502  |
| C | -1.042714 | 0.379872  | 4.539631  |
| H | -0.825333 | -0.555251 | 5.052285  |
| C | -0.213660 | 0.815082  | 3.507264  |
| H | 0.649119  | 0.205105  | 3.235285  |
| C | 1.789677  | 2.636669  | 1.902075  |
| H | 2.330242  | 2.909084  | 0.988262  |
| H | 2.258488  | 1.750783  | 2.334341  |
| H | 1.904996  | 3.457883  | 2.618360  |
| C | -1.810638 | -1.349555 | -2.976623 |
| H | -2.588872 | -0.591346 | -3.099448 |
| C | -0.459008 | -0.895012 | -3.053153 |
| H | -0.330143 | 0.175140  | -3.219746 |
| C | 0.704020  | -1.736351 | -3.555703 |
| H | 1.416091  | -1.075622 | -4.063902 |
| H | 0.345240  | -2.429840 | -4.328405 |
| C | 1.439816  | -2.489432 | -2.441878 |
| H | 1.923359  | -3.398724 | -2.836544 |
| H | 2.254909  | -1.861757 | -2.061282 |
| C | 0.556078  | -2.860184 | -1.280433 |
| H | 1.071431  | -2.996513 | -0.328761 |
| C | -0.717341 | -3.418322 | -1.409971 |
| H | -1.113684 | -3.945176 | -0.541322 |
| C | -1.326580 | -3.819060 | -2.738165 |
| H | -1.879624 | -4.756896 | -2.603139 |
| H | -0.525147 | -4.052797 | -3.449928 |
| C | -2.259709 | -2.749779 | -3.304853 |

|   |           |           |           |
|---|-----------|-----------|-----------|
| H | -2.375713 | -2.870464 | -4.395603 |
| H | -3.264716 | -2.885809 | -2.881918 |
| C | -0.860789 | -2.016668 | 1.343175  |
| H | -0.092735 | -1.511469 | 1.920284  |
| H | -0.663355 | -3.051553 | 1.100333  |
| C | -2.068981 | -1.387638 | 1.015332  |
| H | -2.275824 | -0.424632 | 1.484312  |
| C | -2.987082 | -1.891932 | 0.057386  |
| H | -2.961299 | -2.957286 | -0.169715 |
| O | -1.129055 | -2.971953 | 3.404394  |
| C | -0.070600 | -2.694175 | 4.021798  |
| O | 1.015928  | -2.243521 | 3.598747  |
| O | -0.189713 | -2.910928 | 5.397400  |
| C | 0.979784  | -2.629594 | 6.138775  |
| H | 1.270682  | -1.572912 | 6.057119  |
| H | 0.743594  | -2.868223 | 7.180677  |
| H | 1.831467  | -3.233768 | 5.801733  |
| C | -4.253092 | -1.220361 | -0.192491 |
| C | -5.216160 | -1.630060 | -1.112784 |
| C | -4.738272 | -0.046752 | 0.435651  |
| H | -5.245211 | -2.487180 | -1.773974 |
| C | -5.985937 | 0.245557  | -0.100429 |
| H | -4.260950 | 0.506990  | 1.237583  |
| C | -7.434838 | -0.753822 | -1.780181 |
| C | -6.956054 | 1.248623  | 0.103181  |
| C | -8.361817 | 0.223887  | -1.573138 |
| H | -7.550661 | -1.564130 | -2.493612 |
| C | -8.123952 | 1.245003  | -0.615866 |
| H | -6.752461 | 2.016608  | 0.846363  |
| H | -9.280893 | 0.205090  | -2.151151 |
| H | -8.869941 | 2.018985  | -0.455802 |
| N | -6.263639 | -0.751745 | -1.064966 |

#### IM4

M06-L SCF energy in solvent: -2832.852159 a.u.

|    |           |           |           |
|----|-----------|-----------|-----------|
| Ir | -1.251828 | -1.137950 | 0.061116  |
| P  | 0.675576  | 0.096514  | 0.107036  |
| N  | 0.289672  | 1.691762  | 0.383521  |
| O  | 1.483899  | -0.109198 | -1.313566 |
| O  | 1.865932  | -0.103138 | 1.207814  |
| C  | 2.912838  | -1.006715 | 1.030975  |
| C  | 2.999005  | -2.043316 | 1.979083  |
| H  | 2.265937  | -2.072794 | 2.784202  |
| C  | 4.009934  | -2.965877 | 1.880386  |

|   |           |           |           |   |           |           |           |
|---|-----------|-----------|-----------|---|-----------|-----------|-----------|
| H | 4.098367  | -3.764875 | 2.615020  | H | 2.800487  | 3.703458  | 1.633276  |
| C | 4.940857  | -2.905183 | 0.815947  | C | -1.143273 | 1.962827  | 0.145018  |
| C | 5.946322  | -3.890092 | 0.663249  | H | -1.644157 | 1.990813  | 1.127956  |
| H | 6.005466  | -4.689760 | 1.400749  | C | -1.737050 | 0.826507  | -0.675828 |
| C | 6.821122  | -3.848851 | -0.395353 | H | -1.392051 | 0.914388  | -1.718208 |
| H | 7.586765  | -4.613678 | -0.504054 | H | -2.831676 | 0.908740  | -0.700431 |
| C | 6.711434  | -2.821604 | -1.353926 | C | -1.373502 | 3.298007  | -0.523563 |
| H | 7.384259  | -2.807774 | -2.208812 | C | -0.498449 | 3.792016  | -1.494186 |
| C | 5.757352  | -1.839215 | -1.225133 | H | 0.410468  | 3.233244  | -1.720045 |
| H | 5.682471  | -1.063236 | -1.982323 | C | -0.767521 | 4.994100  | -2.139659 |
| C | 4.856799  | -1.832819 | -0.130882 | H | -0.074505 | 5.373551  | -2.888388 |
| C | 3.851161  | -0.820540 | 0.027295  | C | -1.915733 | 5.717405  | -1.822888 |
| C | 3.794828  | 0.357530  | -0.866749 | H | -2.123519 | 6.659716  | -2.325571 |
| C | 4.913655  | 1.236851  | -1.057907 | C | -2.789244 | 5.236522  | -0.850907 |
| C | 6.104303  | 1.135788  | -0.296673 | H | -3.679737 | 5.804113  | -0.588255 |
| H | 6.182956  | 0.366269  | 0.467721  | C | -2.515382 | 4.035576  | -0.202761 |
| C | 7.153301  | 2.002192  | -0.502553 | H | -3.192715 | 3.664138  | 0.569645  |
| H | 8.053098  | 1.909266  | 0.102060  | C | -1.375565 | -0.857003 | 2.223861  |
| C | 7.072627  | 3.011297  | -1.483178 | H | -1.228386 | -1.828977 | 2.699336  |
| H | 7.913860  | 3.682372  | -1.641904 | H | -0.790188 | -0.056197 | 2.680879  |
| C | 5.923706  | 3.154324  | -2.221645 | C | -2.662026 | -0.502708 | 1.720883  |
| H | 5.838076  | 3.942704  | -2.968442 | H | -2.905225 | 0.558046  | 1.657149  |
| C | 4.817363  | 2.293827  | -2.022096 | C | -3.561692 | -1.393473 | 1.120217  |
| C | 3.615890  | 2.473079  | -2.749041 | H | -3.477186 | -2.457269 | 1.335804  |
| H | 3.564249  | 3.263251  | -3.496671 | C | -0.845453 | -1.710704 | -2.042193 |
| C | 2.523979  | 1.681119  | -2.499152 | H | -0.577582 | -0.787840 | -2.555998 |
| H | 1.583295  | 1.806622  | -3.031525 | C | -2.218365 | -1.909229 | -1.789127 |
| C | 2.627594  | 0.657149  | -1.543282 | H | -2.912429 | -1.133114 | -2.123179 |
| C | 0.960998  | 2.662755  | 1.322025  | C | -2.843418 | -3.261003 | -1.562631 |
| H | 0.477137  | 3.611049  | 1.047696  | H | -2.980961 | -3.763815 | -2.533719 |
| C | 0.585161  | 2.371370  | 2.761858  | H | -3.855754 | -3.100331 | -1.172053 |
| C | -0.617302 | 2.883987  | 3.267474  | C | -2.057724 | -4.162978 | -0.603606 |
| H | -1.213841 | 3.552165  | 2.643348  | H | -2.752087 | -4.857664 | -0.115703 |
| C | -1.044577 | 2.579001  | 4.557299  | H | -1.354885 | -4.799622 | -1.156063 |
| H | -1.980873 | 2.989873  | 4.930138  | C | -1.294156 | -3.411243 | 0.469281  |
| C | -0.260811 | 1.768472  | 5.374277  | H | -1.668478 | -3.515553 | 1.489074  |
| H | -0.586300 | 1.532173  | 6.385391  | C | 0.039349  | -3.032823 | 0.337405  |
| C | 0.957997  | 1.287154  | 4.899913  | H | 0.604458  | -2.868819 | 1.256621  |
| H | 1.591784  | 0.681126  | 5.544923  | C | 0.864512  | -3.245747 | -0.903526 |
| C | 1.378396  | 1.587137  | 3.607456  | H | 1.175206  | -4.302235 | -0.945438 |
| H | 2.335111  | 1.207492  | 3.255820  | H | 1.793224  | -2.671170 | -0.805878 |
| C | 2.442315  | 2.841971  | 1.059287  | C | 0.154980  | -2.842193 | -2.203042 |
| H | 2.623795  | 3.041542  | -0.003138 | H | 0.911451  | -2.531143 | -2.931549 |
| H | 3.044513  | 1.977762  | 1.351528  | H | -0.353140 | -3.704665 | -2.653939 |

|   |           |           |           |   |           |          |           |
|---|-----------|-----------|-----------|---|-----------|----------|-----------|
| C | -4.779381 | -0.963197 | 0.479182  | H | 7.578898  | 4.375990 | 1.917613  |
| C | -5.777974 | -1.833119 | 0.033802  | C | 5.774843  | 4.284886 | 0.769110  |
| C | -5.205325 | 0.359402  | 0.192139  | H | 5.697152  | 5.364977 | 0.644059  |
| H | -5.856676 | -2.911169 | 0.099702  | C | 4.768561  | 3.469707 | 0.198095  |
| C | -6.450032 | 0.281847  | -0.416764 | C | 3.667866  | 4.035975 | -0.489594 |
| H | -4.691760 | 1.283875  | 0.428200  | H | 3.621086  | 5.118452 | -0.606946 |
| C | -7.976966 | -1.503481 | -1.056902 | C | 2.662402  | 3.239446 | -0.974535 |
| C | -7.373257 | 1.223140  | -0.921591 | H | 1.793828  | 3.650351 | -1.485831 |
| C | -8.856331 | -0.582340 | -1.537657 | C | 2.743147  | 1.840553 | -0.821485 |
| H | -8.141933 | -2.576126 | -1.072701 | P | 0.600342  | 0.362246 | -0.268133 |
| C | -8.554684 | 0.804926  | -1.472681 | N | -0.038279 | 1.568795 | 0.734464  |
| H | -7.118487 | 2.278113  | -0.860011 | C | -1.772337 | 1.330378 | -1.013468 |
| H | -9.790569 | -0.927813 | -1.969173 | H | -1.410951 | 2.046816 | -1.766813 |
| H | -9.265696 | 1.528447  | -1.861454 | H | -2.867746 | 1.293263 | -1.111632 |
| N | -6.787203 | -1.088410 | -0.504162 | C | -1.431805 | 1.884239 | 0.371463  |

### IM3'

M06-L SCF energy in solvent: -3136.773999 a.u

|    |           |           |           |   |           |           |          |
|----|-----------|-----------|-----------|---|-----------|-----------|----------|
| Ir | -0.993321 | -0.616235 | -1.523400 | H | 0.302053  | 4.039563  | 0.262184 |
| O  | 1.709111  | -0.262652 | 0.825038  | C | -1.083776 | 5.698720  | 0.308447 |
| O  | 1.704623  | 1.089004  | -1.317617 | H | -0.300959 | 6.451890  | 0.227480 |
| C  | 2.810556  | -0.954043 | 0.360535  | C | -2.417318 | 6.088099  | 0.398124 |
| C  | 2.823054  | -2.350585 | 0.546858  | H | -2.682865 | 7.143679  | 0.384993 |
| H  | 1.990656  | -2.824209 | 1.065654  | C | -3.410330 | 5.116350  | 0.510533 |
| C  | 3.904386  | -3.076007 | 0.115419  | H | -4.456811 | 5.410027  | 0.582030 |
| H  | 3.933547  | -4.154904 | 0.265383  | C | -3.066244 | 3.769505  | 0.530126 |
| C  | 4.989348  | -2.444516 | -0.537862 | H | -3.841074 | 3.002876  | 0.604710 |
| C  | 6.082361  | -3.191880 | -1.038562 | C | 0.286427  | 1.866819  | 2.163621 |
| H  | 6.075650  | -4.272942 | -0.898626 | H | -0.264642 | 2.802585  | 2.343170 |
| C  | 7.122209  | -2.577381 | -1.693821 | C | -0.318856 | 0.833606  | 3.098490 |
| H  | 7.954613  | -3.165356 | -2.076207 | C | -1.618554 | 1.029051  | 3.584838 |
| C  | 7.101091  | -1.180461 | -1.882333 | H | -2.139113 | 1.957822  | 3.338338 |
| H  | 7.913486  | -0.695667 | -2.420800 | C | -2.249894 | 0.066815  | 4.371321 |
| C  | 6.060480  | -0.422820 | -1.397599 | H | -3.266914 | 0.235530  | 4.723610 |
| H  | 6.053118  | 0.653025  | -1.558369 | C | -1.577423 | -1.104255 | 4.710297 |
| C  | 4.981181  | -1.019907 | -0.698164 | H | -2.066742 | -1.866258 | 5.314850 |
| C  | 3.881010  | -0.259241 | -0.183983 | C | -0.266222 | -1.287490 | 4.277627 |
| C  | 3.836679  | 1.218054  | -0.239455 | H | 0.286066  | -2.182499 | 4.560219 |
| C  | 4.854595  | 2.045538  | 0.337423  | C | 0.355874  | -0.333030 | 3.478116 |
| C  | 5.930384  | 1.516332  | 1.094482  | H | 1.374259  | -0.504606 | 3.138968 |
| H  | 5.991344  | 0.440723  | 1.244020  | C | 1.746806  | 2.186257  | 2.430147 |
| C  | 6.883232  | 2.338521  | 1.650177  | H | 2.103455  | 2.947272  | 1.726214 |
| H  | 7.693626  | 1.904490  | 2.233348  | H | 2.405163  | 1.318299  | 2.347929 |
| C  | 6.815992  | 3.735970  | 1.478279  | H | 1.841842  | 2.589407  | 3.445301 |

|   |           |           |           |
|---|-----------|-----------|-----------|
| C | -2.407172 | -0.712503 | -3.136133 |
| H | -3.307828 | -0.134550 | -2.902258 |
| C | -1.245976 | 0.051954  | -3.524705 |
| H | -1.376934 | 1.136518  | -3.522013 |
| C | -0.203936 | -0.429156 | -4.522849 |
| H | 0.156144  | 0.426328  | -5.107788 |
| H | -0.664919 | -1.106569 | -5.254826 |
| C | 0.983932  | -1.094605 | -3.825311 |
| H | 1.503349  | -1.792683 | -4.504185 |
| H | 1.720736  | -0.328553 | -3.554248 |
| C | 0.596897  | -1.816730 | -2.560124 |
| H | 1.425765  | -1.987428 | -1.868263 |
| C | -0.519410 | -2.658498 | -2.431133 |
| H | -0.468552 | -3.402016 | -1.636596 |
| C | -1.452332 | -3.013650 | -3.574607 |
| H | -1.771488 | -4.057299 | -3.455115 |
| H | -0.895499 | -2.990978 | -4.520724 |
| C | -2.683522 | -2.105388 | -3.649363 |
| H | -3.086313 | -2.088012 | -4.677817 |
| H | -3.482537 | -2.544881 | -3.032573 |
| C | -0.808614 | -2.804680 | 0.920058  |
| H | -0.218577 | -1.997150 | 1.373444  |
| H | -0.136592 | -3.412751 | 0.302504  |
| C | -1.986941 | -2.264840 | 0.190994  |
| H | -2.521171 | -2.937812 | -0.482035 |
| C | -2.603270 | -1.145949 | 0.676456  |
| H | -2.088316 | -0.624127 | 1.488817  |
| O | -1.320832 | -3.648009 | 1.994332  |
| C | -0.375212 | -4.169279 | 2.772250  |
| O | 0.826605  | -4.080419 | 2.620222  |
| O | -0.986016 | -4.816996 | 3.777262  |
| C | -0.084884 | -5.454363 | 4.681015  |
| H | 0.589573  | -4.724789 | 5.141124  |
| H | -0.715618 | -5.921023 | 5.438313  |
| H | 0.515503  | -6.209578 | 4.164192  |
| C | -3.920542 | -0.650298 | 0.359765  |
| C | -4.537175 | 0.367635  | 1.088346  |
| C | -4.812783 | -1.043843 | -0.664336 |
| H | -4.198323 | 0.906451  | 1.965885  |
| C | -5.956947 | -0.266966 | -0.555944 |
| H | -4.636246 | -1.796944 | -1.422748 |
| C | -6.730298 | 1.509130  | 0.921971  |
| C | -7.175676 | -0.174041 | -1.261772 |
| C | -7.901213 | 1.584405  | 0.229339  |

|   |           |           |           |
|---|-----------|-----------|-----------|
| H | -6.483043 | 2.129098  | 1.778924  |
| C | -8.133119 | 0.730003  | -0.882381 |
| H | -7.328513 | -0.838838 | -2.108741 |
| H | -8.649139 | 2.306967  | 0.542105  |
| H | -9.070679 | 0.798283  | -1.428118 |
| N | -5.768230 | 0.604092  | 0.546200  |

**TS1'**

M06-L SCF energy in solvent: -3136.761719 a.u

|    |           |           |           |
|----|-----------|-----------|-----------|
| Ir | -1.470382 | -0.305664 | -0.600429 |
| O  | 1.766722  | -0.076667 | 0.913931  |
| O  | 1.637104  | -0.451553 | -1.599002 |
| C  | 2.181798  | -1.391095 | 1.103233  |
| C  | 1.624617  | -2.077909 | 2.198545  |
| H  | 0.952015  | -1.535758 | 2.866889  |
| C  | 1.989799  | -3.383525 | 2.409899  |
| H  | 1.580773  | -3.933926 | 3.256637  |
| C  | 2.883636  | -4.044704 | 1.532439  |
| C  | 3.202361  | -5.413703 | 1.700855  |
| H  | 2.750611  | -5.949268 | 2.535694  |
| C  | 4.047903  | -6.058651 | 0.830674  |
| H  | 4.279600  | -7.112936 | 0.970481  |
| C  | 4.605605  | -5.353371 | -0.254852 |
| H  | 5.257596  | -5.869924 | -0.957103 |
| C  | 4.328871  | -4.018426 | -0.439516 |
| H  | 4.759516  | -3.488301 | -1.286350 |
| C  | 3.476471  | -3.316985 | 0.449488  |
| C  | 3.151294  | -1.930864 | 0.272998  |
| C  | 3.793623  | -1.095481 | -0.765115 |
| C  | 5.216651  | -0.930958 | -0.839851 |
| C  | 6.098067  | -1.473161 | 0.129079  |
| H  | 5.685778  | -2.033279 | 0.964812  |
| C  | 7.457761  | -1.286615 | 0.038313  |
| H  | 8.109673  | -1.706370 | 0.802177  |
| C  | 8.014183  | -0.550213 | -1.027034 |
| H  | 9.092068  | -0.414643 | -1.090291 |
| C  | 7.188555  | 0.008435  | -1.972114 |
| H  | 7.600612  | 0.597718  | -2.791288 |
| C  | 5.783823  | -0.150863 | -1.900640 |
| C  | 4.928410  | 0.463473  | -2.846154 |
| H  | 5.369036  | 1.040885  | -3.658195 |
| C  | 3.566604  | 0.361702  | -2.725027 |
| H  | 2.889281  | 0.848802  | -3.423247 |
| C  | 3.015911  | -0.393989 | -1.671959 |



|   |           |           |           |   |           |           |           |
|---|-----------|-----------|-----------|---|-----------|-----------|-----------|
| P | 0.782386  | 0.275897  | -0.359919 | H | 0.988681  | -2.802430 | -1.146041 |
| N | 0.936808  | 1.929156  | -0.399411 | C | -0.907382 | -2.539830 | -0.219371 |
| C | -1.336332 | 1.688640  | -1.373765 | H | -0.445560 | -2.569921 | 0.768913  |
| H | -1.110840 | 1.574871  | -2.444915 | C | -2.293324 | -2.473779 | -0.286970 |
| H | -2.318211 | 2.176678  | -1.326370 | H | -2.834594 | -2.426294 | 0.654144  |
| C | -0.304801 | 2.646100  | -0.779659 | C | -3.110160 | -2.953907 | -1.466362 |
| H | -0.706480 | 3.114966  | 0.134377  | H | -4.022774 | -3.425026 | -1.080774 |
| C | -0.027576 | 3.753675  | -1.772567 | H | -2.559420 | -3.748167 | -1.987099 |
| C | 0.721060  | 3.500677  | -2.926317 | C | -3.493314 | -1.829771 | -2.428541 |
| H | 1.145028  | 2.504816  | -3.070464 | H | -3.686905 | -2.231419 | -3.437809 |
| C | 0.938828  | 4.501881  | -3.865007 | H | -4.437896 | -1.382934 | -2.096519 |
| H | 1.531157  | 4.292803  | -4.754544 | C | -1.277732 | 0.685850  | 1.702434  |
| C | 0.398359  | 5.772408  | -3.667619 | H | -1.169984 | 1.730485  | 1.429720  |
| H | 0.566155  | 6.557551  | -4.402646 | H | -0.471087 | 0.204833  | 2.247197  |
| C | -0.352039 | 6.032496  | -2.524802 | C | -2.449624 | -0.020837 | 1.414753  |
| H | -0.772678 | 7.023306  | -2.361648 | H | -2.592252 | -0.970454 | 1.931996  |
| C | -0.559270 | 5.028561  | -1.580298 | C | -3.413033 | 0.419952  | 0.470873  |
| H | -1.128374 | 5.236542  | -0.673242 | H | -3.383725 | 1.477060  | 0.205807  |
| C | 2.003655  | 2.848614  | 0.116573  | O | -1.548828 | 1.409169  | 3.826881  |
| H | 2.157853  | 3.558119  | -0.711264 | C | -0.643964 | 0.829443  | 4.482367  |
| C | 1.492433  | 3.643289  | 1.301149  | O | 0.132909  | -0.088379 | 4.144470  |
| C | 1.450185  | 5.037199  | 1.222492  | O | -0.510957 | 1.354625  | 5.767838  |
| H | 1.764538  | 5.528075  | 0.299579  | C | 0.536192  | 0.784515  | 6.526928  |
| C | 1.006288  | 5.795494  | 2.302450  | H | 1.513236  | 0.946790  | 6.051519  |
| H | 0.978760  | 6.881806  | 2.227546  | H | 0.510316  | 1.282152  | 7.501512  |
| C | 0.588849  | 5.160635  | 3.468827  | H | 0.402973  | -0.296664 | 6.656232  |
| H | 0.229329  | 5.748456  | 4.311871  | C | -4.707795 | -0.214243 | 0.286783  |
| C | 0.623783  | 3.770121  | 3.558021  | C | -5.689450 | 0.265924  | -0.579339 |
| H | 0.274824  | 3.270209  | 4.459450  | C | -5.216985 | -1.383224 | 0.899133  |
| C | 1.079104  | 3.014239  | 2.480106  | H | -5.688520 | 1.129003  | -1.233957 |
| H | 1.108618  | 1.925407  | 2.563014  | C | -6.493604 | -1.610433 | 0.400476  |
| C | 3.361769  | 2.239096  | 0.420187  | H | -4.740733 | -1.978532 | 1.669298  |
| H | 3.772728  | 1.687595  | -0.430294 | C | -7.959191 | -0.514840 | -1.202392 |
| H | 3.349687  | 1.588112  | 1.296788  | C | -7.491650 | -2.583694 | 0.610989  |
| H | 4.042520  | 3.071127  | 0.633569  | C | -8.911846 | -1.467525 | -0.992427 |
| C | -2.453479 | -0.743537 | -2.503080 | H | -8.069313 | 0.318664  | -1.889543 |
| H | -2.813896 | 0.194438  | -2.935925 | C | -8.680577 | -2.521318 | -0.069917 |
| C | -1.052120 | -0.991897 | -2.611215 | H | -7.289956 | -3.379153 | 1.324727  |
| H | -0.474577 | -0.214378 | -3.114898 | H | -9.846617 | -1.402726 | -1.541427 |
| C | -0.434306 | -2.379052 | -2.719099 | H | -9.447116 | -3.274311 | 0.093138  |
| H | 0.471475  | -2.304952 | -3.331626 | N | -6.767721 | -0.573644 | -0.522985 |
| H | -1.119666 | -3.031004 | -3.278872 |   |           |           |           |
| C | -0.060888 | -3.017546 | -1.370860 |   |           |           |           |
| H | -0.134904 | -4.115815 | -1.434245 |   |           |           |           |

**IM4'**

M06-L SCF energy in solvent: -2832.846291 a.u

|    |           |           |           |   |           |           |           |
|----|-----------|-----------|-----------|---|-----------|-----------|-----------|
| Ir | -1.413144 | -0.590334 | -0.074494 | H | 1.321587  | 3.304786  | -1.794410 |
| O  | 1.791703  | -0.201018 | 1.201890  | C | 0.552848  | 5.237240  | -2.375322 |
| O  | 1.538553  | -0.211173 | -1.335406 | H | 1.379561  | 5.447314  | -3.051674 |
| C  | 2.604975  | -1.328905 | 1.108741  | C | -0.461414 | 6.176418  | -2.201911 |
| C  | 2.397449  | -2.317216 | 2.087776  | H | -0.432256 | 7.118946  | -2.744603 |
| H  | 1.636778  | -2.144709 | 2.847509  | C | -1.505994 | 5.909785  | -1.320189 |
| C  | 3.168566  | -3.451521 | 2.073912  | H | -2.293745 | 6.645073  | -1.168726 |
| H  | 3.029542  | -4.220876 | 2.831839  | C | -1.535466 | 4.707583  | -0.619663 |
| C  | 4.144362  | -3.646902 | 1.067793  | H | -2.347998 | 4.502581  | 0.081146  |
| C  | 4.903179  | -4.840414 | 1.008034  | C | 1.521448  | 2.701760  | 1.188840  |
| H  | 4.732710  | -5.601888 | 1.768067  | H | 1.279679  | 3.718125  | 0.846868  |
| C  | 5.827026  | -5.041386 | 0.011313  | C | 1.025818  | 2.588267  | 2.616010  |
| H  | 6.403447  | -5.963139 | -0.024617 | C | -0.023535 | 3.416747  | 3.034482  |
| C  | 6.016001  | -4.054237 | -0.976409 | H | -0.406425 | 4.175488  | 2.348963  |
| H  | 6.729114  | -4.225387 | -1.780169 | C | -0.565442 | 3.301002  | 4.312272  |
| C  | 5.306383  | -2.876202 | -0.938609 | H | -1.379678 | 3.955446  | 4.617835  |
| H  | 5.461394  | -2.131005 | -1.714629 | C | -0.051666 | 2.360625  | 5.200894  |
| C  | 4.364109  | -2.622886 | 0.089368  | H | -0.467927 | 2.268857  | 6.202134  |
| C  | 3.610558  | -1.401987 | 0.157876  | C | 1.018985  | 1.558035  | 4.811039  |
| C  | 3.869755  | -0.270452 | -0.760802 | H | 1.447774  | 0.845076  | 5.513243  |
| C  | 5.165531  | 0.333343  | -0.892239 | C | 1.555198  | 1.672444  | 3.531968  |
| C  | 6.256911  | -0.011337 | -0.057326 | H | 2.398528  | 1.047198  | 3.247281  |
| H  | 6.118418  | -0.762172 | 0.716723  | C | 3.016294  | 2.534457  | 1.004744  |
| C  | 7.480946  | 0.600873  | -0.200465 | H | 3.291783  | 2.644201  | -0.050664 |
| H  | 8.300225  | 0.324106  | 0.459929  | H | 3.398894  | 1.573949  | 1.358991  |
| C  | 7.683176  | 1.585416  | -1.188226 | H | 3.527093  | 3.320979  | 1.570876  |
| H  | 8.659038  | 2.053401  | -1.296344 | C | -2.471489 | -1.191947 | -1.923930 |
| C  | 6.640609  | 1.961196  | -1.999755 | H | -2.964731 | -0.299172 | -2.318545 |
| H  | 6.775973  | 2.735315  | -2.754017 | C | -1.078545 | -1.297099 | -2.138445 |
| C  | 5.362895  | 1.366981  | -1.866683 | H | -0.614374 | -0.468648 | -2.672882 |
| C  | 4.275155  | 1.792534  | -2.666599 | C | -0.332332 | -2.614580 | -2.249937 |
| H  | 4.443435  | 2.559192  | -3.421444 | H | 0.487148  | -2.487808 | -2.965608 |
| C  | 3.021315  | 1.269327  | -2.476152 | H | -1.001464 | -3.363671 | -2.692332 |
| H  | 2.164132  | 1.591551  | -3.063741 | C | 0.247852  | -3.120304 | -0.924163 |
| C  | 2.838119  | 0.268650  | -1.506856 | H | 0.344281  | -4.217988 | -0.939857 |
| P  | 0.726894  | 0.210105  | 0.035877  | H | 1.268548  | -2.739017 | -0.803636 |
| N  | 0.684623  | 1.859469  | 0.258120  | C | -0.559888 | -2.728855 | 0.283937  |
| C  | -1.395504 | 1.411237  | -0.907506 | H | -0.005552 | -2.674576 | 1.222507  |
| H  | -0.935249 | 1.360786  | -1.907680 | C | -1.943538 | -2.831526 | 0.367024  |
| H  | -2.423745 | 1.754691  | -1.069779 | H | -2.359958 | -2.858757 | 1.372940  |
| C  | -0.633635 | 2.430872  | -0.076858 | C | -2.821874 | -3.410187 | -0.722488 |
| H  | -1.185230 | 2.607908  | 0.864582  | H | -3.654747 | -3.943590 | -0.249196 |
| C  | -0.529675 | 3.754861  | -0.798325 | H | -2.256244 | -4.177091 | -1.266405 |
| C  | 0.518180  | 4.033343  | -1.679359 | C | -3.389517 | -2.362638 | -1.685035 |

|   |           |           |           |
|---|-----------|-----------|-----------|
| H | -3.647421 | -2.827824 | -2.650487 |
| H | -4.335050 | -1.980305 | -1.280795 |
| C | -1.458681 | 0.031956  | 2.021789  |
| H | -1.204392 | 1.088792  | 2.122911  |
| H | -0.909478 | -0.596156 | 2.726394  |
| C | -2.817127 | -0.338095 | 1.764768  |
| H | -3.180559 | -1.284419 | 2.161039  |
| C | -3.659772 | 0.353493  | 0.900311  |
| H | -3.381387 | 1.368153  | 0.620047  |
| C | -4.966913 | -0.090377 | 0.504859  |
| C | -5.782939 | 0.598848  | -0.395165 |
| C | -5.648382 | -1.274005 | 0.887738  |
| H | -5.631682 | 1.541062  | -0.907499 |
| C | -6.869479 | -1.289226 | 0.229858  |
| H | -5.309024 | -2.031635 | 1.584470  |
| C | -8.025935 | 0.166984  | -1.346361 |
| C | -7.976198 | -2.166716 | 0.194381  |
| C | -9.080552 | -0.692232 | -1.371121 |
| H | -7.974267 | 1.091712  | -1.912179 |
| C | -9.060863 | -1.879647 | -0.589736 |
| H | -7.940793 | -3.065548 | 0.804539  |
| H | -9.936734 | -0.451359 | -1.993361 |
| H | -9.912446 | -2.553841 | -0.615878 |
| N | -6.930857 | -0.118445 | -0.563578 |

### CO<sub>2</sub>

M06-L SCF energy in solvent: -188.652161 a.u

|   |          |          |           |
|---|----------|----------|-----------|
| O | 0.000000 | 0.000000 | 1.168437  |
| C | 0.000000 | 0.000000 | 0.000000  |
| O | 0.000000 | 0.000000 | -1.168437 |

### MeOH

M06-L SCF energy in solvent: -115.753470 a.u

|   |           |           |           |
|---|-----------|-----------|-----------|
| C | 0.655674  | -0.019227 | 0.000000  |
| H | 1.073332  | 0.991531  | -0.000001 |
| H | 1.037125  | -0.541756 | -0.893053 |
| H | 1.037125  | -0.541754 | 0.893054  |
| O | -0.744895 | 0.121784  | 0.000000  |
| H | -1.122472 | -0.766936 | 0.000000  |

### TS2-cis

M06-L SCF energy in solvent: -8423.353163 a.u

|   |           |           |          |
|---|-----------|-----------|----------|
| C | -6.834606 | -2.001876 | 0.177952 |
| C | -7.928311 | -2.924226 | 0.067317 |

|   |           |           |           |
|---|-----------|-----------|-----------|
| H | -8.800318 | -2.933598 | 0.711378  |
| C | -7.632416 | -3.838967 | -0.978431 |
| H | -8.241791 | -4.687375 | -1.269981 |
| C | -5.844783 | -2.356785 | -0.828483 |
| C | -6.368723 | -3.492882 | -1.532817 |
| H | -5.854307 | -4.030143 | -2.322307 |
| C | -6.087523 | 0.403301  | 2.832062  |
| C | -7.610497 | 0.473578  | 2.661046  |
| H | -8.173580 | 0.281931  | 3.579690  |
| N | -5.666577 | -0.474195 | 1.724205  |
| C | -6.738658 | -0.996132 | 1.222528  |
| O | -7.918134 | -0.598296 | 1.737436  |
| H | -7.964541 | 1.406550  | 2.207777  |
| H | -5.621013 | 1.390619  | 2.691366  |
| C | -5.666144 | -0.144537 | 4.204083  |
| C | -4.189190 | -0.498146 | 4.248221  |
| C | -6.011744 | 0.866823  | 5.289885  |
| H | -6.253692 | -1.064433 | 4.377481  |
| H | -3.928830 | -1.259318 | 3.505192  |
| H | -3.905384 | -0.870506 | 5.240004  |
| H | -3.575320 | 0.391557  | 4.041641  |
| H | -7.074246 | 1.139592  | 5.297333  |
| H | -5.435245 | 1.792146  | 5.151183  |
| H | -5.770052 | 0.475228  | 6.283949  |
| P | -4.277051 | -1.494460 | -1.135355 |
| C | -4.637819 | -0.566150 | -2.674046 |
| C | -3.623327 | -0.277282 | -3.598395 |
| C | -5.912059 | -0.022079 | -2.879761 |
| C | -3.879861 | 0.529654  | -4.702484 |
| H | -2.625243 | -0.694615 | -3.457082 |
| C | -6.167630 | 0.785411  | -3.985373 |
| H | -6.714538 | -0.244807 | -2.174174 |
| C | -5.153167 | 1.062296  | -4.900149 |
| H | -3.080815 | 0.739776  | -5.411669 |
| H | -7.166053 | 1.192769  | -4.136748 |
| H | -5.354876 | 1.689668  | -5.765998 |
| C | -3.138788 | -2.812949 | -1.688747 |
| C | -2.086333 | -3.204842 | -0.851710 |
| C | -3.295715 | -3.445816 | -2.930073 |
| C | -1.225391 | -4.229690 | -1.239006 |
| H | -1.934975 | -2.692913 | 0.099568  |
| C | -2.433817 | -4.467181 | -3.313985 |
| H | -4.086715 | -3.121793 | -3.606820 |
| C | -1.400329 | -4.864725 | -2.465865 |

|    |           |           |           |   |           |           |           |
|----|-----------|-----------|-----------|---|-----------|-----------|-----------|
| H  | -0.405125 | -4.521037 | -0.583959 | N | 4.801785  | 1.824221  | 0.656313  |
| H  | -2.564385 | -4.951078 | -4.279993 | C | 5.394080  | -1.952571 | 0.610329  |
| H  | -0.725067 | -5.662713 | -2.769052 | C | 4.575458  | -2.997964 | 1.077473  |
| Cu | -3.835557 | -0.390784 | 0.705728  | H | 3.717334  | -2.742105 | 1.698474  |
| O  | -2.151661 | -1.209646 | 1.778551  | C | 4.884997  | -4.294436 | 0.753881  |
| C  | -1.496330 | -0.279133 | 2.277639  | H | 4.268715  | -5.116751 | 1.115686  |
| O  | -0.489055 | -0.515487 | 3.121456  | C | 6.000698  | -4.585921 | -0.067291 |
| C  | -1.695363 | 1.129348  | 1.944515  | C | 6.297960  | -5.914941 | -0.453733 |
| N  | -2.982165 | 1.365279  | 1.444210  | H | 5.655413  | -6.716144 | -0.089113 |
| C  | -3.435952 | 2.587783  | 1.427457  | C | 7.363951  | -6.191903 | -1.274878 |
| H  | -2.864249 | 3.382012  | 1.920356  | H | 7.581262  | -7.217631 | -1.565165 |
| C  | -4.640972 | 3.050670  | 0.770911  | C | 8.170448  | -5.139378 | -1.752392 |
| C  | -4.991575 | 4.402861  | 0.936208  | H | 9.000214  | -5.357084 | -2.421906 |
| C  | -5.447908 | 2.261111  | -0.068517 | C | 7.916922  | -3.838064 | -1.385956 |
| C  | -6.105317 | 4.947513  | 0.315805  | H | 8.543876  | -3.038225 | -1.772355 |
| H  | -4.361211 | 5.040019  | 1.556608  | C | 6.841310  | -3.516984 | -0.520150 |
| C  | -6.568742 | 2.788578  | -0.689393 | C | 6.552818  | -2.170304 | -0.117918 |
| H  | -5.170607 | 1.222888  | -0.259447 | C | 7.428316  | -1.032676 | -0.480221 |
| C  | -6.893640 | 4.131832  | -0.492911 | C | 8.823868  | -1.002821 | -0.152072 |
| H  | -6.361811 | 5.995447  | 0.446561  | C | 9.438816  | -1.993336 | 0.653959  |
| H  | -7.183269 | 2.173146  | -1.343140 | H | 8.835166  | -2.809120 | 1.044955  |
| C  | -0.156898 | -1.907458 | 3.326163  | C | 10.778277 | -1.929324 | 0.960742  |
| H  | 0.022957  | -2.366556 | 2.342536  | H | 11.222798 | -2.697984 | 1.590028  |
| H  | -1.027006 | -2.410788 | 3.765886  | C | 11.578426 | -0.875645 | 0.475161  |
| C  | -4.450836 | -4.089047 | 1.514885  | H | 12.638070 | -0.841460 | 0.718921  |
| C  | -5.574720 | -3.995807 | 2.387571  | C | 11.010685 | 0.114044  | -0.290002 |
| H  | -5.737600 | -3.215261 | 3.125229  | H | 11.611676 | 0.946559  | -0.654787 |
| C  | -6.476631 | -5.052095 | 2.067710  | C | 9.631422  | 0.090227  | -0.608137 |
| H  | -7.442779 | -5.227204 | 2.528463  | C | 9.032136  | 1.137469  | -1.348990 |
| C  | -4.660911 | -5.205327 | 0.646082  | H | 9.658119  | 1.953673  | -1.707707 |
| H  | -4.006633 | -5.513753 | -0.163771 | C | 7.680687  | 1.143720  | -1.583647 |
| C  | -5.911852 | -5.801209 | 0.992221  | H | 7.190656  | 1.949266  | -2.126778 |
| H  | -6.374338 | -6.647253 | 0.495302  | C | 6.894639  | 0.070914  | -1.124284 |
| H  | -3.613055 | -3.395810 | 1.493345  | C | 3.760654  | 2.843437  | 0.398926  |
| C  | -1.000589 | 2.165937  | 2.776618  | H | 3.034427  | 2.809322  | 1.232617  |
| H  | -0.816679 | 3.080023  | 2.195963  | C | 4.328280  | 4.240854  | 0.338088  |
| H  | -0.036751 | 1.790556  | 3.128204  | C | 5.558403  | 4.506439  | -0.270062 |
| H  | -1.596388 | 2.447524  | 3.657828  | H | 6.151419  | 3.670788  | -0.645404 |
| Fe | -6.164678 | -3.862210 | 0.446054  | C | 6.027650  | 5.811697  | -0.371990 |
| Cl | -8.280045 | 4.802788  | -1.294302 | H | 6.990549  | 6.005349  | -0.841623 |
| Ir | 2.307205  | 0.471508  | -0.951963 | C | 5.271852  | 6.870228  | 0.129419  |
| P  | 4.459216  | 0.390973  | -0.145877 | H | 5.642087  | 7.890541  | 0.051910  |
| O  | 5.038841  | -0.665502 | 0.984986  | C | 4.045963  | 6.615182  | 0.738164  |
| O  | 5.534190  | 0.127435  | -1.385433 | H | 3.454726  | 7.436084  | 1.140346  |



|    |           |           |           |    |            |           |           |
|----|-----------|-----------|-----------|----|------------|-----------|-----------|
| C  | -4.279152 | 0.159894  | 4.243860  | H  | -0.688753  | 3.871190  | 2.078234  |
| C  | -3.864451 | 2.352160  | 5.375980  | C  | -2.457369  | 3.364578  | -1.337088 |
| H  | -5.678753 | 1.778544  | 4.376208  | H  | -2.295405  | 1.262037  | -0.941923 |
| H  | -4.778258 | -0.372879 | 3.426901  | C  | -2.179331  | 4.645932  | -0.861365 |
| H  | -4.587036 | -0.296825 | 5.192345  | H  | -1.291543  | 5.842041  | 0.695344  |
| H  | -3.199061 | -0.008081 | 4.134744  | H  | -2.921886  | 3.229609  | -2.310819 |
| H  | -4.076350 | 3.427823  | 5.415754  | C  | -3.314123  | -4.030163 | 3.036637  |
| H  | -2.776215 | 2.234555  | 5.266073  | H  | -3.554098  | -4.328643 | 2.006858  |
| H  | -4.143817 | 1.928639  | 6.346847  | H  | -4.221983  | -3.583804 | 3.463753  |
| P  | -5.110663 | 0.026521  | -1.147951 | C  | -7.157416  | -1.314509 | 1.771363  |
| C  | -4.684722 | 1.026538  | -2.624551 | C  | -7.685779  | -0.340313 | 2.669864  |
| C  | -3.529801 | 0.698244  | -3.348542 | H  | -7.108891  | 0.241302  | 3.383563  |
| C  | -5.424200 | 2.150240  | -3.012703 | C  | -9.081374  | -0.204208 | 2.412006  |
| C  | -3.134388 | 1.458515  | -4.444031 | H  | -9.756144  | 0.488834  | 2.902876  |
| H  | -2.934129 | -0.159161 | -3.032942 | C  | -8.233010  | -1.779611 | 0.950863  |
| C  | -5.022075 | 2.918642  | -4.103794 | H  | -8.150062  | -2.490918 | 0.134995  |
| H  | -6.318929 | 2.433002  | -2.461378 | C  | -9.420043  | -1.094705 | 1.350120  |
| C  | -3.881321 | 2.574660  | -4.823593 | H  | -10.399002 | -1.198507 | 0.894671  |
| H  | -2.236441 | 1.187829  | -4.996851 | H  | -6.112055  | -1.610625 | 1.697019  |
| H  | -5.605726 | 3.791268  | -4.390424 | C  | -0.608332  | -0.786993 | 3.401611  |
| H  | -3.569280 | 3.176317  | -5.674670 | H  | 0.382306   | -0.423328 | 3.105748  |
| C  | -5.673460 | -1.568334 | -1.837601 | H  | -0.484300  | -1.742102 | 3.917739  |
| C  | -5.519651 | -2.723035 | -1.059961 | H  | -0.998536  | -0.056365 | 4.130764  |
| C  | -6.329013 | -1.652571 | -3.072149 | Fe | -7.997823  | 0.222617  | 0.742998  |
| C  | -6.068267 | -3.929003 | -1.487170 | Cl | -2.628231  | 6.025119  | -1.823729 |
| H  | -4.967330 | -2.670530 | -0.119798 | Ir | 2.687866   | -1.335471 | -0.614790 |
| C  | -6.860191 | -2.864695 | -3.503011 | P  | 4.433920   | 0.084401  | -0.194624 |
| H  | -6.425593 | -0.762918 | -3.695853 | O  | 5.332688   | 0.122031  | 1.186693  |
| C  | -6.743399 | -4.000501 | -2.704092 | O  | 5.624736   | -0.092066 | -1.339380 |
| H  | -5.951321 | -4.822394 | -0.875067 | N  | 3.848518   | 1.650209  | -0.155706 |
| H  | -7.371209 | -2.921891 | -4.462690 | C  | 6.377087   | -0.773187 | 1.378952  |
| H  | -7.164864 | -4.946968 | -3.039134 | C  | 6.210178   | -1.729099 | 2.398498  |
| Cu | -3.816541 | 0.067171  | 0.632061  | H  | 5.290687   | -1.709193 | 2.981864  |
| O  | -3.635941 | -1.863728 | 1.609713  | C  | 7.202805   | -2.645928 | 2.633628  |
| C  | -2.576676 | -1.935504 | 2.252575  | H  | 7.090534   | -3.388997 | 3.421976  |
| O  | -2.285296 | -3.018647 | 2.994021  | C  | 8.376413   | -2.657019 | 1.842233  |
| C  | -1.535550 | -0.923884 | 2.234479  | C  | 9.374723   | -3.643863 | 2.023075  |
| N  | -1.894310 | 0.180598  | 1.482161  | H  | 9.229156   | -4.392283 | 2.801406  |
| C  | -1.192934 | 1.282103  | 1.539360  | C  | 10.496761  | -3.669093 | 1.229954  |
| H  | -0.375446 | 1.397538  | 2.262729  | H  | 11.254248  | -4.436097 | 1.376068  |
| C  | -1.490823 | 2.422889  | 0.689940  | C  | 10.658901  | -2.704511 | 0.215159  |
| C  | -1.181265 | 3.725632  | 1.116430  | H  | 11.537227  | -2.738292 | -0.426166 |
| C  | -2.109024 | 2.267862  | -0.562991 | C  | 9.714617   | -1.722523 | 0.023071  |
| C  | -1.525216 | 4.836515  | 0.354925  | H  | 9.851011   | -0.990762 | -0.769653 |

|   |           |           |           |   |           |           |           |
|---|-----------|-----------|-----------|---|-----------|-----------|-----------|
| C | 8.553806  | -1.655794 | 0.832821  | H | 4.031153  | 1.176816  | 5.228336  |
| C | 7.545894  | -0.652340 | 0.645381  | C | 4.173489  | 1.908559  | 3.212676  |
| C | 7.716843  | 0.467232  | -0.306226 | H | 5.201763  | 1.574758  | 3.099224  |
| C | 8.829388  | 1.368636  | -0.228671 | C | 5.667890  | 3.095528  | 0.851279  |
| C | 9.776063  | 1.317580  | 0.824891  | H | 6.060225  | 3.270858  | -0.156759 |
| H | 9.663553  | 0.568916  | 1.605295  | H | 6.275768  | 2.316634  | 1.318688  |
| C | 10.824064 | 2.206550  | 0.882031  | H | 5.800673  | 4.015139  | 1.432272  |
| H | 11.532404 | 2.150141  | 1.706317  | C | 1.930305  | -0.654411 | 1.276867  |
| C | 10.985431 | 3.193109  | -0.111422 | H | 2.141669  | -1.353444 | 2.094868  |
| H | 11.822868 | 3.885630  | -0.058594 | H | 2.180452  | 0.375596  | 1.539209  |
| C | 10.074681 | 3.284304  | -1.136249 | C | 0.752883  | -0.908791 | 0.485019  |
| H | 10.177576 | 4.052061  | -1.902439 | H | 0.334283  | -0.083382 | -0.095854 |
| C | 8.976120  | 2.394860  | -1.217231 | C | -0.144359 | -1.982594 | 0.756521  |
| C | 8.012786  | 2.508618  | -2.248253 | H | 0.163454  | -2.681885 | 1.538389  |
| H | 8.146552  | 3.272747  | -3.012853 | C | 3.543497  | -2.105056 | -2.472414 |
| C | 6.913235  | 1.687383  | -2.274000 | H | 3.886892  | -1.251576 | -3.060038 |
| H | 6.153565  | 1.765749  | -3.048767 | C | 2.143560  | -2.355798 | -2.473425 |
| C | 6.763941  | 0.699535  | -1.283072 | H | 1.521506  | -1.691327 | -3.079887 |
| C | 2.519101  | 1.766146  | -0.792533 | C | 1.554727  | -3.728211 | -2.242548 |
| H | 1.752769  | 1.826982  | 0.006316  | H | 1.712861  | -4.356751 | -3.135542 |
| C | 2.412556  | 3.014694  | -1.639219 | H | 0.468082  | -3.622561 | -2.143457 |
| C | 3.510151  | 3.514174  | -2.345851 | C | 2.107066  | -4.434096 | -0.996510 |
| H | 4.480629  | 3.032296  | -2.222801 | H | 2.919276  | -5.122706 | -1.267318 |
| C | 3.373301  | 4.624723  | -3.172250 | H | 1.321687  | -5.068932 | -0.566316 |
| H | 4.238681  | 5.007578  | -3.711174 | C | 2.608389  | -3.492640 | 0.085219  |
| C | 2.135202  | 5.250190  | -3.306765 | H | 2.047125  | -3.500812 | 1.020323  |
| H | 2.029304  | 6.120287  | -3.951848 | C | 3.933933  | -3.055094 | 0.179998  |
| C | 1.037124  | 4.762258  | -2.602753 | H | 4.287435  | -2.773809 | 1.172618  |
| H | 0.066609  | 5.249149  | -2.694257 | C | 5.018852  | -3.366055 | -0.819147 |
| C | 1.179084  | 3.655286  | -1.770575 | H | 5.861603  | -2.689844 | -0.624946 |
| H | 0.321162  | 3.276624  | -1.213174 | H | 5.403731  | -4.383806 | -0.638266 |
| C | 2.245353  | 0.514768  | -1.625036 | C | 4.575851  | -3.203267 | -2.277474 |
| H | 2.826277  | 0.572013  | -2.560716 | H | 4.176982  | -4.149231 | -2.668821 |
| H | 1.187418  | 0.513792  | -1.922319 | H | 5.456055  | -2.979585 | -2.891459 |
| C | 4.190010  | 2.758636  | 0.795181  | C | -2.789278 | -5.170168 | 3.863721  |
| H | 3.693463  | 3.623231  | 0.330811  | H | -2.548544 | -4.843086 | 4.880349  |
| C | 3.531585  | 2.552821  | 2.148172  | H | -3.540237 | -5.963699 | 3.931623  |
| C | 2.220745  | 3.006206  | 2.344253  | H | -1.881485 | -5.596787 | 3.422261  |
| H | 1.721320  | 3.552461  | 1.540251  | C | -1.045764 | -2.534397 | -0.222052 |
| C | 1.558467  | 2.783744  | 3.550785  | C | -1.505380 | -1.960969 | -1.432624 |
| H | 0.542248  | 3.153308  | 3.695636  | C | -1.530739 | -3.840583 | -0.160165 |
| C | 2.196829  | 2.107363  | 4.586325  | C | -2.235995 | -2.930789 | -2.111634 |
| H | 1.681441  | 1.935142  | 5.529824  | H | -1.271176 | -0.968322 | -1.802633 |
| C | 3.511552  | 1.680434  | 4.415001  | H | -1.366067 | -4.615193 | 0.579830  |

|   |           |           |           |
|---|-----------|-----------|-----------|
| C | -2.892123 | -3.010843 | -3.360883 |
| C | -2.816614 | -5.267509 | -1.718342 |
| C | -3.472660 | -4.181576 | -3.769716 |
| H | -2.917231 | -2.126578 | -3.993535 |
| C | -3.424637 | -5.329314 | -2.934656 |
| H | -2.742024 | -6.100653 | -1.025524 |
| H | -3.973195 | -4.236539 | -4.732865 |
| H | -3.878877 | -6.264758 | -3.248417 |
| N | -2.231791 | -4.094505 | -1.303893 |

**TS3-cis**

M06-L SCF energy in solvent: -8423.343394 a.u

|   |           |           |           |
|---|-----------|-----------|-----------|
| C | -6.659545 | -1.129226 | 1.041922  |
| C | -7.931815 | -1.551976 | 1.560910  |
| H | -8.209663 | -1.548667 | 2.608412  |
| C | -8.717655 | -2.024592 | 0.476284  |
| H | -9.710540 | -2.454071 | 0.554783  |
| C | -6.668438 | -1.352174 | -0.394285 |
| C | -7.951865 | -1.906594 | -0.717013 |
| H | -8.265954 | -2.211641 | -1.710304 |
| C | -3.556735 | -0.345367 | 2.820435  |
| C | -4.671773 | -0.093654 | 3.841490  |
| H | -4.567899 | -0.657752 | 4.773925  |
| N | -4.293790 | -0.603681 | 1.572832  |
| C | -5.543196 | -0.751811 | 1.887205  |
| O | -5.868431 | -0.562819 | 3.185259  |
| H | -4.817546 | 0.968565  | 4.078912  |
| H | -2.940294 | 0.552920  | 2.671696  |
| C | -2.637167 | -1.513830 | 3.199978  |
| C | -1.723790 | -1.922180 | 2.054126  |
| C | -1.831091 | -1.149018 | 4.439974  |
| H | -3.291371 | -2.369155 | 3.447071  |
| H | -2.284116 | -2.232882 | 1.164523  |
| H | -1.072147 | -2.753799 | 2.352609  |
| H | -1.075150 | -1.088618 | 1.741804  |
| H | -2.460003 | -0.820892 | 5.277528  |
| H | -1.119527 | -0.338732 | 4.222854  |
| H | -1.247751 | -2.007074 | 4.791694  |
| P | -5.327154 | -0.920861 | -1.527030 |
| C | -6.035178 | 0.408178  | -2.557725 |
| C | -5.285262 | 0.811452  | -3.672513 |
| C | -7.217418 | 1.088987  | -2.251671 |
| C | -5.718358 | 1.858611  | -4.476325 |
| H | -4.356317 | 0.288405  | -3.910937 |

|    |           |           |           |
|----|-----------|-----------|-----------|
| C  | -7.650297 | 2.138349  | -3.060377 |
| H  | -7.803050 | 0.800895  | -1.378658 |
| C  | -6.906373 | 2.523553  | -4.172531 |
| H  | -5.131245 | 2.154071  | -5.344631 |
| H  | -8.574708 | 2.658694  | -2.814424 |
| H  | -7.250347 | 3.341442  | -4.803126 |
| C  | -5.226788 | -2.322888 | -2.694921 |
| C  | -4.122397 | -3.180397 | -2.622020 |
| C  | -6.217093 | -2.563808 | -3.655981 |
| C  | -4.030118 | -4.282198 | -3.469729 |
| H  | -3.331872 | -2.970683 | -1.897984 |
| C  | -6.122220 | -3.662823 | -4.503044 |
| H  | -7.057311 | -1.875101 | -3.751335 |
| C  | -5.032254 | -4.527453 | -4.405855 |
| H  | -3.169790 | -4.946544 | -3.404460 |
| H  | -6.896502 | -3.842637 | -5.246429 |
| H  | -4.958823 | -5.386207 | -5.070304 |
| Cu | -3.575573 | -0.279492 | -0.327153 |
| O  | -1.689434 | -0.994531 | -1.084138 |
| C  | -1.273496 | -0.186997 | -1.927398 |
| O  | -0.437662 | -0.546752 | -2.902506 |
| C  | -1.603496 | 1.242679  | -1.924458 |
| N  | -2.804566 | 1.468210  | -1.243196 |
| C  | -3.478820 | 2.562324  | -1.460717 |
| H  | -3.203935 | 3.232752  | -2.285175 |
| C  | -4.630922 | 2.966778  | -0.684213 |
| C  | -5.488428 | 3.967180  | -1.168650 |
| C  | -4.900933 | 2.412722  | 0.577931  |
| C  | -6.609818 | 4.360084  | -0.450465 |
| H  | -5.285933 | 4.422926  | -2.138169 |
| C  | -6.023344 | 2.783660  | 1.300884  |
| H  | -4.188757 | 1.709446  | 1.003446  |
| C  | -6.879920 | 3.750821  | 0.773653  |
| H  | -7.281198 | 5.122947  | -0.836732 |
| H  | -6.230090 | 2.349789  | 2.277570  |
| C  | -0.012371 | -1.929775 | -2.900445 |
| H  | -0.898938 | -2.558421 | -3.058084 |
| H  | 0.394034  | -2.168712 | -1.911389 |
| C  | -5.286580 | -4.192890 | 0.447410  |
| C  | -5.711190 | -4.133804 | 1.808215  |
| H  | -5.148544 | -3.706303 | 2.633105  |
| C  | -7.035810 | -4.654243 | 1.881841  |
| H  | -7.653343 | -4.700305 | 2.772154  |
| C  | -6.352130 | -4.752905 | -0.323250 |



|    |           |           |           |   |           |           |           |
|----|-----------|-----------|-----------|---|-----------|-----------|-----------|
| H  | -6.353515 | -4.892383 | -1.399734 | C | 7.457203  | -0.224902 | 2.506734  |
| C  | -7.431033 | -5.038376 | 0.565873  | H | 6.864357  | 0.278039  | 3.268252  |
| H  | -8.401087 | -5.433031 | 0.283153  | C | 7.095415  | -0.055754 | 1.157474  |
| H  | -4.338790 | -3.831506 | 0.061235  | C | 2.800679  | -0.705701 | 2.099053  |
| C  | -1.289502 | 2.041105  | -3.161569 | H | 1.914014  | -1.137807 | 1.595079  |
| H  | -0.336491 | 1.723469  | -3.591683 | C | 2.817574  | -1.190422 | 3.529832  |
| H  | -1.210929 | 3.113719  | -2.940541 | C | 3.983864  | -1.128642 | 4.298839  |
| H  | -2.062582 | 1.926436  | -3.935842 | H | 4.907703  | -0.792301 | 3.825909  |
| Fe | -6.961824 | -3.061732 | 0.618916  | C | 3.971913  | -1.512583 | 5.634793  |
| Cl | -8.289685 | 4.222272  | 1.675314  | H | 4.888037  | -1.464603 | 6.220857  |
| Ir | 2.966219  | 1.658848  | 0.090791  | C | 2.791247  | -1.963478 | 6.223940  |
| P  | 4.576572  | 0.043020  | 0.328062  | H | 2.782130  | -2.266007 | 7.268954  |
| O  | 5.177703  | -0.945595 | -0.852466 | C | 1.627145  | -2.033521 | 5.464726  |
| O  | 5.981335  | 0.725788  | 0.899875  | H | 0.704843  | -2.395705 | 5.917603  |
| N  | 4.010201  | -1.139771 | 1.368920  | C | 1.644401  | -1.654526 | 4.124350  |
| C  | 6.148475  | -0.472626 | -1.725074 | H | 0.735419  | -1.712667 | 3.521986  |
| C  | 5.755180  | -0.293458 | -3.064418 | C | 2.691135  | 0.812509  | 2.048654  |
| H  | 4.727796  | -0.534376 | -3.334756 | H | 3.430641  | 1.246666  | 2.741599  |
| C  | 6.666784  | 0.160722  | -3.982610 | H | 1.702765  | 1.110750  | 2.423709  |
| H  | 6.380355  | 0.296224  | -5.024839 | C | 4.206856  | -2.622608 | 1.314438  |
| C  | 7.989111  | 0.477710  | -3.588422 | H | 3.877144  | -2.943100 | 2.313336  |
| C  | 8.922325  | 1.002726  | -4.513919 | C | 3.263294  | -3.285479 | 0.327285  |
| H  | 8.604474  | 1.142151  | -5.546875 | C | 1.970047  | -3.624338 | 0.746171  |
| C  | 10.195143 | 1.339816  | -4.121949 | H | 1.676705  | -3.413854 | 1.776925  |
| H  | 10.902064 | 1.745567  | -4.842354 | C | 1.076292  | -4.261306 | -0.110921 |
| C  | 10.578503 | 1.174430  | -2.776018 | H | 0.077791  | -4.519758 | 0.239833  |
| H  | 11.577935 | 1.467056  | -2.460167 | C | 1.473838  | -4.592291 | -1.403966 |
| C  | 9.700121  | 0.654723  | -1.853681 | H | 0.786864  | -5.109588 | -2.073530 |
| H  | 10.011141 | 0.547044  | -0.817602 | C | 2.758701  | -4.266278 | -1.832873 |
| C  | 8.387350  | 0.270878  | -2.226857 | H | 3.082721  | -4.535084 | -2.837577 |
| C  | 7.448818  | -0.274437 | -1.288099 | C | 3.642326  | -3.612527 | -0.979265 |
| C  | 7.825913  | -0.588278 | 0.108909  | H | 4.644579  | -3.373409 | -1.328142 |
| C  | 8.913872  | -1.466021 | 0.432878  | C | 5.653045  | -3.065140 | 1.193132  |
| C  | 9.623393  | -2.198959 | -0.551205 | H | 6.258665  | -2.612603 | 1.985671  |
| H  | 9.337906  | -2.099282 | -1.595863 | H | 6.109081  | -2.815424 | 0.231719  |
| C  | 10.653340 | -3.042532 | -0.204717 | H | 5.698333  | -4.153449 | 1.313127  |
| H  | 11.175714 | -3.598658 | -0.980631 | C | 1.815612  | 0.222265  | -1.041504 |
| C  | 11.035782 | -3.196919 | 1.142964  | H | 1.860170  | 0.434683  | -2.113367 |
| H  | 11.859105 | -3.859215 | 1.402120  | H | 2.011528  | -0.829596 | -0.808732 |
| C  | 10.356107 | -2.518657 | 2.125502  | C | 0.854703  | 0.912797  | -0.231387 |
| H  | 10.627482 | -2.640927 | 3.173780  | H | 0.544093  | 0.385214  | 0.674343  |
| C  | 9.279044  | -1.657531 | 1.806418  | C | -0.058620 | 1.959550  | -0.646783 |
| C  | 8.546621  | -0.996480 | 2.821586  | H | 0.293045  | 2.600766  | -1.452659 |
| H  | 8.847749  | -1.129130 | 3.860054  | C | 4.172991  | 3.221896  | 1.005164  |

|                                               |           |           |           |   |           |           |           |
|-----------------------------------------------|-----------|-----------|-----------|---|-----------|-----------|-----------|
| H                                             | 4.613764  | 2.828236  | 1.922864  | C | -5.849002 | -4.297377 | -1.051088 |
| C                                             | 2.799589  | 3.599526  | 1.080846  | H | -6.362981 | -5.223866 | -1.283873 |
| H                                             | 2.307528  | 3.484821  | 2.050874  | C | -5.218823 | -2.336099 | 0.034598  |
| C                                             | 2.184233  | 4.656549  | 0.195095  | C | -6.024036 | -3.519964 | 0.128665  |
| H                                             | 2.490811  | 5.661918  | 0.531656  | H | -6.669559 | -3.770121 | 0.965114  |
| H                                             | 1.096915  | 4.615036  | 0.336772  | C | -2.946423 | 0.573802  | -2.623498 |
| C                                             | 2.504338  | 4.471365  | -1.292932 | C | -2.430527 | -0.565579 | -3.500447 |
| H                                             | 3.359218  | 5.092833  | -1.592096 | H | -2.554829 | -0.411796 | -4.576202 |
| H                                             | 1.660485  | 4.839563  | -1.893606 | N | -3.533737 | -0.153159 | -1.485924 |
| C                                             | 2.779649  | 3.029031  | -1.684396 | C | -3.770758 | -1.358015 | -1.903641 |
| H                                             | 2.058898  | 2.580746  | -2.372278 | O | -3.274209 | -1.681954 | -3.120902 |
| C                                             | 4.062130  | 2.460260  | -1.715527 | H | -1.388876 | -0.845825 | -3.287234 |
| H                                             | 4.215520  | 1.637627  | -2.415958 | H | -2.132380 | 1.217154  | -2.256161 |
| C                                             | 5.320423  | 3.161535  | -1.271220 | C | -3.994767 | 1.436813  | -3.354144 |
| H                                             | 6.116426  | 2.410643  | -1.180162 | C | -4.884983 | 2.231706  | -2.411003 |
| H                                             | 5.652550  | 3.854863  | -2.062220 | C | -3.310006 | 2.338491  | -4.373897 |
| C                                             | 5.164478  | 3.892606  | 0.066572  | H | -4.638708 | 0.728616  | -3.905217 |
| H                                             | 4.863985  | 4.937343  | -0.095069 | H | -5.353959 | 1.583458  | -1.661989 |
| H                                             | 6.142487  | 3.943484  | 0.559485  | H | -5.676662 | 2.743227  | -2.971653 |
| C                                             | 1.002751  | -2.085749 | -3.997701 | H | -4.325078 | 2.992241  | -1.851538 |
| H                                             | 1.906420  | -1.502404 | -3.785541 | H | -2.706399 | 1.774405  | -5.096541 |
| H                                             | 1.296601  | -3.136550 | -4.084638 | H | -2.635156 | 3.052886  | -3.879133 |
| H                                             | 0.598227  | -1.761311 | -4.962242 | H | -4.043947 | 2.918105  | -4.945066 |
| C                                             | -0.817806 | 2.649585  | 0.379527  | P | -4.951828 | -1.091899 | 1.330463  |
| C                                             | -1.147324 | 2.171217  | 1.669078  | C | -4.377974 | -2.084631 | 2.757818  |
| C                                             | -1.464569 | 3.874940  | 0.211383  | C | -4.242888 | -1.419824 | 3.986829  |
| C                                             | -1.990605 | 3.098253  | 2.270965  | C | -4.047656 | -3.441623 | 2.684486  |
| H                                             | -0.795683 | 1.255486  | 2.131486  | C | -3.823113 | -2.105793 | 5.119981  |
| H                                             | -1.454127 | 4.571310  | -0.619256 | H | -4.483498 | -0.357483 | 4.054116  |
| C                                             | -2.660170 | 3.188090  | 3.510808  | C | -3.629172 | -4.126788 | 3.823702  |
| C                                             | -3.026435 | 5.197846  | 1.607810  | H | -4.107031 | -3.971714 | 1.735059  |
| C                                             | -3.496763 | 4.242439  | 3.774079  | C | -3.520927 | -3.465647 | 5.042582  |
| H                                             | -2.487631 | 2.403586  | 4.246563  | H | -3.738156 | -1.580138 | 6.069582  |
| C                                             | -3.684671 | 5.258252  | 2.799248  | H | -3.381247 | -5.185177 | 3.750046  |
| H                                             | -3.126810 | 5.934699  | 0.816398  | H | -3.201411 | -4.005769 | 5.931876  |
| H                                             | -4.013251 | 4.309847  | 4.728326  | C | -6.629019 | -0.588950 | 1.861787  |
| H                                             | -4.356456 | 6.090611  | 2.985854  | C | -7.079437 | 0.689312  | 1.513761  |
| N                                             | -2.180674 | 4.148190  | 1.343512  | C | -7.469495 | -1.433019 | 2.599017  |
| <b>TS3-trans</b>                              |           |           |           | C | -8.362428 | 1.104007  | 1.862404  |
| M06-L SCF energy in solvent: -8423.346636 a.u |           |           |           | H | -6.410492 | 1.359853  | 0.968751  |
| C                                             | -4.545172 | -2.396240 | -1.253560 | C | -8.748992 | -1.015454 | 2.951911  |
| C                                             | -4.946142 | -3.611821 | -1.907404 | H | -7.109525 | -2.412337 | 2.916772  |
| H                                             | -4.643919 | -3.911763 | -2.904496 | C | -9.198985 | 0.250190  | 2.577441  |
|                                               |           |           |           | H | -8.705589 | 2.099119  | 1.585199  |

|    |            |           |           |   |           |           |           |
|----|------------|-----------|-----------|---|-----------|-----------|-----------|
| H  | -9.394623  | -1.675279 | 3.528512  | C | 3.763279  | -2.383614 | -0.110865 |
| H  | -10.198895 | 0.576042  | 2.857449  | C | 2.486504  | -2.967745 | -0.015796 |
| Cu | -3.589365  | 0.413611  | 0.512933  | H | 1.748309  | -2.504495 | 0.639687  |
| O  | -3.675049  | 2.530573  | 0.604366  | C | 2.214119  | -4.101156 | -0.737826 |
| C  | -2.769919  | 2.989045  | 1.326401  | H | 1.237643  | -4.579946 | -0.666664 |
| O  | -2.735450  | 4.275550  | 1.680152  | C | 3.188799  | -4.655027 | -1.603102 |
| C  | -1.629618  | 2.211937  | 1.790895  | C | 2.891728  | -5.781237 | -2.406997 |
| N  | -1.830353  | 0.843203  | 1.615374  | H | 1.900738  | -6.227295 | -2.324549 |
| C  | -1.132358  | -0.027092 | 2.287356  | C | 3.822793  | -6.295400 | -3.276889 |
| H  | -0.497157  | 0.280005  | 3.129208  | H | 3.580596  | -7.159208 | -3.892348 |
| C  | -1.095113  | -1.432558 | 1.930656  | C | 5.092115  | -5.691453 | -3.379806 |
| C  | -0.685584  | -2.391057 | 2.868961  | H | 5.820270  | -6.083962 | -4.086698 |
| C  | -1.379896  | -1.863145 | 0.621033  | C | 5.420593  | -4.607841 | -2.597611 |
| C  | -0.608460  | -3.735850 | 2.535648  | H | 6.402957  | -4.151347 | -2.693898 |
| H  | -0.447947  | -2.075097 | 3.883906  | C | 4.493648  | -4.064153 | -1.673990 |
| C  | -1.315848  | -3.204888 | 0.273531  | C | 4.801925  | -2.932815 | -0.845529 |
| H  | -1.625485  | -1.120150 | -0.137703 | C | 6.161749  | -2.351491 | -0.749485 |
| C  | -0.943699  | -4.136177 | 1.243641  | C | 7.303758  | -3.150270 | -0.400191 |
| H  | -0.314000  | -4.477046 | 3.274750  | C | 7.198945  | -4.513239 | -0.023594 |
| H  | -1.535277  | -3.530260 | -0.742359 | H | 6.218230  | -4.980366 | 0.018365  |
| C  | -3.772543  | 5.121980  | 1.134481  | C | 8.313564  | -5.249832 | 0.305445  |
| H  | -4.725028  | 4.839639  | 1.600055  | H | 8.200487  | -6.292297 | 0.597023  |
| H  | -3.856140  | 4.918273  | 0.060078  | C | 9.596505  | -4.667843 | 0.277347  |
| C  | -7.558047  | -0.667657 | -1.607466 | H | 10.470129 | -5.263576 | 0.532505  |
| C  | -7.052427  | -1.037242 | -2.887662 | C | 9.732968  | -3.341502 | -0.052480 |
| H  | -6.342793  | -0.468128 | -3.481476 | H | 10.714707 | -2.868658 | -0.056420 |
| C  | -7.592351  | -2.311579 | -3.227180 | C | 8.606235  | -2.550695 | -0.380815 |
| H  | -7.364994  | -2.883234 | -4.120378 | C | 8.743753  | -1.172396 | -0.669924 |
| C  | -8.411086  | -1.717099 | -1.149114 | H | 9.739245  | -0.730047 | -0.667350 |
| H  | -8.914726  | -1.750020 | -0.187995 | C | 7.640858  | -0.398548 | -0.921068 |
| C  | -8.434061  | -2.731372 | -2.153361 | H | 7.717841  | 0.667519  | -1.123071 |
| H  | -8.959033  | -3.678580 | -2.091153 | C | 6.365402  | -0.992824 | -0.937228 |
| H  | -7.311615  | 0.234369  | -1.058050 | C | 4.167038  | 2.443068  | 1.261271  |
| C  | -0.798699  | 2.732555  | 2.921674  | H | 3.288526  | 2.410650  | 1.932300  |
| H  | -0.689231  | 3.817886  | 2.849511  | C | 5.133083  | 3.456556  | 1.824041  |
| H  | 0.204307   | 2.285715  | 2.922937  | C | 6.484964  | 3.459938  | 1.468235  |
| H  | -1.253903  | 2.505845  | 3.897955  | H | 6.861158  | 2.670750  | 0.815432  |
| Fe | -6.541629  | -2.430581 | -1.489492 | C | 7.338755  | 4.444484  | 1.954491  |
| Cl | -0.904996  | -5.828623 | 0.836334  | H | 8.390751  | 4.434671  | 1.675317  |
| Ir | 2.428641   | 1.404837  | -1.069127 | C | 6.852002  | 5.440812  | 2.799209  |
| P  | 4.136289   | 0.211761  | -0.101678 | H | 7.522674  | 6.207589  | 3.181732  |
| O  | 3.982505   | -1.245968 | 0.650664  | C | 5.506621  | 5.446601  | 3.157359  |
| O  | 5.298745   | -0.152970 | -1.224597 | H | 5.121179  | 6.217499  | 3.822273  |
| N  | 4.746064   | 1.082660  | 1.198021  | C | 4.655594  | 4.456403  | 2.673781  |



|    |           |           |           |   |           |           |           |
|----|-----------|-----------|-----------|---|-----------|-----------|-----------|
| H  | 3.502779  | -1.044335 | -2.347531 | C | 2.824229  | -0.969129 | -1.054931 |
| H  | 2.906265  | -2.585378 | -2.965770 | O | 2.351376  | -2.177739 | -1.397057 |
| C  | 0.337054  | -3.315175 | 0.511099  | C | 2.479680  | -0.632167 | 0.407796  |
| H  | -0.185757 | -3.448228 | 1.465535  | N | 1.114009  | -1.045957 | 0.696820  |
| H  | 1.312705  | -3.804255 | 0.587521  | C | 0.128448  | -0.500549 | -0.047649 |
| H  | -0.233904 | -3.825194 | -0.273996 | H | 0.413152  | -0.285715 | -1.083055 |
| Cl | -6.855621 | 1.606582  | -0.609374 | C | -1.288552 | -0.836813 | 0.101180  |
| C  | 0.743322  | -1.827978 | 3.687932  | C | -1.844291 | -1.372819 | 1.273628  |
| H  | 1.557182  | -2.553298 | 3.726016  | C | -2.130861 | -0.561500 | -0.988035 |
| H  | 0.126121  | -1.743944 | 4.579833  | C | -3.207439 | -1.622116 | 1.346344  |
| C  | 0.531262  | -1.077896 | 2.608164  | H | -1.216073 | -1.549279 | 2.147685  |
| H  | -0.289634 | -0.357117 | 2.599292  | C | -3.494179 | -0.815257 | -0.926305 |
| C  | 1.348206  | -1.144430 | 1.351574  | H | -1.707356 | -0.141203 | -1.901845 |
| H  | 2.210898  | -1.802250 | 1.526841  | C | -4.021458 | -1.342481 | 0.249271  |
| C  | 4.720228  | -2.756910 | -1.778698 | H | -3.641633 | -2.031063 | 2.254584  |
| H  | 4.589653  | -3.815723 | -1.530553 | H | -4.142310 | -0.605042 | -1.772950 |
| H  | 5.401271  | -2.689663 | -2.633782 | C | 2.688447  | -2.610247 | -2.734598 |
| H  | 5.199224  | -2.266282 | -0.924011 | H | 3.779781  | -2.593285 | -2.839120 |
| C  | 1.860150  | 0.209590  | 0.953220  | H | 2.285309  | -1.878561 | -3.445852 |
| C  | 1.123543  | 1.400984  | 0.798505  | C | 3.418937  | -1.417787 | 1.318408  |
| C  | 3.190139  | 0.490205  | 0.673507  | H | 3.142598  | -1.247648 | 2.365413  |
| C  | 2.008906  | 2.405276  | 0.425502  | H | 4.452984  | -1.085093 | 1.180742  |
| H  | 0.054276  | 1.519890  | 0.921882  | H | 3.350716  | -2.488274 | 1.102109  |
| H  | 4.064353  | -0.149059 | 0.686778  | C | 1.529503  | 1.662179  | 0.040655  |
| C  | 1.900650  | 3.778865  | 0.126946  | C | 0.218071  | 1.464505  | 0.572704  |
| C  | 4.402480  | 2.552246  | 0.013324  | C | 0.068977  | 2.758105  | -1.296076 |
| C  | 3.009656  | 4.510099  | -0.213976 | C | -0.653992 | 3.467447  | -2.267985 |
| H  | 0.915617  | 4.237657  | 0.177561  | C | -1.988970 | 2.386246  | -0.067568 |
| C  | 4.281475  | 3.879991  | -0.269449 | C | -2.014485 | 3.633782  | -2.126033 |
| H  | 5.340792  | 2.005274  | -0.008442 | H | -0.118468 | 3.882614  | -3.117867 |
| H  | 2.921453  | 5.569375  | -0.442016 | C | -2.688487 | 3.092010  | -1.008775 |
| H  | 5.171101  | 4.442634  | -0.536838 | H | -2.425992 | 1.933020  | 0.817990  |
| N  | 3.294612  | 1.817998  | 0.354168  | H | -2.574150 | 4.188756  | -2.874934 |

#### TS4

M06-L SCF energy in solvent: -2071.549206 a.u

|   |          |           |           |    |           |           |           |
|---|----------|-----------|-----------|----|-----------|-----------|-----------|
| C | 4.097280 | 1.888309  | 2.420659  | H  | -0.041739 | 1.241052  | 1.613815  |
| H | 4.905812 | 2.105857  | 1.720383  | H  | 0.904311  | -1.113996 | 1.721061  |
| H | 4.267078 | 2.161770  | 3.459674  | Cl | 0.348096  | -0.364505 | 3.588453  |
| C | 2.959650 | 1.317740  | 2.029424  | C  | 1.421032  | 2.400206  | -1.127568 |
| H | 2.166253 | 1.095748  | 2.750231  | H  | 2.222260  | 2.640144  | -1.816439 |
| C | 2.700021 | 0.937439  | 0.598019  | C  | 2.105286  | -3.983346 | -2.920648 |
| H | 3.586554 | 1.171288  | -0.004442 | H  | 2.331136  | -4.354728 | -3.925674 |
| O | 3.480046 | -0.266573 | -1.794661 | H  | 2.520530  | -4.689341 | -2.194450 |
|   |          |           |           | H  | 1.017486  | -3.970450 | -2.797046 |

N -0.643070 2.222802 -0.215565

**Int-II**

M06-L SCF energy in solvent: -2071.559056 a.u

C 3.885562 2.366814 2.133588

H 4.668474 2.543439 1.393873

H 4.049527 2.784062 3.124459

C 2.787704 1.669288 1.848340

H 2.010668 1.499196 2.600688

C 2.532536 1.087390 0.480918

H 3.396976 1.317092 -0.159178

O 2.444036 -0.404459 -1.920629

C 2.751330 -0.985190 -0.895188

O 3.446389 -2.128354 -0.872227

C 2.350503 -0.499810 0.502695

N 0.968902 -0.953883 0.693760

C -0.035105 -0.302458 -0.100105

H 0.269889 -0.326727 -1.153873

C -1.410051 -0.900823 0.003918

C -1.991790 -1.255506 1.226451

C -2.155935 -1.056211 -1.169353

C -3.289669 -1.752974 1.269563

H -1.441607 -1.105756 2.157966

C -3.455145 -1.551567 -1.140935

H -1.710615 -0.784977 -2.127838

C -4.010675 -1.896199 0.086818

H -3.742652 -2.026661 2.219152

H -4.029541 -1.674508 -2.055639

C 3.793932 -2.660902 -2.170435

H 4.338089 -1.888262 -2.726709

H 2.865648 -2.861393 -2.718844

C 3.186258 -1.119627 1.610124

H 2.813348 -0.782128 2.583763

H 4.237176 -0.824292 1.525532

H 3.122261 -2.209078 1.567536

C 1.325435 1.727329 -0.093307

C -0.006885 1.244259 0.314979

C -0.188270 2.917128 -1.281562

C -0.897543 3.779314 -2.125467

C -2.257485 2.107820 -0.363183

C -2.278037 3.790859 -2.074972

H -0.348030 4.431979 -2.797902

C -2.968668 2.954448 -1.180100

H -2.701319 1.438345 0.368087

H -2.836783 4.461671 -2.723507

H -4.051485 2.969435 -1.114497

Cl -5.640908 -2.516375 0.143370

H -0.224626 1.258007 1.411776

H 0.726007 -0.880422 1.694315

Cl -0.024041 0.386903 3.473357

C 1.196136 2.682148 -1.058964

H 1.995786 3.175747 -1.599075

C 4.612878 -3.900742 -1.942015

H 4.905747 -4.340517 -2.901212

H 5.523832 -3.672174 -1.379163

H 4.045525 -4.650643 -1.381449

N -0.906568 2.088648 -0.442420

**TS5**

M06-L SCF energy in solvent: -2071.539766 a.u

C 3.570463 1.021661 3.269109

H 4.597562 0.965629 2.906104

H 3.430756 1.405660 4.277040

C 2.540283 0.649787 2.512758

H 1.518783 0.730102 2.892194

C 2.678388 0.143059 1.103179

H 3.741275 0.117358 0.831098

O 3.538256 -1.442152 -1.062460

C 2.593210 -1.845013 -0.420777

O 1.822216 -2.889698 -0.797733

C 2.109410 -1.287195 0.929807

N 0.645835 -1.227514 1.027761

C -0.027916 -0.524438 -0.070736

H 0.208054 -0.980076 -1.058880

C -1.522989 -0.651167 0.111615

C -2.133173 -0.359367 1.334998

C -2.317959 -1.095696 -0.947069

C -3.509129 -0.479232 1.488122

H -1.523108 -0.027160 2.171556

C -3.697819 -1.219926 -0.813622

H -1.847894 -1.342390 -1.901010

C -4.280610 -0.903174 0.409217

H -3.984842 -0.240081 2.435653

H -4.314283 -1.561799 -1.641126

C 2.172189 -3.487379 -2.063815

H 3.152794 -3.968663 -1.961567

H 2.281128 -2.687313 -2.805791

C 2.618713 -2.226035 2.019083

|    |           |           |           |
|----|-----------|-----------|-----------|
| H  | 2.254716  | -1.891512 | 2.995506  |
| H  | 3.714428  | -2.231211 | 2.045143  |
| H  | 2.273379  | -3.251457 | 1.842979  |
| C  | 1.952350  | 1.049303  | 0.157548  |
| C  | 0.557749  | 0.879589  | -0.084228 |
| C  | 1.346862  | 2.641207  | -1.313889 |
| C  | 1.201466  | 3.732928  | -2.185613 |
| C  | -0.971555 | 2.075835  | -1.662065 |
| C  | -0.007081 | 3.967722  | -2.797911 |
| H  | 2.060056  | 4.377001  | -2.356916 |
| C  | -1.108062 | 3.126013  | -2.527745 |
| H  | -1.783065 | 1.412656  | -1.381367 |
| H  | -0.122236 | 4.809061  | -3.476883 |
| H  | -2.076589 | 3.305378  | -2.983947 |
| Cl | -6.008600 | -1.047077 | 0.597713  |
| H  | -0.016453 | 1.667973  | 1.102342  |
| H  | 0.281076  | -2.177095 | 1.055075  |
| Cl | -0.596738 | 2.592673  | 2.074557  |
| C  | 2.412440  | 2.147532  | -0.540816 |
| H  | 3.407583  | 2.575365  | -0.507883 |
| N  | 0.238898  | 1.819576  | -1.087959 |
| C  | 1.082536  | -4.461451 | -2.417919 |
| H  | 1.299348  | -4.940568 | -3.378483 |
| H  | 0.987585  | -5.245945 | -1.659873 |
| H  | 0.115203  | -3.953043 | -2.502016 |

### 3a

M06-L SCF energy in solvent: -1610.726950 a.u

|   |           |           |           |
|---|-----------|-----------|-----------|
| C | 2.532747  | 0.681939  | 4.072150  |
| H | 3.553617  | 1.042318  | 3.940389  |
| H | 2.142958  | 0.689181  | 5.087936  |
| C | 1.803622  | 0.265636  | 3.038803  |
| H | 0.780718  | -0.089819 | 3.191614  |
| C | 2.272631  | 0.267046  | 1.612606  |
| H | 3.339301  | 0.528351  | 1.583348  |
| O | 3.945930  | -0.480403 | -0.556957 |
| C | 2.936962  | -1.120211 | -0.358060 |
| O | 2.420482  | -1.997417 | -1.250214 |
| C | 2.114812  | -1.118382 | 0.941000  |
| N | 0.684389  | -1.382818 | 0.748943  |
| C | -0.006425 | -0.549011 | -0.249899 |
| H | 0.226754  | -0.876395 | -1.287093 |
| C | -1.499396 | -0.725560 | -0.049987 |
| C | -2.265630 | -1.430063 | -0.976307 |

|    |           |           |           |
|----|-----------|-----------|-----------|
| C  | -2.124618 | -0.207197 | 1.086786  |
| C  | -3.632127 | -1.623521 | -0.783965 |
| H  | -1.786089 | -1.837476 | -1.868473 |
| C  | -3.484533 | -0.386326 | 1.297809  |
| H  | -1.528048 | 0.348912  | 1.810113  |
| C  | -4.227042 | -1.098336 | 0.356848  |
| H  | -4.229060 | -2.174461 | -1.506313 |
| H  | -3.973420 | 0.019304  | 2.180011  |
| C  | 3.152929  | -2.105687 | -2.488221 |
| H  | 4.160898  | -2.477283 | -2.265519 |
| H  | 3.267131  | -1.101063 | -2.912295 |
| C  | 2.681575  | -2.232101 | 1.817992  |
| H  | 2.103165  | -2.306730 | 2.744552  |
| H  | 3.725341  | -2.023453 | 2.077498  |
| H  | 2.641737  | -3.198296 | 1.299830  |
| C  | 1.494249  | 1.255745  | 0.796190  |
| C  | 0.471615  | 0.847287  | -0.047026 |
| C  | 0.685159  | 3.097996  | -0.219164 |
| C  | 0.329796  | 4.351819  | -0.753281 |
| C  | -1.021308 | 2.069066  | -1.621710 |
| C  | -0.667406 | 4.456930  | -1.689804 |
| H  | 0.871246  | 5.228148  | -0.403695 |
| C  | -1.349656 | 3.292061  | -2.127215 |
| H  | -1.508292 | 1.142029  | -1.909155 |
| H  | -0.937189 | 5.427318  | -2.099234 |
| H  | -2.140869 | 3.355402  | -2.868606 |
| Cl | -5.936845 | -1.333435 | 0.618720  |
| H  | 0.554940  | -2.356968 | 0.487546  |
| C  | 1.625732  | 2.650415  | 0.702683  |
| H  | 2.332249  | 3.275725  | 1.235840  |
| N  | -0.026207 | 1.960182  | -0.680235 |
| C  | 2.382361  | -3.031853 | -3.388867 |
| H  | 1.380586  | -2.637829 | -3.594223 |
| H  | 2.902284  | -3.150457 | -4.345386 |
| H  | 2.271548  | -4.023188 | -2.936649 |

### TS4'

M06-L SCF energy in solvent: -2071.548760 a.u

|   |           |          |           |
|---|-----------|----------|-----------|
| C | -4.327891 | 1.520813 | 1.490815  |
| H | -4.212086 | 0.853946 | 2.345208  |
| H | -5.232957 | 2.123285 | 1.456195  |
| C | -3.398548 | 1.592568 | 0.540267  |
| H | -3.540619 | 2.271757 | -0.305522 |
| C | -2.132343 | 0.797167 | 0.564342  |

|    |           |           |           |
|----|-----------|-----------|-----------|
| H  | -2.071777 | 0.188514  | 1.481950  |
| O  | -2.974686 | -2.374386 | 0.207480  |
| C  | -3.151671 | -1.332783 | -0.377483 |
| O  | -4.335851 | -0.917271 | -0.855022 |
| C  | -2.054843 | -0.295682 | -0.630182 |
| N  | -0.793286 | -1.010193 | -0.507579 |
| C  | 0.349624  | -0.338263 | -0.749207 |
| H  | 0.279240  | 0.416975  | -1.534382 |
| C  | 1.676419  | -0.936578 | -0.621617 |
| C  | 1.956378  | -2.030684 | 0.213275  |
| C  | 2.724481  | -0.338692 | -1.339557 |
| C  | 3.255462  | -2.506257 | 0.322021  |
| H  | 1.167591  | -2.471813 | 0.823663  |
| C  | 4.025374  | -0.812988 | -1.241421 |
| H  | 2.512738  | 0.513284  | -1.987216 |
| C  | 4.278075  | -1.896170 | -0.404087 |
| H  | 3.479835  | -3.346488 | 0.973390  |
| H  | 4.834897  | -0.350905 | -1.799917 |
| C  | -5.452168 | -1.770509 | -0.516786 |
| H  | -5.256207 | -2.773040 | -0.914400 |
| H  | -5.495646 | -1.857208 | 0.575625  |
| C  | -2.204938 | 0.369781  | -1.991799 |
| H  | -1.528724 | 1.224813  | -2.104501 |
| H  | -1.998857 | -0.346931 | -2.794137 |
| H  | -3.225542 | 0.735966  | -2.118040 |
| C  | -0.906335 | 1.630256  | 0.478808  |
| C  | 0.357776  | 1.065734  | 0.809537  |
| C  | 0.685792  | 3.151635  | -0.046566 |
| C  | 1.502957  | 4.215035  | -0.463822 |
| C  | 2.655828  | 1.981643  | 0.752903  |
| C  | 2.864764  | 4.151101  | -0.269887 |
| H  | 1.038403  | 5.079908  | -0.930639 |
| C  | 3.447496  | 3.022652  | 0.351658  |
| H  | 3.015000  | 1.081479  | 1.243408  |
| H  | 3.497232  | 4.976598  | -0.587158 |
| H  | 4.518010  | 2.967555  | 0.523197  |
| Cl | 5.905829  | -2.497601 | -0.260714 |
| H  | 0.514696  | 0.299944  | 1.583234  |
| H  | -0.781318 | -1.631296 | 0.328677  |
| Cl | -0.421591 | -1.582642 | 2.540985  |
| C  | -6.688302 | -1.143040 | -1.098724 |
| H  | -6.848655 | -0.139317 | -0.690750 |
| H  | -7.566743 | -1.751931 | -0.861250 |
| H  | -6.615496 | -1.061098 | -2.188415 |

|   |           |          |           |
|---|-----------|----------|-----------|
| C | -0.695676 | 2.885238 | -0.085199 |
| H | -1.441037 | 3.562899 | -0.485450 |
| N | 1.308143  | 2.044282 | 0.544610  |

### Int-II'

M06-L SCF energy in solvent: -2071.562234 a.u

|   |           |           |           |
|---|-----------|-----------|-----------|
| C | -4.469585 | 1.444531  | 1.184601  |
| H | -4.339482 | 0.871718  | 2.103135  |
| H | -5.421506 | 1.954814  | 1.053783  |
| C | -3.502676 | 1.510499  | 0.270509  |
| H | -3.660647 | 2.090963  | -0.643693 |
| C | -2.192543 | 0.810227  | 0.409424  |
| H | -2.103891 | 0.332483  | 1.404295  |
| O | -2.851978 | -2.300300 | 0.638696  |
| C | -3.038397 | -1.463601 | -0.213262 |
| O | -4.199174 | -1.292776 | -0.868833 |
| C | -1.994945 | -0.422438 | -0.618682 |
| N | -0.699898 | -1.047695 | -0.416653 |
| C | 0.431555  | -0.181841 | -0.599881 |
| H | 0.366132  | 0.268711  | -1.601417 |
| C | 1.757360  | -0.884971 | -0.495412 |
| C | 2.115962  | -1.611056 | 0.646406  |
| C | 2.679208  | -0.760891 | -1.537911 |
| C | 3.374920  | -2.194071 | 0.741239  |
| H | 1.416973  | -1.690977 | 1.484429  |
| C | 3.942584  | -1.338308 | -1.455967 |
| H | 2.407856  | -0.198162 | -2.432227 |
| C | 4.278737  | -2.049232 | -0.308443 |
| H | 3.656279  | -2.755119 | 1.628507  |
| H | 4.658836  | -1.239815 | -2.267584 |
| C | -5.275363 | -2.141603 | -0.414032 |
| H | -5.006874 | -3.183726 | -0.624199 |
| H | -5.355630 | -2.042333 | 0.675068  |
| C | -2.165572 | 0.051708  | -2.056544 |
| H | -1.518849 | 0.909696  | -2.277085 |
| H | -1.914458 | -0.756339 | -2.751739 |
| H | -3.197293 | 0.356530  | -2.244206 |
| C | -1.005470 | 1.667947  | 0.249526  |
| C | 0.310461  | 1.033152  | 0.424974  |
| C | 0.541780  | 3.266519  | -0.161363 |
| C | 1.273850  | 4.424798  | -0.447168 |
| C | 2.584196  | 2.086849  | 0.302515  |
| C | 2.651824  | 4.394913  | -0.360167 |
| H | 0.741441  | 5.330655  | -0.723706 |



|    |           |           |           |
|----|-----------|-----------|-----------|
| C  | 3.316031  | 3.216235  | 0.026716  |
| H  | 3.011993  | 1.144283  | 0.630347  |
| H  | 3.227471  | 5.291321  | -0.578240 |
| H  | 4.396061  | 3.184159  | 0.125110  |
| Cl | 5.867343  | -2.760087 | -0.179147 |
| H  | 0.409833  | 0.577783  | 1.452877  |
| H  | -0.682432 | -1.491602 | 0.510842  |
| Cl | -0.320677 | -0.734283 | 2.933261  |
| C  | -6.522354 | -1.705256 | -1.131878 |
| H  | -6.757453 | -0.659381 | -0.906012 |
| H  | -7.372859 | -2.321100 | -0.821320 |
| H  | -6.409546 | -1.802531 | -2.216894 |
| C  | -0.849942 | 2.974512  | -0.121799 |
| H  | -1.630605 | 3.699451  | -0.323831 |
| N  | 1.234871  | 2.119934  | 0.183010  |

### TS5'

M06-L SCF energy in solvent: -2071.539063 a.u

|   |           |           |           |
|---|-----------|-----------|-----------|
| C | -4.454628 | 1.073034  | 1.321101  |
| H | -4.231473 | 0.512734  | 2.229801  |
| H | -5.456090 | 1.489345  | 1.235790  |
| C | -3.536907 | 1.240884  | 0.369674  |
| H | -3.786647 | 1.812522  | -0.528917 |
| C | -2.161252 | 0.658522  | 0.427360  |
| H | -1.983503 | 0.267544  | 1.444339  |
| O | -2.621086 | -2.310440 | 1.009788  |
| C | -2.881864 | -1.663195 | 0.017755  |
| O | -4.040175 | -1.737937 | -0.651990 |
| C | -1.952613 | -0.587052 | -0.531988 |
| N | -0.598112 | -1.121602 | -0.397113 |
| C | 0.492969  | -0.205055 | -0.725706 |
| H | 0.443462  | -0.039720 | -1.819057 |
| C | 1.803492  | -0.917100 | -0.452849 |
| C | 2.708680  | -0.525857 | 0.534059  |
| C | 2.107257  | -2.043745 | -1.226352 |
| C | 3.894929  | -1.225676 | 0.739960  |
| H | 2.493859  | 0.325956  | 1.175305  |
| C | 3.283609  | -2.755355 | -1.034690 |
| H | 1.395550  | -2.371232 | -1.983487 |
| C | 4.173984  | -2.333510 | -0.049307 |
| H | 4.591367  | -0.915844 | 1.514342  |
| H | 3.515549  | -3.627716 | -1.640113 |
| C | -5.040865 | -2.585605 | -0.045063 |
| H | -4.699838 | -3.625812 | -0.109292 |

|    |           |           |           |
|----|-----------|-----------|-----------|
| H  | -5.106777 | -2.329095 | 1.019060  |
| C  | -2.231041 | -0.218460 | -1.980690 |
| H  | -1.619516 | 0.639167  | -2.288714 |
| H  | -1.998235 | -1.062376 | -2.638498 |
| H  | -3.280227 | 0.050469  | -2.125673 |
| C  | -1.075431 | 1.624947  | 0.114983  |
| C  | 0.264017  | 1.154794  | -0.069709 |
| C  | 0.195602  | 3.440036  | -0.273695 |
| C  | 0.773069  | 4.705354  | -0.462472 |
| C  | 2.304124  | 2.410735  | -0.821369 |
| C  | 2.092011  | 4.810531  | -0.838832 |
| H  | 0.151880  | 5.585361  | -0.316435 |
| C  | 2.860140  | 3.643151  | -1.036112 |
| H  | 2.839558  | 1.475461  | -0.947603 |
| H  | 2.541659  | 5.788225  | -0.992486 |
| H  | 3.895684  | 3.700013  | -1.356893 |
| Cl | 5.662790  | -3.208968 | 0.194266  |
| H  | 0.469675  | 0.954889  | 1.404037  |
| H  | -0.481806 | -1.481959 | 0.550826  |
| Cl | 0.547427  | 0.737681  | 2.874694  |
| C  | -6.331086 | -2.346787 | -0.779362 |
| H  | -6.236358 | -2.596272 | -1.841487 |
| H  | -7.128818 | -2.964573 | -0.353722 |
| H  | -6.632706 | -1.296413 | -0.701277 |
| C  | -1.100465 | 3.003324  | 0.053593  |
| H  | -1.943828 | 3.652279  | 0.258532  |
| N  | 1.003482  | 2.308525  | -0.420718 |

### 3a'

M06-L SCF energy in solvent: -1610.725967 a.u

|   |           |           |           |
|---|-----------|-----------|-----------|
| C | 4.250556  | 1.200466  | -1.724663 |
| H | 4.114412  | 0.430948  | -2.485980 |
| H | 5.202305  | 1.727569  | -1.728912 |
| C | 3.291712  | 1.479826  | -0.841477 |
| H | 3.455465  | 2.262520  | -0.095616 |
| C | 1.983394  | 0.755314  | -0.758902 |
| H | 1.842700  | 0.199155  | -1.700455 |
| O | 2.675001  | -2.152050 | -1.067259 |
| C | 2.932587  | -1.432414 | -0.123134 |
| O | 4.093479  | -1.453191 | 0.544172  |
| C | 1.974246  | -0.352211 | 0.368906  |
| N | 0.667788  | -1.018533 | 0.446410  |
| C | -0.475588 | -0.145646 | 0.774510  |
| H | -0.480706 | -0.029554 | 1.877147  |

|                                               |           |           |           |   |           |           |           |
|-----------------------------------------------|-----------|-----------|-----------|---|-----------|-----------|-----------|
| C                                             | -1.737537 | -0.897424 | 0.404167  | C | 3.778633  | -2.090984 | 0.101847  |
| C                                             | -2.490803 | -0.576549 | -0.726005 | C | 2.604138  | -2.800444 | 0.415233  |
| C                                             | -2.130343 | -1.986089 | 1.187522  | H | 1.897381  | -2.348377 | 1.111816  |
| C                                             | -3.621664 | -1.314512 | -1.065500 | C | 2.394060  | -4.031946 | -0.150512 |
| H                                             | -2.192933 | 0.265986  | -1.350588 | H | 1.498419  | -4.605897 | 0.087951  |
| C                                             | -3.252793 | -2.737382 | 0.862751  | C | 3.322648  | -4.566187 | -1.076740 |
| H                                             | -1.535499 | -2.252858 | 2.060533  | C | 3.082834  | -5.800631 | -1.727288 |
| C                                             | -3.992004 | -2.389610 | -0.265483 | H | 2.175914  | -6.350999 | -1.473322 |
| H                                             | -4.211722 | -1.059189 | -1.941683 | C | 3.965206  | -6.295513 | -2.657849 |
| H                                             | -3.556586 | -3.584285 | 1.472585  | H | 3.766843  | -7.244080 | -3.152814 |
| C                                             | 5.087352  | -2.361639 | 0.023057  | C | 5.127974  | -5.565252 | -2.977468 |
| H                                             | 4.750301  | -3.388314 | 0.211436  | H | 5.813886  | -5.946278 | -3.731354 |
| H                                             | 5.139632  | -2.231076 | -1.064124 | C | 5.405116  | -4.376081 | -2.343978 |
| C                                             | 2.345900  | 0.216639  | 1.728464  | H | 6.304740  | -3.821620 | -2.601979 |
| H                                             | 1.672380  | 1.038289  | 1.999003  | C | 4.527366  | -3.845407 | -1.366705 |
| H                                             | 2.271758  | -0.560173 | 2.496149  | C | 4.788186  | -2.604612 | -0.695016 |
| H                                             | 3.368591  | 0.602578  | 1.729127  | C | 6.074364  | -1.881006 | -0.818674 |
| C                                             | 0.812589  | 1.654276  | -0.518462 | C | 7.329169  | -2.512110 | -0.516905 |
| C                                             | -0.315271 | 1.201179  | 0.152854  | C | 7.418157  | -3.822528 | 0.015409  |
| C                                             | -0.595560 | 3.405786  | -0.315970 | H | 6.505321  | -4.378722 | 0.214173  |
| C                                             | -1.332422 | 4.605268  | -0.290332 | C | 8.636435  | -4.393697 | 0.302477  |
| C                                             | -2.394737 | 2.327390  | 0.924694  | H | 8.673433  | -5.398529 | 0.718798  |
| C                                             | -2.556101 | 4.661873  | 0.328838  | C | 9.834822  | -3.689860 | 0.069895  |
| H                                             | -0.900380 | 5.481900  | -0.768380 | H | 10.792005 | -4.156678 | 0.292587  |
| C                                             | -3.087863 | 3.501915  | 0.948240  | C | 9.786003  | -2.408372 | -0.421680 |
| H                                             | -2.748439 | 1.402310  | 1.369852  | H | 10.702296 | -1.842350 | -0.587314 |
| H                                             | -3.119893 | 5.591183  | 0.347434  | C | 8.549160  | -1.782782 | -0.709122 |
| H                                             | -4.052051 | 3.529122  | 1.447682  | C | 8.497078  | -0.442575 | -1.160366 |
| Cl                                            | -5.411325 | -3.317818 | -0.679085 | H | 9.430603  | 0.095489  | -1.320600 |
| H                                             | 0.499080  | -1.467746 | -0.453306 | C | 7.292516  | 0.179086  | -1.365145 |
| C                                             | 6.386182  | -2.039042 | 0.708893  | H | 7.224371  | 1.214555  | -1.691618 |
| H                                             | 6.301403  | -2.156960 | 1.794226  | C | 6.099221  | -0.540534 | -1.169312 |
| H                                             | 7.178984  | -2.705610 | 0.353308  | C | 1.108865  | 0.888203  | 0.849928  |
| H                                             | 6.686458  | -1.006331 | 0.500597  | H | 0.500317  | -0.012941 | 0.744813  |
| C                                             | 0.643460  | 3.016568  | -0.818867 | H | 1.812900  | 0.833336  | 1.686943  |
| H                                             | 1.337673  | 3.659488  | -1.347579 | C | 0.526117  | 2.162949  | 0.543464  |
| N                                             | -1.172074 | 2.265961  | 0.299601  | H | 1.005531  | 3.036929  | 0.990457  |
| <b>TS2'-trans</b>                             |           |           |           | C | -0.805756 | 2.392526  | 0.071622  |
| M06-L SCF energy in solvent: -8423.353065 a.u |           |           |           | H | -1.318749 | 1.563067  | -0.418582 |
| Ir                                            | 1.942639  | 1.427205  | -1.075457 | C | 2.731485  | 1.720871  | -3.073060 |
| P                                             | 3.852144  | 0.516782  | -0.199189 | H | 3.727971  | 2.158481  | -2.985150 |
| O                                             | 3.938763  | -0.856767 | 0.709476  | C | 1.632505  | 2.611414  | -2.878906 |
| O                                             | 4.917796  | 0.141588  | -1.414998 | H | 1.875705  | 3.659090  | -2.683510 |
|                                               |           |           |           | C | 0.276092  | 2.400126  | -3.503272 |

|   |           |           |           |    |           |           |           |
|---|-----------|-----------|-----------|----|-----------|-----------|-----------|
| H | 0.309195  | 2.640286  | -4.579985 | C  | -2.224217 | -3.846234 | -1.280557 |
| H | -0.414970 | 3.126850  | -3.057893 | C  | -0.520912 | -3.180929 | -3.376537 |
| C | -0.276790 | 0.985335  | -3.292335 | H  | -1.581383 | -1.315470 | -3.457529 |
| H | -0.072355 | 0.355234  | -4.171091 | C  | -1.244974 | -4.745037 | -1.696919 |
| H | -1.374950 | 1.032208  | -3.218245 | H  | -2.900741 | -4.121892 | -0.469515 |
| C | 0.261083  | 0.285316  | -2.052060 | C  | -0.388711 | -4.414362 | -2.745693 |
| H | -0.481829 | 0.054766  | -1.281519 | H  | 0.127493  | -2.922595 | -4.212241 |
| C | 1.387998  | -0.548823 | -2.040403 | H  | -1.160223 | -5.714949 | -1.206364 |
| H | 1.393322  | -1.337945 | -1.284915 | H  | 0.373104  | -5.117447 | -3.077128 |
| C | 2.300479  | -0.785225 | -3.215284 | C  | -4.071367 | -0.431397 | -2.735061 |
| H | 3.219341  | -1.256253 | -2.843754 | C  | -4.343450 | 0.933681  | -2.582751 |
| H | 1.842212  | -1.524305 | -3.894705 | C  | -4.209060 | -1.014425 | -4.002628 |
| C | 2.658841  | 0.497495  | -3.973188 | C  | -4.756004 | 1.695962  | -3.673690 |
| H | 1.940399  | 0.681745  | -4.784286 | H  | -4.231606 | 1.392491  | -1.599729 |
| H | 3.627799  | 0.360321  | -4.467396 | C  | -4.615202 | -0.248980 | -5.090948 |
| C | -5.441774 | -2.965967 | 0.343269  | H  | -3.976908 | -2.070110 | -4.143102 |
| C | -6.568097 | -3.830716 | 0.132894  | C  | -4.891899 | 1.107650  | -4.928731 |
| H | -7.131855 | -4.318611 | 0.920048  | H  | -4.974566 | 2.755450  | -3.539962 |
| C | -6.835898 | -3.877045 | -1.261085 | H  | -4.714179 | -0.712269 | -6.070663 |
| H | -7.657142 | -4.405644 | -1.732682 | H  | -5.207735 | 1.704361  | -5.782052 |
| C | -5.007668 | -2.471477 | -0.952921 | Cu | -3.251947 | -0.311798 | 0.631379  |
| C | -5.882645 | -3.057548 | -1.927637 | O  | -3.971224 | 1.754957  | 0.530566  |
| H | -5.849993 | -2.863199 | -2.994354 | C  | -3.272137 | 2.479699  | 1.261047  |
| C | -4.251660 | -1.493593 | 3.464811  | O  | -3.602631 | 3.748537  | 1.515193  |
| C | -4.576716 | -2.944302 | 3.820138  | C  | -2.013229 | 2.053721  | 1.851568  |
| H | -5.247898 | -3.067737 | 4.674407  | N  | -1.907654 | 0.662001  | 1.905919  |
| N | -4.328276 | -1.499509 | 1.989944  | C  | -1.122188 | 0.096523  | 2.778672  |
| C | -4.964264 | -2.578157 | 1.658850  | H  | -0.626014 | 0.694462  | 3.553195  |
| O | -5.273697 | -3.437457 | 2.650597  | C  | -0.845057 | -1.327478 | 2.817499  |
| H | -3.687214 | -3.571862 | 3.960893  | C  | -0.399547 | -1.892992 | 4.024907  |
| H | -3.232624 | -1.222669 | 3.771211  | C  | -0.985266 | -2.175070 | 1.703785  |
| C | -5.235315 | -0.493274 | 4.094646  | C  | -0.136299 | -3.250051 | 4.140501  |
| C | -5.117376 | 0.892559  | 3.482781  | H  | -0.270720 | -1.247197 | 4.893330  |
| C | -5.009958 | -0.431482 | 5.600378  | C  | -0.724332 | -3.534273 | 1.804939  |
| H | -6.253546 | -0.878420 | 3.903836  | H  | -1.277019 | -1.758322 | 0.736642  |
| H | -5.315743 | 0.887191  | 2.405749  | C  | -0.303877 | -4.066843 | 3.023106  |
| H | -5.816828 | 1.590547  | 3.958720  | H  | 0.202207  | -3.676121 | 5.081390  |
| H | -4.102959 | 1.291517  | 3.631921  | H  | -0.818155 | -4.177481 | 0.933824  |
| H | -5.096584 | -1.410115 | 6.088128  | C  | -4.784958 | 4.243062  | 0.846724  |
| H | -4.006169 | -0.040754 | 5.820826  | H  | -4.688489 | 4.032966  | -0.227174 |
| H | -5.733889 | 0.236144  | 6.079919  | H  | -5.650922 | 3.678827  | 1.216977  |
| P | -3.578914 | -1.390930 | -1.259178 | C  | -6.908039 | 0.065060  | -0.332270 |
| C | -2.354793 | -2.596255 | -1.901503 | C  | -7.577294 | -0.572214 | 0.754431  |
| C | -1.488522 | -2.275208 | -2.952733 | H  | -7.269480 | -0.535444 | 1.795679  |

|    |           |           |           |                                                |           |           |           |
|----|-----------|-----------|-----------|------------------------------------------------|-----------|-----------|-----------|
| C  | -8.663245 | -1.331164 | 0.228321  | H                                              | 5.987929  | -0.752491 | 1.873828  |
| H  | -9.336604 | -1.961094 | 0.799448  | H                                              | 7.027527  | 0.591833  | 1.376190  |
| C  | -7.582578 | -0.304930 | -1.537859 | H                                              | 6.819479  | 0.217662  | 3.095932  |
| H  | -7.290554 | -0.019687 | -2.544009 | C                                              | -1.198600 | 3.710025  | -0.387987 |
| C  | -8.666962 | -1.166274 | -1.189109 | C                                              | -2.226216 | 3.936234  | -1.302755 |
| H  | -9.349003 | -1.644969 | -1.883646 | C                                              | -0.688000 | 4.968115  | 0.008908  |
| H  | -6.016656 | 0.683248  | -0.250653 | H                                              | -2.833928 | 3.233362  | -1.862284 |
| C  | -1.363176 | 2.912549  | 2.889578  | C                                              | -1.408945 | 5.949406  | -0.660544 |
| H  | -0.286918 | 2.703142  | 2.960460  | H                                              | 0.105854  | 5.156109  | 0.723042  |
| H  | -1.490170 | 3.969304  | 2.639533  | C                                              | -3.229303 | 5.979924  | -2.279313 |
| H  | -1.794205 | 2.752419  | 3.890180  | C                                              | -1.402964 | 7.360661  | -0.679324 |
| Fe | -6.899538 | -1.951364 | -0.573938 | C                                              | -3.209723 | 7.341852  | -2.284835 |
| C  | 3.847780  | 2.901462  | 0.883202  | H                                              | -3.904178 | 5.373872  | -2.876974 |
| C  | 5.159368  | 1.252033  | 2.231452  | C                                              | -2.285707 | 8.049512  | -1.470038 |
| C  | 3.143785  | 3.091400  | -0.450130 | H                                              | -0.682157 | 7.879586  | -0.052100 |
| N  | 4.510139  | 1.579023  | 0.917376  | H                                              | -3.908738 | 7.873846  | -2.923076 |
| Cl | 0.036747  | -5.766011 | 3.139297  | H                                              | -2.279445 | 9.135961  | -1.482031 |
| H  | 5.609791  | 2.213356  | 2.517495  | N                                              | -2.355778 | 5.284848  | -1.477242 |
| H  | 3.084593  | 2.922599  | 1.682748  | C                                              | -4.876220 | 5.715437  | 1.134427  |
| H  | 3.894223  | 3.308339  | -1.227463 | H                                              | -5.744519 | 6.144871  | 0.623748  |
| H  | 2.497114  | 3.976278  | -0.386731 | H                                              | -4.982539 | 5.905067  | 2.207445  |
| C  | 4.116581  | 0.935288  | 3.288615  | H                                              | -3.980624 | 6.238529  | 0.780675  |
| C  | 3.501775  | 1.994498  | 3.969609  |                                                |           |           |           |
| C  | 3.722406  | -0.369867 | 3.602694  |                                                |           |           |           |
| C  | 2.487433  | 1.766215  | 4.896160  | <b>TS2'-cis</b>                                |           |           |           |
| H  | 3.845565  | 3.013540  | 3.782451  | M06-L SCF energy in solvent: -8423.351719 a.u. |           |           |           |
| C  | 2.719321  | -0.603681 | 4.538006  | C                                              | -6.342171 | 1.044502  | -0.059035 |
| H  | 4.204521  | -1.212659 | 3.113640  | C                                              | -7.605802 | 1.482556  | -0.583718 |
| C  | 2.088375  | 0.462465  | 5.177421  | H                                              | -8.574973 | 1.199919  | -0.188266 |
| H  | 2.026813  | 2.605475  | 5.415140  | C                                              | -7.353873 | 2.395479  | -1.641605 |
| H  | 2.436480  | -1.628542 | 4.773849  | H                                              | -8.107582 | 2.937185  | -2.202840 |
| H  | 1.313381  | 0.278185  | 5.921352  | C                                              | -5.289358 | 1.698006  | -0.819862 |
| C  | 4.823166  | 4.026380  | 1.137316  | C                                              | -5.946013 | 2.532624  | -1.787949 |
| C  | 4.420431  | 5.142500  | 1.873384  | H                                              | -5.443814 | 3.172541  | -2.506345 |
| C  | 6.112241  | 4.003441  | 0.596673  | C                                              | -5.585710 | -0.717766 | 3.055638  |
| C  | 5.283407  | 6.219011  | 2.063203  | C                                              | -7.082141 | -0.974378 | 2.812726  |
| H  | 3.414602  | 5.162848  | 2.300297  | H                                              | -7.728470 | -0.551718 | 3.591848  |
| C  | 6.978124  | 5.073922  | 0.790004  | N                                              | -5.165971 | 0.052881  | 1.875069  |
| H  | 6.432829  | 3.125604  | 0.033800  | C                                              | -6.221185 | 0.256937  | 1.153947  |
| C  | 6.565966  | 6.185693  | 1.523079  | O                                              | -7.380598 | -0.279593 | 1.583297  |
| H  | 4.957151  | 7.081042  | 2.642191  | H                                              | -7.341432 | -2.027921 | 2.666223  |
| H  | 7.981995  | 5.041020  | 0.369952  | H                                              | -5.020581 | -1.663966 | 3.069830  |
| H  | 7.246056  | 7.021109  | 1.676878  | C                                              | -5.295193 | 0.020954  | 4.368099  |
| C  | 6.303861  | 0.262198  | 2.130021  | C                                              | -3.827642 | 0.399127  | 4.481069  |
|    |           |           |           | C                                              | -5.719818 | -0.838877 | 5.552055  |

|    |           |           |           |    |           |           |           |
|----|-----------|-----------|-----------|----|-----------|-----------|-----------|
| H  | -3.501463 | 1.045871  | 3.658786  | C  | -7.114062 | -3.059004 | -1.122628 |
| H  | -3.627156 | 0.916713  | 5.427001  | H  | -7.695886 | -4.778848 | 0.036695  |
| H  | -3.195644 | -0.502112 | 4.460865  | H  | -6.279521 | -1.376914 | -2.175795 |
| H  | -6.779850 | -1.119242 | 5.517237  | C  | -5.539379 | 3.745805  | 1.740678  |
| H  | -5.133072 | -1.767882 | 5.583115  | C  | -6.899668 | 3.437480  | 2.043908  |
| H  | -5.553374 | -0.315486 | 6.499858  | H  | -7.244043 | 2.691336  | 2.754004  |
| P  | -3.503676 | 1.400898  | -0.669049 | C  | -7.730759 | 4.217205  | 1.188398  |
| C  | -3.041728 | 0.894487  | -2.366327 | H  | -8.813370 | 4.172699  | 1.139711  |
| C  | -1.690853 | 0.983754  | -2.728067 | C  | -5.531965 | 4.724681  | 0.699730  |
| C  | -3.953451 | 0.372140  | -3.289608 | H  | -4.649745 | 5.145183  | 0.225789  |
| C  | -1.261196 | 0.588378  | -3.989578 | C  | -6.886047 | 5.011984  | 0.358951  |
| H  | -0.969488 | 1.387986  | -2.016211 | H  | -7.217198 | 5.683466  | -0.425992 |
| C  | -3.521299 | -0.034761 | -4.551472 | H  | -4.666697 | 3.275537  | 2.185362  |
| H  | -5.010749 | 0.307243  | -3.034192 | C  | -1.510456 | -3.337836 | 3.111490  |
| C  | -2.178434 | 0.073866  | -4.905673 | H  | -1.517074 | -4.262766 | 2.520696  |
| H  | -0.208960 | 0.693809  | -4.254797 | H  | -0.567169 | -3.291267 | 3.659106  |
| H  | -4.243776 | -0.428199 | -5.265046 | H  | -2.323211 | -3.423796 | 3.850615  |
| H  | -1.848136 | -0.234978 | -5.895387 | Fe | -6.484428 | 3.029821  | 0.100594  |
| C  | -2.771355 | 3.073397  | -0.562110 | C  | 0.383021  | 0.240378  | 4.144022  |
| C  | -2.178834 | 3.476419  | 0.639952  | H  | -0.407504 | 0.892521  | 4.539201  |
| C  | -2.835040 | 3.977336  | -1.631172 | H  | 0.835517  | 0.754085  | 3.289181  |
| C  | -1.688205 | 4.774798  | 0.779596  | H  | -5.898524 | 0.946010  | 4.362024  |
| H  | -2.099613 | 2.761404  | 1.462335  | Cl | -8.555754 | -3.079755 | -2.091136 |
| C  | -2.356927 | 5.275156  | -1.484058 | Ir | 2.523656  | -1.513992 | -0.627454 |
| H  | -3.245811 | 3.657413  | -2.588828 | P  | 4.040923  | 0.191897  | -0.410343 |
| C  | -1.783288 | 5.676439  | -0.277375 | O  | 4.830092  | 0.648003  | 0.967465  |
| H  | -1.226570 | 5.086378  | 1.715205  | O  | 5.332180  | -0.049943 | -1.432026 |
| H  | -2.426316 | 5.975802  | -2.314830 | C  | 5.839473  | -0.158466 | 1.470650  |
| H  | -1.402923 | 6.689737  | -0.164853 | C  | 5.570094  | -0.829097 | 2.678470  |
| Cu | -3.231050 | 0.030715  | 1.007685  | H  | 4.602046  | -0.667108 | 3.150999  |
| O  | -1.479265 | 0.254470  | 2.261595  | C  | 6.523320  | -1.654469 | 3.217596  |
| C  | -1.152562 | -0.850850 | 2.716953  | H  | 6.336571  | -2.176468 | 4.155339  |
| O  | -0.230318 | -0.982751 | 3.675365  | C  | 7.751663  | -1.868872 | 2.546285  |
| C  | -1.682877 | -2.126800 | 2.242148  | C  | 8.706809  | -2.787793 | 3.042456  |
| N  | -2.848092 | -1.965167 | 1.498788  | H  | 8.484650  | -3.315907 | 3.969443  |
| C  | -3.642306 | -2.984350 | 1.318376  | C  | 9.879335  | -3.024340 | 2.366637  |
| H  | -3.473776 | -3.914386 | 1.874220  | H  | 10.601938 | -3.738560 | 2.755427  |
| C  | -4.805034 | -2.989638 | 0.454975  | C  | 10.138504 | -2.348869 | 1.157056  |
| C  | -5.785377 | -3.979137 | 0.646936  | H  | 11.056110 | -2.555548 | 0.609727  |
| C  | -4.994371 | -2.067624 | -0.589669 | C  | 9.240053  | -1.434263 | 0.657087  |
| C  | -6.937840 | -4.017255 | -0.125608 | H  | 9.451101  | -0.925795 | -0.281052 |
| H  | -5.641808 | -4.725413 | 1.429393  | C  | 8.028930  | -1.152660 | 1.336076  |
| C  | -6.139306 | -2.092730 | -1.368425 | C  | 7.065591  | -0.217028 | 0.830327  |
| H  | -4.205880 | -1.347481 | -0.811292 | C  | 7.344184  | 0.670496  | -0.321105 |

|   |           |           |           |   |           |           |           |
|---|-----------|-----------|-----------|---|-----------|-----------|-----------|
| C | 8.481539  | 1.548015  | -0.327914 | C | 1.793041  | 0.057973  | -1.885774 |
| C | 9.338898  | 1.697359  | 0.791256  | N | 3.263678  | 1.639829  | -0.708248 |
| H | 9.131019  | 1.136899  | 1.698911  | H | 2.896901  | 3.646828  | -0.682768 |
| C | 10.418070 | 2.549555  | 0.754164  | H | 2.321979  | 0.002194  | -2.850578 |
| H | 11.054079 | 2.647844  | 1.631718  | H | 0.736586  | -0.138991 | -2.106192 |
| C | 10.704360 | 3.299538  | -0.403754 | H | 1.159318  | 1.624410  | -0.545251 |
| H | 11.566826 | 3.962283  | -0.423453 | C | 4.943524  | 3.449614  | -0.221903 |
| C | 9.879152  | 3.201648  | -1.497263 | H | 5.668503  | 2.826034  | 0.309657  |
| H | 10.073594 | 3.790723  | -2.393117 | H | 5.225419  | 3.463916  | -1.280085 |
| C | 8.749994  | 2.347545  | -1.486689 | H | 5.028123  | 4.470151  | 0.168452  |
| C | 7.871200  | 2.283433  | -2.593340 | C | 2.955159  | 3.053391  | 1.339479  |
| H | 8.092552  | 2.880959  | -3.476736 | C | 1.594320  | 3.334691  | 1.518442  |
| C | 6.742934  | 1.505668  | -2.546362 | C | 3.751246  | 2.897101  | 2.479424  |
| H | 6.041240  | 1.461616  | -3.376210 | C | 1.042304  | 3.437052  | 2.792907  |
| C | 6.478878  | 0.727464  | -1.403259 | H | 0.964163  | 3.508441  | 0.643737  |
| C | 1.607257  | -0.758359 | 1.166405  | C | 3.204639  | 3.006899  | 3.754681  |
| H | 1.925422  | -1.304102 | 2.060872  | H | 4.815139  | 2.698551  | 2.369024  |
| H | 1.673350  | 0.327599  | 1.281448  | C | 1.847737  | 3.278163  | 3.916899  |
| C | 0.521690  | -1.294036 | 0.390740  | H | -0.020788 | 3.646137  | 2.910651  |
| H | -0.063281 | -0.583204 | -0.201284 | H | 3.847303  | 2.895954  | 4.627092  |
| C | -0.175956 | -2.519273 | 0.705725  | H | 1.420999  | 3.374150  | 4.914881  |
| H | 0.332973  | -3.194984 | 1.393789  | C | 1.721724  | 2.515722  | -2.406871 |
| C | 3.504264  | -2.382121 | -2.379887 | C | 2.588654  | 2.568732  | -3.505102 |
| H | 3.732440  | -1.572962 | -3.076495 | C | 0.676889  | 3.437874  | -2.332818 |
| C | 2.153513  | -2.828533 | -2.333038 | C | 2.396103  | 3.500230  | -4.517638 |
| H | 1.441503  | -2.346959 | -3.010145 | H | 3.425019  | 1.869185  | -3.550605 |
| C | 1.779901  | -4.234654 | -1.930762 | C | 0.476962  | 4.369319  | -3.350484 |
| H | 2.066425  | -4.940659 | -2.728866 | H | 0.008546  | 3.425310  | -1.467744 |
| H | 0.687600  | -4.288052 | -1.865536 | C | 1.332562  | 4.400487  | -4.445965 |
| C | 2.388092  | -4.679568 | -0.590560 | H | 3.076235  | 3.527661  | -5.367307 |
| H | 3.271845  | -5.312054 | -0.756457 | H | -0.345798 | 5.078172  | -3.277443 |
| H | 1.667670  | -5.323678 | -0.068407 | H | 1.180610  | 5.130214  | -5.238881 |
| C | 2.771967  | -3.542626 | 0.343012  | C | 1.397929  | -0.138307 | 5.185598  |
| H | 2.245570  | -3.514524 | 1.297613  | H | 1.893390  | 0.761996  | 5.563784  |
| C | 4.024678  | -2.918298 | 0.350194  | H | 0.933620  | -0.657459 | 6.030650  |
| H | 4.340815  | -2.477853 | 1.296244  | H | 2.168268  | -0.793834 | 4.763574  |
| C | 5.140606  | -3.218148 | -0.616247 | C | -1.021203 | -3.154767 | -0.275129 |
| H | 5.897944  | -2.429848 | -0.523766 | C | -1.610943 | -2.553029 | -1.412041 |
| H | 5.643294  | -4.150850 | -0.308971 | C | -1.487626 | -4.471279 | -0.204369 |
| C | 4.673366  | -3.303307 | -2.071565 | C | -2.411856 | -3.504038 | -2.030638 |
| H | 4.398058  | -4.336132 | -2.328402 | H | -1.470782 | -1.533877 | -1.758862 |
| H | 5.512487  | -3.050838 | -2.730647 | H | -1.233231 | -5.278574 | 0.472568  |
| C | 1.928722  | 1.472494  | -1.329908 | C | -3.258477 | -3.510993 | -3.160338 |
| C | 3.512334  | 2.970186  | -0.071986 | C | -3.028611 | -5.819560 | -1.603434 |

|   |           |           |           |
|---|-----------|-----------|-----------|
| C | -3.970430 | -4.635152 | -3.485513 |
| H | -3.333746 | -2.595959 | -3.744763 |
| C | -3.849201 | -5.806773 | -2.690927 |
| H | -2.884849 | -6.677818 | -0.953881 |
| H | -4.627269 | -4.638967 | -4.351440 |
| H | -4.404054 | -6.706342 | -2.939142 |
| N | -2.319537 | -4.691138 | -1.268839 |

**TS3'-trans**

M06-L SCF energy in solvent: -8423.334517 a.u

|    |           |           |           |
|----|-----------|-----------|-----------|
| Ir | 2.662887  | 1.857099  | -0.473717 |
| P  | 3.762864  | 0.180066  | 0.653803  |
| O  | 3.890001  | -1.400755 | 0.171534  |
| O  | 5.372032  | 0.572217  | 0.770003  |
| C  | 4.593109  | -1.670633 | -0.993665 |
| C  | 3.836847  | -2.058552 | -2.116472 |
| H  | 2.756200  | -2.147416 | -2.008757 |
| C  | 4.478136  | -2.314967 | -3.301327 |
| H  | 3.913327  | -2.627350 | -4.178811 |
| C  | 5.879361  | -2.140985 | -3.413850 |
| C  | 6.541148  | -2.309778 | -4.653789 |
| H  | 5.949670  | -2.601134 | -5.521220 |
| C  | 7.893603  | -2.097047 | -4.769389 |
| H  | 8.388451  | -2.224377 | -5.729928 |
| C  | 8.638030  | -1.697182 | -3.641419 |
| H  | 9.704410  | -1.503823 | -3.739633 |
| C  | 8.029097  | -1.542854 | -2.417147 |
| H  | 8.615624  | -1.226310 | -1.557862 |
| C  | 6.640676  | -1.774584 | -2.256209 |
| C  | 5.976207  | -1.608584 | -0.994274 |
| C  | 6.715019  | -1.369339 | 0.266573  |
| C  | 7.758235  | -2.255742 | 0.705350  |
| C  | 8.054418  | -3.473800 | 0.043002  |
| H  | 7.465532  | -3.767736 | -0.822114 |
| C  | 9.061135  | -4.300097 | 0.486704  |
| H  | 9.259522  | -5.232902 | -0.037776 |
| C  | 9.830673  | -3.956414 | 1.615651  |
| H  | 10.629592 | -4.614456 | 1.950961  |
| C  | 9.553166  | -2.797436 | 2.298991  |
| H  | 10.123605 | -2.526477 | 3.186880  |
| C  | 8.514218  | -1.933239 | 1.878715  |
| C  | 8.200133  | -0.762136 | 2.608380  |
| H  | 8.794017  | -0.512178 | 3.486523  |
| C  | 7.147923  | 0.031487  | 2.233694  |

|   |           |           |           |
|---|-----------|-----------|-----------|
| H | 6.869736  | 0.921903  | 2.793416  |
| C | 6.398546  | -0.297549 | 1.087575  |
| C | 4.264106  | 3.306320  | -0.155193 |
| H | 4.568791  | 3.257436  | 0.892032  |
| C | 3.055866  | 4.012250  | -0.429662 |
| H | 2.535000  | 4.461378  | 0.420903  |
| C | 2.791648  | 4.698354  | -1.747970 |
| H | 3.389965  | 5.622925  | -1.818685 |
| H | 1.744177  | 5.021555  | -1.749315 |
| C | 3.046453  | 3.801535  | -2.962833 |
| H | 4.050307  | 3.974095  | -3.374978 |
| H | 2.353670  | 4.075229  | -3.771173 |
| C | 2.884682  | 2.319726  | -2.668406 |
| H | 2.061841  | 1.823311  | -3.189101 |
| C | 3.956840  | 1.491118  | -2.304339 |
| H | 3.879881  | 0.438021  | -2.577103 |
| C | 5.356230  | 1.994150  | -2.059673 |
| H | 5.938844  | 1.184333  | -1.606906 |
| H | 5.839489  | 2.201527  | -3.029370 |
| C | 5.411353  | 3.227338  | -1.151140 |
| H | 5.430662  | 4.149077  | -1.749648 |
| H | 6.358446  | 3.218481  | -0.598677 |
| C | -3.995389 | -2.421608 | 1.449511  |
| C | -4.250827 | -3.602937 | 2.230003  |
| H | -3.805285 | -3.820613 | 3.194838  |
| C | -5.226827 | -4.380260 | 1.552382  |
| H | -5.659471 | -5.307187 | 1.912908  |
| C | -4.839701 | -2.478533 | 0.263714  |
| C | -5.597920 | -3.693477 | 0.361818  |
| H | -6.351002 | -4.015787 | -0.350526 |
| C | -2.408908 | 0.710910  | 2.436406  |
| C | -1.945577 | -0.299537 | 3.480687  |
| H | -2.100726 | 0.000192  | 4.521940  |
| N | -2.966124 | -0.165733 | 1.388128  |
| C | -3.230472 | -1.300711 | 1.961507  |
| O | -2.789967 | -1.447065 | 3.232227  |
| H | -0.904289 | -0.621049 | 3.343835  |
| H | -1.563066 | 1.278106  | 2.015944  |
| C | -3.463741 | 1.690446  | 2.983812  |
| C | -4.187015 | 2.455795  | 1.887711  |
| C | -2.813684 | 2.650286  | 3.972923  |
| H | -4.205977 | 1.077359  | 3.527058  |
| H | -4.684479 | 1.783679  | 1.177469  |
| H | -4.946020 | 3.119984  | 2.319347  |

|    |            |           |           |    |           |           |           |
|----|------------|-----------|-----------|----|-----------|-----------|-----------|
| H  | -3.494687  | 3.070898  | 1.299105  | H  | -1.693380 | -3.897790 | 0.366328  |
| H  | -2.359557  | 2.135557  | 4.828794  | C  | -4.053700 | 4.617290  | -2.177722 |
| H  | -2.018613  | 3.234080  | 3.485339  | H  | -5.025448 | 4.114090  | -2.107099 |
| H  | -3.547036  | 3.359941  | 4.372573  | H  | -3.718170 | 4.829902  | -1.153276 |
| P  | -4.814082  | -1.271708 | -1.094388 | C  | -6.672502 | -0.667442 | 2.389491  |
| C  | -4.530488  | -2.239385 | -2.616799 | C  | -6.222077 | -1.315566 | 3.581008  |
| C  | -4.455066  | -1.492387 | -3.803497 | H  | -5.411460 | -0.986307 | 4.224141  |
| C  | -4.351145  | -3.624401 | -2.678074 | C  | -6.955304 | -2.529214 | 3.725140  |
| C  | -4.239496  | -2.119699 | -5.023911 | H  | -6.809609 | -3.272102 | 4.501813  |
| H  | -4.574564  | -0.407208 | -3.763107 | C  | -7.688289 | -1.482314 | 1.803239  |
| C  | -4.134853  | -4.250976 | -3.904285 | H  | -8.203342 | -1.284668 | 0.868213  |
| H  | -4.368175  | -4.221890 | -1.768036 | C  | -7.859245 | -2.631227 | 2.627139  |
| C  | -4.082962  | -3.504892 | -5.077465 | H  | -8.526708 | -3.462770 | 2.428272  |
| H  | -4.195531  | -1.527533 | -5.936473 | H  | -6.276850 | 0.255164  | 1.972746  |
| H  | -3.997699  | -5.331316 | -3.934872 | C  | -1.340382 | 2.012324  | -4.050115 |
| H  | -3.917021  | -3.998930 | -6.033025 | H  | -1.365932 | 3.080763  | -4.278407 |
| C  | -6.552026  | -0.739867 | -1.290806 | H  | -0.313449 | 1.660566  | -4.218955 |
| C  | -6.903649  | 0.543366  | -0.856436 | H  | -1.981533 | 1.500259  | -4.784204 |
| C  | -7.539934  | -1.577823 | -1.822803 | Fe | -5.928842 | -2.505420 | 1.968098  |
| C  | -8.228845  | 0.968585  | -0.915428 | C  | 1.971770  | 0.895501  | 2.443675  |
| H  | -6.126805  | 1.209175  | -0.472537 | C  | 3.075580  | -1.274598 | 3.030571  |
| C  | -8.862769  | -1.150715 | -1.883743 | C  | 2.141735  | 2.145057  | 1.584485  |
| H  | -7.269279  | -2.564935 | -2.200016 | N  | 3.053580  | -0.067997 | 2.152135  |
| C  | -9.209871  | 0.119409  | -1.422219 | C  | -0.130164 | 2.627324  | -1.551074 |
| H  | -8.495064  | 1.966170  | -0.570651 | C  | 0.424644  | 1.598518  | -0.708093 |
| H  | -9.625712  | -1.808438 | -2.296109 | H  | 0.363994  | 2.791029  | -2.506851 |
| H  | -10.245418 | 0.450368  | -1.469904 | H  | -0.007764 | 1.564366  | 0.295521  |
| Cu | -3.284900  | 0.236489  | -0.600531 | C  | 1.156827  | 0.429379  | -1.092133 |
| O  | -3.563427  | 2.270286  | -1.119050 | H  | 1.278123  | 0.187490  | -2.151996 |
| C  | -2.894985  | 2.567165  | -2.121435 | H  | 1.040497  | -0.462555 | -0.471393 |
| O  | -3.107630  | 3.708468  | -2.785856 | Cl | -1.358441 | -6.255305 | -1.183232 |
| C  | -1.793726  | 1.762704  | -2.638915 | H  | 1.000424  | 0.408428  | 2.212346  |
| N  | -1.850196  | 0.453683  | -2.142827 | H  | 2.930855  | 2.761226  | 2.042942  |
| C  | -1.274301  | -0.510835 | -2.798645 | H  | 1.220877  | 2.741729  | 1.635674  |
| H  | -0.835806  | -0.323399 | -3.787299 | H  | 2.924959  | -0.858066 | 4.035852  |
| C  | -1.205341  | -1.882361 | -2.346365 | C  | 1.947689  | 1.332202  | 3.891907  |
| C  | -0.907599  | -2.884394 | -3.284921 | C  | 0.731228  | 1.679019  | 4.480615  |
| C  | -1.448676  | -2.265237 | -1.015447 | C  | 3.124513  | 1.523872  | 4.622742  |
| C  | -0.922287  | -4.226883 | -2.936144 | C  | 0.680937  | 2.198430  | 5.770681  |
| H  | -0.703349  | -2.602777 | -4.318168 | H  | -0.186309 | 1.565518  | 3.900104  |
| C  | -1.488853  | -3.603689 | -0.659348 | C  | 3.078890  | 2.034325  | 5.915617  |
| H  | -1.593342  | -1.498568 | -0.253473 | H  | 4.080014  | 1.262880  | 4.163153  |
| C  | -1.242694  | -4.576641 | -1.626473 | C  | 1.857149  | 2.372180  | 6.495233  |
| H  | -0.722738  | -4.999377 | -3.674283 | H  | -0.277308 | 2.471035  | 6.211709  |



|                                               |           |           |           |   |            |           |           |
|-----------------------------------------------|-----------|-----------|-----------|---|------------|-----------|-----------|
| H                                             | 4.002606  | 2.171616  | 6.475065  | C | -6.281326  | 1.368455  | 2.580055  |
| H                                             | 1.823205  | 2.771364  | 7.506815  | H | -5.311958  | 1.428452  | 3.072940  |
| C                                             | 1.918099  | -2.230813 | 2.799591  | C | -7.326329  | 2.187553  | 2.924270  |
| C                                             | 0.914881  | -2.332742 | 3.768639  | H | -7.207556  | 2.929998  | 3.712269  |
| C                                             | 1.868284  | -3.095778 | 1.699489  | C | -8.566014  | 2.099376  | 2.246130  |
| C                                             | -0.108166 | -3.274106 | 3.651299  | C | -9.628754  | 2.987601  | 2.539182  |
| H                                             | 0.950540  | -1.674193 | 4.639743  | H | -9.478827  | 3.737079  | 3.315658  |
| C                                             | 0.852518  | -4.036326 | 1.581152  | C | -10.817766 | 2.918625  | 1.854334  |
| H                                             | 2.645051  | -3.046290 | 0.942503  | H | -11.624442 | 3.611385  | 2.084816  |
| C                                             | -0.140169 | -4.130563 | 2.555802  | C | -10.987263 | 1.954338  | 0.840261  |
| H                                             | -0.875406 | -3.339035 | 4.421426  | H | -11.921602 | 1.915518  | 0.283700  |
| H                                             | 0.840079  | -4.711168 | 0.726210  | C | -9.980896  | 1.066247  | 0.541062  |
| H                                             | -0.922197 | -4.884792 | 2.466500  | H | -10.124546 | 0.332857  | -0.248811 |
| C                                             | 4.412321  | -1.995158 | 3.076941  | C | -8.746415  | 1.098377  | 1.236483  |
| H                                             | 4.673520  | -2.486535 | 2.135747  | C | -7.672478  | 0.197126  | 0.934105  |
| H                                             | 5.221177  | -1.307171 | 3.345251  | C | -7.823186  | -0.917733 | -0.027176 |
| H                                             | 4.360294  | -2.768400 | 3.850870  | C | -8.828222  | -1.926827 | 0.129922  |
| C                                             | -4.102258 | 5.847518  | -3.039638 | C | -9.676215  | -1.984397 | 1.263741  |
| H                                             | -4.463180 | 5.614774  | -4.046856 | H | -9.563545  | -1.241602 | 2.049565  |
| H                                             | -4.772603 | 6.591841  | -2.597889 | C | -10.627906 | -2.969367 | 1.389751  |
| H                                             | -3.108072 | 6.299363  | -3.131653 | H | -11.262577 | -2.993849 | 2.273243  |
| C                                             | -0.631794 | 3.840833  | -0.922673 | C | -10.783911 | -3.950222 | 0.389749  |
| C                                             | -1.105996 | 4.002989  | 0.400844  | H | -11.545136 | -4.719798 | 0.497955  |
| C                                             | -0.758000 | 5.073540  | -1.563853 | C | -9.961803  | -3.939120 | -0.711425 |
| C                                             | -1.521762 | 5.319599  | 0.553439  | H | -10.059778 | -4.701600 | -1.483576 |
| H                                             | -1.161742 | 3.244127  | 1.172987  | C | -8.962850  | -2.947898 | -0.866307 |
| H                                             | -0.526993 | 5.363282  | -2.582248 | C | -8.085092  | -2.954141 | -1.977398 |
| C                                             | -2.106526 | 6.071721  | 1.594182  | H | -8.207839  | -3.721234 | -2.740991 |
| C                                             | -1.597589 | 7.299026  | -0.863643 | C | -7.079840  | -2.025066 | -2.083764 |
| C                                             | -2.428551 | 7.389894  | 1.402887  | H | -6.383229  | -2.020390 | -2.919674 |
| H                                             | -2.294891 | 5.576213  | 2.544135  | C | -6.949851  | -1.032965 | -1.094610 |
| C                                             | -2.163252 | 8.009258  | 0.151844  | C | -4.180927  | 2.190762  | -2.444301 |
| H                                             | -1.360596 | 7.709885  | -1.840581 | H | -4.534095  | 1.332288  | -3.017203 |
| H                                             | -2.881595 | 7.966846  | 2.204440  | C | -2.804745  | 2.524921  | -2.593475 |
| H                                             | -2.400537 | 9.056083  | -0.011774 | H | -2.220798  | 1.915528  | -3.288926 |
| N                                             | -1.289993 | 5.970860  | -0.682742 | C | -2.240215  | 3.903831  | -2.353670 |
| <b>TS3'-cis</b>                               |           |           |           | H | -2.453957  | 4.561164  | -3.213831 |
| M06-L SCF energy in solvent: -8423.340936 a.u |           |           |           | H | -1.147614  | 3.809732  | -2.310199 |
| Ir                                            | -3.080819 | 1.421776  | -0.725354 | C | -2.736366  | 4.546849  | -1.053731 |
| P                                             | -4.613940 | -0.197999 | -0.212060 | H | -3.621047  | 5.170210  | -1.238852 |
| O                                             | -5.358987 | -0.379922 | 1.248155  | H | -1.969729  | 5.237570  | -0.677217 |
| O                                             | -5.917428 | -0.115744 | -1.236158 | C | -3.059165  | 3.541146  | 0.038297  |
| C                                             | -6.456802 | 0.413549  | 1.561659  | H | -2.405674  | 3.563869  | 0.912060  |
|                                               |           |           |           | C | -4.339111  | 3.010961  | 0.260114  |

|   |           |           |           |    |           |           |           |
|---|-----------|-----------|-----------|----|-----------|-----------|-----------|
| H | -4.561909 | 2.682612  | 1.276197  | H  | 1.803922  | -3.857116 | 4.914181  |
| C | -5.548277 | 3.287387  | -0.597639 | C  | 6.415616  | 0.089121  | 2.836038  |
| H | -6.323852 | 2.552429  | -0.342773 | C  | 6.516161  | 1.474182  | 3.008345  |
| H | -5.971568 | 4.270687  | -0.331971 | C  | 7.283267  | -0.752899 | 3.542276  |
| C | -5.256829 | 3.207946  | -2.100368 | C  | 7.488260  | 2.010767  | 3.851722  |
| H | -4.967971 | 4.192393  | -2.492208 | H  | 5.825099  | 2.129389  | 2.473355  |
| H | -6.179649 | 2.941505  | -2.628984 | C  | 8.254645  | -0.216749 | 4.380113  |
| C | 6.054940  | -1.410769 | -0.951861 | H  | 7.200785  | -1.834243 | 3.428300  |
| C | 6.672136  | -2.559390 | -1.554124 | C  | 8.362139  | 1.166375  | 4.530395  |
| H | 6.881438  | -2.671564 | -2.612372 | H  | 7.562937  | 3.089300  | 3.976986  |
| C | 6.993349  | -3.481016 | -0.522238 | H  | 8.929477  | -0.877360 | 4.922121  |
| H | 7.500205  | -4.430434 | -0.656935 | H  | 9.123886  | 1.583208  | 5.186282  |
| C | 6.001431  | -1.630689 | 0.486739  | Cu | 3.996245  | 0.867856  | 0.435285  |
| C | 6.595396  | -2.916869 | 0.722949  | O  | 3.279753  | 2.711907  | 1.207779  |
| H | 6.710487  | -3.380981 | 1.697975  | C  | 2.211884  | 2.511340  | 1.813205  |
| C | 5.282335  | 1.895665  | -2.299332 | O  | 1.672342  | 3.465169  | 2.595541  |
| C | 5.711994  | 1.078908  | -3.515629 | C  | 1.406221  | 1.308431  | 1.704448  |
| H | 6.516357  | 1.521976  | -4.109486 | N  | 1.967599  | 0.370229  | 0.851366  |
| N | 5.104202  | 0.851642  | -1.272238 | C  | 1.459157  | -0.828024 | 0.749426  |
| C | 5.746244  | -0.196573 | -1.683285 | H  | 0.678905  | -1.178371 | 1.438962  |
| O | 6.224645  | -0.151463 | -2.948528 | C  | 1.900456  | -1.770231 | -0.261658 |
| H | 4.871995  | 0.820817  | -4.174448 | C  | 1.602718  | -3.137013 | -0.124346 |
| H | 4.322035  | 2.399284  | -2.473733 | C  | 2.627746  | -1.362838 | -1.394940 |
| C | 6.317320  | 2.937774  | -1.843862 | C  | 2.070610  | -4.074864 | -1.033851 |
| C | 5.949710  | 3.515563  | -0.485377 | H  | 1.020324  | -3.467211 | 0.736438  |
| C | 6.465068  | 4.046275  | -2.876761 | C  | 3.096223  | -2.287028 | -2.317025 |
| H | 7.283759  | 2.410213  | -1.751405 | H  | 2.803583  | -0.299067 | -1.553683 |
| H | 5.953874  | 2.746570  | 0.297277  | C  | 2.833590  | -3.642697 | -2.118312 |
| H | 6.651682  | 4.305280  | -0.191415 | H  | 1.848888  | -5.132421 | -0.912294 |
| H | 4.938572  | 3.948290  | -0.504855 | H  | 3.667255  | -1.967709 | -3.187799 |
| H | 6.674712  | 3.667438  | -3.885514 | C  | 2.451682  | 4.669873  | 2.741424  |
| H | 5.544259  | 4.640254  | -2.934806 | H  | 3.445857  | 4.398686  | 3.118018  |
| H | 7.282685  | 4.723253  | -2.605734 | H  | 2.597137  | 5.118321  | 1.749873  |
| P | 5.155868  | -0.548231 | 1.677693  | C  | 8.948992  | -0.121947 | 0.586316  |
| C | 4.190690  | -1.691449 | 2.724777  | C  | 9.014626  | -0.094378 | -0.837081 |
| C | 3.734777  | -1.222058 | 3.966458  | H  | 8.639126  | 0.695585  | -1.480499 |
| C | 3.757280  | -2.944282 | 2.279676  | C  | 9.587605  | -1.321276 | -1.282528 |
| C | 2.883220  | -1.994546 | 4.747998  | H  | 9.729483  | -1.620343 | -2.315522 |
| H | 4.054091  | -0.241193 | 4.323300  | C  | 9.483929  | -1.371371 | 1.024411  |
| C | 2.906985  | -3.718913 | 3.066849  | H  | 9.550335  | -1.710662 | 2.052514  |
| H | 4.078834  | -3.318676 | 1.308610  | C  | 9.878869  | -2.111391 | -0.130348 |
| C | 2.467638  | -3.249079 | 4.301352  | H  | 10.291229 | -3.114765 | -0.134491 |
| H | 2.546118  | -1.618021 | 5.712574  | H  | 8.524730  | 0.649765  | 1.221547  |
| H | 2.586933  | -4.696757 | 2.707435  | C  | 0.565904  | 0.890758  | 2.871083  |

|    |           |           |           |
|----|-----------|-----------|-----------|
| H  | 0.193852  | 1.760208  | 3.419335  |
| H  | -0.294143 | 0.283866  | 2.572064  |
| H  | 1.158737  | 0.274113  | 3.566110  |
| Fe | 7.900737  | -1.681836 | -0.212854 |
| C  | -2.627865 | -1.630400 | -1.093484 |
| C  | -3.990185 | -2.877696 | 0.603095  |
| C  | -2.601421 | -0.328576 | -1.885306 |
| N  | -3.887538 | -1.705735 | -0.326611 |
| C  | -0.129632 | 2.153888  | 0.266851  |
| C  | -1.033106 | 1.052363  | 0.190402  |
| H  | -0.373313 | 2.969232  | 0.950955  |
| H  | -0.654516 | 0.204882  | -0.387041 |
| C  | -2.115511 | 0.791420  | 1.097750  |
| H  | -2.278019 | 1.494017  | 1.922725  |
| H  | -2.305329 | -0.245680 | 1.384989  |
| Cl | 3.453467  | -4.807639 | -3.253151 |
| H  | -3.515653 | -3.680963 | 0.020863  |
| C  | -5.409474 | -3.338072 | 0.878204  |
| H  | -5.991610 | -2.634452 | 1.478300  |
| H  | -5.948180 | -3.507497 | -0.061080 |
| H  | -5.371298 | -4.288757 | 1.422066  |
| C  | -3.131203 | -2.679070 | 1.838169  |
| C  | -1.775368 | -3.027754 | 1.783253  |
| C  | -3.625548 | -2.129994 | 3.026931  |
| C  | -0.929256 | -2.801164 | 2.866788  |
| H  | -1.385803 | -3.491522 | 0.873446  |
| C  | -2.782691 | -1.903357 | 4.111849  |
| H  | -4.679131 | -1.870502 | 3.102511  |
| C  | -1.429778 | -2.228046 | 4.032625  |
| H  | 0.124541  | -3.079369 | 2.811354  |
| H  | -3.188014 | -1.478874 | 5.028899  |
| H  | -0.767495 | -2.048828 | 4.879146  |
| H  | -1.784984 | -1.612934 | -0.375127 |
| H  | -3.288136 | -0.412579 | -2.743588 |
| H  | -1.597398 | -0.189817 | -2.307163 |
| C  | -2.428698 | -2.812074 | -2.014665 |
| C  | -1.127705 | -3.148919 | -2.397641 |
| C  | -3.497871 | -3.533531 | -2.551799 |
| C  | -0.894557 | -4.185794 | -3.295422 |
| H  | -0.289693 | -2.582683 | -1.984907 |
| C  | -3.266976 | -4.572895 | -3.449116 |
| H  | -4.515829 | -3.280495 | -2.250269 |
| C  | -1.966389 | -4.902989 | -3.823008 |
| H  | 0.126968  | -4.437599 | -3.578250 |

|   |           |           |           |
|---|-----------|-----------|-----------|
| H | -4.108393 | -5.131815 | -3.855548 |
| H | -1.788514 | -5.718204 | -4.521660 |
| C | 1.705904  | 5.577096  | 3.679927  |
| H | 2.259187  | 6.511311  | 3.819750  |
| H | 0.714456  | 5.825066  | 3.286185  |
| H | 1.575065  | 5.108705  | 4.660655  |
| C | 0.684632  | 2.490680  | -0.879016 |
| C | 0.922333  | 1.672806  | -2.009625 |
| C | 1.332361  | 3.706876  | -1.093389 |
| C | 1.689775  | 2.396331  | -2.908998 |
| H | 0.554050  | 0.665588  | -2.171268 |
| H | 1.378344  | 4.600575  | -0.482777 |
| C | 2.217363  | 2.156013  | -4.196250 |
| C | 2.644638  | 4.636342  | -2.979869 |
| C | 2.928072  | 3.130435  | -4.850455 |
| H | 2.031834  | 1.184593  | -4.651203 |
| C | 3.136861  | 4.390993  | -4.227482 |
| H | 2.770207  | 5.574744  | -2.447267 |
| H | 3.322341  | 2.949973  | -5.847454 |
| H | 3.690841  | 5.175854  | -4.733871 |
| N | 1.932801  | 3.664679  | -2.319792 |

**(2S,3R)-Int-I**

M06-L SCF energy in solvent: -1610.714158 a.u

|    |           |           |           |
|----|-----------|-----------|-----------|
| C  | 0.858090  | -1.289539 | -0.430567 |
| N  | -0.420770 | -0.684332 | -0.086456 |
| C  | -1.468659 | -1.066863 | -0.706454 |
| H  | -1.456054 | -1.831951 | -1.501869 |
| C  | -2.785321 | -0.501395 | -0.415637 |
| C  | -3.890885 | -0.892858 | -1.178360 |
| C  | -2.969198 | 0.440475  | 0.606756  |
| C  | -5.151341 | -0.356884 | -0.944640 |
| H  | -3.758602 | -1.630420 | -1.970113 |
| C  | -4.218534 | 0.985191  | 0.853741  |
| H  | -2.109170 | 0.730980  | 1.206879  |
| C  | -5.301270 | 0.582855  | 0.070410  |
| H  | -6.010032 | -0.658284 | -1.538455 |
| H  | -4.365576 | 1.717468  | 1.643373  |
| Cl | -6.873131 | 1.273117  | 0.371397  |
| C  | 2.212356  | -1.874044 | 2.747568  |
| H  | 3.104761  | -2.397082 | 2.399784  |
| H  | 1.892763  | -2.083058 | 3.766223  |
| C  | 1.557872  | -1.019416 | 1.963358  |
| H  | 0.662678  | -0.511811 | 2.328319  |

|   |           |           |           |    |           |           |           |
|---|-----------|-----------|-----------|----|-----------|-----------|-----------|
| C | 1.938208  | -0.709508 | 0.543146  | H  | -0.251141 | 0.445199  | -1.600856 |
| H | 2.875059  | -1.235603 | 0.315270  | C  | -1.618602 | -0.891799 | -0.644257 |
| C | 2.169516  | 0.757771  | 0.327778  | C  | -1.865004 | -2.086154 | 0.050807  |
| C | 1.256485  | 1.822675  | 0.475629  | C  | -2.697710 | -0.209654 | -1.230662 |
| C | 3.385917  | 1.293007  | -0.072395 | C  | -3.160255 | -2.572950 | 0.160632  |
| C | 1.921812  | 3.002578  | 0.161563  | H  | -1.050686 | -2.613625 | 0.541986  |
| H | 0.215423  | 1.743768  | 0.759629  | C  | -3.995269 | -0.689722 | -1.127716 |
| H | 4.335301  | 0.813834  | -0.279271 | H  | -2.512571 | 0.714764  | -1.780575 |
| C | 1.570360  | 4.366679  | 0.104837  | C  | -4.213215 | -1.872029 | -0.425065 |
| C | 4.174546  | 3.601028  | -0.535383 | H  | -3.355746 | -3.493695 | 0.703429  |
| C | 2.493999  | 5.312071  | -0.261028 | H  | -4.827486 | -0.161582 | -1.585099 |
| H | 0.549109  | 4.642727  | 0.357954  | C  | 0.983221  | 1.746204  | 0.197059  |
| C | 3.819056  | 4.916007  | -0.584188 | C  | -0.189094 | 1.118747  | 0.717015  |
| H | 5.167087  | 3.227111  | -0.769840 | C  | -0.757715 | 3.155516  | -0.138408 |
| H | 2.218584  | 6.362785  | -0.303208 | C  | -1.688451 | 4.155703  | -0.459977 |
| H | 4.565583  | 5.650194  | -0.873372 | C  | -2.514442 | 1.907790  | 0.978171  |
| N | 3.251202  | 2.652293  | -0.174696 | C  | -3.000658 | 4.024765  | -0.059596 |
| C | 1.241234  | -0.994894 | -1.884478 | H  | -1.352167 | 5.026204  | -1.017302 |
| H | 2.247846  | -1.367280 | -2.103379 | C  | -3.416275 | 2.890998  | 0.674262  |
| H | 1.222031  | 0.086931  | -2.052194 | H  | -2.741514 | 1.004146  | 1.537519  |
| H | 0.540533  | -1.466648 | -2.583377 | H  | -3.721650 | 4.801825  | -0.301445 |
| C | 0.802735  | -2.815805 | -0.234456 | H  | -4.444536 | 2.784032  | 1.005577  |
| O | -0.189703 | -3.472997 | -0.017474 | Cl | -5.836221 | -2.486759 | -0.283860 |
| O | 2.035541  | -3.350364 | -0.360638 | H  | -0.236606 | 0.353952  | 1.510362  |
| C | 2.100598  | -4.775130 | -0.143674 | H  | 0.882909  | -1.570511 | 0.247576  |
| C | 3.533768  | -5.193333 | -0.324523 | Cl | 0.262306  | -1.655595 | 2.453728  |
| H | 1.723900  | -4.985375 | 0.865086  | C  | 0.618640  | 2.959927  | -0.370379 |
| H | 1.422995  | -5.267918 | -0.851235 | H  | 1.263347  | 3.651917  | -0.900740 |
| H | 3.634827  | -6.272948 | -0.171354 | N  | -1.219182 | 2.039835  | 0.569675  |
| H | 4.186792  | -4.685427 | 0.393567  | C  | 2.166293  | 0.252079  | -2.292978 |
| H | 3.889593  | -4.957836 | -1.333218 | H  | 3.182701  | 0.580106  | -2.523357 |

#### TS6

M06-L SCF energy in solvent: -2071.549248 a.u

|   |           |           |           |   |          |           |           |
|---|-----------|-----------|-----------|---|----------|-----------|-----------|
| C | 3.955205  | 0.957622  | 1.969469  | C | 3.241398 | -1.219770 | -0.554296 |
| H | 4.638491  | 1.589852  | 1.398741  | O | 3.101730 | -2.319849 | -0.077463 |
| H | 4.291651  | 0.637021  | 2.952916  | O | 4.422165 | -0.657328 | -0.863552 |
| C | 2.764333  | 0.599630  | 1.492772  | C | 5.575444 | -1.434795 | -0.467735 |
| H | 2.093500  | -0.044834 | 2.073379  | C | 6.796574 | -0.604473 | -0.749354 |
| C | 2.277072  | 1.018369  | 0.132660  | H | 5.565130 | -2.376884 | -1.028574 |
| H | 3.037681  | 1.651575  | -0.346247 | H | 5.467416 | -1.684498 | 0.594317  |
| C | 2.101065  | -0.247404 | -0.850700 | H | 7.699288 | -1.158439 | -0.471633 |
| N | 0.861621  | -0.959846 | -0.593142 | H | 6.867801 | -0.349091 | -1.812092 |
| C | -0.294758 | -0.292378 | -0.797547 | H | 6.779340 | 0.327223  | -0.173642 |

**Int-IIS**

M06-L SCF energy in solvent: -2071.559605 a.u

|    |           |           |           |
|----|-----------|-----------|-----------|
| C  | 4.007192  | 1.036271  | 1.809873  |
| H  | 4.727699  | 1.547186  | 1.167860  |
| H  | 4.324720  | 0.819720  | 2.827389  |
| C  | 2.797308  | 0.689089  | 1.374174  |
| H  | 2.086914  | 0.175580  | 2.032782  |
| C  | 2.337771  | 0.954093  | -0.036421 |
| H  | 3.122065  | 1.510854  | -0.569569 |
| C  | 2.078983  | -0.406277 | -0.842664 |
| N  | 0.807765  | -1.033223 | -0.519493 |
| C  | -0.338597 | -0.190656 | -0.686350 |
| H  | -0.295685 | 0.258754  | -1.689002 |
| C  | -1.666916 | -0.882554 | -0.565220 |
| C  | -1.921603 | -1.877204 | 0.384464  |
| C  | -2.702963 | -0.481327 | -1.415700 |
| C  | -3.188925 | -2.439900 | 0.492464  |
| H  | -1.143855 | -2.186131 | 1.080148  |
| C  | -3.975403 | -1.034510 | -1.320452 |
| H  | -2.511804 | 0.284159  | -2.169880 |
| C  | -4.205415 | -2.010286 | -0.355452 |
| H  | -3.387312 | -3.204803 | 1.238352  |
| H  | -4.776486 | -0.721044 | -1.984988 |
| C  | 1.070138  | 1.723817  | -0.037219 |
| C  | -0.175865 | 1.038338  | 0.333839  |
| C  | -0.600114 | 3.234341  | -0.280224 |
| C  | -1.427079 | 4.343095  | -0.486012 |
| C  | -2.474642 | 1.982262  | 0.558780  |
| C  | -2.770557 | 4.250949  | -0.172563 |
| H  | -0.997186 | 5.261969  | -0.874813 |
| C  | -3.299423 | 3.064957  | 0.366457  |
| H  | -2.782480 | 1.038653  | 0.999503  |
| H  | -3.420494 | 5.109538  | -0.324286 |
| H  | -4.344219 | 2.992224  | 0.650069  |
| Cl | -5.799833 | -2.705487 | -0.210194 |
| H  | -0.202036 | 0.557091  | 1.358707  |
| H  | 0.836705  | -1.457811 | 0.413972  |
| Cl | -0.041581 | -0.789287 | 2.884461  |
| C  | 0.796139  | 3.000620  | -0.440168 |
| H  | 1.501266  | 3.738279  | -0.807124 |
| N  | -1.170473 | 2.074023  | 0.205824  |
| C  | 2.168232  | -0.103571 | -2.338332 |
| H  | 1.870477  | -0.980887 | -2.921857 |
| H  | 3.189971  | 0.172762  | -2.610184 |

|   |          |           |           |
|---|----------|-----------|-----------|
| H | 1.514857 | 0.732436  | -2.617034 |
| C | 3.172441 | -1.380119 | -0.407573 |
| O | 2.989183 | -2.356314 | 0.280157  |
| O | 4.377162 | -0.964449 | -0.840039 |
| C | 5.491293 | -1.736398 | -0.338722 |
| C | 6.752216 | -1.064296 | -0.806502 |
| H | 5.412400 | -1.777445 | 0.754017  |
| H | 5.396879 | -2.763334 | -0.711591 |
| H | 7.627618 | -1.620834 | -0.455776 |
| H | 6.821391 | -0.042552 | -0.417485 |
| H | 6.795545 | -1.017109 | -1.899891 |

**TS7**

M06-L SCF energy in solvent: -2071.539457 a.u

|   |           |           |           |
|---|-----------|-----------|-----------|
| C | 3.570818  | 0.370559  | 2.313474  |
| H | 4.482531  | 0.783770  | 1.879587  |
| H | 3.624994  | 0.046073  | 3.350086  |
| C | 2.444538  | 0.273371  | 1.610342  |
| H | 1.540523  | -0.136799 | 2.064495  |
| C | 2.316735  | 0.706046  | 0.173558  |
| H | 3.242495  | 1.214242  | -0.130050 |
| C | 2.080042  | -0.503048 | -0.779778 |
| N | 0.758481  | -1.044178 | -0.471510 |
| C | -0.379309 | -0.225313 | -0.865588 |
| H | -0.394802 | 0.001215  | -1.956085 |
| C | -1.654118 | -0.980666 | -0.563501 |
| C | -1.839466 | -1.610969 | 0.670131  |
| C | -2.653876 | -1.091196 | -1.532446 |
| C | -3.007908 | -2.311287 | 0.942280  |
| H | -1.058509 | -1.545909 | 1.423450  |
| C | -3.831173 | -1.788577 | -1.278639 |
| H | -2.509170 | -0.623567 | -2.508073 |
| C | -3.996514 | -2.389938 | -0.035025 |
| H | -3.156029 | -2.789354 | 1.906961  |
| H | -4.606666 | -1.876720 | -2.035114 |
| C | 1.151303  | 1.626324  | -0.010693 |
| C | -0.176564 | 1.109263  | -0.146119 |
| C | -0.213187 | 3.397443  | -0.283756 |
| C | -0.854062 | 4.642329  | -0.377725 |
| C | -2.329059 | 2.294233  | -0.616758 |
| C | -2.208423 | 4.699472  | -0.611030 |
| H | -0.259160 | 5.543914  | -0.256747 |
| C | -2.953600 | 3.507072  | -0.730316 |
| H | -2.842645 | 1.338693  | -0.657006 |

|    |           |           |           |
|----|-----------|-----------|-----------|
| H  | -2.709943 | 5.661141  | -0.687107 |
| H  | -4.026557 | 3.530772  | -0.893215 |
| Cl | -5.468076 | -3.264996 | 0.300792  |
| H  | -0.558264 | 0.937259  | 1.266837  |
| H  | 0.674155  | -1.994993 | -0.819801 |
| Cl | -1.061221 | 0.962730  | 2.678627  |
| C  | 1.116804  | 3.004618  | -0.040053 |
| H  | 1.944963  | 3.686386  | 0.115671  |
| N  | -0.980045 | 2.240926  | -0.427512 |
| C  | 2.261068  | -0.060972 | -2.240501 |
| H  | 3.292512  | 0.255036  | -2.428846 |
| H  | 2.019589  | -0.880744 | -2.928393 |
| H  | 1.604010  | 0.785708  | -2.473641 |
| C  | 3.080753  | -1.615872 | -0.495868 |
| O  | 2.791417  | -2.782221 | -0.342734 |
| O  | 4.336756  | -1.137160 | -0.483893 |
| C  | 5.353458  | -2.108549 | -0.156696 |
| C  | 6.677740  | -1.396642 | -0.175886 |
| H  | 5.301399  | -2.927744 | -0.883784 |
| H  | 5.116150  | -2.530038 | 0.827987  |
| H  | 7.485308  | -2.094793 | 0.067871  |
| H  | 6.882885  | -0.969766 | -1.163406 |
| H  | 6.697849  | -0.583654 | 0.557933  |

*(1S,3S,4R)*-**3a**

M06-L SCF energy in solvent: -1610.725798 a.u

|   |           |           |           |
|---|-----------|-----------|-----------|
| C | 3.331832  | 0.451980  | 2.571096  |
| H | 4.153903  | 1.104930  | 2.274487  |
| H | 3.389498  | 0.018463  | 3.567295  |
| C | 2.309230  | 0.209259  | 1.753518  |
| H | 1.496014  | -0.451987 | 2.061558  |
| C | 2.166971  | 0.784215  | 0.371576  |
| H | 3.058850  | 1.388813  | 0.151152  |
| C | 2.054163  | -0.337279 | -0.703045 |
| N | 0.749774  | -0.975912 | -0.521299 |
| C | -0.406253 | -0.186952 | -0.947969 |
| H | -0.469153 | -0.081023 | -2.057074 |
| C | -1.662094 | -0.910958 | -0.504471 |
| C | -1.951755 | -1.049086 | 0.855062  |
| C | -2.537384 | -1.462010 | -1.438451 |
| C | -3.093147 | -1.717108 | 1.276918  |
| H | -1.266811 | -0.620522 | 1.586007  |
| C | -3.688093 | -2.137108 | -1.037265 |
| H | -2.318815 | -1.360095 | -2.502779 |

|    |           |           |           |
|----|-----------|-----------|-----------|
| C  | -3.953246 | -2.256778 | 0.321656  |
| H  | -3.322934 | -1.822193 | 2.334242  |
| H  | -4.371474 | -2.565354 | -1.765985 |
| C  | 0.933609  | 1.633308  | 0.264585  |
| C  | -0.227741 | 1.163006  | -0.333046 |
| C  | -0.581062 | 3.301996  | 0.331891  |
| C  | -1.374446 | 4.458030  | 0.465482  |
| C  | -2.437265 | 2.214570  | -0.809347 |
| C  | -2.655588 | 4.488344  | -0.023512 |
| H  | -0.938084 | 5.321535  | 0.963013  |
| C  | -3.187670 | 3.344536  | -0.672604 |
| H  | -2.789564 | 1.307841  | -1.291009 |
| H  | -3.263256 | 5.383830  | 0.079785  |
| H  | -4.198185 | 3.349336  | -1.070938 |
| Cl | -5.390744 | -3.099451 | 0.841513  |
| H  | 0.748466  | -1.897414 | -0.950258 |
| C  | 0.717960  | 2.955558  | 0.687808  |
| H  | 1.422126  | 3.600579  | 1.200597  |
| N  | -1.155614 | 2.175509  | -0.311815 |
| C  | 2.291276  | 0.235105  | -2.109797 |
| H  | 3.304280  | 0.640570  | -2.202011 |
| H  | 2.161832  | -0.543614 | -2.872003 |
| H  | 1.581418  | 1.042967  | -2.319843 |
| C  | 3.100948  | -1.415929 | -0.458935 |
| O  | 2.873713  | -2.605204 | -0.400616 |
| O  | 4.327414  | -0.874579 | -0.355106 |
| C  | 5.379631  | -1.809058 | -0.040962 |
| C  | 6.643201  | -1.015498 | 0.145091  |
| H  | 5.454767  | -2.540416 | -0.855078 |
| H  | 5.090332  | -2.357675 | 0.863894  |
| H  | 7.476201  | -1.682015 | 0.392009  |
| H  | 6.904358  | -0.466559 | -0.765995 |
| H  | 6.532288  | -0.291109 | 0.959149  |

**TS6'**

M06-L SCF energy in solvent: -2071.551480 a.u

|   |           |           |          |
|---|-----------|-----------|----------|
| C | -4.463189 | 0.748816  | 2.200221 |
| H | -4.235767 | 0.167568  | 3.093568 |
| H | -5.449397 | 1.204832  | 2.149682 |
| C | -3.569258 | 0.896590  | 1.224835 |
| H | -3.828250 | 1.489429  | 0.341440 |
| C | -2.201161 | 0.290635  | 1.238920 |
| H | -1.993045 | -0.182399 | 2.212045 |
| C | -2.122584 | -0.975598 | 0.227206 |

|    |           |           |           |
|----|-----------|-----------|-----------|
| N  | -0.737545 | -1.397574 | 0.048229  |
| C  | 0.196842  | -0.538494 | -0.410780 |
| H  | -0.160398 | 0.170381  | -1.155854 |
| C  | 1.609961  | -0.897546 | -0.511470 |
| C  | 2.224675  | -1.879985 | 0.282303  |
| C  | 2.392914  | -0.165109 | -1.417656 |
| C  | 3.584878  | -2.124391 | 0.158352  |
| H  | 1.648430  | -2.416803 | 1.038093  |
| C  | 3.752812  | -0.409566 | -1.554602 |
| H  | 1.922983  | 0.609104  | -2.025527 |
| C  | 4.336886  | -1.392257 | -0.761387 |
| H  | 4.066901  | -2.877631 | 0.775824  |
| H  | 4.355719  | 0.154714  | -2.261165 |
| C  | -1.118323 | 1.259689  | 0.950100  |
| C  | 0.240056  | 0.880863  | 1.139811  |
| C  | 0.181277  | 2.942252  | 0.180722  |
| C  | 0.793719  | 4.073760  | -0.384200 |
| C  | 2.374899  | 2.072692  | 0.752275  |
| C  | 2.164995  | 4.192459  | -0.369452 |
| H  | 0.163861  | 4.843383  | -0.822938 |
| C  | 2.965285  | 3.181664  | 0.212262  |
| H  | 2.910164  | 1.249886  | 1.217680  |
| H  | 2.638621  | 5.069888  | -0.803209 |
| H  | 4.046992  | 3.268511  | 0.238653  |
| Cl | 6.042472  | -1.707983 | -0.913649 |
| H  | 0.603903  | 0.168377  | 1.887471  |
| H  | -0.430557 | -1.957384 | 0.874091  |
| Cl | 0.017439  | -1.970554 | 2.947353  |
| C  | -1.144907 | 2.503789  | 0.329782  |
| H  | -2.014443 | 3.047509  | -0.019255 |
| N  | 1.014913  | 1.956177  | 0.727556  |
| C  | -2.885084 | -2.134320 | 0.849403  |
| H  | -3.903183 | -1.828537 | 1.101802  |
| H  | -2.942301 | -2.980213 | 0.157939  |
| H  | -2.366202 | -2.449767 | 1.762906  |
| C  | -2.706532 | -0.506103 | -1.103924 |
| O  | -2.175006 | 0.291462  | -1.853247 |
| O  | -3.924532 | -1.019734 | -1.320058 |
| C  | -4.593629 | -0.533873 | -2.505721 |
| C  | -5.956731 | -1.166748 | -2.541465 |
| H  | -3.982141 | -0.792168 | -3.378297 |
| H  | -4.634687 | 0.561263  | -2.452600 |
| H  | -6.506243 | -0.827227 | -3.425634 |
| H  | -5.883453 | -2.258185 | -2.583728 |

|   |           |           |           |
|---|-----------|-----------|-----------|
| H | -6.538088 | -0.898764 | -1.653220 |
|---|-----------|-----------|-----------|

**Int-IIIS'**

M06-L SCF energy in solvent: -2071.563473 a.u

|    |           |           |           |
|----|-----------|-----------|-----------|
| C  | -4.605649 | 1.352781  | 1.780589  |
| H  | -4.365433 | 1.130586  | 2.820237  |
| H  | -5.619028 | 1.689789  | 1.573335  |
| C  | -3.697481 | 1.218175  | 0.815402  |
| H  | -3.967311 | 1.448405  | -0.219818 |
| C  | -2.300990 | 0.733920  | 1.038083  |
| H  | -2.059840 | 0.681602  | 2.117026  |
| C  | -2.095806 | -0.790148 | 0.579537  |
| N  | -0.689802 | -1.183270 | 0.535003  |
| C  | 0.229840  | -0.309365 | -0.147065 |
| H  | -0.103177 | -0.177313 | -1.183800 |
| C  | 1.637090  | -0.841146 | -0.143226 |
| C  | 2.313212  | -1.112671 | 1.052898  |
| C  | 2.303833  | -1.026299 | -1.356419 |
| C  | 3.628246  | -1.564083 | 1.031023  |
| H  | 1.808885  | -0.956902 | 2.012582  |
| C  | 3.619430  | -1.477287 | -1.393336 |
| H  | 1.785258  | -0.815972 | -2.292396 |
| C  | 4.269846  | -1.742727 | -0.192790 |
| H  | 4.154775  | -1.778220 | 1.957875  |
| H  | 4.135680  | -1.624557 | -2.338595 |
| C  | -1.265732 | 1.579355  | 0.424976  |
| C  | 0.133762  | 1.127177  | 0.525711  |
| C  | -0.017695 | 3.105501  | -0.680237 |
| C  | 0.503763  | 4.177868  | -1.415764 |
| C  | 2.206964  | 2.272452  | -0.318052 |
| C  | 1.868668  | 4.277396  | -1.594430 |
| H  | -0.178946 | 4.915328  | -1.828120 |
| C  | 2.734054  | 3.319508  | -1.034003 |
| H  | 2.799836  | 1.499686  | 0.161998  |
| H  | 2.280737  | 5.108646  | -2.161972 |
| H  | 3.810291  | 3.396495  | -1.146686 |
| Cl | 5.919273  | -2.311616 | -0.224124 |
| H  | 0.459137  | 0.999274  | 1.585531  |
| H  | -0.376707 | -1.317747 | 1.506933  |
| Cl | -0.021983 | -0.129964 | 3.506221  |
| C  | -1.334263 | 2.734711  | -0.300223 |
| H  | -2.225925 | 3.290791  | -0.565654 |
| N  | 0.865125  | 2.171278  | -0.171112 |
| C  | -2.792009 | -1.696068 | 1.580931  |

|   |           |           |           |
|---|-----------|-----------|-----------|
| H | -3.858057 | -1.459930 | 1.646536  |
| H | -2.687170 | -2.744195 | 1.289087  |
| H | -2.332535 | -1.551117 | 2.566957  |
| C | -2.637609 | -0.914075 | -0.845315 |
| O | -2.318939 | -0.167320 | -1.753517 |
| O | -3.493339 | -1.932596 | -0.992241 |
| C | -4.011408 | -2.112213 | -2.328828 |
| C | -4.909188 | -3.318193 | -2.303165 |
| H | -3.164954 | -2.228805 | -3.015596 |
| H | -4.539965 | -1.195837 | -2.619413 |
| H | -5.333813 | -3.493538 | -3.297172 |
| H | -4.354790 | -4.214051 | -2.005388 |
| H | -5.735162 | -3.179693 | -1.598083 |

**TS7'**

M06-L SCF energy in solvent: -2071.535337 a.u

|   |           |           |           |
|---|-----------|-----------|-----------|
| C | -4.500457 | 0.929038  | 2.071096  |
| H | -4.151358 | 0.825314  | 3.098832  |
| H | -5.555600 | 1.156660  | 1.935610  |
| C | -3.671069 | 0.788651  | 1.038195  |
| H | -4.048694 | 0.914764  | 0.018802  |
| C | -2.213406 | 0.459491  | 1.155523  |
| H | -1.929903 | 0.499841  | 2.221405  |
| C | -1.883870 | -1.013641 | 0.706217  |
| N | -0.443834 | -1.261488 | 0.531554  |
| C | 0.339081  | -0.328860 | -0.292232 |
| H | 0.014308  | -0.480632 | -1.334208 |
| C | 1.785867  | -0.770385 | -0.201603 |
| C | 2.778284  | -0.079177 | 0.494615  |
| C | 2.126478  | -1.976627 | -0.823503 |
| C | 4.081859  | -0.567250 | 0.561493  |
| H | 2.542048  | 0.852785  | 1.005166  |
| C | 3.417982  | -2.481067 | -0.767096 |
| H | 1.352615  | -2.531775 | -1.352315 |
| C | 4.389579  | -1.764636 | -0.071829 |
| H | 4.848997  | -0.025613 | 1.108369  |
| H | 3.676652  | -3.417112 | -1.255486 |
| C | -1.349778 | 1.428068  | 0.421699  |
| C | -0.012324 | 1.102933  | 0.064820  |
| C | -0.496793 | 3.243222  | -0.596073 |
| C | -0.183847 | 4.483157  | -1.178722 |
| C | 1.632955  | 2.381680  | -1.331136 |
| C | 1.011114  | 4.654690  | -1.835810 |
| H | -0.915043 | 5.284669  | -1.109958 |

|    |           |           |           |
|----|-----------|-----------|-----------|
| C  | 1.923323  | 3.579702  | -1.923451 |
| H  | 2.289596  | 1.519351  | -1.362192 |
| H  | 1.251109  | 5.609377  | -2.297553 |
| H  | 2.861526  | 3.682889  | -2.460210 |
| Cl | 6.020086  | -2.382465 | 0.001110  |
| H  | 0.453998  | 1.183694  | 1.626056  |
| H  | -0.017920 | -1.301609 | 1.458118  |
| Cl | 0.738121  | 1.036096  | 3.020286  |
| C  | -1.619945 | 2.741667  | 0.076389  |
| H  | -2.522265 | 3.300872  | 0.293879  |
| N  | 0.459105  | 2.219613  | -0.650250 |
| C  | -2.371325 | -1.985893 | 1.768333  |
| H  | -1.855175 | -1.780506 | 2.715467  |
| H  | -3.446568 | -1.880899 | 1.938152  |
| H  | -2.164526 | -3.018854 | 1.476704  |
| C  | -2.536617 | -1.239499 | -0.657322 |
| O  | -2.302282 | -0.557205 | -1.636012 |
| O  | -3.415101 | -2.253954 | -0.657226 |
| C  | -4.072145 | -2.491269 | -1.921640 |
| C  | -4.973951 | -3.681150 | -1.744035 |
| H  | -3.303886 | -2.651503 | -2.687328 |
| H  | -4.619555 | -1.582204 | -2.200899 |
| H  | -5.498641 | -3.899372 | -2.680202 |
| H  | -4.401283 | -4.569800 | -1.459015 |
| H  | -5.723760 | -3.496747 | -0.967714 |

**(1R,3S,4R)-3a**

M06-L SCF energy in solvent: -1610.724744 a.u

|   |           |           |           |
|---|-----------|-----------|-----------|
| C | 4.202052  | 0.685093  | -3.059164 |
| H | 3.649562  | 0.403366  | -3.957070 |
| H | 5.236889  | 0.989236  | -3.202908 |
| C | 3.635162  | 0.658913  | -1.853515 |
| H | 4.204308  | 0.948176  | -0.971119 |
| C | 2.209231  | 0.254397  | -1.618006 |
| H | 1.729569  | 0.140110  | -2.605043 |
| C | 2.013326  | -1.133642 | -0.950005 |
| N | 0.559858  | -1.350052 | -0.845241 |
| C | -0.140655 | -0.519987 | 0.151026  |
| H | 0.058959  | -0.867569 | 1.191169  |
| C | -1.629866 | -0.669487 | -0.088481 |
| C | -2.201282 | -0.183415 | -1.267156 |
| C | -2.445452 | -1.314131 | 0.839146  |
| C | -3.558179 | -0.333385 | -1.516236 |
| H | -1.561455 | 0.314300  | -1.995714 |



|    |           |           |           |
|----|-----------|-----------|-----------|
| C  | -3.810268 | -1.475927 | 0.609500  |
| H  | -2.007104 | -1.698404 | 1.762143  |
| C  | -4.351997 | -0.982130 | -0.571182 |
| H  | -4.005296 | 0.044923  | -2.432007 |
| H  | -4.446627 | -1.978668 | 1.333346  |
| C  | 1.436888  | 1.258220  | -0.817431 |
| C  | 0.371991  | 0.869904  | -0.017092 |
| C  | 0.665674  | 3.105104  | 0.218311  |
| C  | 0.340593  | 4.358940  | 0.768675  |
| C  | -1.122745 | 2.112003  | 1.540376  |
| C  | -0.681883 | 4.482526  | 1.675971  |
| H  | 0.926506  | 5.220819  | 0.457231  |
| C  | -1.420060 | 3.335583  | 2.064437  |
| H  | -1.654029 | 1.198964  | 1.791251  |
| H  | -0.927137 | 5.453328  | 2.099519  |
| H  | -2.230953 | 3.411715  | 2.783092  |
| Cl | -6.058886 | -1.178072 | -0.879942 |
| C  | 1.622245  | 2.641945  | -0.680782 |
| H  | 2.375757  | 3.248948  | -1.168568 |
| N  | -0.104028 | 1.985112  | 0.626881  |
| C  | 2.580462  | -2.242390 | -1.828877 |
| H  | 2.065151  | -2.238250 | -2.796458 |
| H  | 3.650275  | -2.090075 | -2.005813 |
| H  | 2.441360  | -3.225235 | -1.364462 |
| C  | 2.697215  | -1.202028 | 0.423142  |
| O  | 3.530725  | -0.444785 | 0.868195  |
| O  | 2.232592  | -2.275240 | 1.110447  |
| C  | 2.784541  | -2.432391 | 2.432804  |
| C  | 2.073183  | -3.585551 | 3.085994  |
| H  | 2.649420  | -1.490032 | 2.977679  |
| H  | 3.865012  | -2.598798 | 2.342679  |
| H  | 2.460859  | -3.745624 | 4.097552  |
| H  | 0.997116  | -3.392183 | 3.161265  |
| H  | 2.212765  | -4.511412 | 2.517827  |
| H  | 0.391755  | -2.324613 | -0.605936 |
